# Supplementary material for: The complex role of transcription factor GAGA in germline death during Drosophila spermatogenesis: transcriptomic and bioinformatic analyses
Source: PeerJ journal article supplement (doi:10.7717/peerj.14063), 2023-01-09

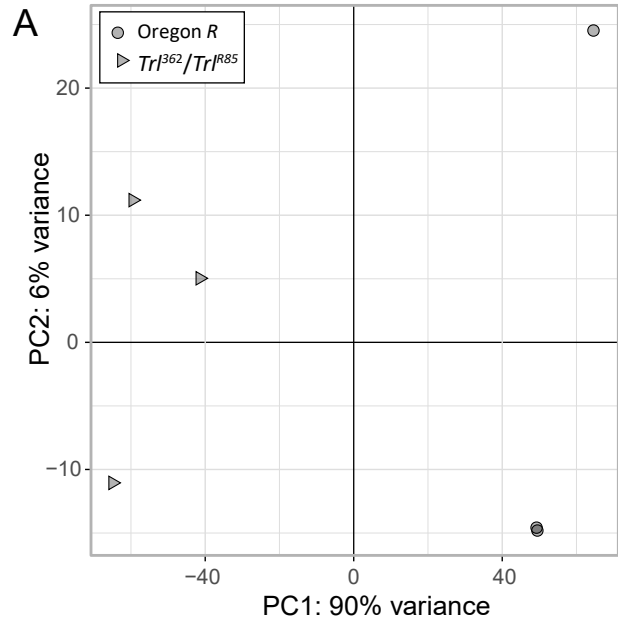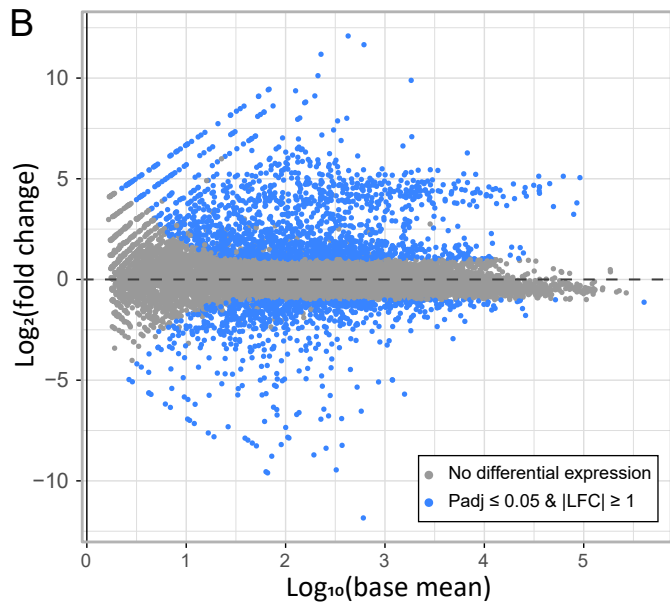

Supplement: Figure_S1.pdf [file Figure_S1.pdf]
