# Supplementary material for: The complex role of transcription factor GAGA in germline death during Drosophila spermatogenesis: transcriptomic and bioinformatic analyses
Source: PeerJ. 2023 Jan 9;11:e14063. doi: 10.7717/peerj.14063 (PMC9835689; doi:10.7717/peerj.14063)
Supplement: Table S3 — List 1. Results of the differential gene expression analysis of the Oregon R (as control) and Trl-mutant testis. Different GO analysis using Flybase GO lists of genes. List 2 (Vedelek et al., 2018) dataset (left part), including testis specificity index of Drosophila genes, were compared to our RNA-seq results. [file peerj-11-14063-s009.xlsx]

## Sheet: testes RNA-seq results
Flybase id	baseMean	log2FoldChange	Fold change	lfcSE	stat	pvalue	padj	gene name	GO: mitochondrion	GO:respiratory chain complex	GO;apoptotic process	GO: cell death	GO:programmed cell death	GO:cellular response to stress	GO:autophagy	GO:lysosome
FBgn0263405	429.797	12.0936	4370.43	1.18998	10.1628	2.90542e-24	1.80695e-22	lncRNA:CR43451	0	0	0	0	0	0	0	0
FBgn0264570	620.058	11.6601	3236.16	1.18935	9.80371	1.08524e-22	5.95982e-21	lncRNA:CR43942	0	0	0	0	0	0	0	0
FBgn0250817	229.175	11.1859	2329.64	1.19696	9.34527	9.16592e-21	4.27537e-19	lncRNA:CR40465	0	0	0	0	0	0	0	0
FBgn0265079	213.543	10.1217	1114.14	1.19328	8.48226	2.20857e-17	7.30486e-16	lncRNA:CR44190	0	0	0	0	0	0	0	0
FBgn0051779	1851.43	9.89	948.824	0.771703	12.8158	1.33753e-37	2.46394e-35	Acp24A4	0	0	0	0	0	0	0	0
FBgn0038151	68.8932	9.45134	700.061	1.21524	7.77733	7.40706e-15	1.86174e-13	yellow-e2	0	0	0	0	0	0	0	0
FBgn0000659	7.27069	1.49304	2.81482	1.40043	1.06613	0.286363	0.431859	fkh	0	0	1	1	1	0	0	0
FBgn0266797	67.4099	9.4198	684.923	1.21729	7.7383	1.00751e-14	2.48093e-13	lncRNA:CR45259	0	0	0	0	0	0	0	0
FBgn0286914	127.134	9.37202	662.613	1.20018	7.80883	5.7723e-15	1.48156e-13	lncRNA:CR46414	0	0	0	0	0	0	0	0
FBgn0004425	198.623	9.11773	555.535	1.08657	8.3913	4.80778e-17	1.52435e-15	LysB	0	0	0	0	0	0	0	0
FBgn0265584	54.2202	9.10656	551.25	1.21788	7.4774	7.58079e-14	1.6741e-12	lncRNA:CR44411	0	0	0	0	0	0	0	0
FBgn0264879	53.7449	9.09272	545.985	1.22716	7.40957	1.26712e-13	2.72787e-12	lncRNA:CR44070	0	0	0	0	0	0	0	0
FBgn0054025	160.733	8.81522	450.448	1.06321	8.29115	1.12156e-16	3.44346e-15	CG34025	0	0	0	0	0	0	0	0
FBgn0266306	156.675	8.77808	439.001	1.04415	8.40689	4.21008e-17	1.35252e-15	lncRNA:CR44971	0	0	0	0	0	0	0	0
FBgn0262815	75.4826	8.62056	393.592	1.22199	7.05454	1.73168e-12	3.28141e-11	CR43186	0	0	0	0	0	0	0	0
FBgn0034666	38.5	8.61148	391.124	1.23972	6.94632	3.74941e-12	6.84633e-11	CG9294	0	0	0	0	0	0	0	0
FBgn0267229	35.261	8.4844	358.146	1.24309	6.82524	8.77801e-12	1.5226e-10	lncRNA:CR45669	0	0	0	0	0	0	0	0
FBgn0263290	32.2868	8.35963	328.474	1.24576	6.71047	1.93996e-11	3.21186e-10	lncRNA:CR43399	0	0	0	0	0	0	0	0
FBgn0262983	61.3114	8.31847	319.233	1.21341	6.85545	7.10885e-12	1.24928e-10	CG43291	0	0	0	0	0	0	0	0
FBgn0267935	61.0492	8.31088	317.559	1.2171	6.82843	8.58465e-12	1.49799e-10	lncRNA:CR46215	0	0	0	0	0	0	0	0
FBgn0035315	56.3261	8.19522	293.095	1.21719	6.73292	1.6629e-11	2.77207e-10	CG8960	0	0	0	0	0	0	0	0
FBgn0263328	28.3434	8.17034	288.083	1.25254	6.523	6.89152e-11	1.06017e-09	lncRNA:CR43409	0	0	0	0	0	0	0	0
FBgn0030666	28.034	8.15729	285.489	1.25774	6.48566	8.83453e-11	1.34066e-09	CG12708	0	0	0	0	0	0	0	0
FBgn0267158	52.7988	8.10117	274.596	1.22484	6.61405	3.73934e-11	5.9539e-10	lncRNA:CR45598	0	0	0	0	0	0	0	0
FBgn0264373	140.183	8.02459	260.401	0.932982	8.60102	7.90108e-18	2.7119e-16	lncRNA:CR43825	0	0	0	0	0	0	0	0
FBgn0024250	20.2956	0.60402	1.51995	0.547716	1.1028	0.270115	0.413745	brk	0	0	1	1	1	0	0	0
FBgn0030914	416.508	8.00914	257.627	0.789626	10.143	3.56161e-24	2.19628e-22	CG6106	0	0	0	0	0	0	0	0
FBgn0039444	133.362	7.95532	248.192	0.871429	9.12904	6.91069e-20	2.9493e-18	TwdlD	0	0	0	0	0	0	0	0
FBgn0267055	336.463	7.87709	235.093	0.539747	14.594	3.06551e-48	8.74751e-46	CR45499	0	0	0	0	0	0	0	0
FBgn0085340	21.0493	7.73961	213.724	1.27959	6.0485	1.46202e-09	1.90823e-08	CR34311	0	0	0	0	0	0	0	0
FBgn0026319	47.0359	0.555529	1.46971	0.341609	1.62621	0.103904	0.198467	Traf4	0	0	1	1	1	1	0	0
FBgn0030200	306.852	7.42626	172	0.498464	14.8983	3.38161e-50	1.02526e-47	RabX2	0	0	0	0	0	0	0	0
FBgn0262895	31.2559	7.34064	162.089	1.28471	5.71387	1.10436e-08	1.28062e-07	lncRNA:CR43250	0	0	0	0	0	0	0	0
FBgn0033836	15.5611	7.30724	158.38	1.29863	5.62687	1.83507e-08	2.06223e-07	CG18278	0	0	0	0	0	0	0	0
FBgn0003892	273.142	0.440181	1.35678	0.248675	1.77011	0.0767093	0.155524	ptc	0	0	1	1	1	0	0	0
FBgn0011766	812.496	0.426941	1.34438	0.235862	1.81013	0.070276	0.14513	E2f1	0	0	1	1	1	0	0	0
FBgn0263742	29.5887	7.26093	153.376	1.25676	5.77751	7.58142e-09	9.01408e-08	CG43667	0	0	0	0	0	0	0	0
FBgn0011763	771.985	0.379539	1.30093	0.187598	2.02315	0.0430573	0.0979235	Dp	0	0	1	1	1	1	0	0
FBgn0020381	368.603	0.378143	1.29967	0.179381	2.10804	0.0350273	0.0832928	Dredd	0	0	1	1	1	0	0	0
FBgn0024291	551.586	0.354969	1.27896	0.1594	2.22691	0.0259531	0.0652211	Sirt1	0	0	1	1	1	0	0	0
FBgn0052640	29.5368	7.26025	153.304	1.25037	5.80649	6.37949e-09	7.67279e-08	CG32640	0	0	0	0	0	0	0	0
FBgn0028406	31.4329	0.335978	1.26223	0.41418	0.811189	0.417257	0.568624	Drep4	0	0	1	1	1	0	0	0
FBgn0024732	110.547	0.321473	1.24961	0.241595	1.33062	0.183313	0.308803	Drep1	0	0	1	1	1	0	0	0
FBgn0028407	682.7	0.297773	1.22925	0.153728	1.93701	0.0527435	0.114976	Drep3	0	0	1	1	1	0	0	0
FBgn0051928	28.2496	7.19608	146.634	1.24813	5.76551	8.14128e-09	9.6247e-08	CG31928	0	0	0	1	0	0	0	1
FBgn0015277	207.104	0.292124	1.22444	0.220987	1.32191	0.186199	0.31258	Pi3K59F	0	0	1	1	1	1	1	0
FBgn0003205	1065.31	0.279867	1.21408	0.14391	1.94473	0.051807	0.113341	Ras85D	0	0	1	1	1	1	1	0
FBgn0022027	957.909	0.239765	1.1808	0.144211	1.6626	0.0963918	0.18674	Vps25	0	0	1	1	1	0	1	0
FBgn0028381	18.1737	0.219142	1.16404	0.535177	0.409475	0.682191	0.792788	Decay	0	0	1	1	1	0	0	0
FBgn0015924	1657.19	0.211028	1.15751	0.237433	0.888789	0.374117	0.526447	crq	0	0	1	1	1	0	0	0
FBgn0004569	54.8892	0.204526	1.15231	0.337409	0.606167	0.544404	0.680746	aos	0	0	1	1	1	0	0	0
FBgn0004363	14156.7	0.191977	1.14233	0.115614	1.66051	0.0968129	0.187456	porin	1	0	1	1	1	0	0	0
FBgn0027609	779.47	0.180387	1.13319	0.146978	1.22731	0.219708	0.354597	morgue	0	0	1	1	1	0	0	0
FBgn0003882	611.444	0.171734	1.12641	0.156713	1.09585	0.273144	0.417155	tub	0	0	1	1	1	0	0	0
FBgn0001977	2143.37	0.159046	1.11655	0.143028	1.11199	0.266142	0.409079	CIAPIN1	0	0	1	1	1	0	0	0
FBgn0011706	46.6157	0.138388	1.10067	0.366819	0.377265	0.705977	0.810194	rpr	1	0	1	1	1	1	0	0
FBgn0002962	189.269	0.13417	1.09746	0.237256	0.565506	0.57173	0.70352	nos	0	0	1	1	1	0	0	0
FBgn0003607	2140.06	0.122526	1.08864	0.142896	0.857449	0.391197	0.543026	Su(var)205	0	0	1	1	1	0	0	0
FBgn0005672	1407.17	0.122049	1.08828	0.133699	0.912859	0.361317	0.512949	spi	0	0	1	1	1	0	0	0
FBgn0004436	2568.22	0.0712958	1.05066	0.1337	0.53325	0.59386	0.722041	Ubc6	0	0	1	1	1	1	1	0
FBgn0026080	482.917	0.0665819	1.04723	0.156677	0.424962	0.670865	0.783806	Tip60	0	0	1	1	1	0	0	0
FBgn0023076	5503.77	0.0562278	1.03974	0.20562	0.273455	0.784504	0.864392	Clk	0	0	1	1	1	0	0	0
FBgn0038233	4510.88	0.0530167	1.03743	0.136346	0.38884	0.697395	0.803959	HtrA2	1	0	1	1	1	0	0	0
FBgn0002413	2578.25	0.0513097	1.03621	0.177817	0.288553	0.772923	0.857213	dco	0	0	1	1	1	0	0	0
FBgn0020415	610.178	0.0500012	1.03527	0.172318	0.290169	0.771687	0.856986	Idgf2	0	0	1	1	1	0	0	0
FBgn0021761	979.747	-0.00335616	0.997676	0.183774	-0.0182624	0.985429	0.991836	Nup154	0	0	1	1	1	0	0	0
FBgn0010379	2549.73	-0.0323162	0.977849	0.131077	-0.246543	0.805262	0.877038	Akt1	0	0	1	1	1	1	0	0
FBgn0033690	168.269	-0.0390844	0.973272	0.213481	-0.183081	0.854734	0.912393	EndoG	1	0	1	1	1	0	0	0
FBgn0005613	9.40821	-0.0413971	0.971713	0.693035	-0.0597331	0.952368	0.972772	Sox15	0	0	1	1	1	0	0	0
FBgn0000546	115.23	-0.0550265	0.962577	0.338539	-0.162541	0.87088	0.922007	EcR	0	0	1	1	1	0	1	0
FBgn0024329	531.245	-0.0658814	0.955361	0.225944	-0.291583	0.770605	0.856209	Mekk1	0	0	1	1	1	1	0	0
FBgn0004583	280.713	-0.0709044	0.952041	0.243699	-0.29095	0.771089	0.856419	ex	0	0	1	1	1	0	0	0
FBgn0024371	2312.82	-0.0810407	0.945375	0.12313	-0.658171	0.510428	0.652174	E2f2	0	0	1	1	1	0	0	0
FBgn0003997	319.139	-0.0875101	0.941146	0.206718	-0.42333	0.672054	0.784755	hid	1	0	1	1	1	1	1	0
FBgn0015247	4409.16	-0.0919377	0.938262	0.127782	-0.71949	0.471839	0.617858	Diap2	0	0	1	1	1	0	0	0
FBgn0015799	2331.58	-0.0930677	0.937527	0.161573	-0.57601	0.564608	0.697161	Rbf	0	0	1	1	1	1	0	0
FBgn0013762	671.27	-0.103758	0.930606	0.159174	-0.651854	0.514495	0.655902	Cdk5	0	0	1	1	1	1	0	0
FBgn0013726	1136.02	-0.127934	0.915141	0.18696	-0.684286	0.493795	0.638036	pnut	1	0	1	1	1	0	0	0
FBgn0015544	2541.87	-0.155196	0.898011	0.135242	-1.14754	0.251157	0.392135	spag	0	0	1	1	1	0	0	0
FBgn0000320	1520.99	-0.164328	0.892344	0.157593	-1.04274	0.297069	0.44382	eya	0	0	1	1	1	1	0	0
FBgn0015664	521.671	-0.19471	0.873749	0.214397	-0.908171	0.363788	0.515602	Dref	0	0	1	1	1	0	0	0
FBgn0003079	351.206	-0.206951	0.866366	0.195671	-1.05765	0.290216	0.436234	Raf	0	0	1	1	1	1	1	0
FBgn0013277	18.6226	6.59091	96.3964	1.37004	4.81076	1.50359e-06	1.20229e-05	Hsp70Ba	0	0	0	0	0	1	0	0
FBgn0020224	2189.81	-0.239239	0.847192	0.131972	-1.8128	0.0698624	0.144583	Cbl	0	0	1	1	1	0	0	0
FBgn0011710	1439.97	-0.265654	0.831822	0.127472	-2.08401	0.0371591	0.0873347	Sep1	0	0	1	1	1	0	0	0
FBgn0010501	233.052	-0.26705	0.831017	0.195252	-1.36772	0.171401	0.293977	Dcp-1	1	0	1	1	1	1	1	0
FBgn0025790	1687.65	-0.276995	0.825308	0.142758	-1.94031	0.0523419	0.114254	TBPH	0	0	1	1	1	0	0	0
FBgn0263025	6799.51	6.28589	78.0265	0.331773	18.9464	4.73068e-80	4.04974e-77	HSPBAP1	0	0	0	0	0	0	0	0
FBgn0002781	1653.31	-0.316409	0.803066	0.143858	-2.19945	0.0278459	0.0690125	mod(mdg4)	0	0	1	1	1	0	0	0
FBgn0034783	233.735	7.17708	144.716	0.518148	13.8514	1.24748e-43	3.07705e-41	CG9825	0	0	0	0	0	0	0	0
FBgn0266800	14.2125	7.17387	144.394	1.31242	5.46614	4.5993e-08	4.78725e-07	lncRNA:CR45262	0	0	0	0	0	0	0	0
FBgn0058469	50.3208	7.13045	140.113	1.07606	6.62644	3.4389e-11	5.50564e-10	lncRNA:CR40469	0	0	0	0	0	0	0	0
FBgn0263331	49.6334	7.10754	137.906	1.12563	6.31429	2.71411e-10	3.91849e-09	lncRNA:CR43412	0	0	0	0	0	0	0	0
FBgn0038067	1878.07	7.09123	136.355	0.57001	12.4405	1.57472e-35	2.66476e-33	CG11598	0	0	0	0	0	0	0	0
FBgn0010441	330.692	-0.371324	0.773072	0.178648	-2.07853	0.037661	0.0883025	pll	0	0	1	1	1	0	0	0
FBgn0267969	13.3	7.08001	135.299	1.34433	5.26658	1.38992e-07	1.33427e-06	lncRNA:CR46247	0	0	0	0	0	0	0	0
FBgn0267691	94.041	7.03218	130.887	0.767871	9.15802	5.28569e-20	2.33099e-18	CR46027	0	0	0	0	0	0	0	0
FBgn0003444	188.238	-0.386155	0.765166	0.249472	-1.54789	0.121649	0.225351	smo	0	0	1	1	1	0	0	0
FBgn0019972	303.502	-0.389444	0.763424	0.190793	-2.04119	0.0412319	0.0947495	Drice	0	0	1	1	1	1	0	0
FBgn0266398	46.2293	7.00081	128.072	1.15494	6.06164	1.34739e-09	1.77936e-08	lncRNA:CR45038	0	0	0	0	0	0	0	0
FBgn0033970	45.7492	6.99806	127.828	1.2635	5.53861	3.04875e-08	3.27201e-07	CG10205	0	0	0	0	0	0	0	0
FBgn0266698	135.817	6.97996	126.234	0.635984	10.975	5.03795e-28	4.16576e-26	lncRNA:CR45188	0	0	0	0	0	0	0	0
FBgn0266862	44.8322	6.95668	124.214	1.15259	6.03571	1.58262e-09	2.05092e-08	lncRNA:CR45323	0	0	0	0	0	0	0	0
FBgn0262580	365.055	6.90238	119.626	0.512998	13.455	2.87727e-41	6.64649e-39	CG43120	0	0	0	0	0	0	0	0
FBgn0021796	803.023	-0.463689	0.72513	0.21943	-2.11315	0.0345879	0.0824232	Tor	0	0	1	1	1	0	1	0
FBgn0267805	42.9748	6.89713	119.191	1.11859	6.16592	7.00758e-10	9.53096e-09	lncRNA:CR46130	0	0	0	0	0	0	0	0
FBgn0266774	11.442	6.85856	116.047	1.37597	4.98454	6.21101e-07	5.3707e-06	lncRNA:CR45239	0	0	0	0	0	0	0	0
FBgn0035553	10.4757	6.73865	106.792	1.38195	4.87619	1.08152e-06	8.90237e-06	CG13722	0	0	0	0	0	0	0	0
FBgn0028416	37.9578	6.73107	106.232	1.66167	4.05079	5.10444e-05	0.000293269	Met75Ca	0	0	0	0	0	0	0	0
FBgn0265905	10.257	6.70448	104.292	1.42969	4.68946	2.73933e-06	2.09708e-05	lncRNA:CR44694	0	0	0	0	0	0	0	0
FBgn0085291	10.2518	6.70358	104.227	1.35136	4.96061	7.02737e-07	6.00877e-06	CR34262	0	0	0	0	0	0	0	0
FBgn0053965	9.91446	6.65587	100.836	1.35753	4.90291	9.44276e-07	7.89773e-06	CG33965	0	0	0	0	0	0	0	0
FBgn0004428	1529.82	6.63137	99.1381	0.557601	11.8927	1.29212e-32	1.60078e-30	LysE	0	0	0	0	0	0	0	0
FBgn0001229	243.46	0.51585	1.42984	0.441403	1.16866	0.242541	0.381753	Hsp67Bc	0	0	0	0	0	1	1	0
FBgn0266589	86.0622	6.58037	95.695	0.800315	8.22223	1.99758e-16	6.0188e-15	lncRNA:CR45114	0	0	0	0	0	0	0	0
FBgn0261631	137.356	6.57365	95.25	0.559569	11.7477	7.25779e-32	8.1878e-30	CG42714	0	0	0	0	0	0	0	0
FBgn0003731	296.161	-0.51829	0.698199	0.231492	-2.23891	0.0251615	0.0636001	Egfr	0	0	1	1	1	0	0	0
FBgn0267607	132.591	6.49643	90.2858	0.965031	6.73183	1.67537e-11	2.78966e-10	lncRNA:CR45945	0	0	0	0	0	0	0	0
FBgn0266764	32.6021	6.49558	90.233	1.14923	5.65213	1.5847e-08	1.79611e-07	lncRNA:CR45229	0	0	0	0	0	0	0	0
FBgn0264566	80.9674	6.48628	89.6529	0.782403	8.2902	1.13058e-16	3.46385e-15	CG43938	0	0	0	0	0	0	0	0
FBgn0267926	8.8075	6.48557	89.6086	1.40273	4.62355	3.77237e-06	2.79955e-05	lncRNA:CR46207	0	0	0	0	0	0	0	0
FBgn0264512	148.195	6.48291	89.4437	1.02493	6.32523	2.5286e-10	3.66156e-09	lncRNA:CR43911	0	0	0	0	0	0	0	0
FBgn0083044	17.2531	6.47707	89.0826	1.29298	5.0094	5.46011e-07	4.76385e-06	snoRNA:Psi18S-1397	0	0	0	0	0	0	0	0
FBgn0261057	144.199	6.45147	87.5159	1.14882	5.61576	1.95699e-08	2.19078e-07	Sfp36F	0	0	0	0	0	0	0	0
FBgn0263842	46.159	6.4069	84.8534	1.00229	6.39229	1.63419e-10	2.42924e-09	CG43703	0	0	0	0	0	0	0	0
FBgn0031957	8.21889	6.38521	83.5871	1.51836	4.20533	2.60702e-05	0.000159882	TwdlE	0	0	0	0	0	0	0	0
FBgn0052318	8.06991	6.35848	82.0529	1.40599	4.52244	6.11315e-06	4.32077e-05	CG32318	0	0	0	0	0	0	0	0
FBgn0265200	7.91989	6.33129	80.5207	1.4138	4.47821	7.52727e-06	5.20154e-05	lncRNA:CR44260	0	0	0	0	0	0	0	0
FBgn0052036	159.989	6.32974	80.4346	0.607046	10.4271	1.86436e-25	1.23891e-23	CG32036	0	0	0	0	0	0	0	0
FBgn0010052	101.198	6.32654	80.2559	0.599398	10.5548	4.8256e-26	3.40908e-24	Jhe	1	0	0	0	0	0	0	0
FBgn0035545	15.2229	6.29492	78.5164	1.33625	4.7109	2.46626e-06	1.90305e-05	CG12607	0	0	0	0	0	0	0	0
FBgn0001227	96.9605	0.508027	1.4221	0.245946	2.06561	0.0388656	0.0905122	Hsp67Ba	0	0	0	0	0	0	0	0
FBgn0266139	27.5562	6.25676	76.4667	1.15228	5.42988	5.63908e-08	5.7752e-07	lncRNA:CR44845	0	0	0	0	0	0	0	0
FBgn0264709	279.235	6.2502	76.1199	0.806098	7.75365	8.92908e-15	2.22508e-13	lncRNA:CR43978	0	0	0	0	0	0	0	0
FBgn0036178	118.536	6.17939	72.4739	0.63167	9.78263	1.33697e-22	7.26004e-21	CG14137	0	0	0	0	0	0	0	0
FBgn0266643	7.1412	6.17909	72.4586	1.51226	4.086	4.38867e-05	0.000256088	lncRNA:CR45150	0	0	0	0	0	0	0	0
FBgn0039299	13.8195	6.15366	71.1928	1.3203	4.66082	3.1495e-06	2.38474e-05	CG11854	0	0	0	0	0	0	0	0
FBgn0051014	536.104	6.13678	70.3645	0.39754	15.4369	9.24846e-54	3.4511e-51	PH4alphaSG1	0	0	0	0	0	0	0	0
FBgn0266154	6.89893	6.13067	70.0672	1.46803	4.17613	2.96509e-05	0.000178967	lncRNA:CR44860	0	0	0	0	0	0	0	0
FBgn0053236	24.826	6.11588	69.3527	1.19074	5.13619	2.80367e-07	2.56938e-06	Ste:CG33236	0	0	0	0	0	0	0	0
FBgn0265424	133.921	6.06988	67.1761	0.594117	10.2166	1.67055e-24	1.05244e-22	lncRNA:TS14	0	0	0	0	0	0	0	0
FBgn0283626	106.597	6.02787	65.2485	0.651691	9.24959	2.25357e-20	1.02488e-18	lncRNA:CR46299	0	0	0	0	0	0	0	0
FBgn0033395	70.3694	6.02319	65.0371	0.72628	8.29321	1.10232e-16	3.39156e-15	Cyp4p2	0	0	0	0	0	0	0	0
FBgn0264471	170.517	5.96408	62.4261	0.569568	10.4712	1.17124e-25	7.92795e-24	lncRNA:CR43879	0	0	0	0	0	0	0	0
FBgn0263094	68.9564	5.96029	62.2626	1.14455	5.20756	1.91336e-07	1.79646e-06	CG43362	0	0	0	0	0	0	0	0
FBgn0030583	212.811	5.94377	61.5534	0.495029	12.0069	3.26877e-33	4.17965e-31	CG14410	0	0	0	0	0	0	0	0
FBgn0264988	324.02	5.92596	60.7984	0.803847	7.372	1.6809e-13	3.56073e-12	CG44139	0	0	0	0	0	0	0	0
FBgn0263505	148.891	5.86581	58.3158	0.557602	10.5197	7.00909e-26	4.904e-24	lncRNA:CR43494	0	0	0	0	0	0	0	0
FBgn0040255	20.7642	5.84457	57.4635	1.15694	5.05177	4.37725e-07	3.89377e-06	Ugt35E2	0	0	0	0	0	0	0	0
FBgn0265886	177.644	5.83717	57.1695	0.519103	11.2447	2.45831e-29	2.30812e-27	lncRNA:CR44675	0	0	0	0	0	0	0	0
FBgn0267562	133.681	5.83139	56.9406	0.565283	10.3159	5.9741e-25	3.8813e-23	lncRNA:CR45902	0	0	0	0	0	0	0	0
FBgn0287465	101.6	5.80333	55.8442	0.522876	11.0989	1.27033e-28	1.08748e-26	lncRNA:CR46454	0	0	0	0	0	0	0	0
FBgn0265739	315.51	5.78241	55.0401	0.950547	6.08325	1.17773e-09	1.56383e-08	lncRNA:CR44546	0	0	0	0	0	0	0	0
FBgn0265095	79.0307	5.76716	54.4613	0.706155	8.16699	3.16192e-16	9.25863e-15	lncRNA:CR44200	0	0	0	0	0	0	0	0
FBgn0264515	215.508	5.75548	54.022	0.491151	11.7183	1.0266e-31	1.14924e-29	lncRNA:CR43914	0	0	0	0	0	0	0	0
FBgn0266214	5.2151	5.73082	53.1067	1.54677	3.70502	0.000211373	0.00104204	lncRNA:CR44909	0	0	0	0	0	0	0	0
FBgn0265581	86.7818	5.72662	52.9523	0.634343	9.02764	1.75417e-19	7.2524e-18	lncRNA:CR44408	0	0	0	0	0	0	0	0
FBgn0266209	105.136	5.71927	52.683	0.582995	9.81015	1.01821e-22	5.6129e-21	lncRNA:CR44904	0	0	0	0	0	0	0	0
FBgn0038519	1876.32	0.00522017	1.00362	0.165426	0.0315559	0.974826	0.986142	Prx3	1	0	1	1	1	1	0	0
FBgn0035852	10517.4	-0.00471989	0.996734	0.136258	-0.0346393	0.972367	0.985368	CG7387	1	0	1	1	1	0	0	0
FBgn0261276	1932.23	-0.0271112	0.981383	0.160201	-0.169232	0.865614	0.919174	Opa1	1	0	1	1	1	1	0	0
FBgn0036165	1052.85	-0.0582215	0.960447	0.223473	-0.26053	0.794455	0.87002	chrb	0	0	1	1	1	0	0	0
FBgn0038196	4561.52	0.047125	1.0332	0.157075	0.300015	0.764166	0.851916	CG9922	0	0	1	1	1	0	0	0
FBgn0039592	7.13064	-0.381013	0.767898	1.13056	-0.337013	0.736107	0.832108	CG14062	1	0	1	1	1	0	0	0
FBgn0032493	1.86036	0.615719	1.53232	1.65916	0.371102	0.710561	0.813659	Mabi	0	0	1	1	1	0	0	0
FBgn0284421	2869.02	-0.0473048	0.967743	0.123195	-0.383982	0.700992	0.806764	Psn	1	0	1	1	1	0	0	1
FBgn0261530	1378.87	0.0473379	1.03336	0.121483	0.389667	0.696783	0.8039	nbs	0	0	1	1	1	1	0	0
FBgn0052817	21.9904	0.213514	1.15951	0.522933	0.408302	0.683052	0.793396	CG32817	0	0	1	1	1	0	0	0
FBgn0260945	670.128	-0.0893208	0.939965	0.198578	-0.449802	0.652853	0.76931	Atg1	0	0	1	1	1	1	1	0
FBgn0037481	398.488	-0.0839982	0.943439	0.182396	-0.460526	0.645139	0.763495	MAGE	0	0	1	1	1	1	0	0
FBgn0086676	2052.65	0.0672097	1.04769	0.141217	0.475931	0.634124	0.755085	spin	0	0	1	1	1	1	0	0
FBgn0029594	649.006	0.0797015	1.0568	0.157548	0.505888	0.612935	0.737621	Coa8	1	0	1	1	1	0	0	0
FBgn0034279	19.6119	-0.273252	0.827452	0.523423	-0.522049	0.601636	0.728057	CG18635	0	0	1	1	1	0	0	0
FBgn0264291	439.975	-0.0945244	0.936581	0.179888	-0.525461	0.599263	0.72609	Det	0	0	1	1	1	0	0	0
FBgn0034727	849.172	-0.0964086	0.935359	0.180021	-0.53554	0.592276	0.720728	mRpS29	1	0	1	1	1	0	0	0
FBgn0260940	406.977	-0.0844994	0.943112	0.156682	-0.539304	0.589677	0.718604	lsn	0	0	1	1	1	0	0	0
FBgn0087011	1802.36	0.0808386	1.05763	0.146134	0.553182	0.580139	0.710969	CG41520	0	0	1	1	1	0	0	0
FBgn0261984	904.507	-0.124528	0.917304	0.213481	-0.583322	0.559677	0.6926	Ire1	0	0	1	1	1	1	0	0
FBgn0033971	397.66	-0.0950033	0.93627	0.151638	-0.626513	0.530978	0.670077	CG10209	0	0	1	1	1	0	0	0
FBgn0034894	475.283	-0.0944946	0.9366	0.148384	-0.636826	0.524238	0.664022	sigmar	0	0	1	1	1	1	1	0
FBgn0286781	3445.55	-0.0847418	0.942953	0.132486	-0.639626	0.522416	0.662681	cass	0	0	1	1	1	0	0	0
FBgn0036833	11.2528	0.489947	1.40439	0.671514	0.729616	0.465625	0.612131	CG3819	1	0	1	1	1	0	0	0
FBgn0031030	758.923	-0.179015	0.883306	0.242471	-0.738292	0.460337	0.607976	Tao	0	0	1	1	1	0	0	0
FBgn0052176	737.449	0.103046	1.07404	0.13752	0.749316	0.453667	0.602447	CG32176	0	0	1	1	1	0	0	0
FBgn0067102	252.188	0.15494	1.11338	0.201305	0.76968	0.44149	0.591511	GlcT	0	0	1	1	1	0	0	0
FBgn0031820	3409.9	-0.165302	0.891742	0.214336	-0.771231	0.44057	0.590769	Daxx	0	0	1	1	1	0	0	0
FBgn0029093	4985.28	0.106183	1.07638	0.136968	0.775239	0.438198	0.588749	cathD	0	0	1	1	1	0	0	1
FBgn0283521	3836.24	0.125734	1.09106	0.160532	0.783228	0.433493	0.584294	lola	0	0	1	1	1	0	0	0
FBgn0032209	80.0843	-0.239715	0.846913	0.30155	-0.794941	0.426648	0.577689	Hand	0	0	1	1	1	0	0	0
FBgn0243512	445.333	0.142966	1.10417	0.171007	0.836027	0.40314	0.554475	puc	0	0	1	1	1	1	0	0
FBgn0033985	6.02695	0.846746	1.79844	0.936704	0.903963	0.366015	0.518052	CG10257	0	0	1	1	1	0	0	0
FBgn0052666	413.445	-0.212147	0.863252	0.226425	-0.93694	0.34879	0.499797	Drak	0	0	1	1	1	0	0	0
FBgn0260744	1068.84	-0.130229	0.913687	0.132082	-0.985966	0.32415	0.473687	Tango9	1	0	1	1	1	0	0	0
FBgn0034763	1369.23	-0.124048	0.917609	0.118204	-1.04944	0.293975	0.440463	RYBP	0	0	1	1	1	0	0	0
FBgn0037857	5293.36	-0.166978	0.890706	0.159103	-1.0495	0.293948	0.440463	Tengl4	1	0	1	1	1	0	0	0
FBgn0052579	101.097	0.272711	1.20808	0.250752	1.08757	0.276784	0.421299	CG32579	0	0	1	1	1	0	0	0
FBgn0051679	5950.38	-0.167404	0.890444	0.150981	-1.10877	0.267528	0.410473	Tengl3	1	0	1	1	1	0	0	0
FBgn0035793	2162.39	0.171188	1.12599	0.152113	1.1254	0.260418	0.402877	CG7546	0	0	1	1	1	1	0	0
FBgn0051682	7295.57	-0.199723	0.870718	0.174072	-1.14736	0.251233	0.392212	Tengl1	1	0	1	1	1	0	0	0
FBgn0034970	1999.7	0.150823	1.1102	0.125487	1.2019	0.229403	0.366024	yki	0	0	1	1	1	0	0	1
FBgn0039593	4.13977	-1.79599	0.287974	1.46874	-1.22281	0.221403	0.356346	Sid	1	0	1	1	1	0	0	0
FBgn0033783	428.013	-0.227736	0.853974	0.184402	-1.235	0.216832	0.350734	CG17019	0	0	1	1	1	0	0	0
FBgn0261108	914.501	-0.218626	0.859384	0.176085	-1.24159	0.214387	0.347714	Atg13	0	0	1	1	1	0	1	0
FBgn0036831	7.53027	-1.01136	0.496079	0.812644	-1.24453	0.213306	0.34661	CG6839	1	0	1	1	1	0	0	0
FBgn0036887	1424.15	-0.160302	0.894838	0.127966	-1.25269	0.210317	0.343325	CG9231	1	0	1	1	1	1	0	0
FBgn0033051	77.201	0.459466	1.37503	0.335367	1.37004	0.170676	0.293142	Strica	0	0	1	1	1	0	0	0
FBgn0260635	4761.12	0.16201	1.11884	0.117119	1.38329	0.166577	0.287729	Diap1	0	0	1	1	1	1	0	0
FBgn0038948	839.253	-0.255148	0.837901	0.177969	-1.43367	0.151666	0.26741	PSR	0	0	1	1	1	1	0	0
FBgn0029524	127.208	0.363794	1.28681	0.246336	1.47682	0.139724	0.251286	CG3176	0	0	1	1	1	0	0	0
FBgn0039809	7820.87	-0.18627	0.878875	0.12591	-1.47939	0.139037	0.250328	CG15547	0	0	1	1	1	1	0	0
FBgn0030613	48.6927	0.510563	1.42461	0.331175	1.54167	0.123153	0.227558	Rab3-GEF	0	0	1	1	1	0	0	0
FBgn0039969	1566.43	0.233054	1.17532	0.151016	1.54324	0.122773	0.227028	Fis1	1	0	1	1	1	0	1	0
FBgn0041094	1721.89	0.312601	1.24195	0.201634	1.55034	0.121059	0.224516	scyl	0	0	1	1	1	0	0	0
FBgn0051005	501.503	-0.331099	0.794931	0.212848	-1.55557	0.119811	0.222739	qless	0	0	1	1	1	1	0	0
FBgn0029131	897.209	-0.236198	0.84898	0.151163	-1.56254	0.118161	0.220207	Debcl	1	0	1	1	1	1	1	0
FBgn0263933	1163.05	-0.28477	0.820872	0.169524	-1.67982	0.0929924	0.181483	ebi	0	0	1	1	1	1	0	0
FBgn0035871	22956.1	-0.23736	0.848296	0.138832	-1.70969	0.0873228	0.172547	BI-1	0	0	1	1	1	1	1	0
FBgn0264493	960.106	0.33283	1.25948	0.193837	1.71706	0.0859685	0.17038	rdx	0	0	1	1	1	1	0	0
FBgn0039016	812.191	-0.497995	0.70809	0.28609	-1.7407	0.0817368	0.16362	Dcr-1	0	0	1	1	1	0	0	0
FBgn0036321	4.18776	2.33045	5.02964	1.29977	1.79297	0.072977	0.149456	CG14120	1	0	1	1	1	0	0	0
FBgn0032754	310.749	-0.322806	0.799513	0.176601	-1.82788	0.067567	0.140512	CG10700	0	0	1	1	1	0	0	0
FBgn0034366	688.324	0.281936	1.21582	0.153081	1.84174	0.0655136	0.137024	Atg7	0	0	1	1	1	1	1	0
FBgn0262656	258.416	-0.653846	0.635584	0.352312	-1.85587	0.0634718	0.133503	Myc	0	0	1	1	1	0	1	0
FBgn0261456	777.931	-0.371441	0.77301	0.200122	-1.85607	0.0634436	0.133482	hpo	0	0	1	1	1	1	0	0
FBgn0259176	6767.98	-0.377412	0.769817	0.202839	-1.86065	0.0627935	0.132325	bun	0	0	1	1	1	0	0	0
FBgn0033716	4268.96	-0.215559	0.861212	0.115684	-1.86335	0.0624133	0.131619	Den1	0	0	1	1	1	0	0	0
FBgn0038965	2085.2	-0.232943	0.850897	0.123951	-1.87931	0.0602025	0.127883	mats	0	0	1	1	1	0	0	0
FBgn0038928	237.429	0.426332	1.34381	0.225058	1.89432	0.0581825	0.124373	Fadd	0	0	1	1	1	0	0	0
FBgn0053193	643.113	-0.337945	0.791167	0.173298	-1.95008	0.0511666	0.112312	sav	0	0	1	1	1	0	0	0
FBgn0034314	558.023	-0.341766	0.789075	0.168609	-2.02697	0.0426655	0.0972909	nopo	0	0	1	1	1	0	0	0
FBgn0032006	1280.6	-0.42455	0.745071	0.209187	-2.02952	0.0424056	0.0967893	Pvr	0	0	1	1	1	1	0	0
FBgn0086129	2987.22	-0.349357	0.784934	0.169406	-2.06225	0.0391841	0.0910937	snama	0	0	1	1	1	0	0	0
FBgn0086384	277.241	0.433571	1.35057	0.201788	2.14864	0.031663	0.0766708	Mer	0	0	1	1	1	0	0	0
FBgn0259152	1260.47	0.346278	1.27128	0.159985	2.16444	0.0304302	0.0741983	Clbn	1	0	1	1	1	1	0	0
FBgn0262127	361.904	-0.49642	0.708864	0.227702	-2.18013	0.0292479	0.0718144	kibra	0	0	1	1	1	0	0	0
FBgn0051832	27.4269	-1.05772	0.480391	0.472619	-2.23799	0.0252214	0.0637013	CG31832	0	0	1	1	1	0	0	0
FBgn0037007	1205.36	0.427385	1.34479	0.190916	2.2386	0.0251818	0.0636345	CG5059	1	0	1	1	1	0	0	0
FBgn0033238	2702.81	-0.470593	0.721668	0.20769	-2.26585	0.0234608	0.0600465	azot	0	0	1	1	1	0	0	0
FBgn0261722	956.801	0.436665	1.35347	0.188761	2.31332	0.0207053	0.0542535	fwe	0	0	1	1	1	0	0	0
FBgn0266052	277.348	5.70766	52.261	0.465024	12.2739	1.25049e-34	1.87612e-32	lncRNA:CR44817	0	0	0	0	0	0	0	0
FBgn0052010	10.1246	5.7045	52.1466	1.40175	4.06956	4.71022e-05	0.000272773	CR32010	0	0	0	0	0	0	0	0
FBgn0267949	56.0664	5.69234	51.7088	0.666483	8.54086	1.3323e-17	4.47782e-16	lncRNA:CR46229	0	0	0	0	0	0	0	0
FBgn0038851	83.835	5.67445	51.0715	0.56207	10.0956	5.7759e-24	3.51701e-22	dmrt93B	0	0	0	0	0	0	0	0
FBgn0266893	55.3125	5.67129	50.9598	0.672281	8.43589	3.28705e-17	1.07017e-15	lncRNA:CR45353	0	0	0	0	0	0	0	0
FBgn0267032	4.98337	5.66257	50.6528	1.55353	3.64497	0.000267424	0.001284	lncRNA:CR45476	0	0	0	0	0	0	0	0
FBgn0266891	177.753	5.65789	50.4888	0.808621	6.99696	2.61572e-12	4.84307e-11	lncRNA:CR45351	0	0	0	0	0	0	0	0
FBgn0267565	18.4637	5.65723	50.4658	1.18371	4.77924	1.7596e-06	1.39322e-05	lncRNA:CR45905	0	0	0	0	0	0	0	0
FBgn0026397	72.5141	5.64419	50.0115	0.577981	9.76535	1.58566e-22	8.57846e-21	Or22b	0	0	0	0	0	0	0	0
FBgn0267741	4.88749	5.63208	49.5934	1.53605	3.66661	0.000245791	0.00119233	CR46072	0	0	0	0	0	0	0	0
FBgn0040279	9.62803	5.6231	49.286	1.37581	4.08711	4.36781e-05	0.000255075	Osi14	0	0	0	0	0	0	0	0
FBgn0264553	336.261	5.60401	48.638	0.450006	12.4532	1.3434e-35	2.30006e-33	lncRNA:CR43932	0	0	0	0	0	0	0	0
FBgn0265907	206.04	5.60213	48.5746	0.755849	7.41171	1.24681e-13	2.68812e-12	lncRNA:CR44696	0	0	0	0	0	0	0	0
FBgn0265000	273.588	5.59705	48.404	0.450959	12.4115	2.26486e-35	3.74551e-33	lncRNA:CR44151	0	0	0	0	0	0	0	0
FBgn0266909	4.73123	5.58564	48.0227	1.59881	3.49363	0.000476494	0.00212191	lncRNA:CR45369	0	0	0	0	0	0	0	0
FBgn0265375	51.6234	5.57582	47.6968	0.679076	8.21089	2.19547e-16	6.54726e-15	lncRNA:CR44316	0	0	0	0	0	0	0	0
FBgn0266329	99.5628	5.51384	45.6912	0.494587	11.1484	7.29206e-29	6.35457e-27	lncRNA:CR44994	0	0	0	0	0	0	0	0
FBgn0028944	944.082	5.49817	45.1976	0.695409	7.90639	2.64966e-15	7.10139e-14	Semp1	0	0	0	0	0	0	0	0
FBgn0264987	106.141	5.48369	44.7461	0.47098	11.6431	2.48665e-31	2.68061e-29	lncRNA:CR44138	0	0	0	0	0	0	0	0
FBgn0264338	71.9275	5.45542	43.8777	0.68221	7.99669	1.27813e-15	3.54298e-14	lncRNA:CR43794	0	0	0	0	0	0	0	0
FBgn0261059	2883.41	5.45282	43.7988	0.677073	8.05352	8.04449e-16	2.28655e-14	Sfp78E	0	0	0	0	0	0	0	0
FBgn0264349	613.621	5.44989	43.7098	0.635379	8.57738	9.70604e-18	3.30801e-16	lncRNA:CR43805	0	0	0	0	0	0	0	0
FBgn0266045	8.57577	5.44921	43.6892	1.39572	3.90422	9.45294e-05	0.000511598	lncRNA:CR44810	0	0	0	0	0	0	0	0
FBgn0262170	96.1201	5.44429	43.5406	0.609181	8.93706	3.99651e-19	1.60666e-17	CG42878	0	0	0	0	0	0	0	0
FBgn0263322	4.26077	5.43431	43.2404	1.62157	3.35126	0.000804434	0.00337084	CG43403	0	0	0	0	0	0	0	0
FBgn0259973	2177.91	5.42793	43.0498	0.709758	7.64758	2.04794e-14	4.82259e-13	Sfp79B	0	0	0	0	0	0	0	0
FBgn0262140	286.701	5.42651	43.0074	0.748746	7.24747	4.24638e-13	8.64302e-12	CG42866	0	0	0	0	0	0	0	0
FBgn0266363	3437.39	5.41774	42.7465	0.645743	8.38992	4.86478e-17	1.53907e-15	CG45011	0	0	0	0	0	0	0	0
FBgn0031533	434.92	5.41197	42.576	0.25679	21.0755	1.33599e-98	2.43034e-95	CG2772	0	0	0	0	0	0	0	0
FBgn0022700	91.9318	5.39997	42.2235	0.611595	8.82934	1.05298e-18	3.96995e-17	Cht4	0	0	0	0	0	0	0	0
FBgn0259965	1855.29	5.32303	40.0306	0.728156	7.31029	2.66571e-13	5.52623e-12	Sfp35C	0	0	0	0	0	0	0	0
FBgn0266364	125.589	5.30911	39.6461	0.906804	5.85475	4.77728e-09	5.84725e-08	CG45012	0	0	0	0	0	0	0	0
FBgn0264342	341.946	5.30895	39.6418	0.415212	12.7861	1.96032e-37	3.52204e-35	CG43798	0	0	0	0	0	0	0	0
FBgn0262359	1633.09	5.30615	39.565	0.705954	7.51628	5.63554e-14	1.26565e-12	CG43057	0	0	0	0	0	0	0	0
FBgn0264379	7.76884	5.30421	39.5119	1.44698	3.66573	0.000246639	0.00119541	lncRNA:CR43831	0	0	0	0	0	0	0	0
FBgn0264564	115.911	5.2952	39.2657	0.591196	8.95676	3.34373e-19	1.36689e-17	asRNA:CR43936	0	0	0	0	0	0	0	0
FBgn0286869	64.3861	5.28605	39.0175	0.632169	8.36177	6.17851e-17	1.94623e-15	lncRNA:CR46391	0	0	0	0	0	0	0	0
FBgn0263709	56.7168	5.27851	38.8142	0.648177	8.14362	3.83618e-16	1.11433e-14	lncRNA:CR43661	0	0	0	0	0	0	0	0
FBgn0266213	135.61	5.27706	38.7752	0.529315	9.9696	2.07061e-23	1.20534e-21	lncRNA:CR44908	0	0	0	0	0	0	0	0
FBgn0032868	6258.59	5.2492	38.0335	0.786722	6.67224	2.51927e-11	4.10558e-10	CG17472	0	0	0	0	0	0	0	0
FBgn0030590	222.038	5.24496	37.9219	0.344216	15.2374	1.99696e-52	6.91946e-50	CG9518	0	0	0	0	0	1	0	0
FBgn0037870	7.3787	5.23231	37.5909	1.40961	3.71188	0.000205727	0.00101654	CG18577	0	0	0	0	0	0	0	0
FBgn0265898	27.4105	5.23088	37.5537	0.846564	6.17896	6.45267e-10	8.81743e-09	lncRNA:CR44687	0	0	0	0	0	0	0	0
FBgn0287605	20.5098	5.23072	37.5495	0.960162	5.44775	5.10118e-08	5.26506e-07	lncRNA:CR46474	0	0	0	0	0	0	0	0
FBgn0034471	91.3981	5.22779	37.4732	1.11656	4.68204	2.84037e-06	2.16672e-05	Obp56e	0	0	0	0	0	0	0	0
FBgn0265539	8251.82	5.22239	37.3333	0.727836	7.17523	7.21845e-13	1.43511e-11	lncRNA:CR44389	0	0	0	0	0	0	0	0
FBgn0266365	880.797	5.22208	37.3253	0.672407	7.76625	8.08441e-15	2.02152e-13	lncRNA:CR45013	0	0	0	0	0	0	0	0
FBgn0263501	41.3178	5.2205	37.2845	0.785077	6.64967	2.93751e-11	4.74468e-10	lncRNA:CR43490	0	0	0	0	0	0	0	0
FBgn0085420	235.82	5.20278	36.8293	0.319349	16.2919	1.1274e-59	5.29261e-57	DIP-delta	0	0	0	0	0	0	0	0
FBgn0051515	1012.2	5.19937	36.7422	0.57132	9.10062	8.98145e-20	3.78861e-18	CG31515	0	0	0	0	0	0	0	0
FBgn0054033	1581.89	5.19896	36.7319	0.597626	8.69936	3.33763e-18	1.1905e-16	CG34033	0	0	0	0	0	0	0	0
FBgn0051016	528.28	5.1987	36.7252	0.395994	13.1282	2.26872e-39	4.65023e-37	CG31016	0	0	0	0	0	0	0	0
FBgn0267304	3.61635	5.19807	36.7092	1.64499	3.15994	0.00157802	0.00605936	lncRNA:CR45740	0	0	0	0	0	0	0	0
FBgn0259954	271.818	5.19408	36.6078	0.787158	6.59852	4.15289e-11	6.56211e-10	CG42464	0	0	0	0	0	0	0	0
FBgn0259959	867.042	5.18842	36.4645	0.688308	7.53793	4.77483e-14	1.08575e-12	Sfp26Ac	0	0	0	0	0	0	0	0
FBgn0052283	13.4465	5.18788	36.4508	1.19083	4.35653	1.32142e-05	8.68986e-05	Drsl3	0	0	0	0	0	0	0	0
FBgn0039237	7.16028	5.18704	36.4297	1.42262	3.64611	0.000266237	0.00127999	CG13640	0	0	0	0	0	0	0	0
FBgn0032788	3.57908	5.18517	36.3825	1.67412	3.09725	0.00195328	0.00731579	CG13084	0	0	0	0	0	0	0	0
FBgn0039599	1195.53	5.17972	36.2453	0.671638	7.71207	1.23792e-14	2.99758e-13	intr	0	0	0	0	0	0	0	0
FBgn0266790	33.0842	5.17852	36.2152	0.794279	6.51978	7.0412e-11	1.07977e-09	lncRNA:CR45255	0	0	0	0	0	0	0	0
FBgn0266394	80.004	5.17846	36.2135	0.601981	8.60235	7.80999e-18	2.68697e-16	lncRNA:CR45034	0	0	0	0	0	0	0	0
FBgn0265674	7.11455	5.17214	36.0552	1.54374	3.3504	0.000806954	0.00337945	lncRNA:CR44481	0	0	0	0	0	0	0	0
FBgn0032860	46.2975	5.16235	35.8114	0.792744	6.512	7.41561e-11	1.13599e-09	CG15130	0	0	0	0	0	0	0	0
FBgn0267042	6.97038	5.15118	35.5353	1.42232	3.62167	0.000292712	0.00138847	CG45486	0	0	0	0	0	0	0	0
FBgn0004414	35580.1	5.12932	35.0009	0.646201	7.93766	2.06028e-15	5.59388e-14	msopa	0	0	0	0	0	0	0	0
FBgn0262623	62831.8	5.12749	34.9566	0.643509	7.96802	1.61242e-15	4.41912e-14	CG43147	0	0	0	0	0	0	0	0
FBgn0035281	50.4706	5.12248	34.8353	0.629106	8.14248	3.87264e-16	1.12268e-14	Cpr62Bc	0	0	0	0	0	0	0	0
FBgn0266788	288.915	5.10956	34.5248	0.704088	7.25699	3.95797e-13	8.10132e-12	lncRNA:CR45253	0	0	0	0	0	0	0	0
FBgn0032631	18.986	5.10949	34.5231	0.974764	5.24177	1.59041e-07	1.51474e-06	CG15140	0	0	0	0	0	0	0	0
FBgn0003339	3.37762	5.10412	34.3948	1.66281	3.06957	0.00214367	0.00791196	Scr	0	0	0	0	0	0	0	0
FBgn0034768	31.461	5.10242	34.3543	0.835826	6.10465	1.03029e-09	1.3781e-08	Obp58b	0	0	0	0	0	0	0	0
FBgn0050413	12.3952	5.08145	33.8587	1.18071	4.30375	1.67935e-05	0.000107332	CG30413	0	0	0	0	0	0	0	0
FBgn0039784	85.7205	5.06184	33.4015	0.550226	9.19958	3.59361e-20	1.61413e-18	CG9698	0	0	0	0	0	0	0	0
FBgn0011669	92407.5	5.06012	33.3616	0.697587	7.25374	4.05414e-13	8.27488e-12	Mst57Db	0	0	0	0	0	0	0	0
FBgn0000355	165.059	5.05528	33.25	0.355472	14.2213	6.75579e-46	1.78758e-43	Cp15	0	0	0	0	0	0	0	0
FBgn0265909	6.49993	5.04802	33.0831	1.43285	3.52307	0.000426585	0.00191886	lncRNA:CR44698	0	0	0	0	0	0	0	0
FBgn0265939	115.97	5.04068	32.9151	0.534451	9.4315	4.04258e-21	1.93525e-19	lncRNA:CR44726	0	0	0	0	0	0	0	0
FBgn0265689	352.037	5.03917	32.8808	0.411729	12.2391	1.92245e-34	2.74288e-32	lncRNA:CR44496	0	0	0	0	0	0	0	0
FBgn0053325	711.601	5.02678	32.5995	0.621251	8.09138	5.89933e-16	1.69002e-14	CG33325	0	0	0	0	0	0	0	0
FBgn0038983	133.231	5.02678	32.5994	0.510462	9.8475	7.02721e-23	3.94853e-21	CG5326	0	0	0	0	0	0	0	0
FBgn0054057	465.177	4.99599	31.9112	0.376638	13.2647	3.70879e-40	7.93735e-38	CG34057	0	0	0	0	0	0	0	0
FBgn0053723	170.322	4.9948	31.8849	0.360643	13.8497	1.27749e-43	3.09855e-41	CG33723	0	0	0	0	0	0	0	0
FBgn0051944	3.09446	4.97622	31.4769	1.68811	2.9478	0.0032004	0.0112176	tRNA:Gln-CTG-2-3	0	0	0	0	0	0	0	0
FBgn0261041	583.835	4.97005	31.3424	0.245603	20.2361	4.70869e-91	5.71046e-88	stj	0	0	0	0	0	0	1	0
FBgn0085307	6.17289	4.96306	31.1911	1.44978	3.42332	0.000618618	0.00267859	CG34278	0	0	0	0	0	0	0	0
FBgn0043533	3030.66	4.94799	30.867	0.5703	8.67613	4.0948e-18	1.4429e-16	Obp56f	0	0	0	0	0	0	0	0
FBgn0265579	96.3666	4.93853	30.6652	0.559829	8.8215	1.12941e-18	4.24709e-17	CG44406	0	0	0	0	0	0	0	0
FBgn0039771	16.7935	4.92452	30.3688	1.01124	4.86976	1.11735e-06	9.17133e-06	Osi23	0	0	0	0	0	0	0	0
FBgn0263023	742.923	4.92249	30.3262	0.22867	21.5266	8.7793e-103	1.82522e-99	CG43318	0	0	0	0	0	0	0	0
FBgn0263410	387.423	4.92107	30.2962	0.402606	12.223	2.34229e-34	3.30945e-32	lncRNA:CR43456	0	0	0	0	0	0	0	0
FBgn0039782	1943.47	4.921	30.2949	0.563516	8.73267	2.48723e-18	8.91543e-17	CG15539	0	0	0	0	0	0	0	0
FBgn0262010	1463.38	4.92004	30.2748	0.240678	20.4424	7.01735e-93	1.13471e-89	CG42828	0	0	0	0	0	0	0	0
FBgn0263337	229.701	4.91812	30.2344	0.416206	11.8165	3.20605e-32	3.7933e-30	lncRNA:CR43418	0	0	0	0	0	0	0	0
FBgn0030297	2.9409	4.90266	29.9122	1.73188	2.83083	0.00464279	0.015398	Gr10b	0	0	0	0	0	0	0	0
FBgn0265741	38.9159	4.90091	29.8759	0.750049	6.53412	6.39856e-11	9.87469e-10	lncRNA:CR44548	0	0	0	0	0	0	0	0
FBgn0035068	54.692	4.88904	29.631	0.547949	8.92242	4.5619e-19	1.81665e-17	CG12849	0	0	0	0	0	0	0	0
FBgn0250831	5515.82	4.8886	29.6221	0.618376	7.90555	2.66761e-15	7.13634e-14	BG642167	0	0	0	0	0	0	0	0
FBgn0051680	2708.17	4.88671	29.5834	0.683261	7.15204	8.54961e-13	1.67685e-11	CG31680	0	0	0	0	0	0	0	0
FBgn0259961	995.879	4.88456	29.5392	0.609757	8.01067	1.14088e-15	3.19909e-14	CG42471	0	0	0	0	0	0	0	0
FBgn0266040	296.576	4.87989	29.4437	0.693137	7.04029	1.91841e-12	3.62579e-11	lncRNA:CR44805	0	0	0	0	0	0	0	0
FBgn0267037	5.76223	4.86446	29.1305	1.4504	3.35388	0.000796872	0.00334108	asRNA:CR45481	0	0	0	0	0	0	0	0
FBgn0031064	26.6051	4.86444	29.1302	0.786819	6.18242	6.31264e-10	8.65045e-09	CG12531	0	0	0	0	0	0	0	0
FBgn0034553	2.85648	4.85653	28.9709	1.8072	2.68732	0.00720277	0.0224747	CG9993	0	0	0	0	0	0	0	0
FBgn0039616	2369.81	4.84689	28.7779	0.626154	7.74074	9.88433e-15	2.44222e-13	CG11828	0	0	0	0	0	0	0	0
FBgn0266642	47.6993	4.83702	28.5818	0.73753	6.55841	5.43836e-11	8.41962e-10	asRNA:CR45149	0	0	0	0	0	0	0	0
FBgn0259962	795.834	4.83678	28.577	0.650558	7.43482	1.04707e-13	2.29143e-12	Sfp33A1	0	0	0	0	0	0	0	0
FBgn0265795	163.529	4.83411	28.5241	0.360643	13.4042	5.71638e-41	1.29985e-38	lncRNA:CR44584	0	0	0	0	0	0	0	0
FBgn0039704	235.585	4.82691	28.382	0.283765	17.0102	6.89996e-65	4.01661e-62	neo	0	0	0	0	0	0	0	0
FBgn0037498	2166.97	4.81822	28.2117	0.5608	8.59169	8.56989e-18	2.93453e-16	CG10029	0	0	0	0	0	0	0	0
FBgn0262961	2492.25	4.81554	28.1592	0.666131	7.22911	4.86153e-13	9.81274e-12	CG43272	0	0	0	0	0	0	0	0
FBgn0265163	135.247	4.81519	28.1525	0.517568	9.3035	1.35903e-20	6.2391e-19	lncRNA:CR44232	0	0	0	0	0	0	0	0
FBgn0032336	2.76423	4.81493	28.1475	1.75981	2.73606	0.00621806	0.0198055	AstC	0	0	0	0	0	0	0	0
FBgn0259964	6820.87	4.81436	28.1363	0.692706	6.95007	3.65097e-12	6.67494e-11	Sfp33A3	0	0	0	0	0	0	0	0
FBgn0085285	471.275	4.81141	28.0789	0.389101	12.3654	4.0198e-35	6.50001e-33	CG34256	0	0	0	0	0	0	0	0
FBgn0263082	679.324	4.80706	27.9942	0.374655	12.8306	1.10488e-37	2.0708e-35	CG43350	0	0	0	0	0	0	0	0
FBgn0262358	176.782	4.8008	27.8731	0.473338	10.1424	3.58081e-24	2.1988e-22	CG43056	0	0	0	0	0	0	0	0
FBgn0051810	2.7332	4.80073	27.8718	1.76995	2.71235	0.00668077	0.0210855	CG31810	0	0	0	0	0	0	0	0
FBgn0043539	1689.42	4.7955	27.7708	0.607411	7.89498	2.90367e-15	7.7394e-14	Obp22a	0	0	0	0	0	0	0	0
FBgn0085328	896.509	4.78513	27.572	0.722206	6.62572	3.4557e-11	5.52646e-10	CG34299	0	0	0	0	0	0	0	0
FBgn0051493	1093.8	4.78372	27.545	0.552658	8.65584	4.89292e-18	1.70351e-16	CG31493	0	0	0	0	0	0	0	0
FBgn0031700	133.428	4.77788	27.4338	0.522744	9.14	6.24544e-20	2.69703e-18	CG14022	0	0	0	0	0	0	0	0
FBgn0265957	531.627	4.77278	27.337	0.599266	7.96438	1.66057e-15	4.54252e-14	lncRNA:CR44744	0	0	0	0	0	0	0	0
FBgn0262814	920.435	4.76516	27.193	0.633706	7.51952	5.49768e-14	1.23851e-12	CG43185	0	0	0	0	0	0	0	0
FBgn0011668	45867.5	4.7634	27.1598	0.616729	7.72365	1.13041e-14	2.77418e-13	Mst57Da	0	0	0	0	0	0	0	0
FBgn0002735	2.67543	4.76299	27.1521	1.76337	2.70108	0.00691156	0.021701	E(spl)mgamma-HLH	0	0	0	0	0	0	0	0
FBgn0259966	2495.03	4.76126	27.1196	0.594772	8.00519	1.1928e-15	3.32544e-14	Sfp51E	0	0	0	0	0	0	0	0
FBgn0035813	5.33707	4.75225	26.9507	1.49116	3.18694	0.00143784	0.00559191	CG8492	0	0	0	0	0	0	0	0
FBgn0031273	308.232	4.75027	26.9136	0.690718	6.87729	6.10014e-12	1.08131e-10	CG2839	0	0	0	0	0	0	0	0
FBgn0259971	19783.5	4.74573	26.8291	0.708136	6.70171	2.05989e-11	3.39882e-10	CG42481	0	0	0	0	0	0	0	0
FBgn0263249	4995.11	4.7441	26.7989	0.698517	6.79168	1.10838e-11	1.891e-10	CG43392	0	0	0	0	0	0	0	0
FBgn0034552	2.63108	4.74216	26.7628	1.75947	2.69523	0.00703411	0.022024	CG17999	0	0	0	0	0	0	0	0
FBgn0263502	168.891	4.74002	26.7232	0.447353	10.5957	3.11975e-26	2.24761e-24	lncRNA:CR43491	0	0	0	0	0	0	0	0
FBgn0036391	227.942	4.73807	26.6871	0.302314	15.6727	2.32499e-55	8.9041e-53	CG17364	0	0	0	0	0	0	0	0
FBgn0041623	2.60713	4.73078	26.5525	1.7705	2.672	0.00753996	0.0233466	Or65c	0	0	0	0	0	0	0	0
FBgn0266588	530.77	4.72965	26.5318	0.823243	5.74514	9.18429e-09	1.07529e-07	lncRNA:CR45113	0	0	0	0	0	0	0	0
FBgn0261061	935.675	4.72519	26.4498	0.957039	4.9373	7.92115e-07	6.71384e-06	Sfp96F	0	0	0	0	0	0	0	0
FBgn0263326	159.651	4.7248	26.4428	0.839535	5.62788	1.82435e-08	2.05335e-07	CG43407	0	0	0	0	0	0	0	0
FBgn0266827	5.24557	4.72396	26.4274	1.50154	3.14607	0.00165482	0.00632446	lncRNA:CR45289	0	0	0	0	0	0	0	0
FBgn0033301	43.9305	4.72081	26.3698	0.607631	7.76922	7.8974e-15	1.97816e-13	CG12780	0	0	0	0	0	0	0	0
FBgn0011581	354.972	4.71706	26.3013	0.669773	7.04278	1.8844e-12	3.56615e-11	Ms	0	0	0	0	0	0	0	0
FBgn0266451	2.5734	4.71414	26.248	1.84842	2.55036	0.0107613	0.0315362	fau	0	0	0	0	0	0	0	0
FBgn0261861	406.989	4.71008	26.1744	0.633926	7.43002	1.08579e-13	2.36195e-12	lncRNA:CR42790	0	0	0	0	0	0	0	0
FBgn0265270	3886.77	4.70729	26.1238	0.736279	6.39336	1.62281e-10	2.4148e-09	lncRNA:CR43239	0	0	0	0	0	0	0	0
FBgn0036154	2892.38	4.70541	26.0898	0.563841	8.34528	7.10467e-17	2.22353e-15	CG6168	0	0	0	0	0	0	0	0
FBgn0033145	756.208	4.70326	26.0508	0.704889	6.67234	2.51752e-11	4.10558e-10	CG12828	0	0	0	0	0	0	0	0
FBgn0040250	5.17158	4.70163	26.0215	1.53169	3.06957	0.00214367	0.00791196	Ugt304A1	0	0	0	0	0	0	0	0
FBgn0265908	2.54237	4.69825	25.9605	1.90417	2.46734	0.0136119	0.0383755	lncRNA:CR44697	0	0	0	0	0	0	0	0
FBgn0267542	140.804	4.6948	25.8985	0.527165	8.90574	5.30318e-19	2.08025e-17	asRNA:CR45882	0	0	0	0	0	0	0	0
FBgn0051902	778.325	4.69428	25.8893	0.571619	8.21226	2.17067e-16	6.4866e-15	Spn28Da	0	0	0	0	0	0	0	0
FBgn0263867	77.5099	4.69393	25.883	0.56265	8.34255	7.27082e-17	2.27065e-15	lncRNA:CR43714	0	0	0	0	0	0	0	0
FBgn0263091	23.8235	4.6909	25.8286	0.786311	5.9657	2.43587e-09	3.08791e-08	CR43359	0	0	0	0	0	0	0	0
FBgn0264330	655.822	4.68781	25.7734	0.746325	6.2812	3.35975e-10	4.74243e-09	CG43789	0	0	0	0	0	0	0	0
FBgn0265665	201.887	4.68403	25.7059	0.451177	10.3818	3.00096e-25	1.97616e-23	lncRNA:CR44472	0	0	0	0	0	0	0	0
FBgn0015584	31673.8	4.68007	25.6355	0.619951	7.54909	4.38309e-14	1.00101e-12	Acp53Ea	0	0	0	0	0	0	0	0
FBgn0038986	345.028	4.67278	25.5063	0.383378	12.1884	3.58199e-34	4.96464e-32	sit	0	0	0	0	0	0	0	0
FBgn0036529	197.84	4.67227	25.4973	0.38271	12.2084	2.8041e-34	3.92385e-32	Pgant8	0	0	0	0	0	0	0	0
FBgn0017561	71.0858	4.66847	25.4303	0.509805	9.15737	5.31773e-20	2.33803e-18	Ork1	0	0	0	0	0	0	0	0
FBgn0267709	305.698	4.66628	25.3916	0.402411	11.5958	4.32792e-31	4.55392e-29	CG46042	0	0	0	0	0	0	0	0
FBgn0033592	41.3895	4.66477	25.365	0.733241	6.36185	1.99337e-10	2.93618e-09	CG13215	0	0	0	0	0	0	0	0
FBgn0264842	18.8405	4.66441	25.3588	0.952109	4.89904	9.63082e-07	8.03193e-06	lncRNA:CR44050	0	0	0	0	0	0	0	0
FBgn0266885	2.49522	4.66441	25.3587	1.86452	2.50167	0.012361	0.0354178	lncRNA:CR45346	0	0	0	0	0	0	0	0
FBgn0032080	373.787	4.66037	25.2877	0.396227	11.7619	6.13678e-32	6.97723e-30	CG9525	0	0	0	0	0	0	0	0
FBgn0036527	589.794	4.65964	25.2751	0.377046	12.3583	4.39378e-35	7.02667e-33	CG7304	0	0	0	0	0	0	0	0
FBgn0264518	140.685	4.65064	25.1179	0.509524	9.12743	7.01446e-20	2.98484e-18	lncRNA:CR43917	0	0	0	0	0	0	0	0
FBgn0262622	195.775	4.65025	25.1111	0.401044	11.5954	4.34959e-31	4.55392e-29	lncRNA:CR43146	0	0	0	0	0	0	0	0
FBgn0030148	37.1057	4.64645	25.0449	0.620122	7.49279	6.74254e-14	1.50497e-12	CG3106	0	0	0	0	0	0	0	0
FBgn0259956	1400.75	4.6398	24.9298	0.64836	7.15621	8.29391e-13	1.6311e-11	Sfp24C1	0	0	0	0	0	0	0	0
FBgn0037782	27.9478	4.6372	24.885	0.766314	6.05131	1.43673e-09	1.88198e-08	Npc2d	0	0	0	0	0	0	0	0
FBgn0263743	41.5977	4.63571	24.8592	0.605609	7.65462	1.9389e-14	4.59556e-13	CG43668	0	0	0	0	0	0	0	0
FBgn0003411	831.061	4.62703	24.7101	0.305806	15.1306	1.01761e-51	3.444e-49	sisA	0	0	0	0	0	0	0	0
FBgn0034415	2081	4.62095	24.6062	0.617259	7.48625	7.08713e-14	1.57034e-12	CG15116	0	0	0	0	0	0	0	0
FBgn0287216	36.3927	4.61737	24.5453	0.702999	6.56811	5.09576e-11	7.93989e-10	lncRNA:CR46446	0	0	0	0	0	0	0	0
FBgn0039779	4.87071	4.61103	24.4377	1.50003	3.07396	0.00211235	0.00782415	PH4alphaSG2	0	0	0	0	0	0	0	0
FBgn0262365	700.725	4.60591	24.3511	0.686787	6.70647	1.99395e-11	3.29375e-10	CG43063	0	0	0	0	0	0	0	0
FBgn0034152	36150	4.60534	24.3413	0.599109	7.68697	1.5066e-14	3.61807e-13	Acp53C14a	0	0	0	0	0	0	0	0
FBgn0030367	72.2471	4.60304	24.3027	0.523009	8.80107	1.35519e-18	5.03115e-17	Cyp311a1	0	0	0	0	0	0	0	0
FBgn0265750	201.902	4.60246	24.2928	0.797951	5.76784	8.02947e-09	9.5157e-08	lncRNA:CR44557	0	0	0	0	0	0	0	0
FBgn0261860	2223.85	4.60143	24.2755	0.596276	7.71695	1.19147e-14	2.89958e-13	CG42789	0	0	0	0	0	0	0	0
FBgn0011670	11213	4.59818	24.2209	0.580991	7.91437	2.48501e-15	6.6724e-14	Mst57Dc	0	0	0	0	0	0	0	0
FBgn0265165	62.5414	4.59341	24.141	0.606683	7.57135	3.69361e-14	8.49179e-13	lncRNA:CR44234	0	0	0	0	0	0	0	0
FBgn0029863	71.4658	4.58832	24.0559	0.518039	8.8571	8.21252e-19	3.12871e-17	CG3823	0	0	0	0	0	0	0	0
FBgn0039378	516.074	4.58547	24.0085	0.39586	11.5836	4.99137e-31	5.15173e-29	alpha4GT2	0	0	0	0	0	0	0	0
FBgn0083965	1890.62	4.58543	24.0078	0.564498	8.12302	4.54741e-16	1.31046e-14	CG34129	0	0	0	0	0	0	0	0
FBgn0264083	276.014	4.58453	23.9928	0.728437	6.29365	3.10089e-10	4.43293e-09	lncRNA:CR43752	0	0	0	0	0	0	0	0
FBgn0034153	36116.2	4.58126	23.9384	0.616679	7.42891	1.09493e-13	2.37829e-12	Acp53C14b	0	0	0	0	0	0	0	0
FBgn0263760	13.3214	4.58057	23.9271	1.01297	4.52193	6.12771e-06	4.32896e-05	CG43677	0	0	0	0	0	0	0	0
FBgn0030339	523.824	4.56967	23.7469	0.637602	7.16696	7.66838e-13	1.51628e-11	Cyp28c1	0	0	0	0	0	0	0	0
FBgn0020509	25972.8	4.56808	23.7207	0.614987	7.42792	1.1032e-13	2.39268e-12	Acp62F	0	0	0	0	0	0	0	0
FBgn0038700	39.3087	4.55148	23.4494	0.640966	7.10097	1.23885e-12	2.38479e-11	CG3734	0	0	0	0	0	0	0	0
FBgn0265164	13.2026	4.55085	23.4391	1.12049	4.06148	4.8763e-05	0.00028183	lncRNA:CR44233	0	0	0	0	0	0	0	0
FBgn0267257	39.079	4.54859	23.4025	0.592061	7.68264	1.55848e-14	3.73651e-13	lncRNA:CR45693	0	0	0	0	0	0	0	0
FBgn0266366	26.0933	4.54696	23.376	0.829045	5.48457	4.14477e-08	4.35201e-07	lncRNA:CR45014	0	0	0	0	0	0	0	0
FBgn0039597	5142.61	4.54368	23.323	0.610211	7.44608	9.61531e-14	2.1074e-12	CG9997	0	0	0	0	0	0	0	0
FBgn0037039	602.061	4.54258	23.3052	0.61484	7.38823	1.48798e-13	3.17982e-12	CG10587	0	0	0	0	0	0	0	0
FBgn0264843	480.659	4.53706	23.2163	0.797433	5.68959	1.27347e-08	1.46273e-07	lncRNA:CR44051	0	0	0	0	0	0	0	0
FBgn0085784	2.26982	4.53332	23.156	1.88227	2.40843	0.0160214	0.0439675	CR41379	0	0	0	0	0	0	0	0
FBgn0051105	2111.48	4.52256	22.984	0.594033	7.61332	2.67148e-14	6.24045e-13	ppk22	0	0	0	0	0	0	0	0
FBgn0031409	586.95	4.52001	22.9434	0.614427	7.35646	1.88858e-13	3.98326e-12	CG4271	0	0	0	0	0	0	0	0
FBgn0262099	13129.6	4.51545	22.8711	0.643005	7.02242	2.18053e-12	4.07358e-11	CG42852	0	0	0	0	0	0	0	0
FBgn0034154	416.665	4.51194	22.8155	0.387284	11.6502	2.28876e-31	2.50438e-29	CG5267	0	0	0	0	0	0	0	0
FBgn0267655	59.3744	4.51152	22.8089	0.599892	7.52056	5.45431e-14	1.23065e-12	lncRNA:CR45993	0	0	0	0	0	0	0	0
FBgn0264565	143.153	4.50625	22.7256	0.493128	9.13809	6.35643e-20	2.7367e-18	lncRNA:CR43937	0	0	0	0	0	0	0	0
FBgn0265202	25.3132	4.49518	22.552	0.758888	5.92338	3.15394e-09	3.95684e-08	lncRNA:CR44262	0	0	0	0	0	0	0	0
FBgn0261568	382.289	4.49516	22.5517	0.411753	10.9171	9.54671e-28	7.63369e-26	CG42682	0	0	0	0	0	0	0	0
FBgn0003034	8601.52	4.49006	22.4721	0.719441	6.24105	4.34656e-10	6.05896e-09	SP	0	0	0	0	0	0	0	0
FBgn0259974	1136.37	4.4881	22.4416	0.616246	7.28297	3.26547e-13	6.75034e-12	Sfp84E	0	0	0	0	0	0	0	0
FBgn0265702	46.2367	4.48807	22.4412	0.690484	6.49989	8.03771e-11	1.22229e-09	asRNA:CR44509	0	0	0	0	0	0	0	0
FBgn0062961	16.6693	4.47981	22.3129	0.974286	4.59804	4.26484e-06	3.12833e-05	lncRNA:CR33942	0	0	0	0	0	0	0	0
FBgn0262006	219.879	4.47841	22.2914	0.785772	5.69938	1.20247e-08	1.38555e-07	CG42824	0	0	0	0	0	0	0	0
FBgn0043825	12302.3	4.47157	22.1858	0.78263	5.71351	1.10667e-08	1.28227e-07	CG18284	0	0	0	0	0	0	0	0
FBgn0040098	5961.95	4.46931	22.1511	0.680052	6.57201	4.96415e-11	7.75975e-10	lectin-29Ca	0	0	0	0	0	0	0	0
FBgn0040628	598.34	4.45978	22.0054	0.35859	12.437	1.64548e-35	2.75249e-33	CAH16	0	0	0	0	0	0	0	0
FBgn0259972	1645.46	4.45448	21.9246	0.737117	6.04311	1.5117e-09	1.96778e-08	Sfp77F	0	0	0	0	0	0	0	0
FBgn0033164	1359.54	4.44975	21.8528	0.693814	6.41346	1.42258e-10	2.12992e-09	CG11112	0	0	0	0	0	0	0	0
FBgn0259958	2562.33	4.44821	21.8296	0.622962	7.14043	9.30422e-13	1.81507e-11	Sfp24F	0	0	0	0	0	0	0	0
FBgn0051524	1006.08	4.44713	21.8132	0.631879	7.03794	1.951e-12	3.68261e-11	CG31524	0	0	0	0	0	0	0	0
FBgn0038918	2198.7	4.44411	21.7677	0.62884	7.06716	1.58134e-12	3.00042e-11	Qsox3	0	0	0	0	0	0	0	0
FBgn0051021	2571.56	4.44248	21.743	0.58986	7.53141	5.01953e-14	1.13607e-12	CG31021	0	0	0	0	0	0	0	0
FBgn0039598	6464.49	4.4366	21.6546	0.546905	8.1122	4.97125e-16	1.42696e-14	aqrs	0	0	0	0	0	0	0	0
FBgn0032122	14515.5	4.43489	21.6289	0.720967	6.15131	7.68477e-10	1.03744e-08	CG31883	0	0	0	0	0	0	0	0
FBgn0259970	1849.8	4.43238	21.5913	0.82526	5.37089	7.8351e-08	7.84211e-07	Sfp70A4	0	0	0	0	0	0	0	0
FBgn0262963	12.1606	4.42929	21.5451	1.03272	4.28896	1.79509e-05	0.000113681	lncRNA:CR43274	0	0	0	0	0	0	0	0
FBgn0052382	1161.24	4.42578	21.4928	0.338045	13.0923	3.64549e-39	7.26751e-37	sphinx2	0	0	0	0	0	0	0	0
FBgn0037260	704.243	4.42319	21.4542	0.360733	12.2617	1.45488e-34	2.13868e-32	Mur82C	0	0	0	0	0	0	0	0
FBgn0036440	608.397	4.42315	21.4537	0.23352	18.9412	5.21623e-80	4.21732e-77	CG17177	0	0	0	0	0	0	0	0
FBgn0262999	238.416	4.42251	21.4442	0.454326	9.73422	2.15468e-22	1.14025e-20	CG43307	0	0	0	0	0	0	0	0
FBgn0015583	2560.07	4.41427	21.322	0.637378	6.92567	4.33923e-12	7.83484e-11	Acp29AB	0	0	0	0	0	0	0	0
FBgn0267260	11.9158	4.41365	21.3129	1.03104	4.28077	1.86251e-05	0.000117488	lncRNA:CR45696	0	0	0	0	0	0	0	0
FBgn0039783	2319.69	4.41218	21.2911	0.553498	7.97144	1.5683e-15	4.31446e-14	PH4alphaNE2	0	0	0	0	0	0	0	0
FBgn0085398	23.8884	4.40897	21.2438	0.732272	6.02095	1.73398e-09	2.23513e-08	ppk9	0	0	0	0	0	0	0	0
FBgn0052203	3463.33	4.40751	21.2223	0.760806	5.79321	6.90554e-09	8.2713e-08	Spn75F	0	0	0	0	0	0	0	0
FBgn0053530	3017.38	4.40583	21.1976	0.674611	6.53092	6.53678e-11	1.00773e-09	Acp53C14c	0	0	0	0	0	0	0	0
FBgn0028986	35918.2	4.40383	21.1683	0.562723	7.82593	5.03898e-15	1.30022e-13	Spn38F	0	0	0	0	0	0	0	0
FBgn0031065	232.223	4.39518	21.0418	0.744055	5.90707	3.48251e-09	4.34285e-08	CG14234	0	0	0	0	0	0	0	0
FBgn0032834	1707.07	4.38346	20.8715	0.557788	7.85865	3.88291e-15	1.01451e-13	CG13965	0	0	0	0	0	0	0	0
FBgn0054038	42.5993	4.37966	20.8166	0.687561	6.36986	1.89201e-10	2.79538e-09	CG34038	0	0	0	0	0	0	0	0
FBgn0036795	2142.6	4.37932	20.8117	0.554686	7.89513	2.90003e-15	7.7394e-14	CG18233	0	0	0	0	0	0	0	0
FBgn0038153	15.5509	4.37526	20.7532	0.956573	4.57389	4.78749e-06	3.47666e-05	Ir87a	0	0	0	0	0	0	0	0
FBgn0259969	3650.32	4.37269	20.7162	0.706534	6.18893	6.05741e-10	8.32422e-09	Sfp65A	0	0	0	0	0	0	0	0
FBgn0287669	69.4217	4.37225	20.7099	0.43526	10.0452	9.64965e-24	5.77907e-22	nan	0	0	0	0	0	0	0	0
FBgn0038136	1242.76	4.36729	20.6389	0.613665	7.11673	1.10514e-12	2.14156e-11	CG8774	0	0	0	0	0	0	0	0
FBgn0266636	4.14541	4.36583	20.618	1.58575	2.75316	0.00590232	0.0189324	asRNA:CR45143	0	0	0	0	0	0	0	0
FBgn0002856	4728.51	4.36355	20.5854	0.533916	8.17273	3.01491e-16	8.86383e-15	Acp26Ab	0	0	0	0	0	0	0	0
FBgn0034865	246.792	4.35933	20.5252	0.327174	13.3242	1.67486e-40	3.69307e-38	Or59b	0	0	0	0	0	0	0	0
FBgn0038451	284.168	4.34897	20.3784	0.692951	6.27601	3.47383e-10	4.88923e-09	CG14893	0	0	0	0	0	0	0	0
FBgn0265538	1148.93	4.3483	20.369	0.801405	5.42585	5.76786e-08	5.88224e-07	CG44388	0	0	0	0	0	0	0	0
FBgn0262564	139.829	4.34302	20.2946	0.473344	9.17519	4.50785e-20	1.994e-18	lncRNA:CR43104	0	0	0	0	0	0	0	0
FBgn0265667	18.9175	4.34121	20.2691	0.887755	4.8901	1.00785e-06	8.34378e-06	lncRNA:CR44474	0	0	0	0	0	0	0	0
FBgn0259967	1444.15	4.3364	20.2016	0.657474	6.59554	4.23711e-11	6.68067e-10	Sfp53D	0	0	0	0	0	0	0	0
FBgn0051418	2033.83	4.33285	20.1519	0.609329	7.11085	1.15329e-12	2.22892e-11	CG31418	0	0	0	0	0	0	0	0
FBgn0262571	1129.2	4.32718	20.0729	0.615482	7.03055	2.05721e-12	3.86803e-11	CG43111	0	0	0	0	0	0	0	0
FBgn0262899	1914.88	4.32491	20.0414	0.653275	6.62035	3.58354e-11	5.72462e-10	CG43254	0	0	0	0	0	0	0	0
FBgn0040097	8157.24	4.321	19.9872	0.714609	6.04667	1.47871e-09	1.92829e-08	lectin-30A	0	0	0	0	0	0	0	0
FBgn0002855	25488	4.32089	19.9856	0.832301	5.19149	2.08615e-07	1.94738e-06	Acp26Aa	0	0	0	0	0	0	0	0
FBgn0259963	379.04	4.31883	19.9571	0.39579	10.9119	1.01084e-27	7.99495e-26	Sfp33A2	0	0	0	0	0	0	0	0
FBgn0266308	94.3008	4.31557	19.912	0.549293	7.85659	3.94739e-15	1.0295e-13	lncRNA:CR44973	0	0	0	0	0	0	0	0
FBgn0264714	11.2403	4.309	19.8216	1.08414	3.9746	7.04984e-05	0.000392788	CG43982	0	0	0	0	0	0	0	0
FBgn0266738	78.7841	4.30612	19.782	0.600699	7.16851	7.58182e-13	1.5012e-11	lncRNA:CR45211	0	0	0	0	0	0	0	0
FBgn0015585	9155.65	4.30581	19.7777	0.708617	6.07635	1.22949e-09	1.63107e-08	Acp63F	0	0	0	0	0	0	0	0
FBgn0002734	25.9752	4.30414	19.7549	0.689202	6.24511	4.23512e-10	5.91495e-09	E(spl)mdelta-HLH	0	0	0	0	0	0	0	0
FBgn0265943	29.6881	4.30307	19.7403	0.645243	6.66892	2.57696e-11	4.18555e-10	lncRNA:CR44730	0	0	0	0	0	0	0	0
FBgn0044812	7.26286	4.30299	19.7392	1.29328	3.32718	0.000877285	0.00363839	TotC	0	0	0	0	0	0	0	0
FBgn0054041	1843.51	4.3003	19.7024	0.605311	7.10428	1.20951e-12	2.33139e-11	CG34041	0	0	0	0	0	0	0	0
FBgn0263411	161.558	4.29476	19.6268	0.477724	8.99004	2.47148e-19	1.01603e-17	lncRNA:CR43457	0	0	0	0	0	0	0	0
FBgn0038123	2757.61	4.28865	19.5439	0.149574	28.6724	8.43595e-181	1.22768e-176	CG8508	0	0	0	0	0	0	0	0
FBgn0027581	18.3212	4.28758	19.5294	0.819561	5.23156	1.68088e-07	1.59465e-06	CG6191	0	0	0	0	0	0	0	0
FBgn0261055	7702.07	4.28571	19.5041	0.642475	6.67062	2.5472e-11	4.14646e-10	Sfp26Ad	0	0	0	0	0	0	0	0
FBgn0028987	36198.7	4.28118	19.443	0.634976	6.74227	1.55935e-11	2.61141e-10	Spn28F	0	0	0	0	0	0	0	0
FBgn0262000	225.613	4.27322	19.3361	0.41255	10.3581	3.84638e-25	2.52146e-23	CG42818	0	0	0	0	0	0	0	0
FBgn0265204	61.6745	4.26697	19.2525	0.556148	7.67236	1.68861e-14	4.02858e-13	lncRNA:CR44264	0	0	0	0	0	0	0	0
FBgn0085476	1645.09	4.26297	19.1991	0.686773	6.20724	5.39223e-10	7.43821e-09	CG34447	0	0	0	0	0	0	0	0
FBgn0266594	7.13044	4.25822	19.136	1.34072	3.17607	0.00149285	0.00577652	lncRNA:CR45119	0	0	0	0	0	0	0	0
FBgn0264725	271.783	4.25602	19.1069	0.436263	9.75564	1.74498e-22	9.37479e-21	CG43993	0	0	0	0	0	0	0	0
FBgn0030643	420.935	4.25119	19.043	0.405738	10.4777	1.09401e-25	7.4747e-24	CG15641	0	0	0	0	0	0	0	0
FBgn0054051	4681.06	4.25082	19.0381	0.578729	7.34509	2.05625e-13	4.31191e-12	CG34051	0	0	0	0	0	0	0	0
FBgn0265062	293.16	4.24804	19.0014	0.781744	5.43405	5.50896e-08	5.65387e-07	lncRNA:CR44173	0	0	0	0	0	0	0	0
FBgn0016919	1087.45	4.24773	18.9973	0.582443	7.29295	3.03249e-13	6.27765e-12	nompB	0	0	0	0	0	0	0	0
FBgn0263024	2689.93	4.24558	18.9691	0.8788	4.83111	1.35773e-06	1.0959e-05	CG43319	0	0	0	0	0	0	0	0
FBgn0265694	107.381	4.24085	18.907	0.474984	8.92841	4.32164e-19	1.72782e-17	lncRNA:CR44501	0	0	0	0	0	0	0	0
FBgn0030074	3.7959	4.2285	18.7458	1.73025	2.44387	0.0145306	0.0405104	CG12662	0	0	0	0	0	0	0	0
FBgn0054002	933.443	4.22754	18.7334	0.641092	6.59428	4.27328e-11	6.73042e-10	CG34002	0	0	0	0	0	0	0	0
FBgn0265349	461.685	4.22752	18.7331	0.950211	4.44903	8.6259e-06	5.89355e-05	Sfp33A4	0	0	0	0	0	0	0	0
FBgn0266882	74.53	4.22472	18.6968	0.572851	7.3749	1.64463e-13	3.49407e-12	asRNA:CR45343	0	0	0	0	0	0	0	0
FBgn0037420	14.0694	4.22238	18.6665	0.912966	4.6249	3.74773e-06	2.78695e-05	CG15597	0	0	0	0	0	0	0	0
FBgn0030356	10591.4	4.21785	18.608	0.153745	27.434	1.07809e-165	7.84475e-162	lncRNA:CR32661	0	0	0	0	0	0	0	0
FBgn0036528	517.193	4.21754	18.6039	0.375522	11.2311	2.86769e-29	2.65818e-27	CG7579	0	0	0	0	0	0	0	0
FBgn0259955	818.792	4.21686	18.5953	0.623772	6.76026	1.37744e-11	2.32013e-10	CG42465	0	0	0	0	0	0	0	0
FBgn0036410	13.9499	4.21561	18.5791	0.934211	4.51248	6.40732e-06	4.50027e-05	CG8100	0	0	0	0	0	0	0	0
FBgn0083141	2031.45	4.21184	18.5307	0.607055	6.93816	3.97229e-12	7.20806e-11	Spn28B	0	0	0	0	0	0	0	0
FBgn0262688	6.97179	4.1963	18.3321	1.34406	3.12211	0.0017956	0.00679618	CR43158	0	0	0	0	0	0	0	0
FBgn0263089	54.5457	4.19088	18.2634	0.598208	7.00572	2.45714e-12	4.56107e-11	lncRNA:CR43357	0	0	0	0	0	0	0	0
FBgn0031472	543.619	4.18259	18.1587	0.360697	11.5959	4.32527e-31	4.55392e-29	CG2983	0	0	0	0	0	0	0	0
FBgn0266068	293.151	4.17721	18.0912	0.662096	6.30908	2.80702e-10	4.04462e-09	lncRNA:CR44821	0	0	0	0	0	0	0	0
FBgn0267024	13.653	4.17701	18.0886	1.03733	4.02671	5.6562e-05	0.000321884	asRNA:CR45468	0	0	0	0	0	0	0	0
FBgn0267563	71.3577	4.17696	18.088	0.496946	8.40526	4.26918e-17	1.36548e-15	lncRNA:CR45903	0	0	0	0	0	0	0	0
FBgn0261058	680.569	4.16878	17.9857	0.674391	6.18154	6.34778e-10	8.68226e-09	Sfp38D	0	0	0	0	0	0	0	0
FBgn0002732	3.63264	4.16839	17.9809	1.61333	2.58371	0.0097743	0.0291785	E(spl)malpha-BFM	0	0	0	0	0	0	0	0
FBgn0263235	6.79761	4.16733	17.9676	1.31416	3.17109	0.00151869	0.00586559	Phae2	0	0	0	0	0	0	0	0
FBgn0265295	3.62202	4.16438	17.9309	1.5837	2.62953	0.00855036	0.0260703	asRNA:CR42871	0	0	0	0	0	0	0	0
FBgn0051017	2275	4.1597	17.8729	0.339656	12.2468	1.74747e-34	2.51791e-32	PH4alphaNE3	0	0	0	0	0	0	0	0
FBgn0038068	440.128	4.15917	17.8663	0.662451	6.27846	3.41936e-10	4.81723e-09	CG11600	0	0	0	0	0	0	0	0
FBgn0033165	325.858	4.15698	17.8392	0.422415	9.84098	7.49806e-23	4.19689e-21	CG11113	0	0	0	0	0	0	0	0
FBgn0023415	10518.3	4.15689	17.8381	0.497992	8.34731	6.98379e-17	2.19041e-15	Acp32CD	0	0	0	0	0	0	0	0
FBgn0037036	1439.12	4.15333	17.7941	0.579308	7.16947	7.52876e-13	1.49272e-11	Sems	0	0	0	0	0	0	0	0
FBgn0032472	126.65	4.14627	17.7072	0.336837	12.3094	8.06012e-35	1.22186e-32	CG9928	0	0	0	0	0	0	0	0
FBgn0264085	603.625	4.14571	17.7004	0.38045	10.8969	1.19301e-27	9.38479e-26	lncRNA:CR43754	0	0	0	0	0	0	0	0
FBgn0265788	234.056	4.144	17.6795	0.423022	9.79618	1.16919e-22	6.39668e-21	lncRNA:CR44577	0	0	0	0	0	0	0	0
FBgn0031746	26693.9	4.13978	17.6278	0.507969	8.14968	3.64896e-16	1.06207e-14	CG9029	0	0	0	0	0	0	0	0
FBgn0050488	1795.02	4.13854	17.6126	0.524833	7.88544	3.13432e-15	8.29341e-14	antr	0	0	0	0	0	0	0	0
FBgn0261006	13.1989	4.13852	17.6125	1.00663	4.11125	3.93515e-05	0.000231574	snoRNA:83E4-5	0	0	0	0	0	0	0	0
FBgn0267327	11675.4	4.13806	17.6068	0.794322	5.20956	1.89293e-07	1.78072e-06	Acp33A	0	0	0	0	0	0	0	0
FBgn0052985	1548.21	4.13652	17.588	0.349468	11.8366	2.52386e-32	3.03552e-30	CG32985	0	0	0	0	0	0	0	0
FBgn0040608	3.53481	4.13261	17.5404	1.60823	2.56966	0.01018	0.0301422	CG14246	0	0	0	0	0	0	0	0
FBgn0050486	32.76	4.1288	17.4942	0.739185	5.58562	2.32873e-08	2.55966e-07	CG30486	0	0	0	0	0	0	0	0
FBgn0036158	2017.89	4.12407	17.4369	0.540585	7.62891	2.36752e-14	5.54824e-13	CG6149	0	0	0	0	0	0	0	0
FBgn0083938	15604.7	4.12251	17.4181	0.593704	6.94371	3.81924e-12	6.95638e-11	BG642163	0	0	0	0	0	0	0	0
FBgn0265268	2182.59	4.1201	17.389	0.526834	7.82049	5.26178e-15	1.3553e-13	CG18234	0	0	0	0	0	0	0	0
FBgn0262583	1638.56	4.11823	17.3665	0.71971	5.72207	1.05232e-08	1.22125e-07	CG43123	0	0	0	0	0	0	0	0
FBgn0030589	646.548	4.1126	17.2988	0.367729	11.1838	4.89478e-29	4.39715e-27	CG9519	0	0	0	0	0	0	0	0
FBgn0267199	26.1507	4.11203	17.292	0.729809	5.63439	1.75675e-08	1.98419e-07	lncRNA:CR45639	0	0	0	0	0	0	0	0
FBgn0265789	26.0342	4.11084	17.2777	0.747778	5.4974	3.85423e-08	4.0616e-07	lncRNA:CR44578	0	0	0	0	0	0	0	0
FBgn0264514	62.2978	4.10431	17.1996	0.556422	7.37624	1.62818e-13	3.46416e-12	lncRNA:CR43913	0	0	0	0	0	0	0	0
FBgn0264359	143.685	4.1028	17.1817	0.447142	9.1756	4.49077e-20	1.99251e-18	lncRNA:CR43811	0	0	0	0	0	0	0	0
FBgn0030665	77.7081	4.09913	17.1381	0.400467	10.2359	1.36931e-24	8.66418e-23	CG15646	0	0	0	0	0	0	0	0
FBgn0266182	19.4064	4.09836	17.1289	0.81204	5.04699	4.48829e-07	3.98281e-06	lncRNA:CR44888	0	0	0	0	0	0	0	0
FBgn0263500	185.234	4.08808	17.0073	0.457106	8.9434	3.77367e-19	1.53403e-17	lncRNA:CR43489	0	0	0	0	0	0	0	0
FBgn0259949	524.176	4.08611	16.9841	0.713424	5.72747	1.0194e-08	1.18683e-07	Sfp23F	0	0	0	0	0	0	0	0
FBgn0051659	2851.84	4.07912	16.9019	0.540842	7.54216	4.62254e-14	1.05277e-12	CG31659	0	0	0	0	0	0	0	0
FBgn0051419	1145.1	4.07825	16.8918	0.557719	7.31238	2.6246e-13	5.44877e-12	CG31419	0	0	0	0	0	0	0	0
FBgn0267666	3.41228	4.07686	16.8755	1.60825	2.53497	0.0112456	0.0327643	lncRNA:CR46004	0	0	0	0	0	0	0	0
FBgn0038719	92.6234	4.07602	16.8657	0.405154	10.0604	8.2634e-24	5.01072e-22	CG16727	0	0	0	0	0	0	0	0
FBgn0036601	93.2538	4.07376	16.8393	0.423279	9.62429	6.3144e-22	3.20186e-20	CG13063	0	0	0	0	0	0	0	0
FBgn0039787	1642.26	4.06927	16.787	0.337019	12.0743	1.44398e-33	1.92791e-31	CG9702	0	0	0	0	0	0	0	0
FBgn0266223	73.4914	4.06739	16.7651	0.438726	9.2709	1.84586e-20	8.44743e-19	lncRNA:CR44918	0	0	0	0	0	0	0	0
FBgn0262003	25.494	4.06379	16.7233	0.736235	5.51969	3.39591e-08	3.61262e-07	CG42821	0	0	0	0	0	0	0	0
FBgn0261508	232.561	4.06298	16.7139	0.378601	10.7316	7.23615e-27	5.45635e-25	CG42656	0	0	0	0	0	0	0	0
FBgn0263090	745.71	4.06123	16.6936	0.92819	4.37543	1.21195e-05	8.02068e-05	lncRNA:CR43358	0	0	0	0	0	0	0	0
FBgn0030103	226.502	4.06122	16.6936	0.423512	9.58939	8.86094e-22	4.46205e-20	Obp8a	0	0	0	0	0	0	0	0
FBgn0034588	53.6127	4.05833	16.6602	0.538534	7.5359	4.84977e-14	1.09936e-12	CG9394	0	0	0	0	0	0	0	0
FBgn0265087	541.682	4.05209	16.5882	0.676352	5.99109	2.08438e-09	2.65855e-08	CG44198	0	0	0	0	0	0	0	0
FBgn0265785	286.687	4.0502	16.5666	0.735218	5.50885	3.61194e-08	3.82154e-07	CG44574	0	0	0	0	0	0	0	0
FBgn0267268	9.48525	4.04462	16.5025	1.19266	3.39126	0.000695714	0.00296478	lncRNA:CR45704	0	0	0	0	0	0	0	0
FBgn0052413	249.001	4.03768	16.4234	0.394244	10.2416	1.29125e-24	8.2059e-23	CG32413	0	0	0	0	0	0	0	0
FBgn0035286	67.3187	4.02729	16.3055	0.547131	7.36074	1.82896e-13	3.86311e-12	CG13924	0	0	0	0	0	0	0	0
FBgn0264715	34.0116	4.02592	16.29	0.606571	6.63717	3.19759e-11	5.13625e-10	lncRNA:CR43983	0	0	0	0	0	0	0	0
FBgn0267564	12.3166	4.02339	16.2615	0.924286	4.35297	1.34305e-05	8.80819e-05	lncRNA:CR45904	0	0	0	0	0	0	0	0
FBgn0083966	1982.52	4.01989	16.2221	0.683981	5.8772	4.17276e-09	5.1594e-08	CG34130	0	0	0	0	0	0	0	0
FBgn0015586	20298.5	4.01847	16.2062	0.659007	6.09777	1.07561e-09	1.43346e-08	Acp76A	0	0	0	0	0	0	0	0
FBgn0032470	9.08913	4.01823	16.2034	1.08792	3.6935	0.00022119	0.00108566	Ttc30	0	0	0	0	0	0	0	0
FBgn0262143	551.52	4.01747	16.1949	0.729096	5.51021	3.58402e-08	3.80162e-07	CG42869	0	0	0	0	0	0	0	0
FBgn0265748	70.6646	4.01163	16.1295	0.527142	7.61015	2.73777e-14	6.38507e-13	lncRNA:CR44555	0	0	0	0	0	0	0	0
FBgn0052833	926.29	3.99987	15.9985	0.615093	6.50287	7.88035e-11	1.20339e-09	CG32833	0	0	0	0	0	0	0	0
FBgn0266789	45.5588	3.9985	15.9833	0.631291	6.33384	2.39127e-10	3.4696e-09	lncRNA:CR45254	0	0	0	0	0	0	0	0
FBgn0034221	228.673	3.9951	15.9458	0.26128	15.2905	8.84605e-53	3.13991e-50	CG10764	0	0	0	0	0	0	0	0
FBgn0263868	128.614	3.99394	15.9329	0.534481	7.47255	7.86545e-14	1.73171e-12	lncRNA:CR43715	0	0	0	0	0	0	0	0
FBgn0037280	6.12667	3.99271	15.9193	1.4533	2.74733	0.00600825	0.0192171	BBS5	0	0	0	0	0	0	0	0
FBgn0266826	63.6144	3.99113	15.9019	0.581236	6.86662	6.57406e-12	1.16107e-10	lncRNA:CR45288	0	0	0	0	0	0	0	0
FBgn0265673	259.976	3.98844	15.8723	0.690669	5.77475	7.70665e-09	9.14803e-08	lncRNA:CR44480	0	0	0	0	0	0	0	0
FBgn0030222	285.306	3.98753	15.8623	0.409386	9.74025	2.03054e-22	1.08243e-20	CG9806	0	0	0	0	0	0	0	0
FBgn0051371	44.9276	3.98548	15.8397	0.58294	6.83686	8.09466e-12	1.4193e-10	CG31371	0	0	0	0	0	0	0	0
FBgn0260766	4063.42	3.98108	15.7915	0.556869	7.14904	8.73875e-13	1.71164e-11	CG42564	0	0	0	0	0	0	0	0
FBgn0085374	162.703	3.97461	15.7209	0.447058	8.8906	6.0781e-19	2.37144e-17	CG34345	0	0	0	0	0	0	0	0
FBgn0036495	422.872	3.9712	15.6838	0.336342	11.807	3.58957e-32	4.1133e-30	CG33259	0	0	0	0	0	0	0	0
FBgn0266247	66.9224	3.96922	15.6623	1.13763	3.48903	0.000484781	0.00215486	lncRNA:CR44942	0	0	0	0	0	0	0	0
FBgn0036796	1922.87	3.96879	15.6576	0.343515	11.5535	7.08999e-31	7.26624e-29	CG18231	0	0	0	0	0	0	0	0
FBgn0032853	658.57	3.96856	15.6551	0.601612	6.59655	4.20828e-11	6.64241e-10	CG10651	0	0	0	0	0	0	0	0
FBgn0035429	174.087	3.96709	15.6392	0.283625	13.9871	1.86889e-44	4.77157e-42	CG12017	0	0	0	0	0	0	0	0
FBgn0034427	3.18763	3.96671	15.635	1.66982	2.37554	0.0175233	0.0472867	CG10474	0	0	0	0	0	0	0	1
FBgn0052834	8.68513	3.96069	15.5699	1.14606	3.45591	0.000548439	0.00240404	CG32834	0	0	0	0	0	0	0	0
FBgn0037038	2812.18	3.95397	15.4976	0.674323	5.86361	4.529e-09	5.56207e-08	CG11037	0	0	0	0	0	0	0	0
FBgn0263086	131.045	3.95378	15.4955	0.51388	7.69398	1.42627e-14	3.44082e-13	CG43354	0	0	0	0	0	0	0	0
FBgn0262948	372.356	3.94797	15.4333	0.742107	5.31995	1.03796e-07	1.02069e-06	CG43267	0	0	0	0	0	0	0	0
FBgn0259960	225.541	3.93693	15.3156	0.444118	8.86461	7.67745e-19	2.94026e-17	CG42470	0	0	0	0	0	0	0	0
FBgn0011555	1.87121	4.24902	19.0144	1.95452	2.17395	0.0297088	0.0726887	thetaTry	0	0	0	0	0	0	0	0
FBgn0267154	43.5283	3.93635	15.3095	0.60082	6.55164	5.69089e-11	8.80122e-10	lncRNA:CR45594	0	0	0	0	0	0	0	0
FBgn0050279	34.8798	3.93428	15.2875	0.596691	6.59349	4.29611e-11	6.75906e-10	CR30279	0	0	0	0	0	0	0	0
FBgn0040601	81.4758	3.93263	15.27	0.380278	10.3415	4.57506e-25	2.98569e-23	CG13643	0	0	0	0	0	0	0	0
FBgn0034870	153.065	3.93113	15.2541	0.507537	7.7455	9.52028e-15	2.36028e-13	CG13559	0	0	0	0	0	0	0	0
FBgn0030223	290.313	3.9306	15.2486	0.359578	10.9312	8.17986e-28	6.57688e-26	CG2111	0	0	0	0	0	0	0	0
FBgn0033277	54.9572	3.92939	15.2358	0.456384	8.60982	7.31725e-18	2.5294e-16	CG14760	0	0	0	0	0	0	0	0
FBgn0085371	14.5103	3.92909	15.2326	0.859652	4.57056	4.86422e-06	3.52009e-05	CG34342	0	0	0	0	0	0	0	0
FBgn0286872	48.9183	3.91745	15.1102	0.538162	7.27932	3.35517e-13	6.9158e-12	CG46394	0	0	0	0	0	0	0	0
FBgn0085314	388.833	3.91498	15.0844	0.342924	11.4165	3.45982e-30	3.44869e-28	CR34285	0	0	0	0	0	0	0	0
FBgn0264889	155.393	3.91419	15.0761	0.296626	13.1957	9.29048e-40	1.93149e-37	lncRNA:CR44080	0	0	0	0	0	0	0	0
FBgn0086674	343.908	3.912	15.0532	0.3462	11.2998	1.31465e-29	1.27547e-27	Tpst	0	0	0	0	0	0	0	0
FBgn0265787	37.5458	3.91179	15.051	0.666784	5.86665	4.44699e-09	5.46596e-08	lncRNA:CR44576	0	0	0	0	0	0	0	0
FBgn0264337	69.6861	3.90909	15.0228	0.621565	6.2891	3.19313e-10	4.54693e-09	lncRNA:CR43793	0	0	0	0	0	0	0	0
FBgn0039864	196.028	3.90766	15.008	0.428453	9.12038	7.48645e-20	3.16716e-18	CG11550	0	0	0	0	0	0	0	0
FBgn0250847	4071.41	3.9061	14.9918	0.761899	5.1268	2.94716e-07	2.68903e-06	CG14034	0	0	0	0	0	0	0	0
FBgn0250842	7820.38	3.90547	14.9852	0.536415	7.28068	3.32137e-13	6.85616e-12	CG17575	0	0	0	0	0	0	0	0
FBgn0266378	108.345	3.90465	14.9767	0.356122	10.9644	5.66887e-28	4.66097e-26	lncRNA:CR45020	0	0	0	0	0	0	0	0
FBgn0031961	11.3124	3.88999	14.8253	0.932928	4.16966	3.05061e-05	0.000183377	CG7102	0	0	0	0	0	0	0	0
FBgn0264552	420.541	3.88595	14.7838	0.609369	6.377	1.80587e-10	2.67626e-09	CG43931	0	0	0	0	0	0	0	0
FBgn0032192	482.152	3.88588	14.7832	0.364213	10.6693	1.41756e-26	1.04191e-24	CG5731	0	0	0	0	0	0	0	0
FBgn0003091	261.46	3.8839	14.7629	0.344393	11.2775	1.69428e-29	1.6329e-27	Pkc53E	0	0	0	0	0	0	0	0
FBgn0040093	6139.84	3.87377	14.6595	0.559949	6.91807	4.5784e-12	8.22586e-11	lectin-46Ca	0	0	0	0	0	0	0	0
FBgn0085324	85.762	3.86721	14.5931	0.459028	8.42478	3.61442e-17	1.1689e-15	CG34295	0	0	0	0	0	0	0	0
FBgn0264726	879.219	3.86688	14.5897	0.705102	5.48414	4.15482e-08	4.35941e-07	lncRNA:CR43994	0	0	0	0	0	0	0	0
FBgn0038014	737.869	3.86348	14.5554	0.662385	5.83268	5.45435e-09	6.62028e-08	CG10041	0	0	0	0	0	0	0	0
FBgn0040341	444.339	3.86348	14.5553	0.650636	5.938	2.8852e-09	3.6347e-08	CG11664	0	0	0	0	0	0	0	0
FBgn0008636	13.849	3.85637	14.4838	0.849646	4.53879	5.65771e-06	4.03611e-05	hbn	0	0	0	0	0	0	0	0
FBgn0034769	90.9104	3.85435	14.4636	0.369267	10.4379	1.66537e-25	1.11175e-23	Obp58c	0	0	0	0	0	0	0	0
FBgn0036285	1034.25	3.85361	14.4562	0.320087	12.0393	2.20891e-33	2.89606e-31	toe	0	0	0	0	0	0	0	0
FBgn0011758	1.74868	4.14814	17.7302	2.08755	1.98708	0.0469131	0.104761	B-H1	0	0	0	0	0	0	0	0
FBgn0266260	266.656	3.85347	14.4547	0.225675	17.0753	2.26561e-65	1.37381e-62	lncRNA:CR44955	0	0	0	0	0	0	0	0
FBgn0262880	87.9542	3.85323	14.4524	1.60091	2.4069	0.0160887	0.0440773	CG43235	0	0	0	0	0	0	0	0
FBgn0052383	400.676	3.84295	14.3497	0.396372	9.69531	3.15693e-22	1.66459e-20	sphinx1	0	0	0	0	0	0	0	0
FBgn0051496	838.728	3.83594	14.2801	0.569045	6.74101	1.57294e-11	2.63116e-10	CG31496	0	0	0	0	0	0	0	0
FBgn0263620	62.8789	3.8319	14.2402	0.527204	7.26835	3.63908e-13	7.4591e-12	asRNA:CR43629	0	0	0	0	0	0	0	0
FBgn0267211	19.0523	3.83104	14.2318	0.774992	4.94333	7.67992e-07	6.53219e-06	lncRNA:CR45651	0	0	0	0	0	0	0	0
FBgn0266073	29.7466	3.82633	14.1854	0.684909	5.58662	2.31527e-08	2.54679e-07	lncRNA:CR44826	0	0	0	0	0	0	0	0
FBgn0039780	50.8715	3.81552	14.0794	0.554381	6.88248	5.88193e-12	1.04645e-10	PH4alphaNE1	0	0	0	0	0	0	0	0
FBgn0029531	10.7822	3.81079	14.0334	1.0639	3.58191	0.000341096	0.00158391	CG13362	0	0	0	0	0	0	0	0
FBgn0263595	7.9217	3.80979	14.0237	1.2185	3.12663	0.0017682	0.0067012	lncRNA:CR43617	0	0	0	0	0	0	0	0
FBgn0266652	8.02617	3.80773	14.0037	1.08042	3.52432	0.000424574	0.00191354	lncRNA:CR45159	0	0	0	0	0	0	0	0
FBgn0263597	5049.96	3.80738	14.0002	0.78867	4.8276	1.38191e-06	1.1148e-05	Acp98AB	0	0	0	0	0	0	0	0
FBgn0267986	29.7514	3.80729	13.9994	0.643779	5.91396	3.33969e-09	4.1719e-08	lncRNA:CR46253	0	0	0	0	0	0	0	0
FBgn0038919	3020.59	3.80601	13.9869	0.639965	5.94721	2.72758e-09	3.4457e-08	Qsox2	0	0	0	0	0	0	0	0
FBgn0034866	157.855	3.80575	13.9844	0.348751	10.9125	1.00432e-27	7.98683e-26	Or59c	0	0	0	0	0	0	0	0
FBgn0011559	86037.5	3.8055	13.9821	0.612921	6.2088	5.33894e-10	7.37169e-09	Acp36DE	0	0	0	0	0	0	0	0
FBgn0034159	40.2007	3.8007	13.9356	0.632557	6.00847	1.87284e-09	2.4056e-08	CG15615	0	0	0	0	0	0	0	0
FBgn0266818	93.7642	3.7962	13.8922	0.479265	7.92088	2.35844e-15	6.37962e-14	lncRNA:CR45280	0	0	0	0	0	0	0	0
FBgn0040092	5347.67	3.78719	13.8057	0.540399	7.00815	2.41492e-12	4.49991e-11	lectin-46Cb	0	0	0	0	0	0	0	0
FBgn0031520	180.926	3.77272	13.6679	0.31704	11.8998	1.18608e-32	1.48802e-30	CG8837	0	0	0	0	0	0	0	0
FBgn0034229	13383.5	3.77201	13.6612	0.522891	7.21376	5.44273e-13	1.09403e-11	CG4847	0	0	0	0	0	0	0	1
FBgn0265982	165.375	3.76743	13.6179	0.477472	7.89036	3.01313e-15	8.00184e-14	lncRNA:CR44761	0	0	0	0	0	0	0	0
FBgn0265904	10.4568	3.76723	13.6159	1.01698	3.70433	0.00021195	0.00104416	lncRNA:CR44693	0	0	0	0	0	0	0	0
FBgn0036186	3090.92	3.76513	13.5962	0.335796	11.2125	3.53927e-29	3.23944e-27	CG6071	0	0	0	0	0	0	0	0
FBgn0033167	667.176	3.75607	13.5111	0.748672	5.01698	5.24895e-07	4.59339e-06	CG1701	0	0	0	0	0	0	0	0
FBgn0260440	15.2078	3.74295	13.3888	0.86044	4.35004	1.3611e-05	8.90566e-05	spdo	0	0	0	0	0	0	0	0
FBgn0037005	214.842	3.73425	13.3083	0.329667	11.3273	9.6087e-30	9.44834e-28	CG5078	0	0	0	0	0	0	0	0
FBgn0029821	90.1848	3.73358	13.3021	0.437143	8.54088	1.33205e-17	4.47782e-16	CG4020	0	0	0	0	0	0	0	0
FBgn0036752	868.715	3.73254	13.2924	0.191123	19.5295	6.16189e-85	5.60462e-82	Adgf-A	0	0	0	0	0	1	0	0
FBgn0034551	5.06899	3.7288	13.258	1.35224	2.75749	0.00582468	0.0187205	CG15225	0	0	0	0	0	0	0	0
FBgn0082983	5.05062	3.72611	13.2334	1.35753	2.74476	0.00605545	0.0193469	snoRNA:Psi28S-2626	0	0	0	0	0	0	0	0
FBgn0264377	150.523	3.72217	13.1973	0.473427	7.8622	3.77446e-15	9.87944e-14	CG43829	0	0	0	0	0	0	0	0
FBgn0053121	244.861	3.71624	13.1432	0.439583	8.45401	2.81466e-17	9.22561e-16	Spn28Db	0	0	0	0	0	0	0	0
FBgn0264329	2362.24	3.7153	13.1346	0.787186	4.71973	2.3616e-06	1.83005e-05	CG43788	0	0	0	0	0	0	0	0
FBgn0038756	22.772	3.71034	13.0895	0.735562	5.04422	4.55382e-07	4.02867e-06	CG4783	0	0	0	0	0	0	0	0
FBgn0050438	7183.27	3.70681	13.0575	0.570157	6.50139	7.95821e-11	1.2128e-09	Ugt50B3	0	0	0	0	0	0	0	0
FBgn0265266	521.014	3.70628	13.0527	0.676979	5.47474	4.3816e-08	4.59075e-07	CG13639	0	0	0	0	0	0	0	0
FBgn0263412	12.4379	3.6848	12.8599	0.892513	4.12857	3.65025e-05	0.000215331	lncRNA:CR43458	0	0	0	0	0	0	0	0
FBgn0267944	12.2993	3.68384	12.8513	0.858075	4.29315	1.76158e-05	0.000111851	lncRNA:CR46224	0	0	0	0	0	0	0	0
FBgn0263625	1098.01	3.67826	12.8017	0.673909	5.4581	4.81268e-08	4.98852e-07	lncRNA:CR43634	0	0	0	0	0	0	0	0
FBgn0036278	63.5666	3.67771	12.7968	0.414364	8.87555	6.95875e-19	2.69278e-17	CrzR	0	0	0	0	0	0	0	0
FBgn0035042	1750.82	3.67522	12.7747	0.325914	11.2767	1.7113e-29	1.63846e-27	CG3640	0	0	0	0	0	0	0	0
FBgn0266096	27.0419	3.67293	12.7544	0.671167	5.47245	4.43856e-08	4.63706e-07	lncRNA:CR44833	0	0	0	0	0	0	0	0
FBgn0047334	16933.1	3.67245	12.7502	0.937041	3.9192	8.88431e-05	0.000484608	BG642312	0	0	0	0	0	0	0	0
FBgn0038246	26.8376	3.66909	12.7205	0.596319	6.15289	7.60816e-10	1.02805e-08	CG14853	0	0	0	0	0	0	0	0
FBgn0039683	48.2113	3.65907	12.6325	0.465219	7.86527	3.68307e-15	9.65761e-14	dmrt99B	0	0	0	0	0	0	0	0
FBgn0265445	136.307	3.65709	12.6152	0.865211	4.22682	2.37016e-05	0.000146404	lncRNA:CR44345	0	0	0	0	0	0	0	0
FBgn0259957	223.607	3.65513	12.598	0.434677	8.40882	4.14145e-17	1.33342e-15	CG42467	0	0	0	0	0	0	0	0
FBgn0053511	21.8458	3.65221	12.5726	1.02912	3.54888	0.00038688	0.00176553	CG33511	0	0	0	0	0	0	0	0
FBgn0035216	728.195	3.64695	12.5268	0.589962	6.18166	6.3431e-10	8.68226e-09	CG9168	0	0	0	0	0	0	0	0
FBgn0036459	62.4031	3.6371	12.4416	0.533635	6.81571	9.37983e-12	1.6212e-10	CG3349	0	0	0	0	0	0	0	0
FBgn0264002	50.123	3.62768	12.3606	0.440477	8.23581	1.78352e-16	5.4074e-15	MsR2	0	0	0	0	0	0	0	0
FBgn0031617	8448.51	3.62741	12.3583	0.540808	6.70739	1.98143e-11	3.27679e-10	CG15635	0	0	0	0	0	0	0	0
FBgn0051872	50017.9	3.62304	12.3209	0.630496	5.74633	9.12001e-09	1.06891e-07	CG31872	0	0	0	0	0	0	0	0
FBgn0264336	154.482	3.6168	12.2677	0.427077	8.46872	2.48098e-17	8.15027e-16	lncRNA:CR43792	0	0	0	0	0	0	0	0
FBgn0264573	16.479	3.61213	12.2281	0.789307	4.57633	4.73208e-06	3.43814e-05	lncRNA:CR43945	0	0	0	0	0	0	0	0
FBgn0003145	1629.47	3.60129	12.1366	0.227788	15.8099	2.66098e-56	1.10752e-53	prd	0	0	0	0	0	0	0	0
FBgn0265672	105.406	3.5818	11.9737	0.537652	6.66193	2.7026e-11	4.37984e-10	lncRNA:CR44479	0	0	0	0	0	0	0	0
FBgn0051956	750.04	3.57816	11.9435	0.295475	12.1099	9.36522e-34	1.26196e-31	Pgant4	0	0	0	0	0	0	0	0
FBgn0026384	30.1193	3.57686	11.9328	0.639015	5.59746	2.17517e-08	2.41275e-07	Or59a	0	0	0	0	0	0	0	0
FBgn0051248	592.344	3.57394	11.9086	0.339871	10.5156	7.32499e-26	5.07622e-24	CG31248	0	0	0	0	0	0	0	0
FBgn0264716	32.3409	3.5629	11.8179	0.661272	5.38796	7.12634e-08	7.17714e-07	lncRNA:CR43984	0	0	0	0	0	0	0	0
FBgn0267307	25.0884	3.56166	11.8077	0.693023	5.13931	2.75749e-07	2.53185e-06	lncRNA:CR45743	0	0	0	0	0	0	0	0
FBgn0037650	455.099	3.55972	11.7918	0.615846	5.78021	7.46096e-09	8.87812e-08	CG11977	0	0	0	0	0	0	0	0
FBgn0000071	127.108	3.55856	11.7824	0.299803	11.8697	1.70097e-32	2.08019e-30	Ama	0	0	0	0	0	0	0	0
FBgn0026314	3203.07	3.55228	11.7312	0.522999	6.79212	1.10496e-11	1.88738e-10	Ugt35B1	0	0	0	0	0	0	0	0
FBgn0264857	263.206	3.54565	11.6774	0.349041	10.1583	3.04433e-24	1.88528e-22	lncRNA:iab8	0	0	0	0	0	0	0	0
FBgn0263866	82.3457	3.54508	11.6728	0.501077	7.07492	1.49536e-12	2.8447e-11	lncRNA:CR43713	0	0	0	0	0	0	0	0
FBgn0265932	4.5689	3.54082	11.6384	1.48076	2.39122	0.0167926	0.0456571	lncRNA:CR44721	0	0	0	0	0	0	0	0
FBgn0267452	13.5297	3.54047	11.6355	0.83616	4.2342	2.29369e-05	0.000141922	asRNA:CR45802	0	0	0	0	0	0	0	0
FBgn0036485	829.202	3.54	11.6318	0.569159	6.21971	4.98085e-10	6.91664e-09	FucTA	0	0	0	0	0	0	0	0
FBgn0263708	100.704	3.52247	11.4913	0.4434	7.94422	1.9542e-15	5.33572e-14	lncRNA:CR43660	0	0	0	0	0	0	0	0
FBgn0264863	11.2075	3.50832	11.3792	0.978927	3.58384	0.000338575	0.00157421	asRNA:CR44054	0	0	0	0	0	0	0	0
FBgn0035160	209.185	3.50697	11.3685	0.301685	11.6246	3.08949e-31	3.30598e-29	hng3	0	0	0	0	0	0	0	0
FBgn0039482	4.44961	3.50327	11.3393	1.4409	2.43131	0.0150444	0.041719	CG14258	0	0	0	0	0	0	0	0
FBgn0052199	1510.42	3.4945	11.2707	0.542916	6.43654	1.22226e-10	1.83376e-09	CG32199	0	0	0	0	0	0	0	0
FBgn0266951	43.9382	3.489	11.2278	0.563993	6.18625	6.16105e-10	8.45866e-09	lncRNA:CR45402	0	0	0	0	0	0	0	0
FBgn0038627	1857.39	3.48144	11.1691	0.177433	19.6212	1.01952e-85	9.89139e-83	CG7694	0	0	0	0	0	0	0	0
FBgn0263095	135.476	3.47841	11.1456	0.288248	12.0674	1.57021e-33	2.07738e-31	lncRNA:CR43363	0	0	0	0	0	0	0	0
FBgn0267316	6.55339	3.47133	11.0911	1.1883	2.92126	0.00348621	0.012074	lncRNA:CR45752	0	0	0	0	0	0	0	0
FBgn0265301	15.0619	3.46673	11.0558	0.827678	4.1885	2.80809e-05	0.00017106	lncRNA:CR44274	0	0	0	0	0	0	0	0
FBgn0037935	345.038	3.46643	11.0535	0.368902	9.39662	5.63442e-21	2.65365e-19	CG6834	0	0	0	0	0	0	0	0
FBgn0040528	1063.65	3.46496	11.0423	0.310753	11.1502	7.14361e-29	6.30067e-27	CG15864	0	0	0	0	0	0	0	0
FBgn0264701	19.4857	3.45954	11.0009	0.862138	4.01275	6.0015e-05	0.00033958	lncRNA:CR43970	0	0	0	0	0	0	0	0
FBgn0286933	36.6038	3.45775	10.9872	0.649963	5.31992	1.0381e-07	1.02069e-06	CG46430	0	0	0	0	0	0	0	0
FBgn0034151	42.6449	3.45594	10.9734	0.570334	6.05949	1.36553e-09	1.79843e-08	CG15617	0	0	0	0	0	0	0	0
FBgn0035929	5.77706	3.89487	14.8756	1.70531	2.28397	0.0223732	0.0578121	CG13311	0	0	0	0	0	0	0	0
FBgn0002570	30.8096	3.45493	10.9657	0.776045	4.45197	8.50851e-06	5.82428e-05	Mal-A1	0	0	0	0	0	0	0	0
FBgn0266839	17.0713	3.44899	10.9206	0.770731	4.47496	7.64273e-06	5.27381e-05	lncRNA:CR45301	0	0	0	0	0	0	0	0
FBgn0038069	720.911	3.43482	10.8139	0.715843	4.79829	1.60027e-06	1.27261e-05	CG11608	0	0	0	0	0	0	0	0
FBgn0261932	210.661	3.42781	10.7615	0.44331	7.73232	1.05606e-14	2.59609e-13	CG42798	0	0	0	0	0	0	0	0
FBgn0266207	20.9192	3.42218	10.7196	0.675103	5.06913	3.99648e-07	3.57692e-06	lncRNA:CR44902	0	0	0	0	0	0	0	0
FBgn0085313	35.3467	3.41806	10.689	0.717697	4.76254	1.91175e-06	1.50387e-05	CG34284	0	0	0	0	0	0	0	0
FBgn0085277	12.5127	3.40506	10.5932	0.871727	3.90611	9.37936e-05	0.000508145	CG34248	0	0	0	0	0	0	0	0
FBgn0031258	1015.88	3.37459	10.3718	0.314765	10.721	8.11236e-27	6.08552e-25	CG4297	0	0	0	0	0	0	0	0
FBgn0267267	8.08087	3.36016	10.2685	1.1506	2.92035	0.00349643	0.0120951	lncRNA:CR45703	0	0	0	0	0	0	0	0
FBgn0265670	54.2718	3.35082	10.2023	0.534369	6.27061	3.59641e-10	5.05199e-09	CG44477	0	0	0	0	0	0	0	0
FBgn0004427	433.869	3.34573	10.1663	0.38297	8.73625	2.4097e-18	8.68028e-17	LysD	0	0	0	0	0	0	0	0
FBgn0020880	11.9473	3.34465	10.1587	0.91281	3.66412	0.000248186	0.00120155	CG7179	0	0	0	0	0	0	0	0
FBgn0040256	402.61	3.3428	10.1457	0.384981	8.68302	3.85408e-18	1.36137e-16	Ugt35C1	0	0	0	0	0	0	0	0
FBgn0264899	7.94034	3.33526	10.0928	1.00805	3.30863	0.000937531	0.00386184	CG44090	0	0	0	0	0	0	0	0
FBgn0039485	31.1895	3.31689	9.96511	0.670556	4.94647	7.55705e-07	6.43521e-06	CG17189	0	0	0	0	0	0	0	0
FBgn0051413	1192.51	3.31182	9.93019	0.324465	10.207	1.84419e-24	1.15683e-22	Qsox4	0	0	0	0	0	0	0	0
FBgn0032614	263.05	3.30959	9.91484	0.351339	9.41993	4.5139e-21	2.1538e-19	CG13284	0	0	0	0	0	0	0	0
FBgn0039932	106.687	3.30312	9.87046	0.320957	10.2915	7.69957e-25	4.98008e-23	fuss	0	0	0	0	0	0	0	0
FBgn0265069	192.862	3.30142	9.85885	0.268129	12.3128	7.72942e-35	1.19666e-32	lncRNA:CR44180	0	0	0	0	0	0	0	0
FBgn0040795	27.3229	3.29767	9.83323	0.616578	5.34834	8.87664e-08	8.82389e-07	CG13038	0	0	0	0	0	0	0	0
FBgn0265910	7.83321	3.29509	9.81567	1.06223	3.10206	0.0019218	0.00722311	lncRNA:CR44699	0	0	0	0	0	0	0	0
FBgn0266651	127.598	3.29373	9.80642	0.421896	7.80695	5.8587e-15	1.50108e-13	lncRNA:CR45158	0	0	0	0	0	0	0	0
FBgn0267752	30.957	3.28755	9.76449	0.636018	5.16895	2.35416e-07	2.17939e-06	lncRNA:CR46083	0	0	0	0	0	0	0	0
FBgn0265737	5.67212	3.28171	9.72506	1.19066	2.75622	0.00584742	0.0187853	lncRNA:CR44544	0	0	0	0	0	0	0	0
FBgn0265897	117.379	3.27626	9.68843	0.299018	10.9567	6.16863e-28	5.04337e-26	lncRNA:CR44686	0	0	0	0	0	0	0	0
FBgn0039851	30.2804	3.27311	9.66728	0.642475	5.09454	3.49598e-07	3.15836e-06	mey	0	0	0	0	0	0	0	0
FBgn0041717	19.0838	3.27246	9.66295	0.668325	4.89651	9.75512e-07	8.12164e-06	snRNA:U6atac	0	0	0	0	0	0	0	0
FBgn0040318	284.369	3.25736	9.56231	0.22201	14.6722	9.71988e-49	2.82907e-46	HGTX	0	0	0	0	0	0	0	0
FBgn0263624	258.003	3.25306	9.53385	1.00355	3.24154	0.00118887	0.00474929	lncRNA:CR43633	0	0	0	0	0	0	0	0
FBgn0264429	146.248	3.24439	9.47674	0.292335	11.0982	1.28006e-28	1.0894e-26	lncRNA:CR43847	0	0	0	0	0	0	0	0
FBgn0265264	79957.7	3.23825	9.4365	0.673846	4.80562	1.54269e-06	1.23018e-05	CG17097	0	0	0	0	0	0	0	0
FBgn0266408	98.4572	3.23487	9.41444	0.338056	9.56904	1.07905e-21	5.39638e-20	lncRNA:CR45048	0	0	0	0	0	0	0	0
FBgn0031857	301.641	3.23407	9.40916	0.298009	10.8522	1.94634e-27	1.51471e-25	LUBEL	0	0	0	0	0	0	0	0
FBgn0039386	52.0876	3.23035	9.38494	0.42471	7.606	2.82705e-14	6.57222e-13	CG5948	0	0	0	0	0	0	0	0
FBgn0267190	93.3563	3.22543	9.35301	0.356719	9.04194	1.53911e-19	6.3996e-18	lncRNA:CR45630	0	0	0	0	0	0	0	0
FBgn0013751	55.524	3.21547	9.28865	0.616738	5.21367	1.8514e-07	1.74504e-06	Awh	0	0	0	0	0	0	0	0
FBgn0034474	33.3034	3.20658	9.2316	0.707504	4.53225	5.83593e-06	4.15307e-05	Obp56g	0	0	0	0	0	0	0	0
FBgn0265344	5.50132	3.1959	9.16351	1.1958	2.6726	0.00752665	0.0233153	lncRNA:CR44298	0	0	0	0	0	0	0	0
FBgn0040107	295.908	3.19496	9.15753	0.378424	8.44279	3.09841e-17	1.01329e-15	lectin-21Ca	0	0	0	0	0	0	0	0
FBgn0038419	288.982	3.17791	9.04997	0.362877	8.75756	1.9953e-18	7.27759e-17	CG14879	0	0	0	0	0	0	0	0
FBgn0266407	27.2772	3.17737	9.04658	0.678141	4.68541	2.79396e-06	2.13665e-05	lncRNA:CR45047	0	0	0	0	0	0	0	0
FBgn0034715	10.6507	3.17526	9.03337	1.29125	2.45906	0.0139301	0.0391512	Oatp58Db	0	0	0	0	0	0	0	0
FBgn0266569	339.033	3.17468	9.02974	0.357991	8.86806	7.44281e-19	2.85792e-17	CG42259	0	0	0	0	0	0	0	0
FBgn0266881	5.3664	3.17346	9.02206	1.22111	2.59882	0.00935445	0.0281213	asRNA:CR45342	0	0	0	0	0	0	0	0
FBgn0036532	19.6248	3.16365	8.96093	0.642676	4.92262	8.53951e-07	7.19603e-06	CG13445	0	0	0	0	0	0	0	0
FBgn0267918	6.933	3.15148	8.88566	1.10351	2.85587	0.00429197	0.0144321	lncRNA:CR46199	0	0	0	0	0	0	0	0
FBgn0000633	107.012	3.14789	8.86356	0.287409	10.9526	6.4532e-28	5.24656e-26	CG17716	0	0	0	0	0	0	0	0
FBgn0032318	3140.39	3.13978	8.81391	0.29714	10.5667	4.25258e-26	3.01892e-24	CG14072	0	0	0	0	0	0	0	0
FBgn0000039	8.76244	3.13694	8.79655	0.928677	3.37786	0.000730532	0.00309684	nAChRalpha2	0	0	0	0	0	0	0	0
FBgn0267987	241.705	3.1324	8.76892	0.380906	8.22355	1.97574e-16	5.96535e-15	lncRNA:CR46254	0	0	0	0	0	0	0	0
FBgn0051323	71.2248	3.12808	8.74271	0.367787	8.50513	1.81387e-17	6.05442e-16	CG31323	0	0	0	0	0	0	0	0
FBgn0051205	12.0736	3.12478	8.72275	0.79063	3.95227	7.74138e-05	0.000427716	CG31205	0	0	0	0	0	0	0	0
FBgn0052279	10.3713	3.12142	8.70243	0.84133	3.7101	0.000207177	0.00102309	Drsl2	0	0	0	0	0	0	0	0
FBgn0266259	20.9292	3.11945	8.69054	0.650002	4.79913	1.59352e-06	1.26863e-05	CG44954	0	0	0	0	0	0	0	0
FBgn0259229	15.437	3.11027	8.63546	0.778279	3.99635	6.43278e-05	0.000361754	CG42329	0	0	0	0	0	0	0	0
FBgn0262001	183.961	3.10724	8.6173	0.255166	12.1773	4.10642e-34	5.63781e-32	CG42819	0	0	0	0	0	0	0	0
FBgn0267114	8.39029	3.10683	8.61488	1.05053	2.95739	0.00310251	0.0109192	lncRNA:CR45554	0	0	0	0	0	0	0	0
FBgn0039621	17.2095	3.10146	8.58288	0.752456	4.12179	3.75947e-05	0.000221504	CG14518	0	0	0	0	0	0	0	0
FBgn0266246	6.83134	3.09336	8.53479	1.07287	2.88324	0.00393604	0.0133897	lncRNA:CR44941	0	0	0	0	0	0	0	0
FBgn0034867	358.741	3.09183	8.52579	0.416633	7.42101	1.16233e-13	2.51344e-12	CG13557	0	0	0	0	0	0	0	0
FBgn0265696	36.1592	3.09042	8.51746	0.635733	4.8612	1.16678e-06	9.54477e-06	lncRNA:CR44503	0	0	0	0	0	0	0	0
FBgn0266217	20.0887	3.07973	8.45457	0.681125	4.52154	6.13923e-06	4.33499e-05	lncRNA:CR44912	0	0	0	0	0	0	0	0
FBgn0039754	983.552	3.07382	8.42	0.248912	12.349	4.93111e-35	7.80027e-33	CG9747	0	0	0	0	0	0	0	0
FBgn0267656	6.5832	3.07057	8.40108	1.12317	2.73384	0.00625997	0.0199172	lncRNA:CR45994	0	0	0	0	0	0	0	0
FBgn0039328	462.845	3.06491	8.36817	0.357425	8.57498	9.91038e-18	3.36976e-16	CHKov2	0	0	0	0	0	0	0	0
FBgn0053096	4.97819	3.06006	8.34009	1.25297	2.44224	0.0145964	0.0406548	CG33096	0	0	0	0	0	0	0	0
FBgn0261560	815.718	3.05711	8.32303	0.230428	13.2671	3.59283e-40	7.80395e-38	Thor	0	0	0	0	0	1	0	0
FBgn0036179	46.7483	3.05567	8.31475	0.44765	6.82603	8.72962e-12	1.51602e-10	CG7368	0	0	0	0	0	0	0	0
FBgn0036986	11.6551	3.05429	8.3068	0.8119	3.76191	0.000168621	0.000854141	CG5282	0	0	0	0	0	0	0	0
FBgn0035928	2.49381	3.59419	12.077	1.72219	2.08698	0.0368895	0.0868133	CG13310	0	0	0	0	0	0	0	0
FBgn0263270	285.061	3.04943	8.27885	0.366686	8.31619	9.08383e-17	2.8127e-15	CG43396	0	0	0	0	0	0	0	0
FBgn0036220	8.35174	3.04096	8.23038	0.998739	3.0448	0.00232836	0.00849025	CG5897	0	0	0	0	0	0	0	0
FBgn0030452	34.5944	3.03891	8.21869	0.517032	5.87761	4.16238e-09	5.15095e-08	MFS10	0	0	0	0	0	0	0	0
FBgn0033869	8.14105	3.03821	8.21473	1.00186	3.03257	0.0024248	0.00880223	Cpr50Cb	0	0	0	0	0	0	0	0
FBgn0265922	131.244	3.03629	8.20377	0.478098	6.35077	2.14241e-10	3.13037e-09	lncRNA:CR44711	0	0	0	0	0	0	0	0
FBgn0039628	69.4264	3.03609	8.20263	0.423796	7.16403	7.83388e-13	1.5469e-11	CG11841	0	0	0	0	0	0	0	0
FBgn0038198	2105.1	3.03262	8.18297	0.322539	9.40234	5.33649e-21	2.5297e-19	Npc2b	0	0	0	0	0	0	0	0
FBgn0265086	14.9098	3.03089	8.17314	0.810554	3.73928	0.000184545	0.00092514	lncRNA:CR44197	0	0	0	0	0	0	0	0
FBgn0037003	390.376	3.02919	8.16353	0.901536	3.36004	0.000779323	0.00327789	CG18281	0	0	0	0	0	0	0	0
FBgn0031468	368.525	3.02769	8.15503	0.38548	7.85434	4.01891e-15	1.04628e-13	CG2975	0	0	0	0	0	0	0	0
FBgn0040350	49.153	3.01447	8.08063	0.721478	4.17818	2.93848e-05	0.0001777	CG3690	0	0	0	0	0	0	0	0
FBgn0038530	6.3535	3.01395	8.07773	1.16985	2.57636	0.00998454	0.029642	AttD	0	0	0	0	0	0	0	0
FBgn0052055	4.83947	3.01212	8.06747	1.1938	2.52314	0.0116311	0.0337048	CG32055	0	0	0	0	0	0	0	0
FBgn0266687	25.9189	3.01136	8.06323	0.618359	4.86992	1.11645e-06	9.16911e-06	lncRNA:CR45177	0	0	0	0	0	0	0	0
FBgn0039315	6.42424	3.00882	8.04904	1.11863	2.68973	0.00715102	0.0223419	CG13658	0	0	0	0	0	0	0	0
FBgn0014859	303.928	3.00693	8.03854	0.863728	3.48134	0.000498906	0.00221426	Hr38	0	0	0	0	0	0	0	0
FBgn0010470	3876.42	2.99784	7.98802	0.292639	10.2441	1.25739e-24	8.02579e-23	Fkbp14	0	0	0	0	0	0	0	0
FBgn0266037	9.68649	2.99754	7.98637	0.869906	3.44582	0.000569324	0.00248661	lncRNA:CR44802	0	0	0	0	0	0	0	0
FBgn0038717	9.66053	2.99722	7.98461	1.11546	2.68698	0.00721016	0.0224784	CG17751	0	0	0	0	0	0	0	0
FBgn0053099	70.4456	2.99668	7.98162	0.362505	8.26659	1.37846e-16	4.21444e-15	CG33099	0	0	0	0	0	0	0	0
FBgn0053288	308.159	2.99657	7.981	0.325436	9.20786	3.32679e-20	1.50356e-18	CG33288	0	0	0	0	0	0	0	0
FBgn0264897	1607.55	2.99628	7.97939	0.523501	5.72354	1.04328e-08	1.21172e-07	CG44088	0	0	0	0	0	0	0	0
FBgn0267792	986.449	2.96359	7.80064	0.145231	20.406	1.47892e-92	2.15227e-89	rgr	0	0	0	0	0	0	0	0
FBgn0036638	38.3777	2.94076	7.67816	0.463027	6.35116	2.13699e-10	3.12559e-09	CG13033	0	0	0	0	0	0	0	0
FBgn0034808	348.124	2.92606	7.60034	0.329734	8.874	7.05638e-19	2.71671e-17	CG9896	0	0	0	0	0	0	0	0
FBgn0032843	1713.05	2.92195	7.57868	0.275813	10.5939	3.17934e-26	2.27926e-24	CG10730	0	0	0	0	0	0	0	0
FBgn0031702	1186.17	2.91657	7.55048	0.311803	9.35388	8.44866e-21	3.95348e-19	fusl	0	0	0	0	0	0	0	0
FBgn0063667	16.7896	2.91437	7.53899	0.665667	4.37812	1.19707e-05	7.92583e-05	CG32335	0	0	0	0	0	0	0	0
FBgn0039408	232.781	2.91232	7.52827	0.227295	12.8129	1.38788e-37	2.52472e-35	CG14551	0	0	0	0	0	0	0	0
FBgn0267198	12.1723	2.91085	7.52062	0.8794	3.31005	0.000932809	0.0038481	lncRNA:CR45638	0	0	0	0	0	0	0	0
FBgn0037721	1290.53	2.90614	7.49608	0.330614	8.79013	1.49383e-18	5.48983e-17	CG9427	0	0	0	0	0	0	0	0
FBgn0034883	164.496	2.90415	7.48576	0.363848	7.98176	1.44263e-15	3.97625e-14	Eglp2	0	0	0	0	0	0	0	0
FBgn0032763	682.962	2.90261	7.47777	0.1581	18.3594	2.77906e-75	2.12861e-72	CG17568	0	0	0	0	0	0	0	0
FBgn0283508	18.0683	2.89498	7.43833	0.683582	4.23502	2.28536e-05	0.000141527	nw	0	0	0	0	0	0	0	0
FBgn0050339	95.3916	2.88669	7.39573	0.445328	6.48217	9.04124e-11	1.36917e-09	CG30339	0	0	0	0	0	0	0	0
FBgn0263323	136.74	2.87932	7.35805	0.426856	6.74543	1.52579e-11	2.5611e-10	lncRNA:CR43404	0	0	0	0	0	0	0	0
FBgn0014454	2.19258	3.39097	10.4902	1.90863	1.77665	0.0756258	0.153777	Acp1	0	0	0	0	0	0	0	0
FBgn0010041	1794.4	2.87693	7.34586	0.162311	17.7248	2.69946e-70	1.87073e-67	GstD5	0	0	0	0	0	0	0	0
FBgn0036382	14.6234	2.87609	7.3416	0.7762	3.70535	0.000211099	0.00104104	CG13737	0	0	0	0	0	0	0	0
FBgn0264960	13.4708	2.86604	7.29062	0.896025	3.19862	0.00138088	0.00539632	lncRNA:CR44129	0	0	0	0	0	0	0	0
FBgn0263657	54.8783	2.86359	7.27825	0.401518	7.13192	9.89809e-13	1.92576e-11	lncRNA:CR43648	0	0	0	0	0	0	0	0
FBgn0051494	7.35984	2.86025	7.2614	1.00688	2.8407	0.00450144	0.0149942	tRNA:Gly-TCC-1-1	0	0	0	0	0	0	0	0
FBgn0037290	36.5559	2.8591	7.25564	0.465108	6.14718	7.88718e-10	1.06083e-08	CG1124	0	0	0	0	0	0	0	0
FBgn0264911	261.323	2.85882	7.2542	0.376559	7.59195	3.15127e-14	7.31426e-13	CG44102	0	0	0	0	0	0	0	0
FBgn0267668	37.7633	2.85691	7.24464	0.485446	5.88514	3.97722e-09	4.926e-08	lncRNA:CR46006	0	0	0	0	0	0	0	0
FBgn0028938	8.7972	2.85344	7.22722	0.904394	3.15509	0.00160451	0.00614322	Vajk1	0	0	0	0	0	0	0	0
FBgn0002733	16.1205	2.8511	7.21548	0.696001	4.09639	4.19634e-05	0.000245554	E(spl)mbeta-HLH	0	0	0	0	0	0	0	0
FBgn0052201	321.812	2.84677	7.19387	0.354933	8.02059	1.05239e-15	2.96236e-14	CG32201	0	0	0	0	0	0	0	0
FBgn0031414	140.912	2.83972	7.15882	0.262589	10.8143	2.94447e-27	2.25531e-25	eys	0	0	0	0	0	0	0	0
FBgn0038505	52.7766	2.83895	7.155	0.417302	6.80312	1.0238e-11	1.75907e-10	CG17283	0	0	0	0	0	0	0	0
FBgn0035167	86.5161	2.83385	7.12973	0.308401	9.18884	3.97082e-20	1.77262e-18	Gr61a	0	0	0	0	0	0	0	0
FBgn0259712	74.8182	2.83359	7.12845	0.347597	8.15194	3.58137e-16	1.04448e-14	CG42366	0	0	0	0	0	0	0	0
FBgn0265906	12.9678	2.81908	7.05711	0.871533	3.23462	0.00121805	0.00483678	lncRNA:CR44695	0	0	0	0	0	0	0	0
FBgn0267179	43.4097	2.81554	7.03984	0.597107	4.71531	2.41344e-06	1.86823e-05	lncRNA:CR45619	0	0	0	0	0	0	0	0
FBgn0266884	104.915	2.81227	7.0239	0.409729	6.86375	6.70776e-12	1.18182e-10	lncRNA:CR45345	0	0	0	0	0	0	0	0
FBgn0265447	58.3397	2.79949	6.96195	0.400014	6.99848	2.58754e-12	4.797e-11	lncRNA:CR44347	0	0	0	0	0	0	0	0
FBgn0050489	220.829	2.79841	6.95675	0.733872	3.81322	0.00013717	0.00071218	Cyp12d1-p	0	0	0	0	0	0	0	0
FBgn0267255	39.2628	2.78895	6.91127	0.440238	6.3351	2.37192e-10	3.44497e-09	CG45691	0	0	0	0	0	0	0	0
FBgn0266819	136.588	2.78212	6.87863	0.316383	8.79352	1.44941e-18	5.34006e-17	asRNA:CR45281	0	0	0	0	0	0	0	0
FBgn0267459	51.7195	2.77674	6.85304	0.388506	7.14724	8.85426e-13	1.73194e-11	lncRNA:CR45809	0	0	0	0	0	0	0	0
FBgn0026755	1.99401	3.24379	9.47278	2.19923	1.47497	0.140222	0.251869	Ugt37B1	0	0	0	0	0	0	0	0
FBgn0263777	228.804	2.77054	6.82364	0.251273	11.026	2.86262e-28	2.38056e-26	CG43694	0	0	0	0	0	0	0	0
FBgn0265304	22.0756	2.75719	6.7608	0.566798	4.86451	1.14742e-06	9.39692e-06	lncRNA:CR44277	0	0	0	0	0	0	0	0
FBgn0266763	11.0624	2.75594	6.75494	0.80157	3.43818	0.000585638	0.00254868	lncRNA:CR45228	0	0	0	0	0	0	0	0
FBgn0025469	1570.35	2.75333	6.74274	0.309947	8.88325	6.49321e-19	2.52431e-17	slv	0	0	0	0	0	0	0	0
FBgn0038958	8.37325	2.75239	6.73833	0.990886	2.77771	0.00547437	0.0177673	CG13857	0	0	0	0	0	0	0	0
FBgn0083974	31.8766	2.74681	6.7123	0.495461	5.54395	2.95731e-08	3.18326e-07	CG34138	0	0	0	0	0	0	0	0
FBgn0037204	83.7981	2.73796	6.67128	0.510184	5.36662	8.02278e-08	8.01342e-07	CG11131	0	0	0	0	0	0	0	0
FBgn0264727	5.54156	2.73502	6.6577	1.13379	2.41228	0.0158533	0.0436213	lncRNA:CR43995	0	0	0	0	0	0	0	0
FBgn0264674	9.71163	2.73497	6.65745	0.888898	3.07681	0.00209228	0.00776166	asRNA:CR43959	0	0	0	0	0	0	0	0
FBgn0040376	1716.09	2.72634	6.61777	0.311847	8.74258	2.2784e-18	8.2277e-17	AANATL7	0	0	0	0	0	0	0	0
FBgn0003130	51.473	2.72515	6.61229	0.412704	6.60315	4.02504e-11	6.36701e-10	Poxn	0	0	0	0	0	0	0	0
FBgn0019952	585.124	2.72108	6.59368	0.241865	11.2504	2.30443e-29	2.19192e-27	Orct	0	0	1	1	1	0	0	0
FBgn0085236	6.80244	2.72034	6.5903	0.974421	2.79175	0.00524233	0.0171249	CG34207	0	0	0	0	0	0	0	0
FBgn0033593	11.974	2.72005	6.58896	0.80042	3.39828	0.000678107	0.00289738	Listericin	0	0	0	0	0	0	0	0
FBgn0039807	18.5412	2.71789	6.57908	0.701827	3.87259	0.000107687	0.000575741	CG15546	0	0	0	0	0	0	0	0
FBgn0037811	561.081	2.71335	6.55844	0.171625	15.8098	2.66359e-56	1.10752e-53	CG12592	0	0	0	0	0	0	0	0
FBgn0039914	885.07	2.6961	6.48047	0.282618	9.53972	1.43221e-21	7.08944e-20	mav	0	0	0	0	0	0	0	0
FBgn0032797	361.575	2.69576	6.47894	0.2566	10.5057	8.13324e-26	5.60962e-24	Hasp	0	0	0	0	0	0	0	0
FBgn0025833	6.71094	2.6945	6.47331	1.00422	2.68318	0.00729251	0.0227012	CG8910	0	0	0	0	0	0	0	0
FBgn0053169	399.071	2.69196	6.46191	0.317546	8.47739	2.303e-17	7.59989e-16	CG33169	0	0	0	0	0	0	0	0
FBgn0040106	145.39	2.68982	6.45233	0.46438	5.79229	6.94335e-09	8.30975e-08	lectin-21Cb	0	0	0	0	0	0	0	0
FBgn0038238	21.6145	2.68771	6.4429	0.732777	3.66784	0.000244606	0.00118817	CG14854	0	0	0	0	0	0	0	0
FBgn0032002	658.938	2.68716	6.44045	0.193289	13.9023	6.13539e-44	1.53945e-41	CG8353	0	0	0	0	0	0	0	0
FBgn0263843	20.0515	2.68588	6.43474	0.682493	3.9354	8.30585e-05	0.000456649	lncRNA:CR43704	0	0	0	0	0	0	0	0
FBgn0035548	46.9875	2.68472	6.42955	0.484939	5.5362	3.09109e-08	3.31257e-07	CG15023	0	0	0	0	0	0	0	0
FBgn0001147	112.464	2.68112	6.41354	0.266687	10.0534	8.87212e-24	5.35751e-22	gsb-n	0	0	0	0	0	0	0	0
FBgn0039838	49.7023	2.67703	6.3954	0.471583	5.67669	1.37324e-08	1.5662e-07	CAH6	0	0	0	0	0	0	0	0
FBgn0052205	326.403	2.67625	6.39191	0.235164	11.3803	5.23914e-30	5.18675e-28	hpRNA:CR32205	0	0	0	0	0	0	0	0
FBgn0263333	874.643	2.66692	6.35072	0.174045	15.3231	5.35693e-53	1.94898e-50	lncRNA:CR43414	0	0	0	0	0	0	0	0
FBgn0083945	445.037	2.66473	6.34109	0.18511	14.3954	5.53105e-47	1.49062e-44	CG34109	0	0	0	0	0	0	0	0
FBgn0034010	463.197	2.65917	6.3167	0.617155	4.30876	1.64176e-05	0.000105346	CG8157	0	0	0	0	0	0	0	0
FBgn0050361	20.9512	2.65906	6.31621	0.572196	4.64711	3.36616e-06	2.53298e-05	mtt	0	0	0	0	0	0	0	0
FBgn0039344	13.0179	2.65158	6.28353	0.719093	3.68739	0.000226568	0.00110906	CG4582	0	0	0	0	0	0	0	0
FBgn0031955	49.2586	2.6505	6.27885	0.382957	6.92114	4.48022e-12	8.06938e-11	CG14535	0	0	0	0	0	0	0	0
FBgn0038946	26.9272	2.64917	6.27307	0.543668	4.87277	1.10042e-06	9.04772e-06	rdhB	0	0	0	0	0	0	0	0
FBgn0264350	17.0277	2.64714	6.26426	0.762674	3.47087	0.00051877	0.00229194	asRNA:CR43806	0	0	0	0	0	0	0	0
FBgn0267703	11.67	2.64532	6.25633	0.805485	3.28413	0.00102298	0.00416643	lncRNA:CR46036	0	0	0	0	0	0	0	0
FBgn0003638	5449.49	2.6447	6.25365	0.29499	8.96538	3.09204e-19	1.26756e-17	su(w[a])	0	0	0	0	0	0	0	0
FBgn0036349	8.91682	2.64008	6.23368	0.863585	3.05712	0.00223473	0.0082002	SNCF	0	0	0	0	0	0	0	0
FBgn0030271	34.6535	2.63368	6.20606	0.530755	4.96213	6.97248e-07	5.96885e-06	CG15202	0	0	0	0	0	0	0	0
FBgn0037213	211.367	2.6331	6.20356	0.32082	8.20739	2.26054e-16	6.72755e-15	CG12581	0	0	0	0	0	0	0	0
FBgn0039596	141.073	2.62636	6.17466	0.270993	9.6916	3.2737e-22	1.71375e-20	CG10000	0	0	0	0	0	0	0	0
FBgn0038897	47.7583	2.62592	6.17277	0.459647	5.7129	1.11066e-08	1.28587e-07	CG5849	0	0	0	0	0	0	0	0
FBgn0004003	1545.75	2.62393	6.16425	0.29357	8.93799	3.96325e-19	1.5977e-17	wbl	0	0	0	0	0	0	0	0
FBgn0037181	7.56564	2.61627	6.13161	0.915694	2.85714	0.00427476	0.0143873	CG11370	0	0	0	0	0	0	0	0
FBgn0038789	15.1496	2.61577	6.1295	0.688112	3.80137	0.000143896	0.000741805	Ir92a	0	0	0	0	0	0	0	0
FBgn0040045	16.5725	2.61442	6.12378	0.641994	4.07234	4.65424e-05	0.000270176	CR12460	0	0	0	0	0	0	0	0
FBgn0035157	6.36535	2.60473	6.08276	1.10757	2.35174	0.0186857	0.0499143	CG13894	0	0	0	0	0	0	0	0
FBgn0031974	168.817	2.60124	6.06809	0.271377	9.58534	9.21549e-22	4.62459e-20	CG12560	0	0	0	0	0	0	0	0
FBgn0033594	7.41266	2.59778	6.05356	1.06584	2.43731	0.0147972	0.0411071	CG13226	0	0	0	0	0	0	0	0
FBgn0261813	22.8741	2.59064	6.02365	0.643076	4.02851	5.61317e-05	0.00031972	lncRNA:CR42755	0	0	0	0	0	0	0	0
FBgn0035933	38.8841	3.01254	8.06982	1.87676	1.60518	NA	NA	CG13309	0	0	0	0	0	0	0	0
FBgn0264272	184.702	2.5901	6.02139	0.369635	7.00717	2.43188e-12	4.52572e-11	mwh	0	0	0	0	0	0	0	0
FBgn0052636	17.2882	2.58914	6.01739	0.692362	3.73957	0.000184333	0.000924395	lncRNA:CR32636	0	0	0	0	0	0	0	0
FBgn0038450	105.838	2.58851	6.01478	0.311593	8.30735	9.78617e-17	3.02374e-15	CG17560	0	0	0	0	0	0	0	0
FBgn0004370	1764.57	2.58359	5.9943	0.229672	11.249	2.34148e-29	2.2127e-27	Ptp10D	0	0	0	0	0	0	0	0
FBgn0032422	484.842	2.58265	5.99038	0.295742	8.73276	2.48534e-18	8.91543e-17	atilla	0	0	0	0	0	0	0	0
FBgn0038113	7.59625	2.57218	5.94708	1.06926	2.40556	0.0161475	0.0442135	CG11668	0	0	0	0	0	0	0	0
FBgn0262943	91.3142	2.56295	5.90916	0.444434	5.76678	8.0802e-09	9.56026e-08	lncRNA:CR43262	0	0	0	0	0	0	0	0
FBgn0030932	3104.91	2.55838	5.89047	0.300007	8.52775	1.49226e-17	4.99239e-16	Ggt-1	0	0	0	0	0	0	0	0
FBgn0265937	110.612	2.55725	5.88585	0.380033	6.72903	1.70803e-11	2.8408e-10	asRNA:CR44724	0	0	0	0	0	0	0	0
FBgn0263234	39.9594	2.55651	5.88283	0.47392	5.39439	6.87549e-08	6.94854e-07	Phae1	0	0	0	0	0	0	0	0
FBgn0265666	8.68754	2.55312	5.86902	0.97729	2.61245	0.00898964	0.0272215	lncRNA:CR44473	0	0	0	0	0	0	0	0
FBgn0261700	13.6943	2.54401	5.83208	0.856153	2.97144	0.00296404	0.0104994	lncRNA:CR42736	0	0	0	0	0	0	0	0
FBgn0085480	7.08223	2.53702	5.80391	1.03739	2.44558	0.0144621	0.0403581	CG34451	0	0	0	0	0	0	0	0
FBgn0032752	306.786	2.53319	5.78852	0.306993	8.25163	1.56245e-16	4.76694e-15	CG10702	0	0	0	0	0	0	0	0
FBgn0261799	26.3193	2.53023	5.77664	0.515922	4.90429	9.37675e-07	7.85155e-06	dsx-c73A	0	0	0	0	0	0	0	0
FBgn0039244	111.854	2.52911	5.77216	0.276775	9.13778	6.37492e-20	2.7367e-18	CG11069	0	0	0	0	0	0	0	0
FBgn0040764	295.61	2.52194	5.74353	0.275869	9.14179	6.14253e-20	2.66048e-18	CG13230	0	0	0	0	0	0	0	0
FBgn0034565	8.48179	2.51969	5.7346	0.91846	2.74339	0.00608091	0.0194112	CG15650	0	0	0	0	0	0	0	0
FBgn0264271	22.7788	2.51778	5.72701	0.567558	4.43617	9.15745e-06	6.22749e-05	lncRNA:CR43771	0	0	0	0	0	0	0	0
FBgn0030511	127.649	2.51765	5.72648	0.285794	8.80931	1.25922e-18	4.69884e-17	CG11158	0	0	0	0	0	0	0	0
FBgn0032602	4.53469	2.90367	7.48329	1.27407	2.27906	0.0226634	0.0583959	ppk17	0	0	0	0	0	0	0	0
FBgn0038070	34.6909	2.51377	5.7111	0.454961	5.52523	3.29045e-08	3.50813e-07	CG6753	0	0	0	0	0	0	0	0
FBgn0032161	71.7193	2.50904	5.69242	0.323898	7.74641	9.45291e-15	2.34758e-13	CG4594	1	0	0	0	0	0	0	0
FBgn0000492	120.965	2.50663	5.6829	0.326593	7.67509	1.65299e-14	3.95008e-13	Dr	0	0	0	0	0	0	0	0
FBgn0038115	91.2522	2.50635	5.68182	0.298159	8.40611	4.23836e-17	1.35861e-15	CG7966	0	0	0	0	0	0	0	0
FBgn0028988	925.762	2.50299	5.66859	0.325361	7.69296	1.43772e-14	3.45837e-13	Spn42Dd	0	0	0	0	0	0	0	0
FBgn0032008	282.254	2.4958	5.6404	0.362781	6.87963	6.00062e-12	1.06496e-10	CG14277	0	0	0	0	0	0	0	0
FBgn0030056	686.774	2.49107	5.62194	0.269733	9.23532	2.57504e-20	1.16743e-18	CAH3	0	0	0	0	0	0	0	0
FBgn0031694	66.4733	2.4907	5.6205	0.389738	6.3907	1.65124e-10	2.45209e-09	Cyp4ac2	0	0	0	0	0	0	0	0
FBgn0031611	746.412	2.48328	5.59168	0.249844	9.93934	2.80692e-23	1.621e-21	FIG4	0	0	0	0	0	0	0	0
FBgn0003060	23.4554	2.47464	5.55827	0.550816	4.49268	7.0334e-06	4.89747e-05	CG9757	0	0	0	0	0	0	0	0
FBgn0035699	29.1721	2.47368	5.55457	0.57059	4.33529	1.45566e-05	9.44883e-05	CG13300	0	0	0	0	0	0	0	0
FBgn0050418	182.102	2.47117	5.54493	0.28494	8.6726	4.22367e-18	1.48114e-16	nord	0	0	0	0	0	0	0	0
FBgn0042129	12.5603	2.46249	5.51169	0.736885	3.34176	0.000832485	0.00347238	OS9	0	0	0	0	0	0	0	0
FBgn0028699	62.6452	2.45736	5.49212	0.439448	5.59194	2.24549e-08	2.47565e-07	Rh50	0	0	0	0	0	0	0	0
FBgn0028533	16.0235	2.45133	5.4692	0.634216	3.86513	0.000111029	0.000591003	CG7953	0	0	0	0	0	0	0	0
FBgn0034789	63.2179	2.44805	5.45677	0.333855	7.33268	2.25598e-13	4.72393e-12	PIP5K59B	0	0	0	0	0	0	0	0
FBgn0267702	43.2178	2.43069	5.39151	0.439304	5.53305	3.14714e-08	3.36768e-07	lncRNA:CR46035	0	0	0	0	0	0	0	0
FBgn0036106	4364.63	2.4268	5.37701	0.132696	18.2885	1.02257e-74	7.44071e-72	CG6409	0	0	0	0	0	0	0	0
FBgn0000351	101.089	2.42516	5.37089	0.311422	7.78739	6.84069e-15	1.72834e-13	cort	0	0	0	0	0	0	0	0
FBgn0004186	24.9191	2.42463	5.36892	0.542454	4.46975	7.83114e-06	5.3987e-05	snRNA:U1:95Cb	0	0	0	0	0	0	0	0
FBgn0032693	1592.63	2.42099	5.3554	0.196494	12.3209	6.98731e-35	1.0934e-32	Cyp310a1	0	0	0	0	0	0	0	0
FBgn0052816	225.192	2.41982	5.35106	0.321995	7.51509	5.68732e-14	1.27531e-12	CG32816	0	0	0	0	0	0	0	0
FBgn0032840	11.1381	2.41927	5.34902	0.806785	2.99866	0.00271169	0.00972001	sNPF	0	0	0	0	0	0	0	0
FBgn0053533	16.8537	2.41168	5.32093	0.614696	3.92337	8.73184e-05	0.0004772	lectin-37Db	0	0	0	0	0	0	0	0
FBgn0265199	120.21	2.41086	5.3179	0.269669	8.94004	3.89027e-19	1.57264e-17	CG44259	0	0	0	0	0	0	0	0
FBgn0039494	292.167	2.41074	5.31745	0.192517	12.5222	5.64368e-36	9.77768e-34	grass	0	0	0	0	0	0	0	0
FBgn0035948	49.3255	2.40891	5.31073	0.369309	6.52274	6.90345e-11	1.06089e-09	CG5644	0	0	0	0	0	0	0	0
FBgn0038295	30.2801	2.40312	5.28944	0.468668	5.12754	2.93553e-07	2.6801e-06	Gyc88E	0	0	0	0	0	0	0	0
FBgn0053547	899.94	2.40207	5.28562	0.165893	14.4797	1.62834e-47	4.47119e-45	Rim	0	0	0	0	0	0	0	0
FBgn0003089	151.986	2.39143	5.24677	0.251209	9.51969	1.73702e-21	8.54014e-20	pip	0	0	0	0	0	0	0	0
FBgn0053497	81.6672	2.38901	5.23798	0.35305	6.76679	1.31675e-11	2.22822e-10	Sdic2	0	0	0	0	0	0	0	0
FBgn0004168	72.5503	2.38466	5.22222	0.399599	5.96765	2.40696e-09	3.05392e-08	5-HT1A	0	0	0	0	0	0	0	0
FBgn0031542	11.027	2.38029	5.20641	0.808651	2.94353	0.00324494	0.0113451	CG15414	0	0	0	0	0	0	0	0
FBgn0266100	41.1422	2.37849	5.19994	0.43543	5.46241	4.69718e-08	4.87575e-07	CG44837	0	0	0	0	0	0	0	0
FBgn0005638	4.02135	2.73629	6.66356	1.31778	2.07644	0.0378533	0.0886655	slbo	0	0	0	0	0	0	0	0
FBgn0266536	61.1759	2.37677	5.19372	0.491193	4.83876	1.3065e-06	1.05771e-05	lncRNA:CR45097	0	0	0	0	0	0	0	0
FBgn0266812	30.0844	2.37416	5.18433	0.598351	3.96783	7.25297e-05	0.000402872	lncRNA:CR45274	0	0	0	0	0	0	0	0
FBgn0035189	155.033	2.37185	5.17606	0.782707	3.03032	0.00244294	0.00886366	CG9119	0	0	0	0	0	0	0	0
FBgn0042101	21.2599	2.36896	5.1657	0.665154	3.56153	0.0003687	0.00169425	CG18744	0	0	0	0	0	0	0	0
FBgn0022770	57.4203	2.36685	5.15812	0.532922	4.44126	8.94348e-06	6.09052e-05	Peritrophin-A	0	0	0	0	0	0	0	0
FBgn0036824	385.937	2.35699	5.12299	0.63444	3.71507	0.000203149	0.00100697	CG3902	1	0	0	0	0	0	0	0
FBgn0028481	66.756	2.35394	5.11218	0.347672	6.77057	1.28275e-11	2.17321e-10	CG4341	0	0	0	0	0	0	0	0
FBgn0259112	133.801	2.35095	5.10161	0.264389	8.89202	6.00073e-19	2.34754e-17	asRNA:CR42254	0	0	0	0	0	0	0	0
FBgn0061209	17.3746	2.35035	5.09946	0.663502	3.54233	0.000396605	0.00180312	His2B:CG17949	0	0	0	0	0	0	0	0
FBgn0267661	6.51542	2.34895	5.09452	0.978722	2.40001	0.0163945	0.0447634	asRNA:CR45999	0	0	0	0	0	0	0	0
FBgn0011701	6.4531	2.34726	5.08857	0.970781	2.41791	0.0156101	0.0430334	repo	0	0	0	0	0	0	0	0
FBgn0030984	87.5071	2.34302	5.07364	0.375283	6.24335	4.28307e-10	5.97618e-09	tgy	0	0	0	0	0	0	0	0
FBgn0024841	649.984	2.3423	5.07109	0.15601	15.0138	5.96358e-51	1.8867e-48	Pcd	0	0	0	0	0	0	0	0
FBgn0030495	176.879	2.33449	5.04374	0.263033	8.87528	6.97572e-19	2.69278e-17	CG11816	0	0	0	0	0	0	0	0
FBgn0028563	117.781	2.33223	5.03585	0.310232	7.51772	5.57391e-14	1.25374e-12	sut1	0	0	0	0	0	0	0	0
FBgn0039480	12.9163	2.32799	5.02107	0.758157	3.0706	0.00213631	0.00789482	Cpr97Ea	0	0	0	0	0	0	0	0
FBgn0287215	13.6469	2.32798	5.02101	0.752098	3.09531	0.00196606	0.0073553	lncRNA:CR46445	0	0	0	0	0	0	0	0
FBgn0031693	788.095	2.32687	5.01716	0.263845	8.81908	1.15406e-18	4.3286e-17	Cyp4ac1	0	0	0	0	0	0	0	0
FBgn0263240	433.898	2.3219	4.99989	0.28359	8.1875	2.66704e-16	7.85697e-15	Coop	0	0	0	0	0	0	0	0
FBgn0026616	821.132	2.32161	4.99888	0.325466	7.13316	9.80885e-13	1.91095e-11	alpha-Man-IIb	0	0	0	0	0	0	0	0
FBgn0041234	64.1091	2.31958	4.99188	0.327741	7.07748	1.468e-12	2.80026e-11	Gr59f	0	0	0	0	0	0	0	0
FBgn0033501	22.7474	2.31875	4.98898	0.657627	3.52593	0.000422002	0.00190395	CG12911	0	0	0	0	0	0	0	0
FBgn0016684	79.1984	2.66414	6.3385	1.2454	2.13919	NA	NA	NaPi-T	0	0	0	0	0	0	0	0
FBgn0266257	40.7662	2.31393	4.97234	0.542696	4.26376	2.01017e-05	0.000125878	lncRNA:CR44952	0	0	0	0	0	0	0	0
FBgn0034318	8.525	2.30967	4.95769	0.838316	2.75513	0.00586691	0.0188396	CG14500	0	0	0	0	0	0	0	0
FBgn0004784	2.63563	2.65186	6.28476	1.67609	1.58217	0.113611	0.213064	inaC	0	0	0	0	0	0	0	0
FBgn0287621	9.4453	2.30066	4.92682	0.794236	2.89669	0.00377117	0.0129043	lncRNA:CR46490	0	0	0	0	0	0	0	0
FBgn0052683	11.6165	2.28916	4.88771	0.748173	3.05967	0.00221583	0.00814524	CG32683	0	0	0	0	0	0	0	0
FBgn0261953	24.1994	2.28602	4.87708	0.527589	4.33295	1.47122e-05	9.54132e-05	TfAP-2	0	0	0	0	0	0	0	0
FBgn0050395	11862.8	2.28369	4.86922	0.32469	7.03344	2.015e-12	3.79357e-11	CG30395	0	0	0	0	0	0	0	0
FBgn0032387	150.644	2.28084	4.8596	0.340863	6.69136	2.21109e-11	3.63594e-10	CG16965	0	0	0	0	0	0	0	0
FBgn0030334	27.5415	2.27857	4.85198	0.604776	3.76763	0.000164802	0.000837708	Karl	0	0	0	0	0	0	0	0
FBgn0050076	38.5652	2.27786	4.84958	0.403639	5.64332	1.66806e-08	1.88619e-07	CG30076	0	0	0	0	0	0	0	0
FBgn0053052	192.406	2.27717	4.84725	0.30675	7.42354	1.14033e-13	2.46952e-12	Gorab	0	0	0	0	0	0	0	0
FBgn0266969	8.45847	2.27674	4.84581	0.927207	2.45548	0.0140697	0.039452	lncRNA:CR45420	0	0	0	0	0	0	0	0
FBgn0264087	134.717	2.27511	4.84033	0.269995	8.42647	3.56245e-17	1.15724e-15	Slob	0	0	0	0	0	0	0	0
FBgn0037577	171.342	2.27413	4.83705	0.297467	7.64498	2.08972e-14	4.91276e-13	CG7443	0	0	0	0	0	0	0	0
FBgn0035777	41.4058	2.27101	4.8266	0.412253	5.50878	3.6133e-08	3.82154e-07	CG8563	0	0	0	0	0	0	0	0
FBgn0266158	95.9639	2.2706	4.82524	0.294053	7.72174	1.14751e-14	2.81141e-13	lncRNA:CR44864	0	0	0	0	0	0	0	0
FBgn0264840	276.508	2.26268	4.79882	0.211827	10.6817	1.23933e-26	9.15533e-25	lncRNA:CR44048	0	0	0	0	0	0	0	0
FBgn0036927	166.674	2.26229	4.79753	0.318439	7.10431	1.20921e-12	2.33139e-11	Gabat	1	0	0	0	0	0	0	0
FBgn0035574	140.012	2.2542	4.77069	0.291963	7.72082	1.15581e-14	2.82698e-13	RhoGEF64C	0	0	0	0	0	0	0	0
FBgn0264618	7.24416	2.245	4.74037	0.936841	2.39635	0.0165592	0.0451453	lncRNA:CR43958	0	0	0	0	0	0	0	0
FBgn0267619	46.2944	2.24472	4.73944	0.392116	5.72462	1.03663e-08	1.20592e-07	lncRNA:CR45957	0	0	0	0	0	0	0	0
FBgn0033723	19.5028	2.24455	4.73888	0.589228	3.8093	0.00013936	0.000722003	CG13155	0	0	0	0	0	0	0	0
FBgn0030332	259.682	2.23909	4.72099	0.90397	2.47695	0.013251	0.0375165	CG9360	0	0	0	0	0	0	0	0
FBgn0267644	718.344	2.23405	4.70454	0.161434	13.8388	1.48738e-43	3.5485e-41	lncRNA:CR45982	0	0	0	0	0	0	0	0
FBgn0267951	25.1876	2.23143	4.69601	0.516	4.32449	1.52888e-05	9.89636e-05	lncRNA:CR46231	0	0	0	0	0	0	0	0
FBgn0032668	43.629	2.2306	4.69331	0.404959	5.50822	3.62476e-08	3.83087e-07	CG17681	0	0	0	0	0	0	0	0
FBgn0085428	20.062	2.22392	4.6716	0.590856	3.76389	0.00016729	0.000849168	Nox	0	0	0	0	0	0	0	0
FBgn0039238	32.9778	2.21687	4.64883	0.494585	4.48228	7.38502e-06	5.10809e-05	CG7016	0	0	0	0	0	0	0	0
FBgn0261611	15.9017	2.20862	4.62232	0.679952	3.24819	0.0011614	0.00465232	CG42700	0	0	0	0	0	0	0	0
FBgn0039768	2.48411	2.55854	5.89113	1.60568	1.59344	0.111062	0.209147	CG15533	0	0	0	0	0	0	0	1
FBgn0001323	24.846	2.20538	4.61196	0.581307	3.79383	0.00014834	0.000762826	knrl	0	0	0	0	0	0	0	0
FBgn0264887	14.9381	2.20353	4.60606	0.62991	3.49817	0.000468466	0.00209128	lncRNA:CR44078	0	0	0	0	0	0	0	0
FBgn0263870	29.0244	2.20003	4.5949	0.518852	4.2402	2.23321e-05	0.000138652	lncRNA:CR43717	0	0	0	0	0	0	0	0
FBgn0266033	11.0385	2.19906	4.5918	0.875841	2.5108	0.0120459	0.0346929	lncRNA:CR44798	0	0	0	0	0	0	0	0
FBgn0261262	141.351	2.19645	4.58349	0.316529	6.93916	3.94441e-12	7.16642e-11	CG42613	0	0	0	0	0	0	0	0
FBgn0027546	9.90651	2.19301	4.57258	0.771351	2.84307	0.00446809	0.0148974	CG4766	0	0	0	0	0	0	0	0
FBgn0039380	8.02341	2.19286	4.5721	0.90899	2.41241	0.0158474	0.0436132	CG5890	0	0	0	0	0	0	0	0
FBgn0041097	75.8607	2.19098	4.56616	0.316183	6.92947	4.22421e-12	7.65565e-11	robo3	0	0	0	0	0	0	0	0
FBgn0015011	69.1859	2.18734	4.55466	0.44592	4.90523	9.33163e-07	7.81826e-06	AhcyL2	0	0	0	0	0	0	0	0
FBgn0031031	22.1853	2.18704	4.55371	0.805502	2.71513	0.00662501	0.0209413	CG14218	0	0	0	0	0	0	0	0
FBgn0051116	565.726	2.18264	4.53984	0.222419	9.81318	9.88062e-23	5.4674e-21	ClC-a	0	0	0	0	0	0	0	0
FBgn0026398	26.378	2.17899	4.52835	0.49102	4.43767	9.0937e-06	6.18703e-05	Or22a	0	0	0	0	0	0	0	0
FBgn0039094	1541.32	2.17872	4.5275	0.259525	8.39503	4.65792e-17	1.48376e-15	CG10184	0	0	0	0	0	0	0	0
FBgn0024994	590.543	2.17558	4.51768	0.312346	6.96529	3.27734e-12	6.01452e-11	Ugalt	0	0	0	0	0	0	0	0
FBgn0027584	25.8687	2.51332	5.70933	2.0869	1.20433	0.228462	0.365042	CG4757	0	0	0	0	0	0	0	0
FBgn0267127	56.2867	2.17309	4.50988	0.645694	3.36551	0.000764022	0.00321911	lncRNA:CR45567	0	0	0	0	0	0	0	0
FBgn0261284	273.144	2.16997	4.50014	0.319834	6.78466	1.16358e-11	1.9736e-10	bou	0	0	0	0	0	0	0	0
FBgn0266831	18.6609	2.16893	4.49689	0.568185	3.81729	0.000134923	0.000702517	lncRNA:CR45293	0	0	0	0	0	0	0	0
FBgn0041181	166.16	2.1681	4.49431	0.243333	8.91002	5.10222e-19	2.01227e-17	Tep3	0	0	0	0	0	0	0	0
FBgn0266778	11.8659	2.16549	4.48618	0.781208	2.77197	0.00557177	0.0180231	lncRNA:CR45243	0	0	0	0	0	0	0	0
FBgn0031548	370.892	2.16316	4.47894	0.236546	9.14478	5.97511e-20	2.59569e-18	CG8852	0	0	0	0	0	0	0	0
FBgn0264775	6.841	2.15959	4.46789	0.905168	2.38585	0.0170399	0.046248	CG44013	0	0	0	0	0	0	0	0
FBgn0085232	13.7135	2.15781	4.46237	0.699	3.087	0.0020219	0.00754091	CG34203	0	0	0	0	0	0	0	0
FBgn0036851	28.3827	2.1561	4.45709	0.557614	3.86666	0.000110337	0.000587749	CG14082	0	0	0	0	0	0	0	0
FBgn0001983	2.31109	2.47461	5.55817	1.68939	1.46479	0.142977	0.255557	wor	0	0	0	0	0	0	0	0
FBgn0032119	28.2354	2.1543	4.45154	0.470103	4.58262	4.59176e-06	3.34621e-05	CG3769	0	0	0	0	0	0	0	0
FBgn0039435	416.019	2.14791	4.43186	0.199267	10.779	4.32361e-27	3.27716e-25	TwdlP	0	0	0	0	0	0	0	0
FBgn0085411	119.468	2.14343	4.41812	0.245145	8.74355	2.25898e-18	8.19825e-17	CG34382	0	0	0	0	0	0	0	0
FBgn0085481	12.5279	2.14108	4.41093	0.73191	2.92534	0.00344084	0.0119453	CG34452	0	0	0	0	0	0	0	0
FBgn0010473	109.806	2.13435	4.39039	0.259863	8.21335	2.15109e-16	6.44133e-15	tutl	0	0	0	0	0	0	0	0
FBgn0031466	58.4612	2.13076	4.37949	0.374456	5.69029	1.26822e-08	1.45785e-07	CG3119	0	0	0	0	0	0	0	0
FBgn0034484	35.6023	2.1219	4.35266	0.448512	4.73097	2.23447e-06	1.7343e-05	CG11044	0	0	0	0	0	0	0	0
FBgn0026602	275.902	2.11622	4.33556	0.210648	10.0462	9.54401e-24	5.73942e-22	Ady43A	0	0	0	0	0	0	0	0
FBgn0038380	9.61054	2.1133	4.3268	0.854982	2.47175	0.0134454	0.0379664	CG14877	0	0	0	0	0	0	0	0
FBgn0034390	70.7228	2.1096	4.31571	0.387142	5.44916	5.06096e-08	5.23097e-07	CG15093	1	0	0	0	0	0	0	0
FBgn0039232	169.147	2.10427	4.2998	0.223512	9.41455	4.75104e-21	2.25954e-19	sosie	0	0	0	0	0	0	0	0
FBgn0039434	30.1477	2.10401	4.29901	0.478034	4.40137	1.07568e-05	7.18751e-05	TwdlM	0	0	0	0	0	0	0	0
FBgn0036836	115.377	2.10126	4.29085	0.309415	6.79109	1.11286e-11	1.89643e-10	CG11619	0	0	0	0	0	0	0	0
FBgn0031522	16.5515	2.41579	5.33612	1.19211	2.02648	0.0427158	0.0973599	CG3285	0	0	0	0	0	0	0	0
FBgn0036819	65.3835	2.09963	4.28599	0.417264	5.03189	4.85663e-07	4.28355e-06	Dysb	0	0	0	0	0	0	0	0
FBgn0036250	103.845	2.09628	4.27604	0.27398	7.6512	1.99111e-14	4.69638e-13	Ir68b	0	0	0	0	0	0	0	0
FBgn0034521	1486.05	2.09426	4.27007	0.277244	7.55384	4.2261e-14	9.67019e-13	Mgat1	0	0	0	0	0	0	0	0
FBgn0024294	443.937	2.08452	4.24133	0.218587	9.53634	1.47958e-21	7.2991e-20	Spn43Aa	0	0	0	0	0	0	0	0
FBgn0010424	467.332	2.08316	4.23734	0.233613	8.91713	4.78525e-19	1.89754e-17	TpnC73F	0	0	0	0	0	0	0	0
FBgn0013772	672.529	2.40253	5.2873	1.38397	1.73597	NA	NA	Cyp6a8	0	0	0	0	0	0	0	0
FBgn0037422	80.5998	2.0803	4.22895	0.384396	5.41187	6.23705e-08	6.31647e-07	Osi13	0	0	0	0	0	0	0	0
FBgn0286033	58.3097	2.07821	4.22284	0.443894	4.68178	2.84398e-06	2.16807e-05	lncRNA:CR46353	0	0	0	0	0	0	0	0
FBgn0015904	20.56	2.07718	4.21982	0.582015	3.56895	0.000358413	0.00165429	ara	0	0	0	0	0	0	0	0
FBgn0265900	23.6484	2.07685	4.21884	0.691937	3.0015	0.00268657	0.00964099	lncRNA:CR44689	0	0	0	0	0	0	0	0
FBgn0031375	25.8128	2.07227	4.20549	0.49598	4.17814	2.93908e-05	0.0001777	erm	0	0	0	0	0	0	0	0
FBgn0040607	32.4657	2.06906	4.19613	0.492272	4.20308	2.63311e-05	0.00016121	CG14244	0	0	0	0	0	0	0	0
FBgn0038130	358.309	2.0689	4.19566	0.284231	7.27894	3.36452e-13	6.9158e-12	CG8630	0	0	0	0	0	0	0	0
FBgn0031650	10.0946	2.06644	4.18852	0.808894	2.55465	0.0106294	0.0312252	CG14044	0	0	0	0	0	0	0	0
FBgn0053922	13.0052	2.05872	4.16616	0.739049	2.78563	0.00534238	0.0173952	CG33922	0	0	0	0	0	0	0	0
FBgn0284413	29.4556	2.05625	4.15904	0.478631	4.2961	1.73829e-05	0.000110565	lncRNA:TS4	0	0	0	0	0	0	0	0
FBgn0029810	44.0114	2.05604	4.15844	0.409636	5.01919	5.18898e-07	4.54911e-06	CG12239	0	0	0	0	0	0	0	0
FBgn0062928	416.308	2.0521	4.14709	0.191835	10.6972	1.049e-26	7.7888e-25	hpRNA:CR33940	0	0	0	0	0	0	0	0
FBgn0053493	226.603	2.05046	4.14237	0.362775	5.65214	1.5846e-08	1.79611e-07	CG33493	0	0	0	0	0	0	0	0
FBgn0263767	6329.68	2.05035	4.14206	0.270743	7.57303	3.64623e-14	8.39613e-13	lncRNA:CR43684	0	0	0	0	0	0	0	0
FBgn0031397	290.394	2.04347	4.12235	0.258093	7.91755	2.42244e-15	6.52848e-14	CG15385	0	0	0	0	0	0	0	0
FBgn0267235	45.4683	2.0429	4.12072	0.369351	5.53104	3.18336e-08	3.40392e-07	lncRNA:CR45675	0	0	0	0	0	0	0	0
FBgn0284414	9.02422	2.03593	4.10087	0.848569	2.39925	0.0164286	0.0448313	lncRNA:CR46328	0	0	0	0	0	0	0	0
FBgn0035612	37.9879	2.02885	4.0808	0.413828	4.90265	9.45547e-07	7.90382e-06	frm	0	0	0	0	0	0	0	0
FBgn0035978	1630.48	2.02266	4.06332	0.180198	11.2246	3.08697e-29	2.84333e-27	UGP	0	0	0	0	0	0	0	0
FBgn0038139	41.826	2.02262	4.0632	0.443196	4.5637	5.02597e-06	3.62992e-05	PK2-R2	0	0	0	0	0	0	0	0
FBgn0039073	36.4184	2.01541	4.04296	0.437759	4.60393	4.14588e-06	3.04568e-05	CG4408	0	0	0	0	0	0	0	0
FBgn0016123	2729.98	2.01367	4.03807	0.283632	7.09956	1.25154e-12	2.40603e-11	Alp4	0	0	0	0	0	0	0	0
FBgn0033139	67.8899	2.01261	4.0351	0.338943	5.93789	2.88718e-09	3.6347e-08	Tsp42Er	0	0	0	0	0	0	0	0
FBgn0030395	438.784	2.01213	4.03377	0.189487	10.6188	2.43556e-26	1.76342e-24	Mks1	0	0	0	0	0	0	0	0
FBgn0085234	37.1307	2.00945	4.02628	0.49114	4.09139	4.28787e-05	0.000250709	CG34205	0	0	0	0	0	0	0	0
FBgn0038452	24.8025	2.00762	4.02119	0.512449	3.9177	8.93961e-05	0.000487256	CG14905	0	0	0	0	0	0	0	0
FBgn0031182	131.54	2.00711	4.01976	0.332091	6.04385	1.50475e-09	1.96049e-08	Cyp6t1	0	0	0	0	0	0	0	0
FBgn0284417	23.3508	2.0005	4.00139	0.527258	3.79416	0.000148145	0.000762091	lncRNA:TS20	0	0	0	0	0	0	0	0
FBgn0031907	256.218	1.99702	3.99174	0.270284	7.3886	1.48388e-13	3.17573e-12	CG5171	0	0	0	0	0	0	0	0
FBgn0035670	16.7161	1.9967	3.99086	0.60937	3.27666	0.00105042	0.00426172	CG10472	0	0	0	0	0	0	0	0
FBgn0259213	218.903	1.99421	3.98399	0.213037	9.36088	7.90735e-21	3.71212e-19	side-II	0	0	0	0	0	0	0	0
FBgn0040609	75.2439	1.98887	3.96926	0.572917	3.47148	0.000517597	0.00228745	CG3348	0	0	0	0	0	0	0	0
FBgn0029686	100.171	1.98563	3.96036	0.386223	5.14115	2.73066e-07	2.51038e-06	Glos	0	0	0	0	0	0	0	0
FBgn0053639	48.6403	1.98483	3.95816	0.353345	5.61726	1.94009e-08	2.17353e-07	CG33639	0	0	0	0	0	0	0	0
FBgn0267008	33.28	1.9725	3.92447	0.43743	4.50929	6.50441e-06	4.55747e-05	lncRNA:CR45452	0	0	0	0	0	0	0	0
FBgn0036128	12.289	1.96619	3.90736	0.686423	2.8644	0.00417794	0.0141104	Elo68beta	0	0	0	0	0	0	0	0
FBgn0267145	10.4649	1.96529	3.9049	0.759522	2.58753	0.00966672	0.0289167	lncRNA:CR45585	0	0	0	0	0	0	0	0
FBgn0033508	13.2188	1.96408	3.90163	0.767811	2.55802	0.010527	0.0309995	Obp46a	0	0	0	0	0	0	0	0
FBgn0043806	198.774	1.96286	3.89834	0.328367	5.97764	2.26397e-09	2.88003e-08	CG32032	0	0	0	0	0	0	0	0
FBgn0016054	576.636	1.96244	3.89722	0.17716	11.0772	1.61774e-28	1.36087e-26	phr6-4	0	0	0	0	0	0	0	0
FBgn0033580	27.7825	1.96214	3.8964	0.511625	3.83512	0.000125503	0.000658416	CG13231	0	0	0	0	0	0	0	0
FBgn0052056	445.117	1.96072	3.89257	0.197883	9.90848	3.82423e-23	2.18251e-21	scramb1	0	0	0	0	0	0	0	0
FBgn0013973	22.7015	1.95868	3.88707	0.509199	3.8466	0.000119771	0.000631759	Gycbeta100B	0	0	0	0	0	0	0	0
FBgn0038838	13.026	1.94895	3.86094	0.678058	2.87431	0.00404907	0.0137293	TotB	0	0	0	0	0	1	0	0
FBgn0033216	14.4427	1.9445	3.84904	0.716243	2.71486	0.00663036	0.0209537	CG1946	0	0	0	0	0	0	0	0
FBgn0265543	14.7396	1.94361	3.84668	0.627536	3.09721	0.00195349	0.00731579	lncRNA:CR44393	0	0	0	0	0	0	0	0
FBgn0265548	183.27	1.93915	3.83479	0.22505	8.61653	6.90131e-18	2.39701e-16	lncRNA:CR44398	0	0	0	0	0	0	0	0
FBgn0036193	101.406	1.93709	3.82932	0.286394	6.76372	1.34493e-11	2.27062e-10	CG14135	0	0	0	0	0	0	0	0
FBgn0262004	223.175	1.93524	3.82442	0.321252	6.02407	1.70085e-09	2.19827e-08	CG42822	0	0	0	0	0	0	0	0
FBgn0051145	862.673	1.93299	3.81847	0.26932	7.17731	7.10979e-13	1.41544e-11	CG31145	0	0	0	0	0	0	0	0
FBgn0021742	3.99564	2.23792	4.71716	1.26874	1.76388	0.0777514	0.157044	C901	0	0	0	0	0	0	0	0
FBgn0039098	748.886	1.93172	3.81509	0.165077	11.7019	1.24589e-31	1.38408e-29	GILT3	0	0	0	0	0	0	0	0
FBgn0266347	90.6223	1.92891	3.80766	0.324942	5.93615	2.91787e-09	3.67016e-08	nAChRalpha4	0	0	0	0	0	0	0	0
FBgn0250910	57.9196	1.9246	3.79632	0.36299	5.30208	1.14493e-07	1.11751e-06	Octbeta3R	0	0	0	0	0	0	0	0
FBgn0034490	497.322	1.92107	3.78704	0.240279	7.99516	1.29401e-15	3.58018e-14	CG9864	0	0	0	0	0	0	0	0
FBgn0044047	365.415	1.9205	3.78553	0.186782	10.282	8.49414e-25	5.4697e-23	Ilp6	0	0	0	0	0	1	0	0
FBgn0032256	82.2378	1.9172	3.77689	0.305637	6.2728	3.54605e-10	4.98605e-09	RluA-2	0	0	0	0	0	0	0	0
FBgn0265180	467.095	1.91419	3.76903	0.217125	8.81607	1.18548e-18	4.43504e-17	CG44245	0	0	0	0	0	0	0	0
FBgn0025878	31.3791	1.91252	3.76467	0.429188	4.45614	8.34477e-06	5.71489e-05	wrapper	0	0	1	1	1	0	0	0
FBgn0051233	26.9283	1.9072	3.7508	0.513468	3.71435	0.000203728	0.00100914	CG31233	0	0	0	0	0	0	0	0
FBgn0034140	200.135	1.9002	3.73264	0.34176	5.56004	2.69716e-08	2.92269e-07	Lst	0	0	0	0	0	1	0	0
FBgn0264358	519.354	1.89943	3.73065	0.228952	8.29616	1.07527e-16	3.31535e-15	lncRNA:CR43810	0	0	0	0	0	0	0	0
FBgn0267181	10.1336	1.89557	3.72068	0.775639	2.44388	0.0145304	0.0405104	asRNA:CR45621	0	0	0	0	0	0	0	0
FBgn0265680	35.2806	1.89419	3.71713	0.40408	4.68767	2.76339e-06	2.11439e-05	lncRNA:CR44487	0	0	0	0	0	0	0	0
FBgn0050026	936.232	1.89409	3.71686	0.191171	9.90779	3.85075e-23	2.18906e-21	CG30026	0	0	0	0	0	0	0	0
FBgn0265657	25.671	1.89133	3.70976	0.677264	2.7926	0.00522866	0.0170956	lncRNA:CR44464	0	0	0	0	0	0	0	0
FBgn0041629	1012.23	1.8856	3.69505	0.246356	7.65394	1.94909e-14	4.61222e-13	Hexo2	0	0	0	0	0	0	0	0
FBgn0266690	31.7923	1.88535	3.69443	0.455117	4.14256	3.43446e-05	0.000203592	lncRNA:CR45180	0	0	0	0	0	0	0	0
FBgn0001075	305.824	1.88398	3.69092	0.265852	7.08658	1.37468e-12	2.63927e-11	ft	0	0	1	1	1	0	0	0
FBgn0027348	502.424	1.88092	3.68311	0.215138	8.74289	2.27229e-18	8.22603e-17	bgm	0	0	0	0	0	1	0	0
FBgn0051121	83.7558	1.88011	3.68104	0.4155	4.52494	6.04117e-06	4.27612e-05	CG31121	0	0	0	0	0	0	0	0
FBgn0263381	200.922	1.87817	3.67609	0.253807	7.40001	1.36171e-13	2.92286e-12	asRNA:CR43433	0	0	0	0	0	0	0	0
FBgn0267246	127.216	1.87696	3.67301	0.279644	6.71197	1.92018e-11	3.18274e-10	asRNA:CR45686	0	0	0	0	0	0	0	0
FBgn0054011	56.1414	1.87692	3.67291	0.368983	5.08675	3.64242e-07	3.28835e-06	CG34011	0	0	0	0	0	0	0	0
FBgn0033520	1927.96	1.87459	3.66697	0.192567	9.73475	2.14343e-22	1.13845e-20	Prx2540-1	1	0	0	0	0	0	0	0
FBgn0039321	321.648	1.87259	3.66189	0.358998	5.21615	1.82684e-07	1.72636e-06	CG10550	0	0	0	0	0	0	0	0
FBgn0283501	52.5303	1.86793	3.65009	0.366499	5.09669	3.45636e-07	3.12813e-06	lncRNA:CR46115	0	0	0	0	0	0	0	0
FBgn0037127	86.927	1.86691	3.64751	0.493231	3.78506	0.00015367	0.000787449	CG14566	0	0	0	0	0	0	0	0
FBgn0264352	142.972	1.86669	3.64695	0.789237	2.36519	0.018021	0.048436	lncRNA:CR43808	0	0	0	0	0	0	0	0
FBgn0004431	13.3724	1.86617	3.64564	0.685942	2.72059	0.00651647	0.0206296	LysX	0	0	0	0	0	0	0	0
FBgn0032692	70.5431	1.86203	3.6352	0.322378	5.77593	7.6527e-09	9.09141e-08	IFT46	0	0	0	0	0	0	0	0
FBgn0026439	189.838	1.86111	3.63287	0.383291	4.85561	1.20015e-06	9.77926e-06	Eaat1	0	0	0	0	0	0	0	0
FBgn0267561	24.568	1.85956	3.62898	0.490362	3.79222	0.000149305	0.000766431	lncRNA:CR45901	0	0	0	0	0	0	0	0
FBgn0267438	59.2083	1.85892	3.62735	0.401472	4.63025	3.65226e-06	2.72711e-05	lncRNA:CR45788	0	0	0	0	0	0	0	0
FBgn0051373	53.4476	1.85494	3.61736	0.747752	2.48069	0.0131129	0.0372482	CG31373	0	0	0	0	0	0	0	0
FBgn0003114	38.743	1.85282	3.61205	0.429561	4.31328	1.6085e-05	0.00010344	plu	0	0	0	0	0	0	0	0
FBgn0039808	34.4761	1.84329	3.58827	0.455004	4.05115	5.09664e-05	0.000292936	CG12071	0	0	0	0	0	0	0	0
FBgn0038972	355.135	1.84082	3.58214	0.246778	7.45942	8.69049e-14	1.90758e-12	CG7054	0	0	0	0	0	0	0	0
FBgn0030162	63.7816	1.83766	3.57431	0.445574	4.12426	3.7193e-05	0.000219315	CG1986	0	0	0	0	0	0	0	0
FBgn0030992	58.688	1.83674	3.57203	0.370042	4.96361	6.91944e-07	5.92694e-06	CG33253	0	0	0	0	0	0	0	0
FBgn0036678	1050.97	1.8358	3.5697	0.14639	12.5405	4.48074e-36	7.8564e-34	CG11905	0	0	0	0	0	0	0	0
FBgn0266958	18.7784	1.83454	3.56657	0.566326	3.23936	0.00119797	0.00477907	lncRNA:CR45409	0	0	0	0	0	0	0	0
FBgn0032684	74.9537	1.83315	3.56315	0.462165	3.96644	7.29531e-05	0.000405069	Ugt301D1	0	0	0	0	0	0	0	0
FBgn0287209	391.33	1.83282	3.56233	0.300245	6.10442	1.03173e-09	1.37877e-08	Gfat1	0	0	0	0	0	0	0	0
FBgn0037140	117.087	1.8311	3.55809	0.368323	4.97145	6.64531e-07	5.7123e-06	SLC22A	0	0	0	0	0	0	0	0
FBgn0085407	94.0637	1.82692	3.54778	0.390813	4.67465	2.94451e-06	2.23768e-05	Pvf3	0	0	0	0	0	0	0	0
FBgn0030465	647.214	1.8261	3.54578	0.28338	6.444	1.16366e-10	1.74946e-09	CG15743	0	0	0	0	0	0	0	0
FBgn0039916	99.8986	1.82556	3.54445	0.33466	5.45498	4.89783e-08	5.06957e-07	Ekar	0	0	0	0	0	0	0	0
FBgn0267139	86.3615	1.82457	3.54201	0.303421	6.01332	1.81767e-09	2.3368e-08	lncRNA:CR45579	0	0	0	0	0	0	0	0
FBgn0265060	91.0018	1.81966	3.52997	0.276231	6.58745	4.47445e-11	7.00933e-10	lncRNA:CR44171	0	0	0	0	0	0	0	0
FBgn0029761	128.41	1.81729	3.52418	0.353321	5.14344	2.69747e-07	2.48144e-06	SK	0	0	0	0	0	0	0	0
FBgn0031289	180.584	1.81723	3.52405	0.246134	7.38311	1.54632e-13	3.29964e-12	CG13950	0	0	0	0	0	0	0	0
FBgn0051337	34.729	1.81564	3.52016	0.413624	4.38959	1.13562e-05	7.5499e-05	CG31337	0	0	0	0	0	0	0	0
FBgn0267796	150.638	1.8125	3.5125	0.285325	6.3524	2.11976e-10	3.10385e-09	Tmc	0	0	0	0	0	0	0	0
FBgn0036433	455.767	1.81025	3.50704	0.241812	7.4862	7.08937e-14	1.57034e-12	CG9628	0	0	0	0	0	0	0	0
FBgn0000723	1517.86	1.8101	3.50666	0.161935	11.178	5.22788e-29	4.66756e-27	FER	0	0	0	0	0	0	0	0
FBgn0002562	1.87576	2.05939	4.1681	1.87601	1.09775	0.272314	0.416324	Lsp1alpha	0	0	0	0	0	0	0	0
FBgn0267671	567.391	1.80946	3.50511	0.220208	8.21705	2.08574e-16	6.25851e-15	lncRNA:CR46007	0	0	0	0	0	0	0	0
FBgn0260722	247.85	1.80734	3.49995	0.233232	7.7491	9.25463e-15	2.30227e-13	lncRNA:CR42549	0	0	0	0	0	0	0	0
FBgn0263587	400.817	1.80677	3.49859	0.349711	5.16648	2.38543e-07	2.20694e-06	lncRNA:CR43612	0	0	0	0	0	0	0	0
FBgn0031517	130.487	2.05326	4.15043	1.29332	1.58759	0.112379	0.211088	CG15406	0	0	0	0	0	0	0	0
FBgn0022800	47.0924	1.80461	3.49335	0.363934	4.95863	7.09923e-07	6.06665e-06	Cad96Ca	0	0	0	0	0	0	0	0
FBgn0046692	982.074	1.80449	3.49305	0.140637	12.8308	1.102e-37	2.0708e-35	Stlk	0	0	0	0	0	0	0	0
FBgn0013672	12167.1	1.80044	3.48327	0.587593	3.0641	0.00218325	0.00804376	mt:ATPase6	1	0	0	0	0	0	0	0
FBgn0017558	314.008	1.79815	3.47775	0.297282	6.04866	1.46059e-09	1.90808e-08	Pdk	1	0	0	0	0	0	0	0
FBgn0054010	18.4153	1.79534	3.47098	0.565072	3.17719	0.0014871	0.00575884	Glyat	0	0	0	0	0	0	0	0
FBgn0031184	39.8442	1.79488	3.46986	0.382274	4.69526	2.66267e-06	2.04484e-05	CG14615	0	0	0	0	0	0	0	0
FBgn0034286	35.0035	1.79372	3.46707	0.498007	3.60179	0.000316038	0.00148141	dpr13	0	0	0	0	0	0	0	0
FBgn0030817	224.855	1.79294	3.46521	0.24793	7.23165	4.77175e-13	9.67176e-12	CG4991	0	0	0	0	0	0	0	0
FBgn0052082	326.888	1.79115	3.4609	0.20341	8.8056	1.30151e-18	4.8442e-17	IRSp53	0	0	0	0	0	0	0	0
FBgn0016675	20.5324	1.78846	3.45447	0.726253	2.46259	0.0137937	0.0388127	Lectin-galC1	0	0	0	0	0	0	0	0
FBgn0263257	26.2384	1.78788	3.45307	0.545553	3.27719	0.00104847	0.00425499	Cngl	0	0	0	0	0	0	0	0
FBgn0038506	223.487	1.78611	3.44884	0.343376	5.20162	1.97557e-07	1.85248e-06	CG5860	0	0	0	1	0	0	0	1
FBgn0266302	87.6386	1.78607	3.44873	0.319863	5.58385	2.35254e-08	2.58194e-07	lncRNA:CR44967	0	0	0	0	0	0	0	0
FBgn0259236	167.577	1.78306	3.44155	0.310505	5.74245	9.33143e-09	1.09077e-07	comm3	0	0	0	0	0	0	0	0
FBgn0011693	108.396	2.0087	4.02419	0.923528	2.17502	0.0296283	0.072516	Pdh	0	0	0	0	0	0	0	0
FBgn0031692	142.396	1.78262	3.44049	0.342255	5.20844	1.90432e-07	1.78912e-06	TpnC25D	0	0	0	0	0	0	0	0
FBgn0033648	13.4225	1.78215	3.43938	0.698276	2.55221	0.0107043	0.0313881	Ir48b	0	0	0	0	0	0	0	0
FBgn0040923	15.837	1.78204	3.43911	0.680824	2.61747	0.00885843	0.0268689	CG11368	0	0	0	0	0	0	0	0
FBgn0004187	111.24	1.77618	3.42517	0.262725	6.76058	1.37442e-11	2.31772e-10	snRNA:U1:95Cc	0	0	0	0	0	0	0	0
FBgn0003996	840.275	1.77472	3.42172	0.143521	12.3656	4.01068e-35	6.50001e-33	w	0	0	0	0	0	0	0	0
FBgn0030341	2335.46	1.77126	3.41352	0.240253	7.37248	1.67482e-13	3.553e-12	p24-1	0	0	0	0	0	0	0	0
FBgn0032801	365.586	1.76739	3.40437	0.269377	6.56101	5.3443e-11	8.29863e-10	CG10165	0	0	0	0	0	0	0	0
FBgn0001269	388.31	1.76698	3.40341	0.173352	10.193	2.13023e-24	1.33052e-22	inv	0	0	0	0	0	0	0	0
FBgn0032815	455.378	1.76685	3.40309	0.182375	9.68799	3.3914e-22	1.769e-20	CG10462	0	0	0	0	0	0	0	0
FBgn0000277	5.31948	1.97952	3.94362	1.10854	1.78569	0.0741487	0.151451	CecA2	0	0	0	0	0	0	0	0
FBgn0267435	196.853	1.76362	3.39548	0.314628	5.6054	2.0778e-08	2.31355e-07	chp	0	0	0	0	0	0	0	0
FBgn0043364	391.61	1.76063	3.38847	0.240769	7.31253	2.62161e-13	5.44877e-12	cbt	0	0	0	0	0	0	0	0
FBgn0052641	41.473	1.75999	3.38697	0.390026	4.51251	6.4066e-06	4.50027e-05	CG32641	0	0	0	0	0	0	0	0
FBgn0035873	24.8526	1.75932	3.38538	0.481824	3.65137	0.000260845	0.00125573	CG13670	0	0	0	0	0	0	0	0
FBgn0265551	180.421	1.75873	3.384	0.223295	7.87625	3.37349e-15	8.89391e-14	lncRNA:CR44401	0	0	0	0	0	0	0	0
FBgn0034538	119.838	1.75839	3.38321	0.357908	4.91298	8.97024e-07	7.54153e-06	CG16799	0	0	0	0	0	0	0	0
FBgn0038262	21.8189	1.75646	3.37869	0.529636	3.31636	0.000911973	0.00376937	CG14857	0	0	0	0	0	0	0	0
FBgn0259244	465.939	1.75366	3.37214	0.236511	7.41473	1.2187e-13	2.63143e-12	CG42342	0	0	0	0	0	0	0	0
FBgn0037697	73.1442	1.75204	3.36835	0.304475	5.75429	8.70049e-09	1.02608e-07	GstZ2	1	0	0	0	0	0	0	0
FBgn0033138	317.648	1.75086	3.36558	0.215452	8.12643	4.4211e-16	1.27659e-14	Tsp42Eq	0	0	0	0	0	0	0	0
FBgn0034417	6527.14	1.74894	3.36111	0.227841	7.67612	1.63973e-14	3.92484e-13	CG15117	0	0	0	0	0	0	0	0
FBgn0263049	33.2078	1.74813	3.35923	0.417492	4.18722	2.82393e-05	0.000171737	lncRNA:let7C	0	0	0	0	0	0	0	0
FBgn0000473	283.798	1.94034	3.83795	1.02849	1.88659	0.0592153	0.126136	Cyp6a2	0	0	0	0	0	0	0	0
FBgn0001234	974.673	1.74704	3.3567	0.223989	7.79969	6.20601e-15	1.58172e-13	lncRNA:Hsromega	0	0	1	1	1	1	0	0
FBgn0031653	48.3943	1.74433	3.35039	0.396671	4.39743	1.09542e-05	7.3127e-05	Jon25Biii	0	0	0	0	0	0	0	0
FBgn0036381	205.227	1.74162	3.3441	0.229958	7.57363	3.62934e-14	8.3705e-13	CG8745	0	0	0	0	0	0	0	0
FBgn0004780	13.4515	1.93492	3.82356	0.826908	2.33994	0.0192867	0.0512096	Ccp84Ad	0	0	0	0	0	0	0	0
FBgn0039748	24.0913	1.73851	3.3369	0.523694	3.31971	0.00090111	0.00372765	CG15529	0	0	0	0	0	0	0	0
FBgn0262005	25.2742	1.73558	3.33013	0.707044	2.4547	0.0141004	0.0395153	CG42823	0	0	0	0	0	0	0	0
FBgn0040322	40.432	1.73327	3.3248	0.44553	3.89035	0.000100101	0.000538148	GNBP2	0	0	0	0	0	0	0	0
FBgn0040340	2292.33	1.73203	3.32195	0.224909	7.70103	1.34969e-14	3.2628e-13	TRAM	0	0	0	0	0	0	0	0
FBgn0039776	717.018	1.7314	3.32049	0.216415	8.00035	1.24068e-15	3.44573e-14	PH4alphaEFB	0	0	0	0	0	0	0	0
FBgn0038512	175.94	1.72934	3.31576	0.26523	6.52016	7.0233e-11	1.07816e-09	CG14330	0	0	0	0	0	0	0	0
FBgn0034392	913.427	1.7272	3.31085	0.225932	7.64478	2.09298e-14	4.91276e-13	MFS15	0	0	0	0	0	0	0	0
FBgn0267930	111.355	1.72622	3.3086	0.256195	6.73791	1.60681e-11	2.68472e-10	lncRNA:CR46211	0	0	0	0	0	0	0	0
FBgn0265949	22.9828	1.72304	3.30132	0.491135	3.50829	0.000450994	0.00202197	lncRNA:CR44736	0	0	0	0	0	0	0	0
FBgn0263076	14.6462	1.72298	3.30119	0.612044	2.81513	0.00487572	0.016076	Klp54D	0	0	0	0	0	0	0	0
FBgn0085753	72.4751	1.72284	3.30086	0.411632	4.18539	2.84674e-05	0.000172835	28SrRNA-Psi:CR40596	0	0	0	0	0	0	0	0
FBgn0032891	126.774	1.7211	3.29688	0.29841	5.76757	8.04227e-09	9.52312e-08	Oseg5	0	0	0	0	0	0	0	0
FBgn0019650	41.5399	1.72063	3.29579	0.421364	4.08347	4.43687e-05	0.000258382	toy	0	0	0	0	0	0	0	0
FBgn0034512	1393.89	1.72048	3.29547	0.209771	8.20173	2.36961e-16	7.02341e-15	CG18067	0	0	0	0	0	0	0	0
FBgn0264914	185.915	1.71884	3.29171	0.273402	6.28683	3.24007e-10	4.60027e-09	lncRNA:CR44105	0	0	0	0	0	0	0	0
FBgn0028546	861.913	1.71488	3.28269	0.236882	7.23939	4.50719e-13	9.14827e-12	ics	0	0	0	0	0	1	0	0
FBgn0003861	26.8031	1.71472	3.28232	0.55315	3.09992	0.00193576	0.00725873	trp	0	0	0	0	0	1	0	0
FBgn0264436	42.1114	1.71389	3.28045	0.40619	4.21944	2.44915e-05	0.000150836	lncRNA:CR43854	0	0	0	0	0	0	0	0
FBgn0051221	12.9323	1.71235	3.27694	0.721338	2.37385	0.0176035	0.0474767	CG31221	0	0	0	0	0	0	0	0
FBgn0039324	5576.13	1.70963	3.27077	0.215939	7.9172	2.42917e-15	6.5345e-14	CG10553	0	0	0	0	0	0	0	0
FBgn0263388	182.127	1.70393	3.25786	0.318978	5.34184	9.20088e-08	9.13372e-07	lncRNA:CR43440	0	0	0	0	0	0	0	0
FBgn0031461	95.0497	1.70327	3.25638	0.486313	3.50242	0.000461061	0.00206329	daw	0	0	0	0	0	0	1	0
FBgn0038774	57.8307	1.70305	3.25588	0.343973	4.9511	7.37945e-07	6.29503e-06	CG5023	0	0	0	0	0	0	0	0
FBgn0051313	1027.76	1.70213	3.2538	0.234068	7.27193	3.54397e-13	7.27439e-12	CG31313	0	0	0	0	0	0	0	0
FBgn0040392	11.3714	1.7019	3.25329	0.676694	2.51502	0.0119026	0.0343396	CG14050	0	0	0	0	0	0	0	0
FBgn0063499	48.7204	1.70011	3.24926	0.385763	4.40714	1.04746e-05	7.01642e-05	GstE10	0	0	0	0	0	0	0	0
FBgn0000625	87.1032	1.69987	3.24871	0.378543	4.49055	7.10383e-06	4.93942e-05	eyg	0	0	0	0	0	0	0	0
FBgn0027600	42.4755	1.69933	3.2475	0.387981	4.37993	1.18715e-05	7.87091e-05	obst-B	0	0	0	0	0	0	0	0
FBgn0028482	282.238	1.69554	3.23897	0.243504	6.96306	3.3295e-12	6.10254e-11	bdl	0	0	0	0	0	0	0	0
FBgn0034933	950.234	1.69547	3.23882	0.145489	11.6536	2.1992e-31	2.42462e-29	CG3735	0	0	0	0	0	0	0	0
FBgn0000658	6.56806	1.86106	3.63275	0.934556	1.99139	0.0464382	0.10386	fj	0	0	0	0	0	0	0	0
FBgn0037850	43.4288	1.69176	3.23049	0.44602	3.793	0.000148839	0.000764848	CG14695	0	0	0	0	0	0	0	0
FBgn0267073	22.1701	1.68904	3.22442	0.66935	2.5234	0.0116225	0.0336981	lncRNA:CR45517	0	0	0	0	0	0	0	0
FBgn0031741	2043.89	1.68817	3.22248	0.237376	7.1118	1.14536e-12	2.21655e-11	CG11034	0	0	0	0	0	0	0	0
FBgn0266419	211.488	1.68705	3.21997	0.336381	5.01529	5.29532e-07	4.63118e-06	lncRNA:CR45059	0	0	0	0	0	0	0	0
FBgn0031470	41.3957	1.68537	3.21622	0.382325	4.40821	1.0423e-05	6.98693e-05	CG18557	0	0	0	0	0	0	0	0
FBgn0039595	107.919	1.68373	3.21256	0.255482	6.59038	4.38716e-11	6.88741e-10	AstA-R2	0	0	0	0	0	0	0	0
FBgn0033367	125.376	1.67841	3.20075	0.237154	7.07731	1.46981e-12	2.80026e-11	PPO2	0	0	0	0	0	0	0	0
FBgn0020307	146.244	1.67764	3.19905	0.348023	4.82049	1.43205e-06	1.15015e-05	dve	0	0	0	0	0	0	0	0
FBgn0033188	1199.22	1.67609	3.1956	0.219047	7.65173	1.98301e-14	4.68485e-13	Drat	0	0	0	0	0	0	0	0
FBgn0267828	1197.79	1.67599	3.19539	0.25283	6.62893	3.38127e-11	5.42531e-10	Fatp1	0	0	0	0	0	0	0	0
FBgn0002773	4000.32	1.6757	3.19474	0.196235	8.53924	1.35107e-17	4.53045e-16	Mlc2	0	0	0	0	0	0	0	0
FBgn0259749	1544.36	1.67474	3.19262	0.144483	11.5913	4.56287e-31	4.74311e-29	mmy	0	0	0	0	0	0	0	0
FBgn0037486	5254.53	1.67383	3.19061	0.126601	13.2214	6.60561e-40	1.39321e-37	CG14605	0	0	0	0	0	0	0	0
FBgn0019660	85.4406	1.67363	3.19017	0.290895	5.7534	8.74658e-09	1.02985e-07	lncRNA:roX2	0	0	0	0	0	0	0	0
FBgn0033250	43.7109	1.67065	3.18358	0.550836	3.03294	0.00242185	0.00879372	CG14762	0	0	0	0	0	0	0	0
FBgn0262533	29.9618	1.66824	3.17826	0.468851	3.55814	0.000373489	0.00171193	CR43087	0	0	0	0	0	0	0	0
FBgn0052580	380.463	1.66637	3.17415	0.309719	5.38025	7.43804e-08	7.47554e-07	Muc14A	0	0	0	0	0	0	0	0
FBgn0038930	76.4869	1.66498	3.1711	0.368553	4.51762	6.25382e-06	4.40096e-05	BomT3	0	0	0	0	0	0	0	0
FBgn0267134	54.4557	1.66491	3.17094	0.358383	4.64561	3.39066e-06	2.54746e-05	lncRNA:CR45574	0	0	0	0	0	0	0	0
FBgn0262886	48.8759	1.66377	3.16843	0.415238	4.00678	6.15513e-05	0.000347866	lncRNA:CR43241	0	0	0	0	0	0	0	0
FBgn0041246	232.209	1.66136	3.16316	0.18964	8.76063	1.94163e-18	7.09962e-17	Gr32a	0	0	0	0	0	0	0	0
FBgn0267602	93.63	1.66012	3.16042	0.270016	6.14821	7.836e-10	1.0559e-08	lncRNA:CR45940	0	0	0	0	0	0	0	0
FBgn0052365	292.456	1.65958	3.15926	0.246347	6.73677	1.61941e-11	2.70267e-10	CG32365	0	0	0	0	0	0	0	0
FBgn0030096	598.116	1.65513	3.14952	0.168324	9.833	8.11609e-23	4.52542e-21	Zpr1	0	0	0	0	0	0	0	0
FBgn0000044	8372.79	1.65486	3.14893	0.180935	9.14619	5.89785e-20	2.5698e-18	Act57B	0	0	0	0	0	0	0	0
FBgn0058002	21.4696	1.65168	3.14199	0.557597	2.96213	0.00305517	0.0107813	ND-AGGG	1	1	0	0	0	0	0	0
FBgn0036101	55.7841	1.65077	3.14	0.424067	3.8927	9.91353e-05	0.000533549	NijA	0	0	0	1	0	0	0	0
FBgn0261963	24.5245	1.64956	3.13737	0.496156	3.32467	0.000885218	0.0036692	mid	0	0	0	0	0	0	0	0
FBgn0266824	205.744	1.64904	3.13626	0.210438	7.83626	4.64159e-15	1.20194e-13	lncRNA:CR45286	0	0	0	0	0	0	0	0
FBgn0026396	5.61828	1.80381	3.49142	1.03103	1.74952	0.0802004	0.161121	Or22c	0	0	0	0	0	0	0	0
FBgn0015316	246.626	1.64702	3.13186	0.192758	8.54449	1.29103e-17	4.36938e-16	Try29F	0	0	0	0	0	0	0	0
FBgn0039684	18.789	1.80011	3.48247	1.02888	1.74959	0.0801891	0.161121	Obp99d	0	0	0	0	0	0	0	0
FBgn0004513	44.3753	1.64554	3.12866	0.403822	4.07492	4.603e-05	0.000267308	Mdr65	0	0	0	0	0	0	0	0
FBgn0030352	351.719	1.64513	3.12776	0.163888	10.0381	1.03634e-23	6.18109e-22	sicily	1	0	0	0	0	0	0	0
FBgn0013308	83.2407	1.6432	3.12359	0.27983	5.87216	4.30152e-09	5.29611e-08	Odc2	0	0	0	0	0	0	0	0
FBgn0259817	13.202	1.6423	3.12163	0.65158	2.52049	0.0117192	0.0338997	SteXh:CG42398	0	0	0	0	0	0	0	0
FBgn0002569	21.9677	1.6412	3.11926	0.573929	2.85959	0.0042419	0.0142899	Mal-A2	0	0	0	0	0	0	0	0
FBgn0032331	84.3551	1.63836	3.11311	0.383133	4.27621	1.90101e-05	0.000119706	CG14913	0	0	0	0	0	0	0	0
FBgn0262801	1545.29	1.63744	3.11114	0.259992	6.29804	3.01425e-10	4.31331e-09	twr	0	0	0	0	0	0	0	0
FBgn0267642	46.9898	1.63431	3.1044	0.371921	4.39425	1.11156e-05	7.41184e-05	lncRNA:CR45980	0	0	0	0	0	0	0	0
FBgn0001174	13.1486	1.63188	3.09916	0.644637	2.53147	0.0113587	0.0330606	halo	0	0	0	0	0	0	0	0
FBgn0023178	52.04	1.63011	3.09536	0.357598	4.55848	5.1524e-06	3.70469e-05	Pdf	0	0	0	0	0	0	0	0
FBgn0000477	74.9887	1.62758	3.08994	0.347705	4.68091	2.85601e-06	2.17496e-05	DNaseII	0	0	1	1	1	0	0	0
FBgn0031894	61.9202	1.62705	3.08881	0.328755	4.94913	7.45452e-07	6.35162e-06	CG4496	0	0	0	0	0	0	0	0
FBgn0032895	140.338	1.62566	3.08584	0.256502	6.33782	2.33039e-10	3.39481e-09	twit	0	0	0	0	0	0	0	0
FBgn0038829	1933.78	1.62546	3.08541	0.210602	7.71818	1.17998e-14	2.88125e-13	CG17271	0	0	0	0	0	0	0	0
FBgn0086608	16.801	1.62413	3.08257	0.565222	2.87345	0.00406022	0.0137639	CG34112	0	0	0	0	0	0	0	0
FBgn0029804	496.352	1.62312	3.08041	0.220211	7.37077	1.69639e-13	3.58832e-12	CG3097	0	0	0	0	0	0	0	0
FBgn0001320	48.6152	1.62004	3.07384	0.339815	4.76742	1.86599e-06	1.47106e-05	kni	0	0	0	0	0	0	0	0
FBgn0035710	165.043	1.61641	3.06612	0.260765	6.19875	5.6913e-10	7.8359e-09	SP1173	0	0	0	0	0	0	0	0
FBgn0030479	579.599	1.61572	3.06465	0.218387	7.39842	1.37811e-13	2.95369e-12	Rbp1-like	0	0	0	0	0	0	0	0
FBgn0031579	58.7003	1.61429	3.0616	0.579683	2.78477	0.00535653	0.0174276	CG15422	0	0	0	0	0	0	0	0
FBgn0039690	255.448	1.61305	3.05897	0.282504	5.70983	1.13089e-08	1.30722e-07	Gnpnat	0	0	0	0	0	0	0	0
FBgn0038732	13.0016	1.60906	3.05052	0.635684	2.53122	0.0113666	0.0330666	CG11391	0	0	0	0	0	0	0	0
FBgn0011584	5331.65	1.60856	3.04948	0.2332	6.89777	5.28234e-12	9.43238e-11	Trp1	0	0	0	0	0	0	0	0
FBgn0005585	18984.3	1.60764	3.04753	0.228859	7.02459	2.14689e-12	4.02108e-11	Calr	0	0	0	0	0	1	0	0
FBgn0030805	320.795	1.60641	3.04494	0.337992	4.75281	2.00612e-06	1.57556e-05	wus	0	0	0	0	0	0	0	0
FBgn0034255	22.9036	1.60134	3.03426	0.492878	3.24897	0.00115825	0.00464481	Oxp	0	0	0	0	0	0	0	0
FBgn0034143	816.61	1.6002	3.03185	0.312251	5.12471	2.9799e-07	2.7155e-06	CG8303	0	0	0	0	0	0	0	0
FBgn0037975	57.6405	1.59803	3.0273	0.343461	4.65272	3.2758e-06	2.47137e-05	CG3397	0	0	0	0	0	0	0	0
FBgn0036622	343.143	1.59756	3.02632	0.352473	4.53245	5.83047e-06	4.15121e-05	Agpat4	0	0	0	0	0	0	0	0
FBgn0037114	14.3131	1.59743	3.02604	0.607164	2.63097	0.00851405	0.0259759	Cpr78E	0	0	0	0	0	0	0	0
FBgn0036144	446.867	1.59633	3.02373	0.252252	6.32831	2.47854e-10	3.59265e-09	GlcAT-P	0	0	0	0	0	0	0	0
FBgn0030306	3283.03	1.59556	3.02212	0.251808	6.33642	2.35169e-10	3.419e-09	Spase25	0	0	0	0	0	0	0	0
FBgn0030396	60.9436	1.59353	3.01787	0.363307	4.38617	1.15362e-05	7.66253e-05	CG2556	0	0	0	0	0	0	0	0
FBgn0265045	750.497	1.59299	3.01674	0.221671	7.18629	6.65772e-13	1.32726e-11	Strn-Mlck	0	0	0	0	0	0	0	0
FBgn0085241	20.7925	1.59147	3.01355	0.561338	2.83513	0.00458069	0.0152094	CG34212	0	0	0	0	0	0	0	0
FBgn0033887	643.125	1.59145	3.01352	0.204199	7.79363	6.51128e-15	1.65085e-13	St4	0	0	0	0	0	0	0	0
FBgn0036667	423.427	1.58969	3.00986	0.268687	5.91653	3.28796e-09	4.11433e-08	kud	0	0	0	0	0	0	0	0
FBgn0263659	59.1962	1.58961	3.00967	0.358865	4.42954	9.44334e-06	6.40097e-05	lncRNA:CR43650	0	0	0	0	0	0	0	0
FBgn0004893	478.52	1.58633	3.00284	0.186932	8.4861	2.13682e-17	7.09981e-16	bowl	0	0	0	0	0	0	0	0
FBgn0286818	23154.5	1.58452	2.99908	0.237054	6.68423	2.32147e-11	3.80454e-10	Pdi	0	0	0	0	0	0	0	0
FBgn0047135	5138.06	1.5833	2.99655	0.246973	6.41084	1.44719e-10	2.16232e-09	CG32276	0	0	0	0	0	1	0	0
FBgn0042094	6936.82	1.58186	2.99356	0.14222	11.1226	9.73881e-29	8.38632e-27	Adk3	1	0	0	0	0	0	0	0
FBgn0283471	1255.99	1.5815	2.9928	0.226089	6.99501	2.65244e-12	4.90483e-11	wupA	0	0	0	0	0	0	0	0
FBgn0023550	57.8084	1.57974	2.98916	0.348771	4.52944	5.91398e-06	4.1963e-05	FarO	0	0	0	0	0	0	0	0
FBgn0032442	15.0623	1.57869	2.98699	0.654651	2.41151	0.0158868	0.0436804	Nepl7	0	0	0	0	0	0	0	0
FBgn0052057	200.74	1.57451	2.97834	0.21786	7.22714	4.93269e-13	9.94259e-12	dpr10	0	0	0	0	0	0	0	0
FBgn0033115	49.9308	1.57427	2.97786	0.423754	3.71507	0.000203151	0.00100697	Spn42De	0	0	0	0	0	0	0	0
FBgn0038846	416.451	1.57378	2.97684	0.189035	8.32532	8.40983e-17	2.62073e-15	CG5697	0	0	0	0	0	0	0	0
FBgn0051495	198.066	1.57263	2.97446	0.196142	8.01779	1.07669e-15	3.0249e-14	CG31495	0	0	0	0	0	0	0	0
FBgn0036547	562.234	1.57182	2.9728	0.200617	7.83495	4.69026e-15	1.21239e-13	CG17032	0	0	0	0	0	0	0	0
FBgn0033429	254.525	1.57128	2.97169	0.203646	7.71576	1.20262e-14	2.92181e-13	CG12929	0	0	0	0	0	0	0	0
FBgn0034828	53.638	1.56576	2.96034	0.349302	4.48255	7.37572e-06	5.10728e-05	CG13545	0	0	0	0	0	0	0	0
FBgn0034137	92.7155	1.56461	2.95797	0.273018	5.73079	9.99614e-09	1.16472e-07	CG4945	0	0	0	0	0	0	0	0
FBgn0266396	19.1689	1.56036	2.94927	0.56246	2.77417	0.00553433	0.0179294	lncRNA:CR45036	0	0	0	0	0	0	0	0
FBgn0034990	13.4467	1.55653	2.94145	0.643419	2.41915	0.0155567	0.0429188	CG11406	0	0	0	0	0	0	0	0
FBgn0036806	77.9262	1.55533	2.93901	0.30951	5.02514	5.03062e-07	4.42093e-06	Cyp12c1	0	0	0	0	0	0	0	0
FBgn0265458	312.311	1.55463	2.93758	0.198142	7.84601	4.29468e-15	1.11608e-13	asRNA:CR44358	0	0	0	0	0	0	0	0
FBgn0033397	1197.48	1.55162	2.93145	0.219015	7.08453	1.39514e-12	2.67503e-11	Cyp4p3	0	0	0	0	0	0	0	0
FBgn0016131	60.6909	1.54927	2.9267	0.316459	4.89566	9.79785e-07	8.14446e-06	Cdk4	0	0	0	0	0	0	0	0
FBgn0014850	7.51111	1.7011	3.25148	0.860959	1.97582	0.0481753	0.106969	Eig71Ej	0	0	0	0	0	0	0	0
FBgn0035543	13.2562	1.54906	2.92627	0.621693	2.49168	0.012714	0.0363012	CG15020	0	0	0	0	0	0	0	0
FBgn0051288	604.886	1.54348	2.91497	0.147439	10.4686	1.2045e-25	8.11531e-24	CG31288	0	0	0	0	0	0	0	0
FBgn0031602	94.4797	1.54319	2.91439	0.311009	4.96189	6.98112e-07	5.97273e-06	CG15431	0	0	0	0	0	0	0	0
FBgn0038071	78.3564	1.53926	2.90645	0.284114	5.41775	6.03547e-08	6.12085e-07	Dtg	0	0	0	0	0	0	0	0
FBgn0261698	315.666	1.53352	2.89491	0.235742	6.50507	7.76554e-11	1.1871e-09	SLO2	0	0	0	0	0	0	0	0
FBgn0023097	1282.58	1.53309	2.89405	0.16703	9.17851	4.37111e-20	1.94534e-18	bon	0	0	0	0	0	0	0	0
FBgn0051704	43.6164	1.53179	2.89144	0.565823	2.70719	0.00678564	0.0213887	CG31704	0	0	0	0	0	0	0	0
FBgn0036351	195.015	1.53084	2.88954	0.234481	6.52862	6.63798e-11	1.02225e-09	CG14107	0	0	0	0	0	0	0	0
FBgn0004512	1178.05	1.52753	2.88291	0.250008	6.10992	9.96786e-10	1.33575e-08	Mdr49	0	0	0	0	0	0	0	0
FBgn0010241	17.3746	1.52676	2.88139	0.571045	2.67363	0.00750353	0.0232586	Mdr50	0	0	0	0	0	0	0	0
FBgn0033234	93.4424	1.52528	2.87843	0.31319	4.87015	1.11513e-06	9.16342e-06	MFS12	0	0	0	0	0	0	0	0
FBgn0027657	3938.63	1.52497	2.87782	0.236683	6.44312	1.1704e-10	1.75777e-09	glob1	0	0	0	0	0	0	0	0
FBgn0028573	30.0812	1.52408	2.87604	0.456812	3.33635	0.000848874	0.00352962	prc	0	0	0	0	0	0	0	0
FBgn0051719	105.238	1.52227	2.87242	0.30106	5.05636	4.27329e-07	3.80362e-06	RluA-1	0	0	0	0	0	0	0	0
FBgn0266417	237.024	1.52131	2.87052	0.203697	7.4685	8.11138e-14	1.78315e-12	ringer	0	0	0	0	0	0	0	0
FBgn0034736	221.717	1.52099	2.86988	0.333393	4.56216	5.0631e-06	3.65312e-05	gas	0	0	0	0	0	0	0	0
FBgn0261862	1152.18	1.51928	2.86647	0.251161	6.04901	1.45742e-09	1.90696e-08	whd	1	0	0	0	0	0	0	0
FBgn0035771	2175.66	1.51789	2.86372	0.207531	7.31406	2.5919e-13	5.39627e-12	Sec63	0	0	0	0	0	0	0	0
FBgn0266256	103.265	1.51748	2.8629	0.276657	5.48503	4.13391e-08	4.34374e-07	lncRNA:CR44951	0	0	0	0	0	0	0	0
FBgn0004087	116.939	1.51727	2.86249	0.26873	5.64607	1.64156e-08	1.85912e-07	Dhfr	1	0	0	0	0	0	0	0
FBgn0030028	60.5194	1.51719	2.86234	0.309906	4.89566	9.79759e-07	8.14446e-06	Corp	0	0	1	1	1	1	0	0
FBgn0050197	276.301	1.51685	2.86165	0.229449	6.61082	3.82203e-11	6.07891e-10	CG30197	0	0	0	0	0	0	0	0
FBgn0037447	700.828	1.51499	2.85797	0.2308	6.56408	5.2355e-11	8.14019e-10	Neurochondrin	0	0	0	0	0	0	0	0
FBgn0052022	2279.73	1.51325	2.85452	0.143875	10.5178	7.15053e-26	4.97902e-24	CG32022	0	0	0	0	0	0	0	0
FBgn0035206	858.831	1.51261	2.85325	0.206518	7.32433	2.40092e-13	5.01299e-12	sturkopf	0	0	0	0	0	0	0	0
FBgn0266038	54.0991	1.50575	2.83972	0.339891	4.4301	9.41914e-06	6.38754e-05	lncRNA:CR44803	0	0	0	0	0	0	0	0
FBgn0030616	7367.77	1.50573	2.83969	0.221357	6.80226	1.0299e-11	1.76747e-10	RpL37a	0	0	0	0	0	0	0	0
FBgn0036698	38.1602	1.50522	2.83869	0.390229	3.85728	0.000114654	0.000606748	CG7724	0	0	0	0	0	0	0	0
FBgn0031902	123.017	1.50365	2.8356	0.305371	4.92402	8.47836e-07	7.14864e-06	Wnt6	0	0	0	0	0	0	0	0
FBgn0019643	498.74	1.50329	2.83489	0.180739	8.31748	8.98549e-17	2.78818e-15	AANAT1	0	0	0	0	0	0	0	0
FBgn0029709	2328.88	1.5011	2.83059	0.24861	6.03798	1.56052e-09	2.02408e-08	CHOp24	0	0	0	0	0	0	0	0
FBgn0266897	17.154	1.50038	2.82917	0.62333	2.40704	0.0160824	0.0440684	lncRNA:CR45357	0	0	0	0	0	0	0	0
FBgn0260855	1704.61	1.4993	2.82706	0.208342	7.19636	6.18426e-13	1.23626e-11	Sec22	0	0	0	0	0	0	0	0
FBgn0019925	2793.81	1.49833	2.82516	0.226682	6.60982	3.84787e-11	6.10665e-10	Surf4	0	0	0	0	0	0	0	0
FBgn0264834	20.5037	1.49745	2.82342	0.543861	2.75336	0.00589871	0.018925	lncRNA:CR44042	0	0	0	0	0	0	0	0
FBgn0031998	1788.45	1.4968	2.82215	0.214727	6.97068	3.15412e-12	5.7957e-11	SLC5A11	0	0	0	0	0	0	0	0
FBgn0285955	2402.77	1.49521	2.81906	0.231894	6.44784	1.13458e-10	1.70751e-09	cv-c	0	0	0	0	0	0	0	0
FBgn0034741	125.558	1.4936	2.8159	0.242282	6.16471	7.06116e-10	9.58593e-09	CG4269	0	0	0	0	0	0	0	0
FBgn0051157	49.3149	1.49189	2.81256	0.407412	3.66186	0.00025039	0.00121061	CG31157	0	0	0	0	0	0	0	0
FBgn0085736	41.2025	1.49038	2.80963	0.494591	3.01335	0.00258377	0.00931655	CG40472	1	1	0	0	0	0	0	0
FBgn0260753	220.19	1.4903	2.80947	0.2369	6.29081	3.15814e-10	4.5015e-09	Pdfr	0	0	0	0	0	0	0	0
FBgn0027788	24.3669	1.49025	2.80939	0.477566	3.12052	0.00180532	0.00682942	Hey	0	0	0	0	0	0	0	0
FBgn0083970	26.2617	1.48802	2.80503	0.486075	3.06129	0.00220382	0.00811339	CG34134	0	0	0	0	0	0	0	0
FBgn0286937	13.4471	1.48509	2.79934	0.621812	2.38832	0.0169256	0.0459634	lncRNA:CR46431	0	0	0	0	0	0	0	0
FBgn0053179	16.2774	1.47836	2.78632	0.616084	2.39961	0.0164126	0.044796	beat-IIIb	0	0	0	0	0	0	0	0
FBgn0039840	90.9288	1.47764	2.78492	0.283111	5.21929	1.79608e-07	1.69839e-06	pHCl-2	0	0	0	0	0	0	0	1
FBgn0266446	500.102	1.47714	2.78396	0.218695	6.75432	1.43511e-11	2.41169e-10	CG45076	0	0	0	0	0	0	0	0
FBgn0032187	457.475	1.47612	2.78199	0.276927	5.33034	9.80278e-08	9.68499e-07	CG4839	0	0	0	0	0	0	0	0
FBgn0263852	1588.15	1.47586	2.7815	0.208475	7.07932	1.44865e-12	2.77032e-11	Dad1	0	0	0	0	0	0	0	0
FBgn0261341	659.001	1.47512	2.78007	0.166763	8.84561	9.10328e-19	3.45901e-17	verm	0	0	0	0	0	0	0	0
FBgn0036205	268.844	1.47507	2.77996	0.238838	6.176	6.57466e-10	8.97571e-09	CG14131	0	0	0	0	0	0	0	0
FBgn0041224	28.9501	1.47436	2.77861	0.430773	3.4226	0.000620256	0.00268409	Gr97a	0	0	0	0	0	0	0	0
FBgn0038541	52.4306	1.47411	2.77811	0.39847	3.69942	0.000216094	0.00106208	TyrRII	0	0	0	0	0	0	0	0
FBgn0030029	69.8468	1.47361	2.77717	0.368681	3.99699	6.41531e-05	0.000361029	CG15343	0	0	0	0	0	0	0	0
FBgn0040491	613.126	1.47321	2.77638	0.24355	6.0489	1.45842e-09	1.90696e-08	Buffy	1	0	1	1	1	1	1	0
FBgn0052694	190.239	1.47299	2.77597	0.262111	5.61973	1.91259e-08	2.14437e-07	CG32694	0	0	0	0	0	0	0	0
FBgn0030432	199.278	1.47068	2.77152	0.252071	5.83437	5.39928e-09	6.55891e-08	CG4404	0	0	0	0	0	0	0	0
FBgn0051710	151.581	1.46982	2.76988	0.23153	6.34829	2.17715e-10	3.17476e-09	CG31710	0	0	0	0	0	0	0	0
FBgn0261363	81.3625	1.46467	2.75999	0.306934	4.77193	1.82471e-06	1.44007e-05	PPO3	0	0	0	0	0	0	0	0
FBgn0031906	92.1609	1.46282	2.75647	0.277069	5.27963	1.29446e-07	1.25337e-06	CG5160	0	0	0	0	0	0	0	0
FBgn0034247	473.832	1.46249	2.75584	0.311769	4.69094	2.71947e-06	2.08406e-05	CG6484	0	0	0	0	0	0	0	0
FBgn0039313	246.755	1.46233	2.75553	0.414845	3.525	0.00042349	0.00190984	CG11892	0	0	0	0	0	0	0	0
FBgn0035733	30.6407	1.46176	2.75444	0.426379	3.42831	0.000607347	0.00263528	CG8641	0	0	0	0	0	0	0	0
FBgn0032184	21.1837	1.46158	2.75409	0.528268	2.76674	0.00566205	0.0182664	CG13135	0	0	0	0	0	0	0	0
FBgn0264877	111.697	1.4608	2.7526	0.303536	4.8126	1.48978e-06	1.19191e-05	lncRNA:CR44068	0	0	0	0	0	0	0	0
FBgn0033204	1662.52	1.45965	2.75042	0.193124	7.55808	4.09047e-14	9.37459e-13	CG2065	0	0	0	0	0	0	0	0
FBgn0011281	4.23449	1.59468	3.02027	1.20273	1.32589	0.184878	0.310864	Obp83a	0	0	0	0	0	0	0	0
FBgn0031550	142.727	1.45711	2.74558	0.221957	6.56485	5.20869e-11	8.10717e-10	IFT57	0	0	1	1	1	0	0	0
FBgn0264344	2094.23	1.4566	2.74462	0.147258	9.89153	4.5306e-23	2.56552e-21	CG43800	0	0	0	0	0	0	0	0
FBgn0031688	629.712	1.45389	2.73945	0.162781	8.93153	4.20144e-19	1.6844e-17	Cyp28d2	0	0	0	0	0	0	0	0
FBgn0051436	47.4072	1.45268	2.73716	0.356257	4.07762	4.54999e-05	0.000264546	CG31436	0	0	0	0	0	0	0	0
FBgn0033448	931.839	1.44986	2.73181	0.229834	6.30827	2.8217e-10	4.05773e-09	hebe	0	0	0	0	0	0	0	0
FBgn0002772	1882.79	1.44881	2.72983	0.185624	7.80509	5.94575e-15	1.52071e-13	Mlc1	0	0	0	0	0	0	0	0
FBgn0034136	21.828	1.44871	2.72964	0.497431	2.91239	0.00358678	0.0123517	DAT	0	0	0	0	0	0	0	0
FBgn0034761	306.005	1.4486	2.72943	0.302291	4.79205	1.65083e-06	1.30995e-05	CG4250	0	0	0	0	0	0	0	0
FBgn0032285	366.581	1.44124	2.71555	0.337615	4.2689	1.96442e-05	0.000123331	CG17108	0	0	0	0	0	0	0	0
FBgn0265640	20.0011	1.43853	2.71044	0.550546	2.61292	0.00897732	0.0271955	lncRNA:CR44447	0	0	0	0	0	0	0	0
FBgn0031453	890.314	1.43508	2.70397	0.175129	8.1944	2.51847e-16	7.44945e-15	Bacc	0	0	0	0	0	0	0	0
FBgn0010198	5525.91	1.43444	2.70277	0.222387	6.45017	1.11727e-10	1.6832e-09	RpS15Aa	0	0	0	0	0	0	0	0
FBgn0041233	36.1417	1.4332	2.70045	0.432988	3.31003	0.000932872	0.0038481	Gr59e	0	0	0	0	0	0	0	0
FBgn0020617	17.6099	1.43092	2.69619	0.607598	2.35505	0.0185203	0.0495301	Rx	0	0	0	0	0	0	0	0
FBgn0053514	19.6322	1.43049	2.69539	0.593287	2.41113	0.0159032	0.0437172	CG33514	0	0	0	0	0	0	0	0
FBgn0035611	246.059	1.42806	2.69084	0.237133	6.02219	1.72075e-09	2.22201e-08	CG13285	0	0	0	0	0	0	0	0
FBgn0265158	276.446	1.42792	2.69058	0.317575	4.49631	6.91429e-06	4.81914e-05	CG44227	0	0	0	0	0	0	0	0
FBgn0051522	466.942	1.42607	2.68715	0.267248	5.33615	9.4941e-08	9.39916e-07	CG31522	0	0	0	0	0	0	0	0
FBgn0032820	206.388	1.42478	2.68473	0.240435	5.92583	3.10725e-09	3.90162e-08	fbp	0	0	0	0	0	0	0	0
FBgn0038833	2.13021	1.56739	2.96367	1.50182	1.04365	0.296645	0.443475	CG15696	0	0	0	0	0	0	0	0
FBgn0026263	177.262	1.42253	2.68055	0.205919	6.90819	4.90884e-12	8.79782e-11	bip1	0	0	0	0	0	0	0	0
FBgn0000015	208.914	1.42234	2.68019	0.273666	5.19735	2.02149e-07	1.8931e-06	Abd-B+H383A1H4:H14565	0	0	1	1	1	0	0	0
FBgn0000448	3.50326	1.56239	2.95343	1.20021	1.30176	0.192999	0.321416	Hr3	0	0	0	0	0	0	0	0
FBgn0034321	48.4554	1.42112	2.67793	0.353328	4.0221	5.76819e-05	0.000327397	CG14502	0	0	0	0	0	0	0	0
FBgn0028862	56.1793	1.42041	2.67661	0.348815	4.07209	4.65924e-05	0.000270359	dao	0	0	0	0	0	0	0	0
FBgn0011509	592.214	1.41799	2.67212	0.231789	6.11757	9.50123e-10	1.27439e-08	SrpRbeta	0	0	0	0	0	0	0	0
FBgn0085475	40.6206	1.41659	2.66954	0.399309	3.5476	0.000388753	0.0017713	CG34446	0	0	0	0	0	0	0	0
FBgn0000241	256.497	1.4156	2.6677	0.265227	5.3373	9.43423e-08	9.34625e-07	bw	0	0	0	0	0	0	0	0
FBgn0033867	44.1488	1.41548	2.66749	0.390549	3.62435	0.000289692	0.00137549	Cpr50Ca	0	0	0	0	0	0	0	0
FBgn0024740	577.3	1.41003	2.65743	0.20718	6.80583	1.00471e-11	1.72831e-10	Lip2	0	0	0	0	0	0	0	0
FBgn0030164	34.636	1.40987	2.65713	0.431474	3.26757	0.00108476	0.00438392	CG1889	0	0	0	0	0	0	0	0
FBgn0053276	21.9431	1.40904	2.6556	0.523441	2.69188	0.00710505	0.0222126	Urm1	0	0	0	0	0	1	0	0
FBgn0267539	138.519	1.40805	2.65378	0.241452	5.83161	5.48961e-09	6.65752e-08	CR45879	0	0	0	0	0	0	0	0
FBgn0004053	6.9908	1.53723	2.90237	0.859347	1.78884	0.0736409	0.150687	zen	0	0	0	0	0	0	0	0
FBgn0261801	25.8084	1.4066	2.65111	0.48263	2.91444	0.00356329	0.0122854	CG42747	0	0	0	0	0	0	0	0
FBgn0262789	236.494	1.40466	2.64756	0.242348	5.79606	6.78923e-09	8.13868e-08	CR43170	0	0	0	0	0	0	0	0
FBgn0052069	258.434	1.40329	2.64504	0.238099	5.89371	3.77627e-09	4.69709e-08	CG32069	0	0	0	0	0	0	0	0
FBgn0038830	328.252	1.40288	2.64429	0.273435	5.13058	2.88845e-07	2.64208e-06	CG17272	0	0	0	0	0	0	0	0
FBgn0027790	27.8412	1.40172	2.64216	0.571944	2.45079	0.0142542	0.0398695	GV1	0	0	0	0	0	0	0	0
FBgn0267640	50.0422	1.39704	2.6336	0.350729	3.98324	6.79825e-05	0.000380227	lncRNA:CR45978	0	0	0	0	0	0	0	0
FBgn0051475	405.872	1.39492	2.62975	0.193389	7.21305	5.4711e-13	1.09822e-11	CG31475	0	0	0	0	0	0	0	0
FBgn0267922	28.912	1.39272	2.62574	0.449853	3.09595	0.00196184	0.00734516	lncRNA:CR46203	0	0	0	0	0	0	0	0
FBgn0085220	382.477	1.39207	2.62456	0.262072	5.31179	1.08555e-07	1.06384e-06	Ufm1	0	0	0	0	0	1	0	0
FBgn0039172	4089.53	1.39165	2.62379	0.222701	6.24897	4.13158e-10	5.77887e-09	Spase22-23	0	0	0	0	0	0	0	0
FBgn0036208	361.654	1.38986	2.62053	0.221245	6.28198	3.34282e-10	4.72311e-09	CG10361	1	0	0	0	0	0	0	0
FBgn0264569	168.834	1.38896	2.6189	0.220986	6.28528	3.27268e-10	4.63301e-09	lncRNA:CR43941	0	0	0	0	0	0	0	0
FBgn0004573	75.7312	1.38726	2.61582	0.329127	4.21498	2.49801e-05	0.000153715	5-HT7	0	0	0	0	0	0	0	0
FBgn0002945	132.3	1.38687	2.6151	0.244205	5.6791	1.35402e-08	1.54549e-07	nkd	0	0	0	0	0	0	0	0
FBgn0039316	656.929	1.38523	2.61214	0.204082	6.78762	1.14002e-11	1.93591e-10	CG11893	0	0	0	0	0	0	0	0
FBgn0032249	268.133	1.38513	2.61195	0.245903	5.63282	1.77287e-08	1.9985e-07	TBC1D16	0	0	0	0	0	0	0	0
FBgn0036847	186.692	1.38509	2.61189	0.262681	5.27292	1.34273e-07	1.29324e-06	CNPYb	0	0	0	0	0	0	0	0
FBgn0262786	601.26	1.38474	2.61125	0.143088	9.67753	3.75673e-22	1.94024e-20	CG43167	0	0	0	0	0	0	0	0
FBgn0004169	2553.78	1.38445	2.61073	0.209438	6.61033	3.83474e-11	6.09247e-10	up	0	0	0	0	0	0	0	0
FBgn0033196	417.42	1.38053	2.60364	0.248672	5.55162	2.83038e-08	3.05341e-07	CG1358	0	0	0	0	0	0	0	0
FBgn0032798	165.847	1.3793	2.60141	0.293008	4.70736	2.50941e-06	1.93429e-05	CG10132	0	0	0	0	0	0	0	0
FBgn0040849	268.922	1.37815	2.59934	0.19144	7.19887	6.07155e-13	1.2154e-11	Ir41a	0	0	0	0	0	0	0	0
FBgn0010497	25.4249	1.37715	2.59755	0.565945	2.43336	0.0149593	0.0415146	dmGlut	0	0	0	0	0	0	0	0
FBgn0023529	7011.95	1.37697	2.59723	0.244429	5.63343	1.76656e-08	1.99293e-07	CG2918	0	0	1	1	1	1	0	0
FBgn0051912	39.3251	1.37644	2.59627	0.426286	3.22891	0.00124265	0.00492356	asRNA:CR31912	0	0	0	0	0	0	0	0
FBgn0000577	200	1.37482	2.59335	0.226907	6.05895	1.37015e-09	1.80287e-08	en	0	0	1	1	1	0	0	0
FBgn0042207	19.2743	1.37476	2.59325	0.571054	2.40741	0.0160663	0.044049	CG18530	0	0	0	0	0	0	0	0
FBgn0032914	23.7339	1.37215	2.58857	0.492595	2.78556	0.00534346	0.0173952	CG14397	0	0	0	0	0	0	0	0
FBgn0029936	124.3	1.36919	2.58325	0.297189	4.60713	4.0826e-06	3.00223e-05	CG4617	0	0	0	0	0	0	0	0
FBgn0035876	55.3584	1.36906	2.58302	0.328612	4.16618	3.09753e-05	0.000185967	Pex2	0	0	0	0	0	0	0	0
FBgn0020508	4.77541	1.49721	2.82296	1.0142	1.47624	0.139879	0.251408	Ag5r2	0	0	0	0	0	0	0	0
FBgn0086680	50.9279	1.36882	2.5826	0.503363	2.71936	0.00654086	0.0206978	vvl	0	0	0	0	0	0	0	0
FBgn0033308	23.7428	1.36869	2.58236	0.511439	2.67616	0.00744714	0.0231023	CG8736	0	0	0	0	0	0	0	0
FBgn0265676	47.0975	1.36796	2.58105	0.443103	3.08722	0.00202038	0.00753914	lncRNA:CR44483	0	0	0	0	0	0	0	0
FBgn0033733	41.8447	1.36742	2.58009	0.390517	3.50157	0.00046253	0.00206923	CG8834	0	0	0	0	0	0	0	0
FBgn0051673	203.985	1.36424	2.5744	0.242596	5.62351	1.8712e-08	2.1012e-07	CG31673	0	0	0	0	0	0	0	0
FBgn0036337	483.655	1.36276	2.57176	0.214589	6.35052	2.14584e-10	3.13224e-09	AdenoK	0	0	0	0	0	0	0	0
FBgn0036596	19.3313	1.36126	2.56909	0.569282	2.39119	0.0167939	0.0456571	CG13045	0	0	0	0	0	0	0	0
FBgn0069923	113.939	1.3597	2.56631	0.335056	4.05813	4.94679e-05	0.000285224	CG41128	1	0	0	0	0	0	0	0
FBgn0024913	55.096	1.35863	2.56441	0.332214	4.08962	4.32071e-05	0.000252528	Actbeta	0	0	0	0	0	0	0	0
FBgn0038290	200.004	1.35634	2.56036	0.192963	7.02905	2.0795e-12	3.9049e-11	CG6912	0	0	0	0	0	0	0	0
FBgn0037521	34.755	1.35632	2.56031	0.478391	2.83517	0.00458016	0.0152094	CG2993	0	0	0	0	0	0	0	0
FBgn0264339	75.8379	1.35408	2.55634	0.361744	3.74319	0.000181697	0.000912119	CG43795	0	0	0	0	0	0	0	0
FBgn0259222	114.233	1.35383	2.5559	0.274459	4.93274	8.10848e-07	6.85664e-06	CG42322	0	0	0	0	0	0	0	0
FBgn0265842	94.0585	1.35348	2.55528	0.333863	4.05399	5.03507e-05	0.000289855	lncRNA:CR44631	0	0	0	0	0	0	0	0
FBgn0030912	28.9776	1.35236	2.55329	0.449431	3.00904	0.00262076	0.00942424	CG6023	0	0	0	0	0	0	0	0
FBgn0063449	48.1845	1.34963	2.54847	0.354997	3.80181	0.00014364	0.000741011	Uhg2	0	0	0	0	0	0	0	0
FBgn0032783	308.119	1.34911	2.54754	0.304811	4.42605	9.59748e-06	6.49034e-05	CG10237	0	0	0	0	0	0	0	0
FBgn0037730	44.2313	1.34881	2.54702	0.415804	3.24386	0.00117921	0.00471718	CG9444	0	0	0	0	0	0	0	0
FBgn0030327	1131.96	1.34853	2.54652	0.244599	5.51322	3.52323e-08	3.73986e-07	FucT6	0	0	0	0	0	0	0	0
FBgn0031471	31.3743	1.34719	2.54415	0.484054	2.78313	0.0053837	0.0175044	CG3117	0	0	0	0	0	0	0	0
FBgn0000303	12.6792	1.47234	2.77471	0.639248	2.30323	0.0212657	0.0554227	ChAT	0	0	0	0	0	0	0	0
FBgn0061492	857.77	1.34459	2.53958	0.231894	5.79829	6.6995e-09	8.04437e-08	loj	0	0	0	0	0	0	0	0
FBgn0033494	143.33	1.34438	2.53921	0.241541	5.56584	2.60889e-08	2.84186e-07	KCNQ	0	0	0	0	0	0	0	0
FBgn0263001	87.6279	1.34176	2.5346	0.266969	5.02589	5.01099e-07	4.40901e-06	CR43309	0	0	0	0	0	0	0	0
FBgn0085195	108.884	1.34144	2.53405	0.45134	2.97214	0.00295736	0.0104818	CG34166	0	0	0	0	0	0	0	0
FBgn0038339	31.6343	1.34049	2.53237	0.469871	2.85289	0.0043324	0.0145337	CG6118	0	0	0	0	0	0	0	0
FBgn0026878	46.8059	1.34031	2.53206	0.415058	3.22921	0.00124132	0.00491965	CG4325	0	0	0	0	0	0	0	0
FBgn0266784	82.4915	1.33971	2.531	0.307962	4.35024	1.35986e-05	8.90239e-05	lncRNA:CR45249	0	0	0	0	0	0	0	0
FBgn0033993	30.1959	1.33907	2.52988	0.451586	2.96526	0.00302427	0.0106831	CG8089	0	0	0	0	0	0	0	0
FBgn0031245	788.628	1.33875	2.52932	0.244268	5.48066	4.23736e-08	4.44282e-07	CG3625	0	0	0	0	0	0	0	0
FBgn0040238	369.699	1.33653	2.52543	0.186701	7.15867	8.14648e-13	1.60427e-11	Best1	0	0	0	0	0	0	0	0
FBgn0040602	46.0051	1.33604	2.52457	0.375517	3.55786	0.000373884	0.00171266	CG14545	0	0	0	0	0	0	0	0
FBgn0037399	18.2607	1.33536	2.52339	0.537333	2.48517	0.012949	0.0368781	Or83c	0	0	0	0	0	0	0	0
FBgn0000278	1.90956	1.45296	2.73769	1.84313	0.788312	0.430514	0.581283	CecB	0	0	0	0	0	0	0	0
FBgn0035696	1748.32	1.33532	2.52331	0.24007	5.5622	2.66397e-08	2.88888e-07	Best2	0	0	0	0	0	0	0	0
FBgn0267982	19.3193	1.33386	2.52077	0.522619	2.55227	0.0107024	0.0313881	lncRNA:CR46249	0	0	0	0	0	0	0	0
FBgn0039291	610.428	1.33367	2.52043	0.177775	7.50203	6.28369e-14	1.40687e-12	CG13663	0	0	0	0	0	0	0	0
FBgn0051676	669.361	1.33012	2.51424	0.220952	6.01995	1.7447e-09	2.24696e-08	CG31676	0	0	0	0	0	0	0	0
FBgn0032400	5817.48	1.32954	2.51322	0.245479	5.41609	6.09177e-08	6.17364e-07	CG6770	0	0	0	0	0	0	0	0
FBgn0004117	1282.86	1.32942	2.51301	0.196713	6.75816	1.39751e-11	2.35121e-10	Tm2	0	0	0	0	0	0	0	0
FBgn0054056	192.011	1.32935	2.51289	0.309686	4.29257	1.76618e-05	0.000112046	CG34056	0	0	0	0	0	0	0	0
FBgn0037624	4.71909	1.4383	2.71001	1.36033	1.05732	0.290366	0.436314	CG8223	0	0	0	0	0	0	0	0
FBgn0033968	39.8276	1.32818	2.51085	0.420614	3.15771	0.00159011	0.00609291	hui	0	0	0	0	0	0	0	0
FBgn0036948	104.275	1.32597	2.50702	0.319411	4.1513	3.30587e-05	0.000197173	CG7298	0	0	0	0	0	0	0	0
FBgn0010423	533.148	1.32346	2.50266	0.19824	6.67606	2.45458e-11	4.00915e-10	TpnC47D	0	0	0	0	0	0	0	0
FBgn0035166	199.628	1.32231	2.50066	0.198763	6.65268	2.87806e-11	4.65382e-10	JMJD5	0	0	0	0	0	0	0	0
FBgn0038420	424.585	1.32079	2.49802	0.179607	7.35376	1.92706e-13	4.05546e-12	CG10311	0	0	0	0	0	0	0	0
FBgn0051612	18.0118	1.32009	2.49683	0.54463	2.42384	0.0153574	0.0424494	CG31612	0	0	0	0	0	0	0	0
FBgn0039937	80.1268	1.31967	2.49608	0.311467	4.23694	2.26588e-05	0.00014044	fd102C	0	0	0	0	0	0	0	0
FBgn0283659	49.7759	1.31918	2.49525	0.354691	3.71924	0.000199819	0.00099282	THG	0	0	0	0	0	0	0	0
FBgn0001218	24942.5	1.31916	2.49521	0.222545	5.9276	3.07386e-09	3.86304e-08	Hsc70-3	0	0	0	0	0	1	0	0
FBgn0000078	468.442	1.31896	2.49486	0.314379	4.19546	2.72324e-05	0.000166169	Amy-d	0	0	0	0	0	0	0	0
FBgn0052068	474.216	1.31785	2.49294	0.196938	6.69167	2.20639e-11	3.6323e-10	Adi1	0	0	0	0	0	0	0	0
FBgn0263316	414.965	1.31401	2.48632	0.221219	5.93985	2.85291e-09	3.6009e-08	Mrp4	0	0	0	0	0	0	0	0
FBgn0032523	5.18135	1.41813	2.67239	1.0833	1.30909	0.190504	0.318521	CG16956	0	0	0	0	0	0	0	0
FBgn0037008	218.764	1.31291	2.48441	0.273705	4.79679	1.61225e-06	1.28074e-05	mTerf3	1	0	0	0	0	0	0	0
FBgn0039774	854.018	1.31255	2.48381	0.176631	7.43104	1.07745e-13	2.34731e-12	CDase	0	0	0	0	0	0	0	0
FBgn0024150	141.731	1.31144	2.48189	0.274792	4.77248	1.81967e-06	1.43688e-05	Ac78C	0	0	0	0	0	0	0	0
FBgn0002577	52.9693	1.30988	2.47921	0.42464	3.08469	0.00203765	0.00759187	m	0	0	0	0	0	0	0	0
FBgn0003450	42.8121	1.30964	2.4788	0.410227	3.19249	0.00141054	0.00549894	snk	0	0	0	0	0	0	0	0
FBgn0264385	33.6274	1.30891	2.47755	0.442641	2.95706	0.00310593	0.0109286	lncRNA:CR43837	0	0	0	0	0	0	0	0
FBgn0267399	44.3753	1.30658	2.47354	0.348909	3.74476	0.000180569	0.000907086	lncRNA:CR45761	0	0	0	0	0	0	0	0
FBgn0051997	389.076	1.30399	2.4691	0.219168	5.94971	2.68616e-09	3.39633e-08	CG31997	0	0	0	0	0	0	0	0
FBgn0001180	33.8973	1.30238	2.46636	0.487364	2.67231	0.0075332	0.0233307	hb	0	0	0	0	0	0	0	0
FBgn0041707	48.5851	1.30131	2.46453	0.377584	3.44641	0.000568085	0.00248194	7B2	0	0	0	0	0	0	0	0
FBgn0004514	17.3143	1.30028	2.46277	0.53853	2.4145	0.0157567	0.0433883	Oct-TyrR	0	0	0	0	0	0	0	0
FBgn0265191	539.647	1.30015	2.46254	0.205153	6.33745	2.33592e-10	3.39946e-09	Gyg	0	0	0	0	0	0	0	0
FBgn0052354	206.621	1.29987	2.46206	0.232064	5.60134	2.12699e-08	2.36471e-07	CG32354	0	0	0	0	0	0	0	0
FBgn0034198	770.504	1.29951	2.46145	0.169745	7.65565	1.92333e-14	4.56611e-13	CG11400	0	0	0	0	0	0	0	0
FBgn0265414	108.86	1.29943	2.46132	0.253381	5.12838	2.92249e-07	2.66987e-06	lncRNA:CR44326	0	0	0	0	0	0	0	0
FBgn0263413	42.7599	1.2993	2.4611	0.387974	3.34894	0.000811219	0.00339536	lncRNA:CR43459	0	0	0	0	0	0	0	0
FBgn0058172	529.52	1.29879	2.46023	0.161056	8.06422	7.37021e-16	2.09899e-14	lncRNA:CR40172	0	0	0	0	0	0	0	0
FBgn0266968	76.8662	1.29828	2.45935	0.324246	4.00398	6.22848e-05	0.000351603	lncRNA:CR45419	0	0	0	0	0	0	0	0
FBgn0069973	44.1696	1.29629	2.45596	0.374976	3.45699	0.000546247	0.0023966	CG40485	0	0	0	0	0	0	0	0
FBgn0267797	135.812	1.2955	2.45463	0.234768	5.51823	3.42436e-08	3.64022e-07	lncRNA:CR46122	0	0	0	0	0	0	0	0
FBgn0037207	110.231	1.29501	2.45378	0.264106	4.90337	9.42085e-07	7.88394e-06	Mes2	0	0	0	0	0	0	0	0
FBgn0266730	789.541	1.295	2.45377	0.145783	8.88306	6.50462e-19	2.52431e-17	lncRNA:CR45203	0	0	0	0	0	0	0	0
FBgn0028743	161.718	1.29375	2.45164	0.286367	4.51781	6.24839e-06	4.39927e-05	Dhit	0	0	0	0	0	0	0	0
FBgn0011770	347.707	1.29234	2.44926	0.285016	4.53429	5.77986e-06	4.11921e-05	Gip	0	0	0	0	0	0	0	0
FBgn0266676	161.648	1.29208	2.4488	0.226621	5.70147	1.18777e-08	1.3697e-07	lncRNA:CR45166	0	0	0	0	0	0	0	0
FBgn0039629	89.0079	1.29	2.44528	0.32679	3.94749	7.89756e-05	0.000435683	CG11842	0	0	0	0	0	1	0	0
FBgn0000566	1274.09	1.28979	2.44492	0.209212	6.16498	7.0493e-10	9.57875e-09	Eip55E	0	0	0	0	0	0	0	0
FBgn0000459	192.856	1.28978	2.44491	0.209431	6.15852	7.34302e-10	9.94074e-09	disco	0	0	0	0	0	0	0	0
FBgn0262976	145.294	1.28786	2.44166	0.296935	4.33717	1.44328e-05	9.37259e-05	lawc	0	0	0	0	0	0	0	0
FBgn0039085	102.214	1.28673	2.43974	0.265862	4.83984	1.29941e-06	1.05291e-05	Ugt303B3	0	0	0	0	0	0	0	0
FBgn0036419	27.0518	1.286	2.43852	0.530742	2.42303	0.0153917	0.0425201	CG13482	0	0	0	0	0	0	0	0
FBgn0032715	164.864	1.28224	2.43217	0.218841	5.85926	4.64943e-09	5.70516e-08	CG17597	0	0	0	0	0	0	0	0
FBgn0265052	42.2052	1.28213	2.43197	0.509088	2.51848	0.0117864	0.0340601	St3	0	0	0	0	0	0	0	0
FBgn0262559	1936.59	1.28201	2.43177	0.201615	6.35871	2.03458e-10	2.99084e-09	Mdh2	1	0	0	1	1	0	0	0
FBgn0014343	158.204	1.28147	2.43086	0.256877	4.98864	6.08049e-07	5.26096e-06	mirr	0	0	0	0	0	0	0	0
FBgn0030362	6279.11	1.28017	2.42868	0.253713	5.04575	4.51739e-07	4.00132e-06	regucalcin	0	0	0	0	0	0	0	0
FBgn0053977	249.803	1.27799	2.42501	0.214684	5.95292	2.63406e-09	3.33335e-08	CG33977	0	0	0	0	0	0	0	0
FBgn0266579	1483.45	1.27778	2.42465	0.134934	9.46963	2.80833e-21	1.36232e-19	tau	0	0	0	1	0	0	0	0
FBgn0039101	24.0247	1.27352	2.41751	0.518702	2.45521	0.0140803	0.0394743	CG16710	0	0	0	0	0	0	0	0
FBgn0004403	4515.97	1.27253	2.41585	0.198486	6.41121	1.44373e-10	2.15937e-09	RpS14a	0	0	0	0	0	0	0	0
FBgn0014464	3.20499	1.36424	2.57441	1.26136	1.08156	0.279446	0.42402	Cp7Fa	0	0	0	0	0	0	0	0
FBgn0086368	148.819	1.2716	2.41429	0.261185	4.86857	1.12409e-06	9.21625e-06	tw	0	0	0	0	0	0	0	0
FBgn0036373	962.126	1.2687	2.40944	0.136877	9.26886	1.8815e-20	8.58355e-19	Tgi	0	0	0	0	0	0	0	0
FBgn0266821	42.0661	1.26861	2.40929	0.385982	3.28671	0.00101366	0.0041333	lncRNA:CR45283	0	0	0	0	0	0	0	0
FBgn0039282	275.213	1.26632	2.40548	0.191362	6.61744	3.65481e-11	5.83206e-10	Bili	0	0	0	0	0	0	0	0
FBgn0260995	27.6563	1.2652	2.40361	0.511149	2.47521	0.0133156	0.0376642	dpr21	0	0	0	0	0	0	0	0
FBgn0010412	6797.24	1.26409	2.40175	0.204896	6.16942	6.85394e-10	9.34821e-09	RpS19a	0	0	0	0	0	0	0	0
FBgn0035435	197.414	1.26285	2.39969	0.208642	6.0527	1.42435e-09	1.86913e-08	PIG-C	0	0	0	0	0	0	0	0
FBgn0036152	359.165	1.26138	2.39724	0.168522	7.48492	7.15908e-14	1.58338e-12	CG6175	0	0	0	0	0	0	0	0
FBgn0025712	36.42	1.26037	2.39557	0.392572	3.21054	0.00132485	0.00520253	CG13920	0	0	0	0	0	0	0	0
FBgn0052647	75.6834	1.25856	2.39257	0.35294	3.56593	0.000362568	0.00166871	CG32647	0	0	0	0	0	0	0	0
FBgn0039641	37.4612	1.2582	2.39198	0.427554	2.94279	0.00325265	0.0113679	CG14511	0	0	0	0	0	0	0	0
FBgn0036300	451.926	1.25696	2.38991	0.216379	5.80905	6.28272e-09	7.56264e-08	Pmm2	0	0	0	0	0	1	0	0
FBgn0267339	27.6276	1.25578	2.38796	0.449072	2.79639	0.00516773	0.0169192	p38c	0	0	0	0	0	1	0	0
FBgn0037179	20.429	1.25537	2.38729	0.502264	2.49942	0.0124395	0.0355803	CG14453	0	0	0	0	0	0	0	0
FBgn0053548	80.1694	1.25423	2.3854	0.300111	4.17923	2.925e-05	0.000176996	SmydA-8	0	0	0	0	0	0	0	0
FBgn0267290	110.099	1.25115	2.38031	0.248643	5.03192	4.85591e-07	4.28355e-06	lncRNA:CR45726	0	0	0	0	0	0	0	0
FBgn0285879	227.48	1.24998	2.37838	0.220043	5.68061	1.34219e-08	1.53319e-07	disco-r	0	0	0	0	0	0	0	0
FBgn0035422	5760.34	1.24782	2.37483	0.21454	5.81626	6.01799e-09	7.26804e-08	RpL28	0	0	0	0	0	0	0	0
FBgn0265590	98.8036	1.24548	2.37097	0.306834	4.05913	4.92567e-05	0.000284345	lncRNA:CR44417	0	0	0	0	0	0	0	0
FBgn0053198	549.976	1.24325	2.36731	0.165259	7.52304	5.35188e-14	1.20941e-12	pen-2	0	0	0	0	0	0	0	0
FBgn0002563	81.5053	1.24041	2.36266	0.404502	3.06652	0.00216563	0.00798693	Lsp1beta	0	0	0	0	0	0	0	0
FBgn0045761	327.454	1.23885	2.36011	0.229303	5.40269	6.5649e-08	6.63926e-07	CHKov1	0	0	0	0	0	0	0	0
FBgn0266070	39.7576	1.23843	2.35942	0.407544	3.03877	0.00237545	0.00864682	lncRNA:CR44823	0	0	0	0	0	0	0	0
FBgn0030723	65.4308	1.23797	2.35867	0.449498	2.75412	0.00588499	0.0188852	dpr18	0	0	0	0	0	0	0	0
FBgn0052196	86.7315	1.23757	2.35801	0.344227	3.59522	0.000324123	0.00151622	CG32196	0	0	0	0	0	0	0	0
FBgn0040989	4408.69	1.23656	2.35635	0.178196	6.93932	3.93981e-12	7.16642e-11	CG5693	0	0	0	0	0	0	0	0
FBgn0051675	43.9427	1.23654	2.35632	0.370487	3.3376	0.000845048	0.00351673	CG31675	0	0	0	0	0	0	0	0
FBgn0033129	111.381	1.23578	2.35508	0.243702	5.07085	3.96035e-07	3.55552e-06	Tsp42Eh	0	0	0	0	0	0	0	0
FBgn0031801	155.988	1.2352	2.35415	0.369727	3.34086	0.000835208	0.00348117	CG9498	0	0	0	0	0	0	0	0
FBgn0000228	487.114	1.23392	2.35206	0.249896	4.93775	7.90274e-07	6.70213e-06	Bsg25D	0	0	0	0	0	0	0	0
FBgn0261987	49.4359	1.23349	2.35135	0.373641	3.30126	0.000962506	0.00395241	Pxt	0	0	0	0	0	0	0	0
FBgn0040336	63.3422	1.23154	2.34818	0.341307	3.60831	0.000308196	0.00144823	Seipin	0	0	0	0	0	1	0	0
FBgn0033770	562.515	1.22988	2.34548	0.176401	6.9721	3.12254e-12	5.74493e-11	wuc	0	0	0	0	0	0	0	0
FBgn0086365	850.592	1.22987	2.34546	0.154895	7.94002	2.02143e-15	5.49868e-14	Orct2	0	0	0	0	0	0	0	0
FBgn0029785	6057.09	1.22976	2.34528	0.217384	5.65709	1.53962e-08	1.75048e-07	RpL35	0	0	0	0	0	0	0	0
FBgn0266183	22.1694	1.22932	2.34456	0.491188	2.50275	0.0123234	0.0353176	lncRNA:CR44889	0	0	0	0	0	0	0	0
FBgn0028704	137.261	1.2264	2.33983	0.270981	4.52579	6.01706e-06	4.26321e-05	Nckx30C	0	0	0	0	0	0	0	0
FBgn0031260	6053.13	1.22529	2.33802	0.218746	5.60143	2.12592e-08	2.36471e-07	Spp	0	0	0	0	0	1	0	0
FBgn0034142	657.637	1.22444	2.33665	0.192082	6.3746	1.83442e-10	2.71304e-09	CG8306	0	0	0	0	0	0	0	0
FBgn0020376	3.80386	1.32202	2.50016	1.17924	1.12108	0.262254	0.404836	Sr-CIII	0	0	0	0	0	0	0	0
FBgn0027083	1050.82	1.22339	2.33494	0.138468	8.83518	9.994e-19	3.77773e-17	MetRS-m	1	0	0	0	0	0	0	0
FBgn0013763	784.06	1.22304	2.33437	0.164566	7.43187	1.0707e-13	2.33612e-12	Idgf6	0	0	0	0	0	0	0	0
FBgn0027095	3831.55	1.22301	2.33434	0.231029	5.29378	1.19816e-07	1.16323e-06	Manf	0	0	0	0	0	0	0	0
FBgn0034058	132.518	1.22192	2.33257	0.236859	5.15886	2.48457e-07	2.29574e-06	Pex11	0	0	0	0	0	0	0	0
FBgn0267337	216.008	1.2214	2.33174	0.251365	4.85909	1.17925e-06	9.61977e-06	rn	0	0	0	0	0	0	0	0
FBgn0083124	62.7892	1.22136	2.33166	0.365436	3.34219	0.000831208	0.00346905	Uhg4	0	0	0	0	0	0	0	0
FBgn0020429	14.4551	1.31837	2.49384	0.617423	2.13528	0.0327381	0.0787847	GluRIIB	0	0	0	0	0	0	0	0
FBgn0030102	79.3928	1.22135	2.33164	0.392991	3.10782	0.0018847	0.00709501	SmydA-9	0	0	0	0	0	0	0	0
FBgn0001150	5.59425	1.31673	2.49101	0.932166	1.41255	0.157789	0.275699	gt	0	0	0	0	0	0	0	0
FBgn0004143	3.10615	1.31449	2.48715	1.32166	0.99458	0.319941	0.469355	nullo	0	0	0	0	0	0	0	0
FBgn0038842	1657.63	1.21991	2.32932	0.222868	5.47367	4.40812e-08	4.61258e-07	hdly	0	0	0	0	0	0	0	0
FBgn0028408	75.4594	1.21989	2.32929	0.298769	4.08306	4.44461e-05	0.00025873	Drep2	0	0	1	1	1	0	0	0
FBgn0035753	6525.18	1.21944	2.32856	0.209625	5.81725	5.98227e-09	7.23691e-08	RpL18	0	0	0	0	0	0	0	0
FBgn0032449	911.157	1.21867	2.32732	0.140164	8.69459	3.48076e-18	1.23852e-16	CG17036	0	0	0	0	0	0	0	0
FBgn0001276	58.2203	1.2179	2.32607	0.361028	3.37341	0.000742432	0.00314088	ix	0	0	0	1	0	0	0	0
FBgn0266208	288.753	1.21734	2.32518	0.243139	5.00678	5.5349e-07	4.82043e-06	lncRNA:CR44903	0	0	0	0	0	0	0	0
FBgn0051321	80.9195	1.21293	2.31808	0.284051	4.27012	1.95367e-05	0.000122709	CG31321	0	0	0	0	0	0	0	0
FBgn0014469	617.175	1.30842	2.47669	0.582863	2.24481	0.0247805	0.0628058	Cyp4e2	0	0	0	0	0	0	0	0
FBgn0263453	60.0938	1.21253	2.31744	0.457306	2.65147	0.00801415	0.0246731	asRNA:CR43476	0	0	0	0	0	0	0	0
FBgn0053281	4726.68	1.21136	2.31556	0.154411	7.84507	4.3272e-15	1.12253e-13	CG33281	0	0	0	0	0	0	0	0
FBgn0036105	185.331	1.21099	2.31496	0.297489	4.07069	4.68734e-05	0.000271664	Blos4	0	0	0	0	0	0	0	0
FBgn0039562	18387.5	1.21071	2.31451	0.231877	5.22133	1.77646e-07	1.68094e-06	Gp93	0	0	0	0	0	1	0	0
FBgn0026390	4.3274	1.30105	2.46408	1.0403	1.25064	0.211065	0.344161	Or33c	0	0	0	0	0	0	0	0
FBgn0051781	289.114	1.21069	2.31448	0.226039	5.35609	8.50427e-08	8.47689e-07	lncRNA:CR31781	0	0	0	0	0	0	0	0
FBgn0052190	4747.73	1.19857	2.29511	0.210838	5.68476	1.30996e-08	1.49991e-07	NUCB1	0	0	0	0	0	0	0	0
FBgn0033958	25.3622	1.19658	2.29195	0.464513	2.57598	0.00999564	0.0296689	jef	0	0	0	0	0	0	0	0
FBgn0034639	267.712	1.1955	2.29024	0.207938	5.7493	8.96123e-09	1.05342e-07	CG15673	0	0	0	0	0	0	0	0
FBgn0036039	253.817	1.19047	2.28227	0.224465	5.3036	1.13544e-07	1.109e-06	Naa60	0	0	0	0	0	0	0	0
FBgn0265351	104.405	1.18768	2.27787	0.318293	3.73142	0.000190406	0.000950921	nac	0	0	0	0	0	0	0	0
FBgn0034396	242.863	1.18605	2.27528	0.188148	6.30379	2.90461e-10	4.1646e-09	CG15097	0	0	0	0	0	0	0	0
FBgn0004396	1056.54	1.18473	2.27321	0.24348	4.86581	1.1399e-06	9.34061e-06	CrebA	0	0	0	0	0	0	0	0
FBgn0034920	143.688	1.18463	2.27305	0.220497	5.37254	7.76363e-08	7.77592e-07	CG5597	0	0	0	0	0	0	0	0
FBgn0031886	789.029	1.18428	2.2725	0.170955	6.92742	4.28571e-12	7.74782e-11	Nuf2	0	0	0	0	0	0	0	0
FBgn0024947	1108.5	1.1838	2.27174	0.204638	5.78482	7.25894e-09	8.65896e-08	NTPase	0	0	0	0	0	0	0	0
FBgn0085732	27.2121	1.18327	2.27091	0.485217	2.43864	0.0147427	0.0409941	CR40190	0	0	0	0	0	0	0	0
FBgn0050090	1201.19	1.18227	2.26933	0.164778	7.17491	7.23524e-13	1.43649e-11	CG30090	0	0	0	0	0	0	0	0
FBgn0034432	1075.25	1.18138	2.26794	0.230021	5.13596	2.80709e-07	2.5709e-06	CG7461	1	0	0	0	0	0	0	0
FBgn0035589	854.099	1.18136	2.2679	0.138233	8.54611	1.27312e-17	4.31881e-16	CHMP2B	0	0	0	0	0	0	0	0
FBgn0030073	50.3818	1.17979	2.26543	0.379384	3.10974	0.00187253	0.00705617	CG10962	0	0	0	0	0	0	0	0
FBgn0032225	27.0195	1.17976	2.26539	0.473701	2.49052	0.0127558	0.0363854	CG5022	0	0	0	0	0	0	0	0
FBgn0034408	305.426	1.1777	2.26215	0.19433	6.06031	1.35863e-09	1.79096e-08	sano	0	0	0	0	0	0	0	0
FBgn0019940	21.3657	1.17761	2.26201	0.491713	2.3949	0.0166247	0.0452901	Rh6	0	0	0	0	0	0	0	0
FBgn0003028	54.0403	1.17643	2.26017	0.39768	2.95823	0.00309407	0.0108948	ovo	0	0	0	0	0	0	0	0
FBgn0264550	22.5363	1.17555	2.25879	0.472474	2.48808	0.0128436	0.0366207	lncRNA:CR43929	0	0	0	0	0	0	0	0
FBgn0025679	2.42202	1.28333	2.434	1.44469	0.888309	0.374375	0.526658	Klf15	0	0	0	0	0	0	0	0
FBgn0003285	29.1719	1.17515	2.25816	0.460914	2.5496	0.0107846	0.031592	rst	0	0	0	1	1	0	0	0
FBgn0052462	199.706	1.17449	2.25713	0.260874	4.50212	6.72788e-06	4.69596e-05	CG32462	0	0	0	0	0	0	0	0
FBgn0031189	229.299	1.17441	2.25701	0.210666	5.57474	2.47897e-08	2.711e-07	CG14618	0	0	0	0	0	0	0	0
FBgn0035934	126.585	1.17202	2.25327	0.235234	4.98236	6.28145e-07	5.42562e-06	TrpA1	0	0	0	0	0	1	0	0
FBgn0030985	136.083	1.17158	2.25258	0.254015	4.61223	3.98365e-06	2.93986e-05	Obp18a	0	0	0	0	0	0	0	0
FBgn0263590	67.398	1.16898	2.24852	0.309484	3.77718	0.000158616	0.000809464	asRNA:CR43615	0	0	0	0	0	0	0	0
FBgn0027343	439.354	1.16729	2.2459	0.231435	5.04372	4.56569e-07	4.03672e-06	fz3	0	0	0	0	0	0	0	0
FBgn0038214	3.0343	1.277	2.42335	1.24538	1.02539	0.305178	0.453375	CG9616	0	0	0	0	0	0	0	0
FBgn0032230	36.9267	1.16722	2.24578	0.373852	3.12213	0.00179547	0.00679618	lft	0	0	0	0	0	0	1	0
FBgn0265078	100.036	1.16711	2.24561	0.245046	4.76282	1.90904e-06	1.50256e-05	lncRNA:CR44189	0	0	0	0	0	0	0	0
FBgn0039359	6878.3	1.16683	2.24518	0.199866	5.83808	5.28044e-09	6.42527e-08	RpL27	0	0	0	0	0	0	0	0
FBgn0050055	101.978	1.16615	2.24413	0.29407	3.96557	7.32204e-05	0.000406398	lncRNA:CR30055	0	0	0	0	0	0	0	0
FBgn0034399	672.261	1.1649	2.24217	0.143248	8.13204	4.22112e-16	1.22127e-14	CG15083	0	0	0	0	0	0	0	0
FBgn0031866	265.909	1.16445	2.24147	0.238757	4.87712	1.07647e-06	8.86583e-06	Nlg2	0	0	0	0	0	0	0	0
FBgn0267120	664.55	1.16408	2.2409	0.208077	5.59447	2.21291e-08	2.44344e-07	lncRNA:CR45560	0	0	0	0	0	0	0	0
FBgn0004118	97.0611	1.16385	2.24055	0.254529	4.57258	4.81761e-06	3.49679e-05	nAChRbeta2	0	0	0	0	0	0	0	0
FBgn0038199	49.2814	1.16381	2.24048	0.47203	2.46553	0.0136809	0.0385326	CCHa1	0	0	0	0	0	0	0	0
FBgn0263260	2763.05	1.16298	2.2392	0.253019	4.59644	4.29775e-06	3.14614e-05	sel	0	0	0	0	0	0	0	0
FBgn0264308	95.9828	1.16225	2.23806	0.252084	4.61056	4.01578e-06	2.95757e-05	CG43778	0	0	0	0	0	0	0	0
FBgn0036040	69.8687	1.16191	2.23754	0.315257	3.68561	0.000228159	0.0011161	CG6749	0	0	0	0	0	0	0	0
FBgn0037715	515.911	1.16135	2.23667	0.18276	6.35451	2.09092e-10	3.06745e-09	CG9399	1	0	0	0	0	0	0	0
FBgn0003041	842.596	1.16099	2.2361	0.182092	6.37583	1.81975e-10	2.69408e-09	pbl	0	0	0	0	0	0	0	0
FBgn0263985	496.036	1.15788	2.2313	0.156343	7.40606	1.30112e-13	2.79692e-12	CR43734	0	0	0	0	0	0	0	0
FBgn0037000	344.748	1.15781	2.23119	0.212575	5.44661	5.13399e-08	5.29518e-07	ZnT77C	0	0	0	0	0	0	0	0
FBgn0025595	116.216	1.15707	2.23003	0.278116	4.16037	3.17726e-05	0.000190205	AkhR	0	0	0	0	0	1	0	0
FBgn0034219	349.011	1.15664	2.22937	0.170166	6.79712	1.06728e-11	1.82731e-10	mthl4	0	0	0	0	0	0	0	0
FBgn0036395	62.2478	1.15612	2.22858	0.312156	3.70366	0.000212508	0.00104622	CG17361	0	0	0	0	0	0	0	0
FBgn0039897	252.752	1.15286	2.22354	0.205531	5.60918	2.03285e-08	2.26871e-07	CG1674	0	0	0	0	0	0	0	0
FBgn0063491	383.402	1.15277	2.22341	0.217219	5.30696	1.11466e-07	1.09017e-06	GstE9	0	0	0	0	0	0	0	0
FBgn0014368	4.7359	1.24355	2.36781	1.06155	1.17145	0.241416	0.380354	nol	0	0	0	0	0	0	0	0
FBgn0000567	210.741	1.15156	2.22154	0.254151	4.53101	5.87037e-06	4.17554e-05	Eip74EF	0	0	0	1	1	0	1	0
FBgn0267933	29.0963	1.1515	2.22145	0.446427	2.57938	0.00989786	0.0294447	lncRNA:CR46213	0	0	0	0	0	0	0	0
FBgn0033304	271.698	1.15144	2.22135	0.198084	5.81288	6.14084e-09	7.40412e-08	Cyp6a13	0	0	0	0	0	0	0	0
FBgn0035917	525.138	1.15141	2.22131	0.234483	4.91044	9.08716e-07	7.63542e-06	Zasp66	0	0	0	0	0	0	0	0
FBgn0030292	284.769	1.1511	2.22083	0.248612	4.63011	3.6547e-06	2.72753e-05	CG11752	1	1	0	0	0	0	0	0
FBgn0029823	1489.27	1.14959	2.21851	0.21203	5.42183	5.89931e-08	5.99111e-07	Shmt	0	0	0	0	0	0	0	0
FBgn0264326	306.845	1.14778	2.21573	0.273348	4.19898	2.68116e-05	0.000163936	DNApol-epsilon255	0	0	0	0	0	1	0	0
FBgn0030136	6733.56	1.14717	2.21479	0.195312	5.87351	4.26651e-09	5.26637e-08	RpS28b	0	0	0	0	0	0	0	0
FBgn0052187	54.2836	1.14706	2.21461	0.373864	3.06811	0.00215418	0.00794672	CG32187	0	0	0	0	0	0	0	0
FBgn0019661	1536.51	1.14704	2.2146	0.225691	5.08235	3.72785e-07	3.36338e-06	lncRNA:roX1	0	0	0	0	0	0	0	0
FBgn0028532	2.35673	1.23436	2.35277	1.52253	0.81073	0.417521	0.568824	CG7968	0	0	0	0	0	0	0	0
FBgn0085399	111.146	1.14368	2.20944	0.317459	3.6026	0.000315045	0.00147755	CG34370	0	0	0	0	0	0	0	0
FBgn0050082	55.4481	1.14238	2.20744	0.318543	3.58625	0.000335461	0.00156173	CG30082	0	0	0	0	0	0	0	0
FBgn0011284	11246.9	1.14225	2.20725	0.210485	5.42676	5.73862e-08	5.85654e-07	RpS4	0	0	0	0	0	0	0	0
FBgn0015288	1751.36	1.14095	2.20526	0.20007	5.70276	1.17886e-08	1.36051e-07	RpL22	0	0	0	0	0	0	0	0
FBgn0031299	87.798	1.14029	2.20426	0.328834	3.46769	0.000524958	0.00231717	CG4629	0	0	0	0	0	1	0	0
FBgn0050022	273.3	1.13812	2.20094	0.180685	6.29893	2.99713e-10	4.29304e-09	CG30022	1	0	0	0	0	0	0	0
FBgn0004842	19.6969	1.22938	2.34466	0.546427	2.24985	0.0244587	0.0621524	RYa-R	0	0	0	0	0	0	0	0
FBgn0260659	497.734	1.13714	2.19945	0.20393	5.57615	2.45894e-08	2.69262e-07	CG42542	0	0	0	0	0	0	0	0
FBgn0051469	41.3714	1.13691	2.1991	0.391159	2.90652	0.00365473	0.0125501	CG31469	0	0	0	0	0	0	0	0
FBgn0036302	531.626	1.1351	2.19634	0.18727	6.06128	1.35042e-09	1.78175e-08	sowah	0	0	0	0	0	0	0	0
FBgn0014011	615.699	1.13502	2.19621	0.222413	5.10319	3.33968e-07	3.0263e-06	Rac2	0	0	0	0	0	1	0	0
FBgn0037045	308.092	1.13401	2.19468	0.169501	6.6903	2.22721e-11	3.65831e-10	CG10584	0	0	0	0	0	0	0	0
FBgn0050185	548.615	1.13028	2.18902	0.233103	4.84885	1.24179e-06	1.00903e-05	AIMP3	0	0	0	0	0	1	0	0
FBgn0023170	5548.18	1.12767	2.18505	0.202719	5.56272	2.656e-08	2.88239e-07	RpL39	0	0	0	0	0	0	0	0
FBgn0031412	185.073	1.12734	2.18456	0.441338	2.55438	0.0106378	0.0312435	CG16995	0	0	0	0	0	0	0	0
FBgn0030406	149.039	1.12728	2.18446	0.261076	4.31782	1.57577e-05	0.000101695	CG1463	0	0	0	0	0	0	0	0
FBgn0085638	560.72	1.12646	2.18323	0.195975	5.74798	9.03162e-09	1.05998e-07	CG41378	0	0	0	0	0	0	0	0
FBgn0051674	45.9023	1.1249	2.18087	0.356394	3.15635	0.00159755	0.00611818	CG31674	0	0	0	0	0	0	0	0
FBgn0028422	58.9334	1.12372	2.17908	0.345424	3.25316	0.00114129	0.00458564	GluRIID	0	0	0	0	0	0	0	0
FBgn0033906	3203.11	1.12338	2.17857	0.199509	5.63073	1.79448e-08	2.02129e-07	ReepB	0	0	0	0	0	0	0	0
FBgn0264845	62.7821	1.12239	2.17708	0.355895	3.15372	0.00161202	0.00617037	Tep5Psi	0	0	0	0	0	0	0	0
FBgn0028506	204.91	1.12146	2.17567	0.219776	5.10273	3.34795e-07	3.03191e-06	CG4455	0	0	0	0	0	0	0	0
FBgn0263582	98.3644	1.12123	2.17532	0.276962	4.04831	5.15898e-05	0.000296052	lncRNA:CR43607	0	0	0	0	0	0	0	0
FBgn0035401	832.043	1.11982	2.1732	0.2446	4.57819	4.69028e-06	3.41117e-05	Alg2	0	0	0	0	0	0	0	0
FBgn0032615	21.1509	1.21254	2.31745	0.542849	2.23366	0.0255053	0.0643158	CG6012	0	0	0	0	0	0	0	0
FBgn0003890	368.063	1.11956	2.17281	0.222882	5.02312	5.08387e-07	4.46234e-06	betaTub97EF	0	0	0	0	0	0	0	0
FBgn0284248	2128.66	1.11954	2.17278	0.223084	5.0185	5.20763e-07	4.56271e-06	Cyt-c-p	1	0	0	0	0	0	0	0
FBgn0000180	166.552	1.11623	2.1678	0.241224	4.62736	3.70349e-06	2.75828e-05	bib	0	0	0	0	0	0	0	0
FBgn0036690	80.8303	1.11447	2.16515	0.283631	3.92929	8.51974e-05	0.000466821	Ilp8	0	0	0	0	0	0	0	0
FBgn0037408	75.399	1.11433	2.16494	0.304578	3.65859	0.000253603	0.00122451	NPFR	0	0	0	0	0	0	0	0
FBgn0011822	1.76692	1.20278	2.30183	1.65618	0.726238	0.467693	0.614035	Pgcl	0	0	0	1	0	0	0	1
FBgn0035208	181.983	1.11423	2.16479	0.207311	5.37467	7.67233e-08	7.69506e-07	CG9184	0	0	0	0	0	0	0	0
FBgn0032799	1435.97	1.11235	2.16197	0.16555	6.71908	1.82881e-11	3.0382e-10	CG10166	0	0	0	0	0	0	0	0
FBgn0010620	771.521	1.11207	2.16156	0.229224	4.85145	1.22561e-06	9.96438e-06	CG10939	0	0	0	0	0	0	0	0
FBgn0023523	11.7812	1.19299	2.28627	0.689753	1.7296	0.0837024	0.166788	Or2a	0	0	0	0	0	0	0	0
FBgn0036298	250.256	1.11194	2.16136	0.210788	5.27516	1.32638e-07	1.27918e-06	nst	0	0	0	0	0	0	0	0
FBgn0039226	1953.36	1.11142	2.16059	0.16055	6.92261	4.43394e-12	7.99592e-11	Ude	0	0	0	0	0	0	0	0
FBgn0014863	1543.59	1.11086	2.15975	0.203292	5.46438	4.64533e-08	4.82882e-07	Mlp84B	0	0	0	0	0	0	0	0
FBgn0038038	681.29	1.11027	2.15886	0.200382	5.54075	3.01173e-08	3.23814e-07	Sccpdh2	1	0	0	0	0	0	0	0
FBgn0003118	88.9324	1.10899	2.15694	0.291928	3.79883	0.000145382	0.000748938	pnt	0	0	1	1	1	0	0	0
FBgn0053147	715.908	1.10884	2.15672	0.162419	6.82702	8.66991e-12	1.50745e-10	Hs3st-A	0	0	0	0	0	0	0	0
FBgn0085474	41.845	1.10807	2.15557	0.418203	2.6496	0.00805875	0.02478	CG34445	0	0	0	0	0	0	0	0
FBgn0001253	13.8594	1.1833	2.27096	0.683654	1.73085	0.0834792	0.166375	ImpE1	0	0	0	0	0	0	0	0
FBgn0032205	646.008	1.1076	2.15487	0.165442	6.69481	2.15948e-11	3.5591e-10	CG4957	1	0	0	0	0	0	0	0
FBgn0053773	514.457	1.10566	2.15197	0.161934	6.82783	8.62107e-12	1.50075e-10	CG33773	0	0	0	0	0	0	0	0
FBgn0052368	102.956	1.10556	2.15183	0.30181	3.66311	0.000249172	0.00120512	CG32368	0	0	0	0	0	0	0	0
FBgn0262116	918.934	1.10546	2.15167	0.221886	4.98209	6.29015e-07	5.42945e-06	RNASEK	0	0	0	0	0	0	0	0
FBgn0026190	50.0737	1.10379	2.14919	0.346895	3.18192	0.00146304	0.00567927	PH4alphaMP	0	0	0	0	0	0	0	0
FBgn0033802	37.5772	1.10311	2.14818	0.389086	2.83515	0.00458047	0.0152094	CG17724	0	0	0	0	0	0	0	0
FBgn0020765	2.94103	1.17958	2.26511	1.24537	0.947172	0.343551	0.494383	Acp65Aa	0	0	0	0	0	0	0	0
FBgn0064225	11053.7	1.10102	2.14507	0.193985	5.6758	1.38044e-08	1.57319e-07	RpL5	0	0	0	0	0	0	0	0
FBgn0250819	244.633	1.10048	2.14426	0.221207	4.97489	6.52858e-07	5.62192e-06	CG33521	0	0	0	0	0	0	0	0
FBgn0083123	115.268	1.10011	2.14371	0.244704	4.49567	6.93515e-06	4.83137e-05	Uhg5	0	0	0	0	0	0	0	0
FBgn0086710	4612.42	1.09858	2.14144	0.211236	5.20071	1.98529e-07	1.8604e-06	RpL30	0	0	0	0	0	0	0	0
FBgn0031971	1740.15	1.09672	2.13868	0.201636	5.43912	5.35452e-08	5.50115e-07	Sirup	1	0	0	0	0	1	0	0
FBgn0025334	13.3211	1.1745	2.25715	0.636878	1.84415	0.0651609	0.136366	PHDP	0	0	0	0	0	0	0	0
FBgn0031417	156.936	1.09661	2.13852	0.448453	2.44532	0.0144722	0.0403786	CG3597	0	0	0	0	0	0	0	0
FBgn0001296	277.86	1.09637	2.13816	0.185871	5.89855	3.66709e-09	4.56519e-08	kar	0	0	0	0	0	0	0	0
FBgn0263233	46.4536	1.09514	2.13634	0.358342	3.05613	0.00224218	0.00821925	robls54B	0	0	0	0	0	0	0	0
FBgn0267932	78.2877	1.09365	2.13413	0.300362	3.64111	0.000271461	0.00130039	lncRNA:CR46212	0	0	0	0	0	0	0	0
FBgn0030794	240.066	1.09346	2.13386	0.189463	5.77138	7.86259e-09	9.32554e-08	CG13005	0	0	0	0	0	0	0	0
FBgn0265382	107.08	1.0928	2.13287	0.293344	3.72532	0.000195071	0.000972386	lncRNA:CR44323	0	0	0	0	0	0	0	0
FBgn0039697	812.364	1.09261	2.13259	0.215792	5.06323	4.12212e-07	3.67806e-06	CG7834	1	0	0	0	0	0	0	0
FBgn0015919	44.9065	1.09065	2.12969	0.389983	2.79665	0.00516353	0.0169093	caup	0	0	0	0	0	0	0	0
FBgn0287618	58.4053	1.09062	2.12965	0.403628	2.70203	0.00689173	0.0216609	asRNA:CR46487	0	0	0	0	0	0	0	0
FBgn0040850	657.287	1.09	2.12873	0.195349	5.57974	2.40872e-08	2.6416e-07	CG15210	0	0	0	0	0	0	0	0
FBgn0264979	162.365	1.08889	2.1271	0.379236	2.87127	0.00408822	0.0138459	CG4267	0	0	0	0	0	0	0	0
FBgn0266591	32.7145	1.08825	2.12616	0.460146	2.36502	0.0180291	0.048436	CG45116	0	0	0	0	0	0	0	0
FBgn0020257	143.409	1.08796	2.12573	0.329719	3.29964	0.000968072	0.00396855	Ppa	0	0	0	0	0	0	0	0
FBgn0051184	291.076	1.08753	2.1251	0.206614	5.26357	1.41283e-07	1.35537e-06	LSm3	0	0	0	0	0	0	0	0
FBgn0035103	57.5136	1.08708	2.12444	0.390142	2.78637	0.00533023	0.0173692	Vdup1	0	0	0	0	0	1	0	0
FBgn0036147	642.197	1.087	2.12431	0.170287	6.3833	1.73313e-10	2.57108e-09	Plod	0	0	0	0	0	0	0	0
FBgn0283434	396.382	1.08688	2.12415	0.250171	4.34457	1.39551e-05	9.10711e-05	SdicC	0	0	0	0	0	0	0	0
FBgn0025390	205.224	1.08583	2.1226	0.246134	4.41156	1.02628e-05	6.8954e-05	Mur2B	0	0	0	0	0	0	0	0
FBgn0035964	170.48	1.08543	2.12201	0.217498	4.99055	6.02078e-07	5.2124e-06	Dhpr	0	0	0	0	0	0	0	0
FBgn0033307	91.3872	1.08067	2.11502	0.423147	2.55388	0.0106529	0.0312817	CG14752	0	0	0	0	0	0	0	0
FBgn0030244	319.424	1.08061	2.11494	0.202192	5.3445	9.06672e-08	9.00669e-07	CG2157	0	0	0	0	0	0	0	0
FBgn0029935	200.593	1.07951	2.11332	0.27058	3.98961	6.61807e-05	0.000370862	CG4615	0	0	0	0	0	0	0	0
FBgn0069969	29.2569	1.07945	2.11323	0.435174	2.4805	0.0131197	0.0372482	CG40498	0	0	0	0	0	0	0	0
FBgn0004777	12.6954	1.15673	2.22951	0.650899	1.77712	0.0755485	0.153641	Ccp84Ag	0	0	0	0	0	0	0	0
FBgn0039155	131.57	1.07846	2.11178	0.25016	4.31108	1.62459e-05	0.000104291	Kal1	0	0	0	0	0	0	0	0
FBgn0036661	1854.87	1.07832	2.11158	0.169667	6.35554	2.07701e-10	3.05012e-09	CG9705	0	0	0	0	0	0	0	0
FBgn0028833	931.715	1.07826	2.11149	0.20506	5.25826	1.45428e-07	1.39329e-06	Dak1	0	0	0	0	0	0	0	0
FBgn0011589	76.6042	1.07634	2.10869	0.282916	3.80447	0.00014211	0.000734419	Elk	0	0	0	0	0	0	0	0
FBgn0037270	1847.97	1.07623	2.10852	0.207228	5.19344	2.0644e-07	1.92832e-06	eIF3f1	0	0	0	0	0	0	0	0
FBgn0063497	2725.29	1.07616	2.10841	0.253297	4.2486	2.15112e-05	0.000134127	GstE3	0	0	0	0	0	0	0	0
FBgn0034887	70.8422	1.0748	2.10643	0.319092	3.3683	0.000756322	0.00319254	St1	0	0	0	0	0	0	0	0
FBgn0038404	174.638	1.0737	2.10483	0.216003	4.97078	6.66839e-07	5.72875e-06	CG8925	0	0	0	0	0	0	0	0
FBgn0040091	272.393	1.0736	2.10468	0.199758	5.37451	7.67909e-08	7.69654e-07	Ugt317A1	0	0	0	0	0	0	0	0
FBgn0039437	35.8025	1.07323	2.10413	0.404593	2.65261	0.00798728	0.0245956	TwdlL	0	0	0	0	0	0	0	0
FBgn0029879	14.7724	1.14854	2.21689	0.585484	1.96169	0.0497988	0.10979	APC7	0	0	0	0	0	0	0	0
FBgn0266549	54.3654	1.07294	2.10371	0.367864	2.91666	0.00353798	0.0122184	lncRNA:CR45102	0	0	0	0	0	0	0	0
FBgn0026562	1598.32	1.07173	2.10196	0.227204	4.71706	2.39275e-06	1.8532e-05	SPARC	0	0	0	0	0	0	0	0
FBgn0003149	2369.76	1.07161	2.10177	0.201437	5.31982	1.03871e-07	1.02069e-06	Prm	0	0	0	0	0	0	0	0
FBgn0032140	530.92	1.07073	2.10049	0.239264	4.47508	7.6383e-06	5.27325e-05	CG13117	0	0	0	0	0	0	0	0
FBgn0004783	2.30984	1.14376	2.20956	1.41738	0.806953	0.419694	0.570769	Ccp84Aa	0	0	0	0	0	0	0	0
FBgn0031275	1050.37	1.07036	2.09996	0.181617	5.89351	3.78082e-09	4.69874e-08	GABA-B-R3	0	0	0	0	0	0	0	0
FBgn0034861	268.365	1.0675	2.0958	0.23002	4.64088	3.46925e-06	2.60247e-05	CG9815	0	0	0	0	0	0	0	0
FBgn0039290	108.437	1.06626	2.094	0.245473	4.3437	1.40103e-05	9.13902e-05	CG13654	0	0	0	0	0	0	0	0
FBgn0266084	402.941	1.06561	2.09306	0.250807	4.24874	2.14974e-05	0.000134098	Fhos	0	0	0	1	1	0	0	0
FBgn0033134	269.477	1.06534	2.09266	0.205639	5.18061	2.21157e-07	2.05392e-06	Tsp42El	0	0	0	0	0	0	0	0
FBgn0283450	299.956	1.06401	2.09074	0.251016	4.23883	2.24689e-05	0.000139382	Glo1	0	0	0	0	0	0	0	0
FBgn0038063	230.981	1.06398	2.09069	0.194577	5.46815	4.54769e-08	4.74198e-07	Octbeta2R	0	0	0	0	0	0	0	0
FBgn0035082	133.488	1.06254	2.08861	0.269468	3.9431	8.04339e-05	0.000443056	CG2811	0	0	0	0	0	0	0	0
FBgn0004888	1909.44	1.06178	2.08751	0.19572	5.425	5.7953e-08	5.9061e-07	Scsalpha1	1	0	0	0	0	0	0	0
FBgn0040653	5238.09	1.06132	2.08683	0.141556	7.49748	6.50559e-14	1.45431e-12	IM4	0	0	0	0	0	0	0	0
FBgn0032202	174.792	1.06066	2.08589	0.278404	3.80979	0.000139083	0.000721079	REPTOR-BP	0	0	0	0	0	0	0	0
FBgn0025686	14.8013	1.13096	2.19004	0.59302	1.90711	0.0565061	0.121342	Amnionless	0	0	0	0	0	0	0	0
FBgn0030519	922.87	1.06003	2.08497	0.211607	5.00943	5.45926e-07	4.76385e-06	CG11151	0	0	0	0	0	0	0	0
FBgn0053557	171.431	1.05984	2.08469	0.211843	5.00294	5.64634e-07	4.90867e-06	CG33557	0	0	0	0	0	0	0	0
FBgn0010452	160.157	1.05857	2.08287	0.228453	4.63365	3.59267e-06	2.68675e-05	trn	0	0	0	0	0	0	0	0
FBgn0264539	235.629	1.05813	2.08222	0.207627	5.09629	3.46382e-07	3.13294e-06	lncRNA:CR43918	0	0	0	0	0	0	0	0
FBgn0263389	476.367	1.05486	2.07752	0.203063	5.19476	2.04982e-07	1.91593e-06	CR43441	0	0	0	0	0	0	0	0
FBgn0002593	11446.3	1.0542	2.07657	0.188287	5.59893	2.15685e-08	2.39425e-07	RpLP1	0	0	0	0	0	0	0	0
FBgn0035600	1070.46	1.05418	2.07654	0.197592	5.33515	9.54644e-08	9.44456e-07	Cyt-c1	1	1	0	0	0	0	0	0
FBgn0050195	46.3605	1.05233	2.07387	0.377997	2.78396	0.00537003	0.0174676	CG30195	0	0	0	0	0	0	0	0
FBgn0020618	11760.1	1.05086	2.07177	0.184725	5.68881	1.27931e-08	1.46713e-07	Rack1	0	0	0	0	0	1	1	0
FBgn0043532	633.098	1.0503	2.07096	0.253631	4.14105	3.45719e-05	0.000204689	Obp56i	0	0	0	0	0	0	0	0
FBgn0040793	904.257	1.05009	2.07067	0.214643	4.89229	9.96693e-07	8.27904e-06	CG7630	0	0	0	0	0	0	0	0
FBgn0040773	1019.22	1.04987	2.07034	0.214735	4.88914	1.01278e-06	8.3744e-06	COX7C	1	1	0	0	0	0	0	0
FBgn0266782	67.7409	1.04945	2.06974	0.322484	3.25428	0.00113682	0.00457043	lncRNA:CR45247	0	0	0	0	0	0	0	0
FBgn0260745	22331.5	1.04815	2.06787	0.226448	4.62864	3.68074e-06	2.74275e-05	mfas	0	0	0	0	0	0	0	0
FBgn0029723	45.8121	1.04757	2.06705	0.341662	3.0661	0.00216871	0.00799625	Proc-R	0	0	0	0	0	0	0	0
FBgn0266074	125.446	1.04624	2.06514	0.240272	4.35439	1.33438e-05	8.75921e-05	lncRNA:CR44827	0	0	0	0	0	0	0	0
FBgn0266221	55.9518	1.04561	2.06425	0.41984	2.49051	0.012756	0.0363854	lncRNA:CR44916	0	0	0	0	0	0	0	0
FBgn0267150	89.2155	1.04529	2.06378	0.312894	3.34073	0.000835599	0.00348138	lncRNA:CR45590	0	0	0	0	0	0	0	0
FBgn0027287	3474.36	1.04454	2.06271	0.19185	5.44458	5.19271e-08	5.34061e-07	Gmap	0	0	0	0	0	0	0	0
FBgn0033209	1937.11	1.04396	2.06188	0.135267	7.7178	1.18355e-14	2.88512e-13	CG12107	0	0	0	0	0	0	0	0
FBgn0052207	1128.93	1.04378	2.06162	0.197036	5.29739	1.1747e-07	1.1435e-06	hpRNA:CR32207	0	0	0	0	0	0	0	0
FBgn0036787	1554.78	1.04364	2.06142	0.169434	6.15953	7.29617e-10	9.88651e-09	CG4306	0	0	0	0	0	0	0	0
FBgn0034194	677.58	1.04253	2.05983	0.200368	5.20304	1.9605e-07	1.83953e-06	CG15611	0	0	0	0	0	1	0	0
FBgn0260386	166.502	1.04221	2.05938	0.267014	3.90321	9.4925e-05	0.000512785	mtg	0	0	0	0	0	0	0	0
FBgn0040754	192.587	1.04207	2.05918	0.257723	4.04337	5.26888e-05	0.000301763	CG17059	0	0	0	0	0	0	0	0
FBgn0032782	535.738	1.04176	2.05874	0.173015	6.02123	1.73099e-09	2.23326e-08	Rab9	0	0	0	0	0	0	0	1
FBgn0053774	228.596	1.04119	2.05792	0.24758	4.20547	2.60542e-05	0.000159851	CG33774	0	0	0	0	0	0	0	0
FBgn0261592	9566.27	1.03716	2.05219	0.191271	5.42247	5.87824e-08	5.97389e-07	RpS6	0	0	0	0	0	0	0	0
FBgn0024733	10256.5	1.03604	2.05059	0.196495	5.27261	1.345e-07	1.29457e-06	RpL10	0	0	0	0	0	0	0	0
FBgn0033691	45.7414	1.03583	2.0503	0.372573	2.78022	0.00543227	0.0176425	CG8860	0	0	0	0	0	0	0	0
FBgn0286213	6318.1	1.03471	2.0487	0.182765	5.66141	1.50134e-08	1.70829e-07	RpS12	0	0	0	0	0	0	0	0
FBgn0011476	9.5177	1.10363	2.14895	0.777487	1.41948	0.155758	0.272872	l(3)neo43	1	0	0	0	0	0	0	0
FBgn0040309	3231.04	1.03343	2.04688	0.173394	5.96	2.52241e-09	3.19483e-08	Jafrac1	0	0	0	0	0	1	0	0
FBgn0063649	322.847	1.03303	2.04632	0.29245	3.53234	0.000411899	0.00186508	CG6006	0	0	0	0	0	0	0	0
FBgn0004580	81.623	1.0328	2.046	0.280074	3.6876	0.000226379	0.00110851	Cbp53E	0	0	0	0	0	0	0	0
FBgn0037440	617.31	1.03223	2.04518	0.228332	4.52073	6.16254e-06	4.34513e-05	CRAT	0	0	0	0	0	0	0	0
FBgn0036489	402.449	1.03208	2.04498	0.232174	4.44529	8.77722e-06	5.9857e-05	CG7011	0	0	0	0	0	0	0	0
FBgn0032987	7979.53	1.03085	2.04323	0.185152	5.56762	2.58245e-08	2.81516e-07	RpL21	0	0	0	0	0	0	0	0
FBgn0260869	78.0196	1.03058	2.04284	0.384407	2.68095	0.00734143	0.0228193	CG42579	0	0	0	0	0	0	0	0
FBgn0036207	866.652	1.02998	2.042	0.238568	4.31734	1.57922e-05	0.000101843	CG10907	0	0	0	0	0	0	0	0
FBgn0038828	23.2272	1.09567	2.13713	0.526991	2.07911	0.037607	0.0882334	CG17270	0	0	0	0	0	0	0	0
FBgn0005775	35.0777	1.02955	2.04138	0.411168	2.50396	0.0122811	0.035224	Con	0	0	0	0	0	0	0	0
FBgn0261565	740.224	1.02787	2.03902	0.188183	5.4621	4.70546e-08	4.88087e-07	Lmpt	0	0	0	0	0	0	0	0
FBgn0030617	146.285	1.02775	2.03885	0.227066	4.52622	6.00474e-06	4.25863e-05	CG9095	0	0	0	0	0	0	0	0
FBgn0263773	619.36	1.02761	2.03864	0.238252	4.31312	1.60963e-05	0.000103467	fok	0	0	0	0	0	0	0	0
FBgn0035248	82.0364	1.02743	2.03839	0.272166	3.77502	0.000159992	0.000815823	CG13919	0	0	0	0	0	0	0	0
FBgn0010078	7319.49	1.02736	2.0383	0.211651	4.85405	1.20964e-06	9.85108e-06	RpL23	0	0	0	0	0	0	0	0
FBgn0003360	7022.4	1.02734	2.03826	0.178568	5.75322	8.75606e-09	1.03013e-07	sesB	1	0	0	0	0	1	1	0
FBgn0013323	303.357	1.02726	2.03815	0.17146	5.99123	2.08257e-09	2.65855e-08	Ptth	0	0	0	0	0	0	0	0
FBgn0265690	141.663	1.02216	2.03095	0.238745	4.28137	1.85743e-05	0.000117272	lncRNA:CR44497	0	0	0	0	0	0	0	0
FBgn0027074	361.991	1.02168	2.03028	0.215293	4.74552	2.07976e-06	1.62724e-05	Ugt36F1	0	0	0	0	0	0	0	0
FBgn0014869	1078.28	1.02148	2.03001	0.186808	5.4681	4.54876e-08	4.74198e-07	Pglym78	0	0	0	0	0	0	0	0
FBgn0084001	101.915	1.02013	2.0281	0.24358	4.18807	2.81341e-05	0.00017124	CG41434	0	0	0	0	0	0	0	0
FBgn0036999	414.832	1.01925	2.02686	0.245854	4.14574	3.38711e-05	0.000201112	isoQC	1	0	0	0	0	0	0	0
FBgn0038302	80.9842	1.01913	2.0267	0.308822	3.30007	0.000966615	0.00396705	CG4210	0	0	0	0	0	0	0	0
FBgn0040361	132.315	1.0181	2.02525	0.248277	4.10066	4.11968e-05	0.000241651	CG14627	0	0	0	0	0	0	0	0
FBgn0021767	17.3077	1.08583	2.1226	0.58809	1.84637	0.0648379	0.135826	org-1	0	0	0	0	0	0	0	0
FBgn0034968	8072.01	1.01618	2.02255	0.19339	5.25457	1.48374e-07	1.41965e-06	RpL12	0	0	0	0	0	0	0	0
FBgn0031603	324.342	1.016	2.0223	0.188416	5.39232	6.95552e-08	7.01967e-07	CG15432	0	0	0	0	0	0	0	0
FBgn0003482	27.5296	1.085	2.12138	0.502498	2.15922	0.0308332	0.075011	spn-D	0	0	0	0	0	1	0	0
FBgn0031661	575.863	1.01597	2.02226	0.213845	4.75096	2.02457e-06	1.58919e-05	Gmd	0	0	0	0	0	0	0	0
FBgn0000711	734.187	1.01478	2.0206	0.197076	5.1492	2.616e-07	2.40801e-06	flw	0	0	0	0	0	1	0	0
FBgn0037686	4393.79	1.01438	2.02004	0.209085	4.85153	1.22511e-06	9.96438e-06	RpL34b	0	0	0	0	0	0	0	0
FBgn0024189	84.0054	1.01394	2.01942	0.271779	3.73075	0.000190912	0.000953122	sns	0	0	0	0	0	0	0	0
FBgn0033926	5008.12	1.01375	2.01915	0.147498	6.87296	6.28815e-12	1.11193e-10	Arc1	0	0	0	0	0	0	0	0
FBgn0031908	727.227	1.01362	2.01897	0.21797	4.65029	3.31475e-06	2.49558e-05	CG5177	0	0	0	0	0	0	0	0
FBgn0038073	300.861	1.01316	2.01833	0.216808	4.67307	2.96738e-06	2.2527e-05	CG14395	0	0	0	0	0	0	0	0
FBgn0016715	172.384	1.0131	2.01824	0.281943	3.59326	0.000326568	0.00152472	Reg-2	0	0	0	0	0	0	0	0
FBgn0032822	300.482	1.01301	2.01811	0.182394	5.55394	2.79304e-08	3.01536e-07	CG10466	0	0	0	0	0	0	0	0
FBgn0038294	1018.22	1.01289	2.01795	0.227063	4.46083	8.16424e-06	5.60709e-05	Mf	0	0	0	0	0	0	0	0
FBgn0000153	80.1756	1.01128	2.01569	0.327505	3.08782	0.00201632	0.0075259	b	0	0	0	0	0	0	0	0
FBgn0033320	272.153	1.01104	2.01536	0.287197	3.52035	0.000430974	0.00193759	CG8586	0	0	0	0	0	0	0	0
FBgn0259994	81.5533	1.01084	2.01508	0.307272	3.28971	0.00100291	0.00409407	OtopLa	0	0	0	0	0	0	0	0
FBgn0026749	194.871	1.01074	2.01494	0.217897	4.63861	3.50763e-06	2.62585e-05	Yippee	0	0	0	0	0	0	0	0
FBgn0038840	171.138	1.00952	2.01324	0.231055	4.36917	1.24722e-05	8.23538e-05	Grik	0	0	0	0	0	0	0	0
FBgn0002579	6922.46	1.00707	2.00982	0.190956	5.27382	1.33614e-07	1.28773e-06	RpL36	0	0	0	0	0	0	0	0
FBgn0000038	331.731	1.00653	2.00908	0.208552	4.8263	1.39093e-06	1.12021e-05	nAChRbeta1	0	0	0	0	0	0	0	0
FBgn0029894	85.814	1.00626	2.00869	0.344268	2.92289	0.00346805	0.012022	CG14440	0	0	0	0	0	0	0	0
FBgn0030251	117.962	1.00552	2.00767	0.309387	3.25004	0.00115389	0.00462988	CG2145	0	0	0	0	0	0	0	0
FBgn0003429	144.04	1.00537	2.00746	0.227599	4.41729	9.99442e-06	6.73063e-05	slo	0	0	0	0	0	0	0	0
FBgn0031523	32.4481	1.06675	2.09472	0.627743	1.69935	0.0892537	0.175364	CG15408	0	0	0	0	0	0	0	0
FBgn0037525	450.868	1.00529	2.00735	0.212366	4.73377	2.20386e-06	1.71421e-05	CG17816	0	0	0	0	0	0	0	0
FBgn0285963	662.476	1.00503	2.00698	0.225191	4.46301	8.08175e-06	5.55568e-05	CG46339	0	0	0	0	0	0	0	0
FBgn0267330	5184.87	1.00328	2.00456	0.205205	4.88918	1.01256e-06	8.3744e-06	KdelR	0	0	0	0	0	0	0	0
FBgn0287213	106.411	1.00188	2.00261	0.295279	3.39299	0.000691332	0.0029487	CG46443	0	0	0	0	0	0	0	0
FBgn0037108	1011.61	1.00025	2.00035	0.202491	4.93974	7.82268e-07	6.6381e-06	Alg11	0	0	0	0	0	0	0	0
FBgn0002567	3718.09	0.999518	1.99933	0.165915	6.02429	1.69851e-09	2.1972e-08	Rab32	1	0	0	1	0	0	1	1
FBgn0287461	31.1155	0.998674	1.99816	0.411608	2.42627	0.0152548	0.0422059	lncRNA:CR46450	0	0	0	0	0	0	0	0
FBgn0036364	54.7948	0.997513	1.99656	0.323031	3.08798	0.0020152	0.00752365	CG14109	0	0	0	0	0	0	0	0
FBgn0003515	19.568	1.06121	2.08667	0.777524	1.36485	0.172299	0.295066	st	0	0	0	0	0	0	0	0
FBgn0261596	7269.03	0.996678	1.9954	0.213142	4.67613	2.92339e-06	2.22279e-05	RpS24	0	0	0	0	0	0	0	0
FBgn0034002	330.103	0.996085	1.99458	0.179272	5.55629	2.75574e-08	2.97952e-07	CG8079	0	0	0	0	0	0	0	0
FBgn0016694	1135.3	0.995775	1.99415	0.217496	4.57835	4.68661e-06	3.41117e-05	Pdp1	0	0	0	0	0	0	0	0
FBgn0261804	68.5165	0.994562	1.99248	0.306247	3.24758	0.00116391	0.00466107	CG42750	0	0	0	0	0	0	0	0
FBgn0038197	233.76	0.99366	1.99123	0.263791	3.76684	0.000165324	0.000840069	foxo	0	0	0	0	0	1	1	0
FBgn0267336	158.226	0.993455	1.99095	0.231671	4.28822	1.80112e-05	0.000114013	Glut4EF	0	0	0	0	0	0	0	0
FBgn0017545	12581.5	0.993403	1.99088	0.184401	5.38719	7.15667e-08	7.2027e-07	RpS3A	0	0	0	0	0	0	0	0
FBgn0034564	513.351	0.992401	1.98949	0.161431	6.14752	7.87042e-10	1.05956e-08	CG9344	0	0	0	0	0	0	0	0
FBgn0045866	4700.97	0.991718	1.98855	0.20958	4.73193	2.224e-06	1.72895e-05	bai	0	0	0	0	0	0	0	0
FBgn0287204	332.986	0.99099	1.98755	0.228977	4.3279	1.50541e-05	9.74999e-05	Cog8	0	0	0	0	0	0	0	0
FBgn0030801	72.589	0.99088	1.9874	0.298271	3.32208	0.000893492	0.00370139	Rcp	0	0	0	0	0	0	0	0
FBgn0259209	903.796	0.98912	1.98497	0.164758	6.00348	1.93131e-09	2.47852e-08	Mlp60A	0	0	0	0	0	0	0	0
FBgn0266390	1094.41	0.98754	1.9828	0.147064	6.71505	1.88e-11	3.11969e-10	lncRNA:CR45030	0	0	0	0	0	0	0	0
FBgn0040260	310.554	0.98652	1.9814	0.203558	4.84639	1.25729e-06	1.01935e-05	Ugt37D1	0	0	0	0	0	0	0	0
FBgn0003941	7142.6	0.986488	1.98136	0.197997	4.98234	6.28198e-07	5.42562e-06	RpL40	0	0	0	0	0	0	0	0
FBgn0004430	7.06071	1.04763	2.06712	0.915377	1.14447	0.252427	0.393574	LysS	0	0	0	0	0	0	0	0
FBgn0264672	352.373	0.98617	1.98092	0.175831	5.60863	2.03931e-08	2.27418e-07	Eogt	0	0	0	0	0	0	0	0
FBgn0004795	559.02	0.985865	1.9805	0.223561	4.40983	1.03451e-05	6.9443e-05	retn	0	0	0	0	0	0	0	0
FBgn0033566	416.35	0.985693	1.98026	0.173115	5.69387	1.24194e-08	1.42877e-07	CG18004	0	0	0	0	0	0	0	0
FBgn0035996	195.181	0.985298	1.97972	0.196598	5.01174	5.39389e-07	4.71455e-06	CG3448	0	0	0	0	0	1	0	0
FBgn0028424	16.795	1.04508	2.06348	0.608409	1.71772	0.0858472	0.170195	JhI-26	0	0	0	0	0	0	0	0
FBgn0002939	48.8041	1.04489	2.06321	1.19664	0.873188	0.38256	0.534916	ninaD	0	0	0	0	0	0	0	0
FBgn0020493	433.276	0.98526	1.97967	0.194353	5.06944	3.98978e-07	3.57692e-06	Dad	0	0	0	0	0	0	0	0
FBgn0004867	13268.6	0.984621	1.97879	0.159627	6.16827	6.90423e-10	9.40799e-09	RpS2	0	0	0	0	0	0	0	0
FBgn0035043	54.1725	0.984299	1.97835	0.396813	2.48051	0.0131195	0.0372482	CG4781	0	0	0	0	0	0	0	0
FBgn0003141	518.042	0.984184	1.97819	0.225835	4.35798	1.31265e-05	8.64392e-05	pr	1	0	0	0	0	0	0	0
FBgn0014930	418.701	0.981323	1.97428	0.221269	4.43498	9.20829e-06	6.25622e-05	CG2846	1	0	0	0	0	0	0	0
FBgn0032681	209.335	0.980674	1.97339	0.213617	4.5908	4.41542e-06	3.22902e-05	CG10283	0	0	0	0	0	0	0	0
FBgn0034628	232.916	0.980547	1.97321	0.341612	2.87035	0.0041002	0.01388	Acox57D-p	0	0	0	0	0	0	0	0
FBgn0032020	418.465	0.980321	1.9729	0.17188	5.70351	1.17367e-08	1.35559e-07	strat	0	0	0	0	0	0	0	0
FBgn0050502	60.7793	0.979987	1.97245	0.327058	2.99637	0.00273212	0.00978677	fa2h	0	0	0	0	0	0	0	0
FBgn0038975	85.7101	0.978495	1.97041	0.331335	2.95319	0.0031451	0.0110557	Nrx-1	0	0	0	0	0	0	0	0
FBgn0036551	225.807	0.97809	1.96986	0.311468	3.14026	0.00168799	0.00643576	CG17029	0	0	0	0	0	0	0	0
FBgn0043792	33.2525	0.976154	1.96721	0.396539	2.46168	0.0138288	0.0388964	CG30427	0	0	0	0	0	0	0	0
FBgn0031002	148.289	0.974718	1.96526	0.235013	4.14751	3.36118e-05	0.000199817	CG14196	0	0	0	0	0	0	0	0
FBgn0037519	357.666	0.974577	1.96506	0.201009	4.84843	1.24444e-06	1.01062e-05	CG3014	0	0	0	0	0	0	0	0
FBgn0039886	385.966	0.973244	1.96325	0.191837	5.07329	3.90994e-07	3.51243e-06	CG2003	0	0	0	0	0	0	0	0
FBgn0033928	100.713	0.972925	1.96282	0.28091	3.46348	0.000533239	0.00234803	Arc2	0	0	0	0	0	0	0	0
FBgn0031547	65.4861	0.972772	1.96261	0.315937	3.07901	0.00207692	0.00770861	Sr-CIV	0	0	0	0	0	0	0	0
FBgn0034578	300.787	0.971921	1.96145	0.175778	5.52925	3.21597e-08	3.43375e-07	CG15653	1	0	0	0	0	0	0	0
FBgn0030724	519.727	0.970892	1.96005	0.197884	4.90636	9.27832e-07	7.78705e-06	Nipsnap	1	0	0	0	0	0	0	0
FBgn0037845	168.253	0.970474	1.95948	0.214853	4.51693	6.27432e-06	4.41325e-05	CG14694	0	0	0	0	0	0	0	0
FBgn0024983	754.278	0.967662	1.95567	0.207997	4.65229	3.28277e-06	2.47406e-05	CG4293	0	0	0	0	0	0	0	0
FBgn0037215	802.331	0.96554	1.95279	0.158082	6.10783	1.00996e-09	1.35215e-08	beta-Man	0	0	0	0	0	0	0	1
FBgn0285948	9142.99	0.96489	1.95192	0.192702	5.00717	5.52361e-07	4.81348e-06	RpL27A	0	0	0	0	0	0	0	0
FBgn0031703	592.648	0.964327	1.95115	0.170471	5.65684	1.54188e-08	1.75168e-07	CG12512	0	0	0	0	0	0	0	0
FBgn0001187	118.891	0.964254	1.95105	0.270055	3.57058	0.000356187	0.00164663	Hex-C	1	0	0	0	0	0	0	0
FBgn0037779	235.411	0.964001	1.95071	0.224503	4.29394	1.75532e-05	0.000111502	CG12811	0	0	0	0	0	0	0	0
FBgn0008635	3170.95	0.963488	1.95002	0.20171	4.77661	1.78276e-06	1.41003e-05	betaCOP	0	0	0	0	0	0	0	0
FBgn0031980	5125.95	0.963335	1.94981	0.185613	5.19003	2.1026e-07	1.96023e-06	RpL36A	0	0	0	0	0	0	0	0
FBgn0030208	581.71	0.961702	1.94761	0.18529	5.19027	2.09994e-07	1.95901e-06	PPP4R2r	0	0	0	0	0	0	0	0
FBgn0037328	5067.53	0.961427	1.94724	0.201718	4.7662	1.87732e-06	1.47919e-05	RpL35A	0	0	0	0	0	0	0	0
FBgn0261597	8755.11	0.960692	1.94624	0.193316	4.96955	6.71101e-07	5.75857e-06	RpS26	0	0	0	0	0	0	0	0
FBgn0010348	6572.23	0.959728	1.94494	0.19635	4.88785	1.01945e-06	8.42481e-06	Arf79F	0	0	0	0	0	0	0	1
FBgn0062440	151.344	0.959046	1.94402	0.249862	3.8383	0.00012389	0.000651126	EMRE	1	0	0	0	0	0	0	0
FBgn0011272	6894.13	0.958492	1.94328	0.198116	4.83803	1.31134e-06	1.06022e-05	RpL13	0	0	0	0	0	0	0	0
FBgn0069242	2075.6	0.957665	1.94216	0.21427	4.46943	7.84277e-06	5.40416e-05	eca	0	0	0	0	0	0	0	0
FBgn0034697	1632.48	0.957382	1.94178	0.172987	5.53442	3.12256e-08	3.34383e-07	GM130	0	0	0	0	0	0	0	0
FBgn0034394	1289.61	0.957214	1.94156	0.188603	5.07528	3.86923e-07	3.48015e-06	CG15096	0	0	0	0	0	0	0	0
FBgn0032171	361.302	0.95657	1.94069	0.180487	5.29994	1.1584e-07	1.1284e-06	CG5846	0	0	0	0	0	0	0	0
FBgn0263329	376.63	0.956089	1.94004	0.17912	5.33771	9.41263e-08	9.3312e-07	lncRNA:CR43410	0	0	0	0	0	0	0	0
FBgn0015039	19.2975	1.01588	2.02214	0.505781	2.00854	0.0445857	0.100645	Cyp9b2	0	0	0	0	0	0	0	0
FBgn0002590	9407.72	0.955765	1.93961	0.20729	4.61077	4.01176e-06	2.95757e-05	RpS5a	0	0	0	0	0	0	0	0
FBgn0025724	2578.89	0.955594	1.93938	0.21217	4.50391	6.67137e-06	4.66099e-05	beta'COP	0	0	0	0	0	0	0	0
FBgn0033799	525.709	0.955145	1.93877	0.159201	5.99963	1.97767e-09	2.53354e-08	GLaz	0	0	0	0	0	1	0	0
FBgn0039759	34.5538	0.95379	1.93695	0.388871	2.45271	0.0141784	0.0397032	CG9733	0	0	0	0	0	0	0	0
FBgn0039818	77.1221	0.952631	1.9354	0.369206	2.58021	0.00987389	0.0293895	CG11318	0	0	0	0	0	0	0	0
FBgn0010228	591.377	0.950736	1.93286	0.181499	5.23825	1.6211e-07	1.54195e-06	HmgZ	0	0	0	0	0	0	0	0
FBgn0050052	42.256	0.950009	1.93188	0.384894	2.46824	0.013578	0.0382872	Obp49a	0	0	0	0	0	0	0	0
FBgn0261258	1027.49	0.949782	1.93158	0.266312	3.56642	0.00036189	0.00166611	rgn	0	0	0	0	0	1	0	0
FBgn0263397	675.561	0.949247	1.93086	0.211995	4.47769	7.54554e-06	5.21168e-05	Ih	0	0	0	0	0	0	0	0
FBgn0005619	36.8334	0.947217	1.92815	0.393855	2.40499	0.0161731	0.0442668	Hdc	0	0	0	0	0	0	0	0
FBgn0031690	22794.1	0.946623	1.92736	0.14173	6.67903	2.40523e-11	3.93295e-10	CG7742	0	0	0	0	0	0	0	0
FBgn0053143	169.925	0.946613	1.92734	0.258225	3.66585	0.00024652	0.00119541	CG33143	0	0	0	0	0	0	0	0
FBgn0033321	59.9745	0.944318	1.92428	0.332575	2.83941	0.00451963	0.0150479	CG8738	0	0	0	0	0	0	0	0
FBgn0028327	3512.33	0.944072	1.92395	0.187959	5.02276	5.0935e-07	4.4681e-06	l(1)G0320	0	0	0	0	0	0	0	0
FBgn0034753	14651.7	0.943757	1.92353	0.187707	5.02781	4.96103e-07	4.37033e-06	CG2852	0	0	0	0	0	0	0	0
FBgn0033744	46.2431	0.942945	1.92245	0.364198	2.5891	0.00962279	0.0288039	Dh44-R2	0	0	0	0	0	0	0	0
FBgn0039298	3.25532	1.00628	2.00873	1.1911	0.844835	0.398203	0.549971	to	0	0	0	0	0	0	0	0
FBgn0260462	5190.33	0.942459	1.9218	0.130066	7.24602	4.29188e-13	8.72343e-12	CG12163	0	0	0	0	0	0	0	1
FBgn0039756	630.338	0.941673	1.92075	0.185807	5.06802	4.01969e-07	3.59548e-06	CG9743	0	0	0	0	0	0	0	0
FBgn0265157	47.5816	0.941574	1.92062	0.375917	2.50474	0.0122541	0.0351744	lncRNA:CR44226	0	0	0	0	0	0	0	0
FBgn0038790	79.1424	0.940812	1.91961	0.374829	2.50997	0.012074	0.0347465	MtnC	0	0	0	0	0	0	0	0
FBgn0028325	864.073	0.940354	1.919	0.173342	5.42484	5.8006e-08	5.90736e-07	Pdha	1	0	0	0	0	0	0	0
FBgn0031239	135.017	0.939553	1.91793	0.231745	4.05426	5.0293e-05	0.000289637	CG17075	0	0	0	0	0	0	0	0
FBgn0004865	74.5314	0.939344	1.91766	0.348076	2.69867	0.00696165	0.0218206	Eip78C	0	0	0	0	0	0	0	0
FBgn0038814	3.7604	1.00144	2.002	1.13404	0.883071	0.377198	0.52954	CG15923	0	0	0	0	0	0	0	0
FBgn0051632	10.7328	1.00039	2.00053	0.70461	1.41977	0.155674	0.272777	sens-2	0	0	0	0	0	0	0	0
FBgn0032059	897.285	0.938866	1.91702	0.132659	7.07728	1.47007e-12	2.80026e-11	PrBP	0	0	0	0	0	0	0	0
FBgn0005533	6860.62	0.937383	1.91505	0.202348	4.63254	3.6121e-06	2.69954e-05	RpS17	0	0	0	0	0	0	0	0
FBgn0032414	80.8663	0.937231	1.91485	0.388772	2.41074	0.01592	0.043747	CG17211	0	0	0	0	0	0	0	0
FBgn0014026	10901.6	0.9371	1.91468	0.195339	4.79731	1.60814e-06	1.27817e-05	RpL7A	0	0	0	0	0	0	0	0
FBgn0024244	182.465	0.936675	1.91411	0.269648	3.4737	0.000513333	0.00227206	drm	0	0	0	0	0	0	0	0
FBgn0033483	141.867	0.936322	1.91364	0.287691	3.25461	0.00113549	0.00456738	egr	0	0	1	1	1	1	0	0
FBgn0003517	12906.7	0.936219	1.91351	0.187012	5.0062	5.55147e-07	4.83059e-06	sta	0	0	0	0	0	0	0	0
FBgn0000317	522.145	0.934	1.91057	0.223923	4.17109	3.0315e-05	0.000182439	ck	0	0	0	0	0	0	0	0
FBgn0016032	54.2353	0.932743	1.9089	0.332473	2.80547	0.0050243	0.0165053	lbm	0	0	0	0	0	0	0	0
FBgn0261999	81.8525	0.932308	1.90833	0.350882	2.65704	0.00788296	0.0243155	Ca-Ma2d	0	0	0	0	0	0	0	0
FBgn0036109	60.3008	0.932006	1.90793	0.395796	2.35477	0.0185344	0.0495556	Cpr67Fa2	0	0	0	0	0	0	0	0
FBgn0264006	85.3169	0.930919	1.90649	0.312811	2.97598	0.00292058	0.0103691	dysc	0	0	0	0	0	0	0	0
FBgn0039640	191.185	0.930729	1.90624	0.219798	4.23448	2.29084e-05	0.000141806	CG14516	0	0	0	0	0	0	0	0
FBgn0036919	3040.35	0.930726	1.90624	0.208248	4.46931	7.84711e-06	5.40459e-05	Grasp65	0	0	0	0	0	0	0	0
FBgn0265276	207.052	0.930032	1.90532	0.229152	4.05858	4.93716e-05	0.000284782	l(3)neo38	0	0	0	0	0	0	0	0
FBgn0038665	3.22429	0.990232	1.9865	1.20777	0.819882	0.412284	0.563655	euc	0	0	0	0	0	0	0	0
[truncated: 12,579 more rows]

## Sheet: transcriptome comparing
# Data exported from Vedelek et al., 2018							our results
gene_id	locus	gene symbol	apical region (FPKM)	middle region (FPKM)	basal region (FPKM)	testis, mated 4-day male tissue specificity index	fold change from testis DEG	p-adjust from testis DEG
FBgn0000003	3R:6822497-6822796	7SLRNA:CR32864	0	0	0	-0.185695	#N/A	#N/A
FBgn0000008	2R:22136967-22174691	a	21.9942	13.5274	10.5213	-0.810808	1.69979	0.00123989
FBgn0000014	3R:16807213-16830049	abd-A	5.95172	8.98753	20.0238	-0.0338549	0.607925	0.000682644
FBgn0000015	3R:16927211-16972236	Abd-B	1.03269	2.43815	2.31102	-0.608972	2.68019	1.8931e-06
FBgn0000017	3L:16615865-16647882	Abl	37.4649	20.1351	19.7387	-0.723549	0.573748	0.000851605
FBgn0000018	2L:10973442-10975293	abo	61.9941	15.133	6.69911	0.970597	0.895692	0.409526
FBgn0000022	X:268508-470726	ac	0	0	0	-0.331594	#N/A	#N/A
FBgn0000024	3R:13222950-13259517	Ace	2.59666	2.27881	1.7093	-0.737067	1.10402	0.711529
FBgn0000028	X:15350238-15379064	acj6	23.0124	24.0063	25.7382	0.323911	0.76977	0.0253222
FBgn0000032	3R:29991143-29993411	Acph-1	75.7306	44.9582	33.2631	0.916109	0.982491	0.912379
FBgn0000036	3R:24393895-24457157	nAChRalpha1	1.89538	3.47323	2.08851	-0.503763	1.88859	0.000535226
FBgn0000037	2R:24377830-24390294	mAChR-A	1.46514	1.13703	1.04607	-0.645478	1.15308	0.669627
FBgn0000038	3L:4429348-4435993	nAChRbeta1	28.5833	9.07862	4.90049	-0.670489	2.00908	1.12021e-05
FBgn0000039	3R:24485427-24491147	nAChRalpha2	0	0.20234	0	-0.573125	8.79655	0.00309684
FBgn0000042	X:5900860-5905399	Act5C	142.284	219.189	235.43	-0.771186	0.964106	0.815889
FBgn0000043	2R:6013909-6015689	Act42A	149.722	211.57	223.203	0.648987	1.04831	0.720823
FBgn0000044	2R:20944020-20946431	Act57B	91.635	143.954	122.294	-0.746625	3.14893	2.5698e-18
FBgn0000045	3L:21985209-21987190	Act79B	4.10874	5.57823	4.51987	-0.297375	1.46197	0.184103
FBgn0000046	3R:13425832-13428375	Act87E	152.83	235.659	254.174	0.502303	0.869186	0.268859
FBgn0000047	3R:15439968-15442177	Act88F	0.233693	0.515602	0.258898	-0.222512	0.606336	0.591427
FBgn0000052	2L:6038116-6046050	ade2	13.8075	19.184	16.8581	-0.532628	0.424791	1.04174e-14
FBgn0000053	2L:7013395-7023898	ade3	16.4913	11.4237	5.13656	-0.404221	0.98499	0.956221
FBgn0000054	2R:6662264-6668085	Adf1	67.0672	13.1133	8.71195	-0.757993	#N/A	#N/A
FBgn0000055	2L:14599195-14689340	Adh	26.7343	45.5024	72.9753	-0.791969	#N/A	#N/A
FBgn0000056	2L:14599195-14689340	Adhr	0.654003	0.493323	0.357023	-0.791924	#N/A	#N/A
FBgn0000057	2R:18151703-18154060	adp	88.8015	96.6168	87.1537	4.59053	0.789357	0.0443056
FBgn0000061	2L:378111-387439	al	0	0	0	-0.313712	#N/A	#N/A
FBgn0000063	3R:17671270-17682515	Mps1	48.034	35.5216	25.654	0.169375	0.719688	0.00115638
FBgn0000064	3R:26254068-26261591	Ald	180.243	270.229	316.712	-0.291494	0.748348	0.00821925
FBgn0000071	3R:6761512-6765261	Ama	1.26711	0.912381	0.271982	-0.365573	11.7824	2.08019e-30
FBgn0000075	2L:19110153-19114110	amd	3.10107	4.45252	5.21165	0.43546	0.964151	0.890186
FBgn0000077	X:9243816-9247336	amx	2.05094	4.07844	6.57986	-1.26247	1.61243	0.0579574
FBgn0000078	2R:17124763-17126369	Amy-d	0.6411	3.42017	7.58384	-0.307107	2.49486	0.000166169
FBgn0000079	2R:17118635-17120303	Amy-p	0.824664	11.3034	45.2944	-0.282413	1.41556	0.19071
FBgn0000083	3R:21065240-21073319	AnxB9	71.9311	83.3498	151.853	-0.684125	1.14285	0.371965
FBgn0000084	X:20170221-20173514	AnxB10	42.0773	75.1424	86.1855	0.753832	0.588084	2.06223e-07
FBgn0000092	X:2685579-2693886	CG2650	1.97633	0.516798	0	-0.448497	1.18048	0.839751
FBgn0000094	3R:30209947-30210382	Anp	70.2518	129.65	64.1319	0.0290823	1.81389	0.754886
FBgn0000097	2L:2155752-2178754	aop	4.31778	2.68997	6.57067	-0.817215	1.15045	0.600855
FBgn0000100	3L:22075866-22077487	RpLP0	157.713	103.829	147.006	-0.522936	1.60678	0.00076118
FBgn0000108	X:530500-579044	Appl	2.99069	1.06841	1.01287	-0.738488	1.41575	0.239085
FBgn0000109	3L:1883794-1885019	Aprt	13.901	7.58048	16.2102	-0.536536	0.803751	0.303155
FBgn0000114	2L:12175003-12313438	bru1	175.654	252.64	275.957	2.23335	0.576666	6.93972e-05
FBgn0000115	3L:15983134-15988041	Arl1	85.7295	47.6713	43.5194	1.81925	1.27059	0.0961078
FBgn0000116	3L:9048780-9066027	Argk	159.631	144.33	172.339	-0.418937	0.878103	0.425531
FBgn0000117	X:1890255-1900646	arm	80.732	50.2788	60.5096	-0.780202	0.905349	0.461729
FBgn0000119	2R:13453639-13483229	arr	36.6018	17.4915	13.1255	0.370977	0.55508	0.00170897
FBgn0000120	2L:18078268-18081307	Arr1	13.5198	39.5218	36.2678	-0.584197	0.858309	0.381018
FBgn0000121	3L:8647144-8651011	Arr2	0	0	0.456583	-0.611751	#N/A	#N/A
FBgn0000137	X:268508-470726	ase	0	0	0	-0.270947	#N/A	#N/A
FBgn0000139	3R:24650124-24654820	ash2	50.7366	20.9597	25.5483	0.188775	0.841923	0.12733
FBgn0000140	3R:24753848-24760513	asp	54.8588	36.0399	24.2389	0.194131	0.562652	0.000200633
FBgn0000146	2L:10989400-11001476	aub	62.0232	5.65373	4.47999	0.141585	0.501785	4.22766e-10
FBgn0000147	3R:11963123-11967691	aurA	117.487	116.033	64.7948	3.49286	0.766074	0.00388492
FBgn0000150	3R:31744281-31746077	awd	151.49	196.344	223.317	0.896864	1.39712	0.0193944
FBgn0000152	X:16679296-16683895	Axs	12.0073	5.16946	5.88587	-1.05367	0.910221	0.794204
FBgn0000153	2L:13821247-13823979	b	1.19242	1.09892	2.20546	-0.420562	2.01569	0.0075259
FBgn0000157	2R:24814821-24835667	Dll	0	0.986355	2.1214	-0.627718	0.844589	0.558193
FBgn0000158	3R:25242019-25245057	bam	23.2567	1.86171	0	-0.206939	0.522289	0.000112022
FBgn0000163	X:17160005-17200705	baz	5.27053	5.177	7.02416	-0.28153	0.821734	0.219958
FBgn0000166	3R:6755841-6759466	bcd	1.3954	1.85045	1.01243	-0.293547	0.969904	0.948125
FBgn0000173	X:13996344-13999805	ben	74.9919	91.9167	96.1403	-1.16436	1.2536	0.0355685
FBgn0000179	X:4387675-4611385	bi	3.55052	0.525724	0.418671	-0.54014	1.1688	0.603826
FBgn0000180	2L:9983670-9995538	bib	7.4153	3.17357	1.23076	-0.544755	2.1678	2.75828e-05
FBgn0000181	2R:12870248-12871794	bic	141.787	200.037	208.003	0.626972	0.965444	0.782192
FBgn0000182	2L:16042046-16048757	BicC	128.443	186.135	169.15	0.191343	1.97572	0.530533
FBgn0000183	2L:17459604-17474773	BicD	34.7005	20.5293	25.0084	-0.635343	0.885884	0.471246
FBgn0000206	3R:25961993-25966948	boss	2.47975	5.16011	6.59647	-0.529734	0.6869	0.0279405
FBgn0000210	X:1523553-1669297	br	7.33842	2.68056	1.6099	-0.524794	#N/A	#N/A
FBgn0000212	3L:15970081-15982869	brm	15.2679	4.08364	6.92387	-0.892349	1.06535	0.798171
FBgn0000216	3L:14972666-14973198	Brd	0	0	0	-0.415585	#N/A	#N/A
FBgn0000221	X:4104341-4105791	brn	34.9532	22.2562	18.4219	3.50643	0.686619	0.00175093
FBgn0000227	2L:4682676-4687232	Bsg25A	0.248553	0	0	-0.185695	0.263681	0.344721
FBgn0000228	2L:5271727-5278548	Bsg25D	12.4602	1.9318	3.95153	-1.08336	2.35206	6.70213e-06
FBgn0000229	2L:10247501-10250501	bsk	58.7852	40.548	54.5547	-0.929582	1.13286	0.265524
FBgn0000233	X:9694185-9697558	btd	2.93352	2.29719	1.64903	-0.361496	0.868038	0.715366
FBgn0000239	2L:21174181-21179729	bur	75.9561	110.432	119.779	-0.0772499	0.601143	2.16672e-05
FBgn0000241	2R:23523855-23538499	bw	0.947848	1.21644	0.433871	-0.567966	2.6677	9.34625e-07
FBgn0000244	3R:9528237-9533011	by	4.54413	4.02576	6.51352	-1.19185	1.57012	0.012022
FBgn0000246	3R:15788520-15792579	c(3)G	17.4285	4.72855	3.11371	-0.382194	1.00201	0.992874
FBgn0000247	3R:29803195-29816451	ca	41.8423	18.261	13.3445	0.160592	0.592988	0.000430789
FBgn0000250	2L:16310955-16326207	cact	50.7399	42.5302	37.5725	-1.06125	1.03905	0.788838
FBgn0000251	2L:20770730-20783135	cad	98.9181	46.1004	13.5018	0.0618523	0.978876	0.905746
FBgn0000253	2R:12259397-12278809	Cam	204.673	282.577	302.195	-0.937864	1.05586	0.664022
FBgn0000256	2L:3872645-3902860	capu	167.231	258.035	284.44	4.53441	0.545497	6.72637e-06
FBgn0000257	X:19566018-19569401	car	20.8128	18.7248	15.9392	1.50884	1.04385	0.831719
FBgn0000259	X:11792532-11801587	CkIIbeta	102.53	89.8601	98.3228	-0.956329	1.23732	0.01972
FBgn0000261	3L:18822603-18828188	Cat	130.208	188.513	209.483	-0.506194	0.742695	0.0117119
FBgn0000273	2L:9682314-9699297	Pka-C1	18.2091	14.0422	17.9989	-1.30289	1.54222	0.0161391
FBgn0000274	3R:30695536-30697138	Pka-C2	127.17	188.274	194.541	4.7875	0.840379	0.196538
FBgn0000276	3R:30210873-30211273	CecA1	46.835	45.5853	70.1324	-0.222244	0.99478	0.992949
FBgn0000277	3R:30212155-30212568	CecA2	0	0	3.37745	-0.491409	3.94362	0.151451
FBgn0000278	3R:30213314-30213797	CecB	0	0	2.45963	-0.443352	2.73769	0.581283
FBgn0000279	3R:30216483-30216938	CecC	0	0	0	-0.414846	1.93492	0.463334
FBgn0000280	3R:30211526-30211753	Cec-Psi1	0	0	0	na	#N/A	#N/A
FBgn0000281	3R:30212902-30213142	Cec2	0	0	0	-0.267432	#N/A	#N/A
FBgn0000283	3R:15268661-15275241	Cp190	48.1056	16.7001	14.548	-0.793988	1.0199	0.922912
FBgn0000286	2L:4876890-4883107	Cf2	35.126	27.5694	20.491	-1.22935	0.727835	0.00832273
FBgn0000287	2L:11358872-11373636	salr	55.1567	98.3353	109.117	4.31629	0.130581	1.37174e-85
FBgn0000289	2R:14173692-14182838	cg	67.9876	33.1897	29.0685	-1.07792	0.963656	0.823265
FBgn0000299	2L:5029608-5037279	Col4a1	9.62507	15.3892	21.5125	-0.866235	1.40795	0.507459
FBgn0000303	3R:18705500-18732344	ChAT	1.15714	0.64468	0.691018	-0.695397	2.77471	0.0554227
FBgn0000307	2L:16342429-16352628	chif	12.3823	4.56505	6.61861	-0.920215	0.72969	0.0678281
FBgn0000308	2L:5972114-5981018	chic	155.023	179.74	213.473	-0.733078	1.20068	0.0494617
FBgn0000316	X:255673-267253	cin	27.1189	7.09596	12.141	-0.65398	1.17819	0.318054
FBgn0000317	2L:15044962-15057862	ck	5.053	4.59799	6.87998	-1.44544	1.91057	0.000182439
FBgn0000318	2L:5520134-5523898	cl	159.738	214.966	260.482	3.5268	1.00761	0.959686
FBgn0000319	X:15827985-15835490	Chc	77.402	61.47	66.4879	-1.5646	0.783488	0.0892337
FBgn0000320	2L:6527446-6546976	eya	41.6939	40.0163	31.9534	2.20497	0.892344	0.44382
FBgn0000326	2R:21617060-21619079	clt	17.5161	15.5179	17.3466	-1.93952	0.7427	0.0378819
FBgn0000330	X:7009005-7011145	cm	32.8275	10.1167	17.6116	-0.460566	1.55854	0.00159323
FBgn0000337	2R:7782796-7785585	cn	0	1.17218	1.97975	1.9543	#N/A	#N/A
FBgn0000339	2L:16309291-16310726	cni	110.587	74.5709	47.7261	0.712292	1.28982	0.025659
FBgn0000346	X:13259020-13262488	comt	77.7095	59.1257	41.0064	-0.222189	0.913943	0.593924
FBgn0000351	2L:6663663-6676635	cort	5.37725	1.22846	0.520755	-0.20609	5.37089	1.72834e-13
FBgn0000352	2R:7382175-7387115	cos	20.9704	3.62041	2.39055	-0.541203	0.560303	0.00143496
FBgn0000355	3L:8728480-8729066	Cp15	8.12538	19.5379	9.61109	-0.391837	33.25	1.78758e-43
FBgn0000356	3L:8731943-8732599	Cp16	0	0	0	-0.422745	#N/A	#N/A
FBgn0000357	3L:8726790-8727613	Cp18	12.7614	13.9127	17.3617	-0.382036	1.25486	0.513736
FBgn0000358	3L:8729864-8730604	Cp19	0	0.764469	0	-0.400449	#N/A	#N/A
FBgn0000359	X:8465689-8483885	Cp36	0.352174	0	0	-0.343709	#N/A	#N/A
FBgn0000360	X:8465689-8483885	Cp38	0	0.462328	0	-0.348753	1.00172	0.999254
FBgn0000370	2L:21310865-21319527	crc	135.92	166.439	186.669	-1.32302	1.52926	0.0027186
FBgn0000376	X:2732468-2738773	crm	7.45144	1.59145	1.20449	-0.498603	1.08831	0.76048
FBgn0000377	X:2247593-2249983	crn	18.1821	5.81195	6.06484	-0.210346	1.1203	0.560875
FBgn0000382	X:2094233-2115701	csw	22.71	7.12479	9.61683	-1.13085	1.26169	0.200053
FBgn0000384	2L:22981815-22992951	cta	15.9757	5.79932	5.75528	-0.591985	1.10324	0.664022
FBgn0000394	X:5689851-5695205	cv	5.65468	8.02074	14.081	-0.678506	1.44566	0.0880702
FBgn0000395	2R:21355014-21379464	cv-2	1.36549	3.86376	9.57573	-0.910337	0.868052	0.569615
FBgn0000404	3L:11826718-11833578	CycA	95.7075	86.0271	66.3447	-0.11993	0.734646	0.000937361
FBgn0000405	2R:22803520-22806948	CycB	102.471	108.309	57.5652	-0.0664629	1.00309	0.983714
FBgn0000406	2L:16788773-16790721	Cyt-b5-r	2.13443	4.66537	8.61777	-0.662864	0.773127	0.768533
FBgn0000409	2L:16719931-16722644	Cyt-c-p	74.4041	82.444	136.558	-0.686945	#N/A	#N/A
FBgn0000411	3L:14175609-14178620	D	9.58099	11.6153	4.92733	1.03301	0.401885	1.56024e-17
FBgn0000412	3R:9238082-9240654	D1	140.948	122.869	86.5963	0.180428	0.983776	0.932118
FBgn0000414	3L:16712125-16724575	Dab	2.52154	2.22452	3.44916	-1.13124	1.11952	0.64351
FBgn0000416	3R:30881791-30889062	Sap-r	127.825	146.731	202.973	-0.605343	0.876266	0.396435
FBgn0000422	2L:19114400-19120306	Ddc	14.6301	18.8655	20.1542	-0.292053	0.573639	3.90673e-06
FBgn0000426	2R:12182638-12185506	SmF	108.595	89.3592	80.9346	0.769713	1.09673	0.528098
FBgn0000427	X:7867160-7873640	43070	3.42895	2.92125	3.00759	-0.338534	1.12874	0.623336
FBgn0000439	3R:6791835-6802428	Dfd	0.846245	0.481521	0.387579	-0.668996	1.23146	0.828068
FBgn0000442	2L:784335-790798	Pkg21D	1.62948	0	0	-0.40205	#N/A	#N/A
FBgn0000447	3R:8651083-8654766	Dhod	137.137	210.642	233.152	4.78924	0.812601	0.0894532
FBgn0000448	2R:10203994-10237348	Hr3	15.6088	14.6636	9.54223	-0.491551	2.95343	0.321416
FBgn0000449	3L:4062291-4071717	dib	0.198394	0.684995	0	-0.185695	0.665295	0.558453
FBgn0000451	3L:10190275-10201837	ect	0.27781	0.679619	0.81138	-0.320858	0.749473	0.499082
FBgn0000454	3R:13782287-13785676	Dip-B	112.391	80.8733	117.636	0.440536	1.18972	0.152433
FBgn0000455	3R:12411808-12413759	Dip-C	71.445	53.3765	53.4712	0.266799	1.12966	0.251099
FBgn0000459	X:16210597-16216750	disco	7.57865	4.52321	2.94736	-0.584993	2.44491	9.94074e-09
FBgn0000463	3R:19302730-19326217	Dl	11.0107	11.2164	8.6076	-0.517504	0.941887	0.78877
FBgn0000464	2L:19586622-19732069	Lar	14.246	6.09879	6.00779	-0.730638	0.83578	0.679642
FBgn0000473	2R:6759714-6798941	Cyp6a2	0.833587	0.777897	5.40616	-0.0718625	3.83795	0.126136
FBgn0000477	3R:18019374-18021161	DNaseII	0.907374	0	0.944418	-0.964842	3.08994	2.17496e-05
FBgn0000479	X:3176439-3348400	dnc	4.71627	3.25745	6.09805	-1.30768	1.21578	0.339868
FBgn0000482	X:1523553-1669297	dor	14.6219	3.70919	4.72862	-0.180573	1.26691	0.268729
FBgn0000489	3L:15925804-15954797	Pka-C3	111.887	193.097	215.377	1.49569	0.845012	0.217139
FBgn0000490	2L:2428371-2459823	dpp	3.05875	8.81242	11.7101	-0.786565	1.74322	8.09753e-06
FBgn0000492	3R:29556385-29565244	Dr	4.53065	7.9123	10.3437	-0.950659	5.6829	3.95008e-13
FBgn0000497	2L:640012-715307	ds	3.08664	2.47814	1.83908	-0.436065	#N/A	#N/A
FBgn0000499	X:11355880-11358724	dsh	81.6077	105.716	110.971	4.34149	0.664318	6.05224e-05
FBgn0000500	3R:4186962-4196210	Dsk	0.735867	0.921845	0	-0.496721	0.603639	0.612883
FBgn0000504	3R:7920430-7967408	dsx	3.3424	1.04408	2.04465	-0.938284	1.30831	0.295103
FBgn0000520	X:2727697-2730042	dwg	5.89104	1.71491	0.945675	-0.700813	1.17454	0.411504
FBgn0000524	X:6533998-6538575	dx	12.6841	3.11454	4.50859	-0.480552	1.04887	0.860982
FBgn0000527	3R:21229838-21237177	e	0.79096	1.86646	4.95241	-0.250218	0.957121	0.899461
FBgn0000529	2L:19765775-19769067	bsh	0.249831	0	0	-0.709661	0.448066	0.510808
FBgn0000533	3R:15328728-15330408	ea	2.48744	1.56557	6.33797	-0.734425	1.7366	0.0813288
FBgn0000535	X:14955476-15009989	eag	0.33777	0.672571	0.121069	-0.7215	1.51186	0.443475
FBgn0000536	X:16278327-16285618	eas	46.5539	60.9714	61.4963	-0.917997	1.03052	0.829848
FBgn0000541	3L:233925-246912	E(bx)	65.964	48.602	44.338	-0.606689	0.574465	0.000737036
FBgn0000542	X:3811697-3862697	ec	6.05544	2.42224	4.66283	-0.426056	0.8701	0.537762
FBgn0000543	3L:2262918-2265857	ecd	51.3827	12.8026	8.43178	2.19298	0.754572	0.0576855
FBgn0000546	2R:6087872-6169087	EcR	0.890486	1.33453	0.664516	-1.10531	0.962577	0.922007
FBgn0000547	2L:4031376-4115749	ed	4.60911	5.02294	8.94688	-0.952433	1.4117	0.174367
FBgn0000551	3L:21296762-21297803	Edg78E	2.34244	3.30347	5.08381	-0.364036	0.413702	0.094309
FBgn0000552	3R:6684444-6685157	Edg84A	0	0	0	-0.185695	#N/A	#N/A
FBgn0000556	2R:11891134-11895762	eEF1alpha1	137.605	192.306	239.183	-1.69835	#N/A	#N/A
FBgn0000557	3R:31738467-31743306	eEF1alpha2	11.6457	6.76075	5.21609	-0.747534	0.952163	0.834623
FBgn0000559	2L:21677912-21682164	eEF2	147.638	136.486	191.513	-1.46241	1.34027	0.0420998
FBgn0000560	3L:21808702-21817600	eg	17.8343	11.0933	6.47621	4.13775	1.15254	0.396595
FBgn0000562	2R:23734903-23746829	egl	4.26312	7.07237	9.1244	-1.59317	1.25672	0.293478
FBgn0000564	3R:17446641-17448858	Eh	0.553508	0	0.70976	-0.379526	#N/A	#N/A
FBgn0000565	3L:15511051-15513202	Eip71CD	20.1328	15.4919	23.8683	-0.707266	1.06986	0.782648
FBgn0000566	2R:18627917-18629395	Eip55E	48.1338	28.8094	31.9211	-0.354129	2.44492	9.57875e-09
FBgn0000567	3L:17558671-17619325	Eip74EF	1.96901	3.47705	2.4692	-0.816577	2.22154	4.17554e-05
FBgn0000568	3L:17950952-18064696	Eip75B	7.43799	7.19906	5.96319	-0.917969	1.05267	0.838084
FBgn0000575	3L:737679-755489	emc	13.2278	7.3258	8.2652	-1.19405	1.65582	0.000872717
FBgn0000576	3R:13901852-13904620	ems	0	0.724454	1.18122	-0.457517	1.03417	0.943576
FBgn0000577	2R:11524005-11528210	en	11.3692	14.972	12.6398	-0.236536	2.59335	1.80287e-08
FBgn0000578	2R:19141631-19163705	ena	19.2726	4.35153	13.5823	-0.735458	0.867796	0.452241
FBgn0000579	2L:1724767-1729762	Eno	150.043	224.175	245.942	-0.0611952	0.921016	0.508397
FBgn0000581	2R:11452042-11465270	E(Pc)	55.0013	33.8136	27.6747	-0.0517115	0.536116	0.000696536
FBgn0000588	2L:11814155-11928572	esc	8.36367	5.12441	2.84095	-0.235922	1.12694	0.496166
FBgn0000591	3R:26040239-26041008	E(spl)m8-HLH	0	0	1.04914	-0.352845	1.25454	0.891847
FBgn0000592	3L:12188817-12193688	Est-6	8.40567	14.5354	14.8719	-0.0497885	0.649537	0.6621
FBgn0000594	3L:12188817-12193688	Est-P	1.2734	1.25502	1.7388	-0.199857	#N/A	#N/A
FBgn0000606	2R:9976995-9980795	eve	0	0	0	0.811823	0.0490361	2.61183e-05
FBgn0000611	X:15992467-15996509	exd	30.4645	18.3543	21.61	-1.26617	1.37937	0.0913742
FBgn0000615	2R:20667426-20673495	exu	128.631	191.416	204.669	4.086	0.61454	1.30523e-07
FBgn0000617	X:17842160-17844704	e(y)1	39.0988	11.8835	10.7193	0.00997712	1.03512	0.873753
FBgn0000618	X:11573730-11576620	e(y)2	46.8945	18.5135	17.9403	1.56712	1.50348	0.024939
FBgn0000625	3L:12462536-12468021	eyg	0.53031	0.830886	0.598147	-0.517304	3.24871	4.93942e-05
FBgn0000629	3L:10631078-10638130	E(z)	28.3019	15.3985	16.6812	-0.644268	1.00276	0.988408
FBgn0000633	2R:13623043-13749367	CG17716	1.38447	1.08819	0.75027	-0.671778	8.86356	5.24656e-26
FBgn0000635	X:4132886-4206093	Fas2	10.9875	7.36459	22.5071	-1.05406	1.1683	0.338902
FBgn0000636	2L:18320101-18393441	Fas3	4.9342	9.34246	42.1779	-0.533021	1.27289	0.0947629
FBgn0000639	3L:14094588-14098053	Fbp1	0.411995	0.248092	0.113312	-0.262325	1.04891	0.971203
FBgn0000640	2L:9426783-9431052	Fbp2	4.88949	1.66951	0	-0.312803	1.36735	0.448954
FBgn0000644	X:3173375-3174474	Fcp3C	2.37195	1.47635	3.31777	-0.457072	1.24253	0.720087
FBgn0000658	2R:18232760-18236311	fj	0	0	0	-0.454596	3.63275	0.10386
FBgn0000659	3R:28580975-28585264	fkh	0.0944796	0.139805	0.414655	-0.754275	2.81482	0.431859
FBgn0000662	2R:13819623-13824553	fl(2)d	25.7983	6.25075	8.36213	-1.26915	1.36771	0.0447084
FBgn0000667	X:2010859-2061915	Actn	15.1795	10.7394	21.2026	-0.748736	1.45116	0.0120643
FBgn0000709	X:21339740-21345088	fliI	17.688	5.05017	5.10088	-0.768508	0.862418	0.436072
FBgn0000711	X:10385959-10409817	flw	13.685	23.4999	24.77	-1.24916	2.0206	2.40801e-06
FBgn0000715	2R:9906293-9910457	FMRFa	0.233727	0.638554	0.794148	-0.81462	1.34326	0.639506
FBgn0000719	X:22824316-22885541	fog	1.53635	2.83032	5.14138	-1.27812	1.45391	0.0243572
FBgn0000721	2L:3622073-3656953	for	6.31481	7.8864	15.7946	-1.19545	1.11938	0.56675
FBgn0000723	3R:9365397-9394737	FER	13.7475	19.4126	18.8332	-1.24779	3.50666	4.66756e-27
FBgn0000808	X:11985153-11987764	gd	2.51313	0.420898	0.421733	0.527088	0.813131	0.707432
FBgn0000810	X:2242137-2246041	fs(1)K10	37.193	5.89151	3.90799	-0.521449	1.07036	0.694685
FBgn0000826	X:1356487-1357601	png	1.36996	0	0.665907	-0.227419	0.473619	0.00757725
FBgn0000927	X:2724285-2726577	fs(1)Ya	1.64091	0.987659	1.09146	-0.264144	1.23253	0.564197
FBgn0000928	X:2720467-2724158	fs(1)Yb	19.979	3.48908	3.29988	3.79267	0.851836	0.382915
FBgn0000964	2L:19464266-19467758	tj	4.07985	0.221112	0.330797	-0.838402	1.18449	0.555965
FBgn0000996	2R:15376618-15387851	dup	38.5299	12.7261	7.11316	-0.318629	1.11239	0.44778
FBgn0001075	2L:4198403-4221796	ft	3.54879	5.23642	4.37375	-0.353805	3.69092	2.63927e-11
FBgn0001077	3R:6864323-6866244	ftz	5.07999	12.0245	6.48622	3.90343	1.69361	0.0369353
FBgn0001078	3L:18750606-18801312	ftz-f1	13.5054	5.80236	3.35474	-0.86164	1.04219	0.878206
FBgn0001079	X:18657754-18662153	fu	8.34649	0.997483	1.207	-0.545525	0.80414	0.315649
FBgn0001083	X:11992914-12003914	fw	0.912275	1.004	0.819529	-0.852803	0.280812	0.0974608
FBgn0001084	2L:8400420-8403280	fy	13.3067	4.71752	3.80078	-0.179962	0.927608	0.728639
FBgn0001085	3L:14274342-14368639	fz	0.413554	0.522017	0.517286	-0.614696	1.38433	0.14246
FBgn0001086	2L:16310955-16326207	fzy	92.6773	68.8913	28.6251	0.967783	1.16474	0.187775
FBgn0001087	X:13727203-13736278	g	26.806	6.26007	6.21103	-1.02771	0.692669	0.059273
FBgn0001089	2L:6000227-6006827	Gal	47.8242	13.5758	16.5609	0.376221	1.24742	0.151347
FBgn0001090	X:18788463-18806363	bnb	63.4313	66.6447	97.1493	-0.824969	1.16368	0.404707
FBgn0001091	2R:7791900-7793380	Gapdh1	66.7945	45.3421	75.9581	-0.64539	1.7267	0.000154647
FBgn0001092	X:15868144-15869661	Gapdh2	63.8049	48.9878	102.849	-1.08985	1.46065	0.000287426
FBgn0001098	3R:23933911-23943101	Gdh	54.2262	39.6037	82.6579	-1.06991	1.61096	2.69954e-05
FBgn0001099	3L:15509060-15511047	gdl	156.955	243.444	211.598	3.94554	1.58365	0.000179398
FBgn0001104	3L:6972749-6980044	Galphai	15.1057	10.0589	18.5305	-0.638308	1.48417	0.0229189
FBgn0001105	X:15860114-15866175	Gbeta13F	78.2791	83.9687	89.5314	-0.679458	0.954089	0.778577
FBgn0001108	3L:13929386-13934656	DCTN1-p150	50.7731	32.4729	34.3457	0.688616	0.710848	0.0097836
FBgn0001112	3R:7252062-7265703	Gld	6.91135	7.98558	7.25773	-0.0451493	0.826257	0.863707
FBgn0001114	2L:8672697-8679812	Glt	9.58952	8.85413	7.05097	-1.00717	0.479851	0.360644
FBgn0001120	3L:14802379-14803360	gnu	4.55348	0.488077	1.33021	-0.266323	1.34693	0.560778
FBgn0001122	2R:10437984-10465701	Galphao	30.7902	23.873	20.9759	-0.7331	0.972892	0.881282
FBgn0001123	2R:23942537-23946936	Galphas	38.4144	50.3023	51.9376	-1.07905	0.438389	1.06228e-10
FBgn0001124	2R:16138351-16141928	Got1	147.827	227.956	241.501	4.06314	0.807839	0.044052
FBgn0001125	2L:1982216-1987758	Got2	137.545	209.698	229.406	1.06189	0.917448	0.45986
FBgn0001128	2L:5943642-5948968	Gpdh	34.4041	17.9848	56.1612	-0.884422	1.60992	5.38419e-05
FBgn0001133	2R:21009763-21011921	grau	28.6989	9.22996	9.43889	1.10402	0.886394	0.436263
FBgn0001134	3L:17823332-17841427	Grd	0.0753272	0	0.161203	-0.607642	1.67492	0.364228
FBgn0001137	2L:8415689-8433598	grk	1.80028	3.24574	5.31915	-0.989637	1.32924	0.312198
FBgn0001138	3R:8147367-8181444	grn	0.244774	0.111933	0.191656	-0.622819	0.887508	0.9248
FBgn0001139	3R:26041735-26052257	gro	66.8599	60.7324	55.2121	-0.477697	0.930612	0.558477
FBgn0001142	2L:114725-157666	Gs1	1.60898	2.2033	18.344	-0.446773	1.23342	0.327955
FBgn0001145	X:11422831-11430197	Gs2	7.37992	21.9693	92.3735	-0.998406	1.63999	8.72439e-08
FBgn0001147	2R:25040382-25052331	gsb-n	16.5824	29.6854	28.3235	-0.448497	6.41354	5.35751e-22
FBgn0001148	2R:25061963-25064643	gsb	1.49657	0.294222	0.425104	-0.267432	1.85951	0.2527
FBgn0001149	3R:12367816-12369268	GstD1	125.449	232.993	246.443	0.942286	1.22244	0.107915
FBgn0001150	X:2427112-2428967	gt	0	0	0.390525	-0.8723	2.49101	0.275699
FBgn0001168	3L:8675758-8679253	h	3.73246	4.2612	9.51784	-1.2896	1.43138	0.0411071
FBgn0001169	3R:20621937-20628915	H	54.7194	7.83382	7.37575	-0.478336	0.789534	0.193885
FBgn0001170	2L:6013058-6019402	H2.0	1.01088	0.537873	0.247132	-0.643038	0.673004	0.816835
FBgn0001174	2L:1517532-1518148	halo	0.658398	0.979177	0	-0.369926	3.09916	0.0330606
FBgn0001179	3L:10631078-10638130	hay	44.8406	8.10866	5.68785	-0.127768	0.746495	0.0245212
FBgn0001180	3R:8690979-8697822	hb	0.296034	0.777672	1.62248	-0.356932	2.46636	0.0233307
FBgn0001185	2L:16677184-16679691	her	27.6894	9.99216	7.15565	-1.50477	1.68603	0.000601746
FBgn0001186	X:9585674-9589813	Hex-A	14.0788	15.3349	53.088	-1.42841	1.23018	0.174058
FBgn0001187	2R:15218378-15241589	Hex-C	2.87269	2.98209	4.80581	-0.458608	1.95105	0.00164663
FBgn0001189	X:1669569-1692768	hfw	28.2636	15.1584	15.8797	-1.47339	1.0177	0.927792
FBgn0001197	3R:26866928-26869220	His2Av	137.491	131.544	122.201	-0.364913	1.26977	0.0132649
FBgn0001202	2L:19030843-19033498	hook	42.4108	28.8936	33.0018	-0.352002	0.909918	0.416171
FBgn0001206	X:10590919-10595855	Hmr	12.5091	9.51678	10.3814	-0.234756	0.747106	0.022433
FBgn0001208	3L:7760452-7763166	Hn	0.490794	0.270689	2.58852	-0.768727	0.351246	0.0460646
FBgn0001215	3R:28599833-28605777	Hrb98DE	160.402	208.653	242.339	0.492299	0.893918	0.268302
FBgn0001216	3L:13974060-13977761	Hsc70-1	130.475	220.042	239.986	3.42143	0.674463	0.00238098
FBgn0001217	3R:13044758-13047388	Hsc70-2	165.747	242.74	265.41	4.91738	0.771405	0.037343
FBgn0001218	X:11801695-11807117	Hsc70-3	140.234	122.094	149.601	-0.734542	2.49521	3.86304e-08
FBgn0001220	2R:14252597-14256192	Hsc70-5	148.441	215.478	222.953	3.4571	0.780167	0.0277569
FBgn0001222	2R:18130302-18134634	Hsf	61.5719	33.9554	30.4331	-0.179198	0.878049	0.29853
FBgn0001223	3L:9372721-9374964	Hsp22	65.3209	38.9238	128.011	0.618432	#N/A	#N/A
FBgn0001224	3L:9381881-9382765	Hsp23	158.577	218.158	294.554	-0.306008	1.09806	0.518906
FBgn0001225	3L:9376417-9377427	Hsp26	172.923	206.366	216.682	1.12363	0.788448	0.0122371
FBgn0001226	3L:9384062-9386463	Hsp27	167.676	142.986	186.198	-0.0336043	0.758397	0.00101164
FBgn0001227	3L:9377801-9381119	Hsp67Ba	33.8819	29.0377	45.0833	-0.253867	1.4221	0.0905122
FBgn0001228	3L:9372721-9374964	CG4456	178.835	259.172	307.389	1.14261	0.569075	6.56869e-05
FBgn0001229	3L:9371510-9372497	Hsp67Bc	22.2493	13.2301	46.9551	-0.36006	1.42984	0.381753
FBgn0001230	3R:24054390-24057310	Hsp68	150.197	108.601	111.192	1.41661	0.823502	0.0647194
FBgn0001233	3L:3192968-3197631	Hsp83	133.697	221.922	235.667	0.499356	0.753352	0.0326249
FBgn0001234	3R:21296126-21317836	Hsromega	26.5966	17.1211	40.4566	-1.39837	3.3567	1.58172e-13
FBgn0001235	3R:10507560-10645773	hth	0.933474	0.321544	0.155042	-1.15146	0.659293	0.192764
FBgn0001247	3L:20370312-20375896	Ide	67.4474	61.4015	60.2604	-0.721559	0.751124	0.00811865
FBgn0001248	3L:8356403-8360906	Idh	146.364	214.028	234.611	-0.00695809	1.05284	0.657383
FBgn0001250	X:16752188-16783434	if	3.10801	4.77358	6.75287	-1.191	1.22913	0.336318
FBgn0001253	3L:8372404-8391171	ImpE1	0.0499623	0.124994	0.0621488	-0.457315	2.27096	0.166375
FBgn0001254	3L:3510973-3512681	ImpE2	0	0	0	-0.356889	0.737284	0.855794
FBgn0001255	3R:8013790-8033009	ImpE3	8.01404	8.21929	4.05103	-0.435666	0.6647	0.176159
FBgn0001256	3L:13382764-13383999	ImpL1	0.297202	0.371751	0	-0.322274	0.794268	0.784358
FBgn0001257	3L:4224005-4236147	ImpL2	10.7888	11.2717	27.3787	-1.07819	1.37935	0.0625557
FBgn0001258	3L:6259104-6262694	ImpL3	27.1776	62.9898	79.9909	1.01382	0.647516	1.50256e-05
FBgn0001259	3L:20367197-20370259	in	0.954927	0	0	-0.0179819	0.805802	0.648363
FBgn0001263	2R:22854382-22858794	inaD	0.276442	0	0.345689	-0.630554	0.404215	0.21738
FBgn0001269	2R:11474464-11509695	inv	5.43711	8.71196	7.61069	0.76814	3.40341	1.33052e-22
FBgn0001276	2R:11359436-11360163	ix	1.65321	3.54659	4.95867	-1.17923	2.32607	0.00314088
FBgn0001280	3R:30037983-30039533	janA	147.798	193.616	217.001	3.56962	1.01599	0.927886
FBgn0001281	3R:30037983-30039533	janB	168.959	199.817	214.298	4.79297	0.747603	0.014046
FBgn0001285	2R:8691447-8696245	Jon44E	0	0	0.861009	-0.302437	#N/A	#N/A
FBgn0001291	2R:10096479-10099590	Jra	83.1627	81.9435	79.6291	0.76686	0.944584	0.672829
FBgn0001296	3R:12682185-12689367	kar	5.47075	4.1794	2.95606	-1.56056	2.13816	4.56519e-08
FBgn0001297	3R:29765994-29794113	kay	18.7425	12.2499	15.5412	-1.26959	0.947773	0.821189
FBgn0001301	2L:18129883-18138083	kel	44.7795	19.7264	10.972	0.204307	0.8737	0.463491
FBgn0001308	2R:16266959-16271971	Khc	57.1871	17.4607	25.1147	-1.01868	1.03796	0.868842
FBgn0001311	3R:5378092-5392866	kkv	7.52311	5.98414	9.1343	-0.299898	0.917195	0.712215
FBgn0001313	Y:573087-664173	kl-2	6.78613	14.3284	9.04446	-0.185695	0.417053	4.03595e-09
FBgn0001316	3L:434082-540614	klar	37.9822	19.4209	16.6106	-0.92844	0.775344	0.202564
FBgn0001319	2R:14772649-14807061	kn	0.0926949	0	0.133	-0.70636	1.36243	0.691528
FBgn0001320	3L:20692329-20695378	kni	2.32638	2.91012	1.69492	-1.12206	3.07384	1.47106e-05
FBgn0001321	3R:10122364-10125664	knk	5.64983	2.15489	2.63218	-0.629574	0.411362	0.00481844
FBgn0001323	3L:20597140-20620659	knrl	2.79289	0.982244	0.893769	-1.24627	4.61196	0.000762826
FBgn0001324	3L:19836613-19844944	kto	73.915	126.361	133.802	0.340716	0.754762	0.0130807
FBgn0001325	2R:25183627-25255318	Kr	3.1127	2.65534	2.68075	-0.314295	0.844352	0.463856
FBgn0001330	X:2225295-2242035	kz	10.1081	2.47053	1.37758	-0.188369	0.60148	0.00459532
FBgn0001341	X:629772-635545	l(1)1Bi	28.9532	13.9938	16.0207	-0.0428787	0.653595	0.000464647
FBgn0001404	X:2588502-2599111	egh	22.2191	10.7691	18.5313	-1.4217	1.11895	0.555841
FBgn0001491	X:11324293-11325308	l(1)10Bb	87.325	110.793	97.9467	2.10908	1.22517	0.0689638
FBgn0001565	X:21385517-21387946	Hlc	9.68246	7.08443	12.0131	-1.10265	1.59696	0.00162647
FBgn0001612	X:13736569-13744683	Grip91	34.8837	16.2566	10.145	-0.52739	0.756563	0.0432868
FBgn0001624	X:11369664-11409776	dlg1	12.7863	7.57144	14.5191	-1.29479	1.18511	0.462595
FBgn0001941	2L:5986347-5988854	ifc	74.3078	39.2865	44.0889	0.255677	1.13878	0.372973
FBgn0001942	2L:5981763-5985909	eIF4A	154.653	224.056	235.702	-0.557078	1.10961	0.321416
FBgn0001961	2L:13827940-13829741	Arpc1	127.798	127.281	131.673	3.30614	0.92755	0.55
FBgn0001965	2L:13813815-13819824	Sos	33.1442	8.17327	9.41876	-0.891952	0.668905	0.010564
FBgn0001967	2L:14019356-14020325	NimC3	3.34193	13.5216	6.19665	-0.166992	#N/A	#N/A
FBgn0001970	2L:14359251-14361411	Pgant35A	36.823	40.1165	43.6501	2.40228	0.210319	0.0810879
FBgn0001974	2L:15009938-15011764	l(2)35Bd	50.7016	33.7441	21.7164	0.303806	#N/A	#N/A
FBgn0001977	2L:15035393-15038861	CIAPIN1	51.8281	45.0157	35.3453	2.21285	1.11655	0.409079
FBgn0001978	2L:15113479-15118069	stc	90.1802	87.6279	63.9171	1.14495	1.24103	0.116831
FBgn0001981	2L:15333865-15336138	esg	46.7445	51.7811	24.9976	-0.398605	1.63534	0.00228127
FBgn0001983	2L:15423296-15425580	wor	0.305435	0.390975	0	-0.235922	5.55817	0.255557
FBgn0001986	2L:15752262-15755900	Mtr4	75.0762	32.6887	19.1649	0.993625	0.869657	0.453457
FBgn0001987	2L:15756001-15762758	Gli	5.28594	5.72414	11.927	-0.982029	0.957163	0.866544
FBgn0001989	2L:15749318-15751078	ND-B17	126.641	142.046	136.311	2.05511	1.13768	0.349617
FBgn0001990	2L:15764219-15768349	wek	38.4284	14.3532	12.4306	-0.0459817	1.65311	2.02006e-05
FBgn0001991	2L:16165830-16190540	Ca-alpha1D	24.0324	17.0363	14.8107	-0.731338	0.888377	0.526014
FBgn0001992	2L:16294182-16299858	Cyp303a1	4.12237	2.78754	5.20715	-0.261285	0.867329	0.589281
FBgn0001994	2L:16263555-16287730	crp	20.0598	10.1694	13.5042	-0.999506	1.05897	0.809007
FBgn0001995	2L:16327068-16329132	mRpL4	66.1508	27.8871	21.2265	1.31249	1.17741	0.267855
FBgn0002021	2L:19049075-19051612	l(2)37Bb	78.0444	81.6649	75.4332	4.6385	0.826517	0.0922744
FBgn0002022	2L:19041861-19045148	Catsup	99.3472	99.9747	81.7336	1.87576	1.27666	0.0447264
FBgn0002023	2L:19079255-19108427	Lim3	52.3062	25.2601	12.677	1.55428	1.09769	0.421286
FBgn0002031	2L:19121344-19123869	l(2)37Cc	142.967	198.331	206.146	1.79921	0.923002	0.514921
FBgn0002036	2L:19114400-19120306	CG10561	118.798	184.093	199.516	5.15322	0.683251	0.000600123
FBgn0002044	2L:19490261-19497978	swm	54.976	26.5783	22.3834	-0.158787	0.745421	0.0163751
FBgn0002069	2R:12875163-12883253	AspRS	62.7852	12.4289	25.0294	-1.04928	0.719574	0.155933
FBgn0002121	2L:9838-21376	l(2)gl	19.8556	15.4023	17.3529	-0.754071	1.00749	0.977746
FBgn0002174	2R:23705438-23709947	l(2)tid	187.831	275.338	290.245	5.02647	0.684229	8.48623e-05
FBgn0002183	3L:1871573-1876312	dre4	100.49	25.8374	16.8486	0.0474177	0.819104	0.275308
FBgn0002283	3L:16588474-16591050	l(3)73Ah	91.5118	79.8999	66.2417	1.29871	1.06214	0.607053
FBgn0002284	3L:16609399-16610418	Prosbeta6	146.703	202.41	186.338	1.40152	1.12752	0.312445
FBgn0002306	3R:7159228-7183702	sas	8.94721	2.006	1.02546	-0.725004	0.837326	0.23858
FBgn0002354	3R:13030912-13031598	l(3)87Df	57.8766	60.723	69.4297	3.8235	1.1221	0.490484
FBgn0002413	3R:31054084-31061210	dco	67.8147	35.5234	31.8989	-0.260461	1.03621	0.857213
FBgn0002431	3R:9711141-9725615	hyd	83.6323	59.2655	47.3801	-0.356374	0.551715	0.000748131
FBgn0002440	3L:6123933-6129890	l(3)mbn	1.75159	2.60761	1.58377	-0.197875	0.861686	0.806256
FBgn0002441	3R:27265456-27273273	l(3)mbt	44.3622	20.2896	17.3881	-0.157274	0.658907	0.000573083
FBgn0002466	3L:12507997-12515009	sti	49.9876	24.6673	13.6339	-0.204187	0.556829	0.000937361
FBgn0002521	4:1172468-1181628	pho	72.9301	72.8108	64.7993	-0.168336	1.09741	0.458486
FBgn0002522	3R:6661426-6678590	lab	9.57415	6.20473	7.83819	0.0308575	1.33664	0.144607
FBgn0002524	2L:15499126-15505018	lace	18.8171	9.64498	10.3532	-0.564819	1.46285	0.0436258
FBgn0002525	2L:5542479-5546642	Lam	116.746	68.7854	31.7956	0.334232	0.897547	0.551656
FBgn0002526	3L:6203830-6218022	LanA	6.99557	3.337	3.0841	-0.801917	1.43827	0.113625
FBgn0002531	2R:8430114-8431243	Lcp1	0	0.986219	0	-0.19439	#N/A	#N/A
FBgn0002533	2R:8433796-8434785	Lcp2	0.440242	0.994221	0	-0.197222	0.664902	0.705724
FBgn0002534	2R:8435309-8436095	Lcp3	0.855773	2.14526	4.78151	-0.191003	1.02321	0.987167
FBgn0002535	2R:8437646-8438495	Lcp4	0	0	0	-0.196616	#N/A	#N/A
FBgn0002542	3R:7920430-7967408	lds	74.8671	44.3831	16.3127	0.853908	0.818262	0.138886
FBgn0002543	2L:1380082-1420453	robo2	1.94198	1.37299	1.26287	-0.567974	0.742264	0.469667
FBgn0002552	2R:8914523-8918877	lin	35.0312	14.3952	10.5176	-0.205079	0.669606	0.00602565
FBgn0002561	X:268508-470726	l(1)sc	0	0	0	-0.267432	#N/A	#N/A
FBgn0002562	X:12490290-12492982	Lsp1alpha	0	0	0	-0.194402	4.1681	0.416324
FBgn0002563	2L:898499-901316	Lsp1beta	2.58227	2.24709	1.11933	-0.198328	2.36266	0.00798693
FBgn0002564	3L:66429-68995	Lsp1gamma	0.5545	0.65929	0.966771	-0.2109	0.500329	0.172642
FBgn0002565	3L:12129102-12131869	Lsp2	9.2086	4.06316	3.03713	-0.389854	1.35428	0.420558
FBgn0002566	2L:22924794-22943135	lt	48.7009	39.4251	46.2752	-1.77621	0.863336	0.184324
FBgn0002567	2R:9177863-9186342	Rab32	57.7231	80.9908	75.1077	-0.550917	1.99933	2.1972e-08
FBgn0002569	2R:8453626-8455782	Mal-A2	3.4115	3.331	2.61315	-0.172537	3.11926	0.0142899
FBgn0002570	2R:8447450-8451904	Mal-A1	0.354848	0.262731	48.3496	-0.268256	10.9657	5.82428e-05
FBgn0002571	2R:8455908-8457892	Mal-A3	0	0	0.773843	-0.0565825	#N/A	#N/A
FBgn0002573	3L:13396227-13401125	sens	11.1968	4.41103	1.79289	0.255046	1.51539	0.00909059
FBgn0002576	X:9284648-9303636	lz	0.583208	0.111361	0.325314	-0.788665	1.43282	0.622144
FBgn0002577	X:11754272-11769508	m	0.181666	0.878197	2.8008	-0.310302	2.47921	0.00759187
FBgn0002578	3R:26014720-26016487	Kaz-m1	0	0	6.28338	-0.309743	#N/A	#N/A
FBgn0002579	X:628337-629483	RpL36	150.976	178.488	226.82	0.470885	2.00982	1.28773e-06
FBgn0002590	X:17143587-17148264	RpS5a	143.409	122.35	192.1	-0.915477	1.93961	2.95757e-05
FBgn0002592	3R:26016513-26017470	E(spl)m2-BFM	0.423434	0	0	-0.47806	#N/A	#N/A
FBgn0002593	2L:419951-420864	RpLP1	166.299	173.553	215.577	-0.909129	2.07657	2.39425e-07
FBgn0002607	2R:24967876-24969547	RpL19	164.885	171.718	207.153	-0.913477	#N/A	#N/A
FBgn0002609	3R:26021822-26023127	E(spl)m3-HLH	1.32884	0	0	-0.437072	0.748524	0.649485
FBgn0002622	3R:23358811-23360207	RpS3	152.79	161.244	203.642	-0.0712337	1.44851	0.00893716
FBgn0002626	3R:30045228-30046161	RpL32	153.732	173.51	195.391	-0.369774	1.77308	0.000109516
FBgn0002629	3R:26023820-26024579	E(spl)m4-BFM	0.566071	0.740526	0.637735	-0.372412	0.497206	0.569615
FBgn0002631	3R:26028853-26029735	E(spl)m5-HLH	0	0	0	-0.307562	#N/A	#N/A
FBgn0002632	3R:26032910-26034047	E(spl)m6-BFM	0	0	0	-0.404281	#N/A	#N/A
FBgn0002633	3R:26037037-26038019	E(spl)m7-HLH	0.410378	0	0	-0.474302	#N/A	#N/A
FBgn0002638	3L:5930261-5932773	Rcc1	101.567	86.6617	69.315	0.783747	1.07215	0.607706
FBgn0002641	X:20429674-20433210	mal	7.92792	5.24997	5.34412	-0.247045	1.10725	0.616368
FBgn0002643	2R:13991202-14060356	mam	24.91	11.7693	10.3496	-0.766987	1.3062	0.102562
FBgn0002645	3R:32055278-32068441	Map205	91.7429	69.9548	64.6433	-0.559185	0.690728	0.00540454
FBgn0002673	2L:16257687-16261877	twe	127.668	146.175	99.0472	1.73323	0.898932	0.344732
FBgn0002707	X:4311988-4318801	mei-9	10.3131	2.10726	0.740783	-0.744074	0.808901	0.449503
FBgn0002709	X:17107581-17142990	mei-218	113.983	143.688	164.645	2.13345	1.059	0.960389
FBgn0002715	2R:22106106-22124566	mei-S332	103.766	142.567	158.744	4.05751	0.879008	0.265081
FBgn0002716	2R:19456169-19486837	mei-W68	10.3694	2.66258	0.941903	0.995957	0.579834	0.0375165
FBgn0002719	3R:12713102-12722442	Men	137.683	213.343	224.235	0.200235	0.752128	0.0103485
FBgn0002723	X:11616123-11621280	Met	12.7944	2.01122	2.20516	-1.42874	0.924216	0.8039
FBgn0002732	3R:26010892-26011568	E(spl)malpha-BFM	0	0	0	-0.446385	17.9809	0.0291785
FBgn0002733	3R:26005045-26006023	E(spl)mbeta-HLH	1.60079	0	0	-0.629921	7.21548	0.000245554
FBgn0002734	3R:25997620-25998633	E(spl)mdelta-HLH	0	0	0	-0.373545	19.7549	5.91495e-09
FBgn0002735	3R:25999850-26000761	E(spl)mgamma-HLH	0	0	0	-0.316806	27.1521	0.021701
FBgn0002736	2R:21128576-21142261	mago	53.0205	8.60672	3.53541	0.72524	1.00015	0.999559
FBgn0002772	3R:27657077-27660177	Mlc1	47.6481	75.5136	75.3593	-0.457045	2.72983	1.52071e-13
FBgn0002773	3R:30171437-30174551	Mlc2	32.1934	49.6492	47.2876	-0.468713	3.19474	4.53045e-16
FBgn0002774	2R:5974856-5980778	mle	67.1924	11.9417	9.06166	-0.646913	0.707814	0.0392184
FBgn0002775	3L:7094817-7125533	msl-3	56.0727	19.6454	10.2055	1.30017	0.967032	0.831213
FBgn0002778	3L:14985099-14991667	mnd	5.3109	5.71757	6.54602	-0.928318	1.46078	0.024428
FBgn0002780	3R:32052059-32054974	mod	77.8628	18.4781	21.7984	-0.686476	1.54474	0.0059947
FBgn0002781	3R:21350845-21377401	mod(mdg4)	132.29	56.1638	72.3597	-0.404499	0.803066	0.0690125
FBgn0002783	3R:15965445-15972913	mor	40.5885	15.737	16.7104	-0.483233	0.953168	0.783224
FBgn0002787	2R:24392128-24404527	Rpn8	159.743	161.601	157.128	1.70561	0.805408	0.016076
FBgn0002789	2R:13246669-13248880	Mp20	46.4373	71.4252	76.3182	-0.611426	1.30348	0.0559441
FBgn0002791	2R:23972430-23975408	mr	90.4627	67.4326	59.8289	2.03603	0.929628	0.527115
FBgn0002838	3R:26875851-26876562	ms(3)K81	67.882	73.7965	46.1957	4.5874	0.922023	0.577229
FBgn0002842	3L:21382500-21433134	sa	120.999	90.3461	50.8163	4.18127	0.827408	0.13244
FBgn0002855	2L:5892882-5893896	Acp26Aa	78.5427	49.2754	26.6636	-0.0487482	19.9856	1.94738e-06
FBgn0002856	2L:5892297-5892862	Acp26Ab	48.5869	30.4075	15.1754	-0.0435469	20.5854	8.86383e-15
FBgn0002862	3R:13827150-13828427	Mst87F	139.794	173.819	233.99	5.13861	0.766829	0.0280917
FBgn0002863	3R:24227022-24250248	Acp95EF	116.13	230.275	152.335	0.0854382	#N/A	#N/A
FBgn0002865	3R:28291337-28292656	Mst98Ca	142.143	183.177	197.279	4.38984	0.702385	0.00725079
FBgn0002868	3R:9783406-9784370	MtnA	132.852	225.627	251.723	3.92893	1.88553	3.71709e-09
FBgn0002869	3R:20503101-20503746	MtnB	0	0	8.28563	-0.338099	0.61086	0.70401
FBgn0002872	3L:1941067-1947475	mu2	45.6772	10.8108	3.6922	0.0238369	0.789687	0.180752
FBgn0002873	X:14247731-14258595	mud	109.925	115.441	87.0446	0.400224	0.800704	0.483018
FBgn0002878	X:13722245-13727113	mus101	22.2445	9.73618	2.23858	0.952031	0.734231	0.093507
FBgn0002887	2L:8438168-8442342	mus201	50.0732	17.9901	9.44215	-0.263016	0.86931	0.282194
FBgn0002891	2R:7793624-7806385	mus205	20.5515	2.16073	0.867016	0.0499568	0.568577	0.00949734
FBgn0002899	3L:8137807-8151813	mus301	16.1762	9.64035	9.42658	-0.088194	0.444969	1.82338e-10
FBgn0002901	3L:18109813-18112847	mus304	56.0182	20.7866	11.1297	0.659667	0.743086	0.0255618
FBgn0002905	3R:12705093-12712299	mus308	25.1986	5.97281	3.51545	0.204149	0.614602	0.00138616
FBgn0002906	3R:11735446-11741783	Blm	59.2423	58.3046	37.8184	0.498483	0.613434	0.000711619
FBgn0002909	3L:7329131-7333471	mus312	5.95935	4.5602	16.3995	0.502921	#N/A	#N/A
FBgn0002914	X:15853420-15857823	Myb	87.8654	121.668	125.179	0.664498	#N/A	#N/A
FBgn0002917	X:14266366-14277416	na	4.1988	3.39217	2.03813	-0.766301	0.701559	0.0473055
FBgn0002921	3R:20948713-20976239	Atpalpha	46.9573	58.8745	101.456	-0.86615	1.31042	0.0943556
FBgn0002922	3R:23711526-23718357	nau	0	0.543936	0.00313216	-0.658161	0.778472	0.878206
FBgn0002924	3R:29803195-29816451	ncd	66.931	33.357	27.9484	1.52164	0.578097	3.46908e-07
FBgn0002926	3L:6550737-6603366	ndl	2.66538	0.613625	0.427882	-0.340104	0.981667	0.965122
FBgn0002930	2R:7150702-7223378	nec	16.5625	21.6638	44.6803	-0.678559	1.15036	0.543094
FBgn0002931	2L:82420-87387	net	29.3814	50.7257	49.0844	2.33294	0.530443	1.44818e-06
FBgn0002932	3R:9020347-9042349	neur	27.6461	16.1072	8.09727	-0.330433	1.09066	0.706861
FBgn0002933	X:3176439-3348400	ng1	0	0	0	-0.211209	#N/A	#N/A
FBgn0002936	2L:877171-885141	ninaA	4.50783	11.2578	0.0579622	-0.57929	#N/A	#N/A
FBgn0002937	3R:13694052-13705402	ninaB	0.942977	0.620507	0.18438	-0.612548	0.784692	0.783193
FBgn0002938	2L:7377701-7384344	ninaC	0.213656	0.405392	0.134574	-0.617224	1.15676	0.83918
FBgn0002939	2L:18081627-18083608	ninaD	0.250666	1.36984	0.807633	0.202053	2.06321	0.534916
FBgn0002940	3R:19886254-19888206	ninaE	0.469695	0.259074	0	-0.598775	0.316169	0.044903
FBgn0002941	3R:21548660-21557182	slou	0.133156	0	0	-0.638104	#N/A	#N/A
FBgn0002945	3L:19003740-19045449	nkd	1.97744	3.75172	4.9836	-0.58814	2.6151	1.54549e-07
FBgn0002948	X:11580771-11585750	nod	2.20099	0.760763	0.646545	-0.35532	0.848317	0.651701
FBgn0002962	3R:19154096-19162300	nos	17.3759	2.53777	2.48512	-0.253157	1.09746	0.70352
FBgn0002973	2L:9437468-9464184	numb	71.1123	90.7015	89.0271	-0.0906744	0.737707	0.0028159
FBgn0002985	2L:3604223-3606756	odd	3.24793	4.35998	1.42134	-0.552127	0.991817	0.981611
FBgn0002989	2L:2988115-2992759	okr	23.8827	3.6941	2.57237	0.586718	0.657099	0.0051135
FBgn0003002	3R:4852812-4869979	opa	0.212235	0	0	-0.494204	1.29393	0.833304
FBgn0003008	2R:23967938-23970073	or	77.055	36.289	30.679	-0.196787	1.18028	0.228892
FBgn0003009	2R:23271256-23275536	ord	61.7151	59.5646	50.0394	3.99944	0.67313	4.35136e-05
FBgn0003011	3R:19659747-19663672	ort	3.38928	1.02595	0.554761	-0.695072	0.861151	0.722068
FBgn0003015	3R:8934278-8938395	osk	0.404346	0.329599	0.793927	-0.29387	#N/A	#N/A
FBgn0003016	2L:14599195-14689340	osp	5.32891	6.76954	12.237	-1.26948	0.85655	0.487215
FBgn0003023	X:8485007-8517029	otu	5.81989	3.93737	4.02657	-0.283413	1.01507	0.961263
FBgn0003028	X:4956645-5070929	ovo	0.904211	0.205918	0	-0.474827	2.26017	0.0108948
FBgn0003034	3L:13301634-13301922	SP	139.793	186.647	91.9381	0.150826	22.4721	6.05896e-09
FBgn0003041	3L:7896108-7911954	pbl	21.7861	31.8249	29.559	-0.319325	2.2361	2.69408e-09
FBgn0003042	3L:21304696-21318020	Pc	11.9382	2.96031	2.74548	-0.593563	0.988859	0.970768
FBgn0003044	2R:18135425-18139990	Pcl	72.5767	35.0312	21.9735	-0.324535	0.788369	0.148729
FBgn0003046	2L:7013395-7023898	Pcp	3.28838	1.46705	1.37408	-0.206287	0.711434	0.574701
FBgn0003048	X:2225295-2242035	pcx	20.747	10.0587	8.6554	-0.4075	0.555635	0.000935792
FBgn0003053	X:4617563-4627206	peb	28.6736	22.135	20.5509	0.311506	0.521981	2.77236e-05
FBgn0003057	X:17225156-17226867	CG10598	0.190662	0	0.239183	na	#N/A	#N/A
FBgn0003060	3R:13611582-13612433	CG9757	0	2.94626	4.45225	-0.261427	5.55827	4.89747e-05
FBgn0003062	2R:23072908-23074725	Fib	90.2013	63.8589	50.3371	2.25784	0.837673	0.0829864
FBgn0003065	3R:31763303-31764772	CG2150	0	1.17036	4.48227	-0.24457	0.330459	0.0188223
FBgn0003068	X:2685579-2693886	per	1.84118	1.10073	1.53121	-0.695934	0.848582	0.452155
FBgn0003071	2R:10109739-10117457	Pfk	139.705	212.178	241.038	2.26076	0.657284	0.00057779
FBgn0003074	2R:8910899-8914069	Pgi	142.783	197.09	224.553	2.01184	0.716659	0.000859198
FBgn0003076	3L:16122001-16128531	Pgm	17.0934	19.4623	26.049	-0.283292	0.990749	0.958325
FBgn0003079	X:2295465-2343870	Raf	23.7866	4.62589	4.61227	-0.86614	0.866366	0.436234
FBgn0003082	2R:7825288-7828678	phr	25.4847	5.44225	4.99425	2.42976	0.551127	4.27612e-05
FBgn0003086	X:3176439-3348400	Pig1	0	0	0	-0.239591	1.06254	0.973644
FBgn0003087	2L:10362988-10364092	pim	86.8577	104.604	56.1472	0.705009	1.08841	0.538694
FBgn0003089	3L:19294563-19337609	pip	18.9013	18.3212	16.6328	-0.514016	5.24677	8.54014e-20
FBgn0003090	2R:7150702-7223378	pk	1.71791	0.74526	1.03758	-0.511502	1.60916	0.041195
FBgn0003091	2R:16924654-16945126	Pkc53E	0.703034	0.550136	0.198405	-0.767013	14.7629	1.6329e-27
FBgn0003093	3R:29039155-29049148	Pkc98E	8.01254	5.37498	4.27178	-1.14364	1.12296	0.567736
FBgn0003114	2R:20262957-20263684	plu	4.78812	11.9562	5.66191	-0.240981	3.61205	0.00010344
FBgn0003116	X:2181210-2184668	pn	37.8145	22.0442	16.3249	0.583191	0.818849	0.125333
FBgn0003117	3R:16026078-16041796	pnr	0.837131	0.14398	0.390357	-0.793597	1.13191	0.867628
FBgn0003118	3R:23290230-23346167	pnt	1.62413	1.21766	2.47238	-1.42671	2.15694	0.000748938
FBgn0003124	3L:20309653-20313466	polo	138.251	169.728	112.393	0.574268	0.894439	0.346207
FBgn0003129	3R:8316983-8333792	Poxm	1.0626	1.98062	9.24126	0.799992	1.57626	0.0130015
FBgn0003130	2R:15762564-15855645	Poxn	0.273372	0.373137	0.292444	-0.448497	6.61229	6.36701e-10
FBgn0003132	X:15350238-15379064	Pp1-13C	122.776	184.045	195.242	3.87369	0.730916	0.00332906
FBgn0003134	3R:24518269-24522331	Pp1alpha-96A	88.1124	32.7228	27.0963	-1.27298	1.31236	0.134811
FBgn0003137	3R:28520664-28540324	Ppn	0.620186	1.08776	1.27963	-1.07711	0.595329	0.481357
FBgn0003139	X:6371064-6372915	PpV	18.8209	6.12833	11.1392	-0.149761	1.6811	0.000359631
FBgn0003140	2R:17955395-17956570	PpY-55A	90.3734	155.926	152.297	5.02618	0.905538	0.541797
FBgn0003141	2L:20066390-20075458	pr	45.8426	11.4102	13.6424	-1.15277	1.97819	8.64392e-05
FBgn0003145	2L:12082994-12086413	prd	23.6379	21.8117	13.744	0.0350401	12.1366	1.10752e-53
FBgn0003149	3L:8732857-8745310	Prm	25.5709	46.2087	32.2361	-0.533548	2.10177	1.02069e-06
FBgn0003159	X:2344948-2366356	CG2841	92.5085	159.204	171.768	1.39503	0.641256	0.00212488
FBgn0003162	2R:21175314-21182608	Pu	1.39081	1.56257	2.06589	-0.62052	0.438261	0.00304964
FBgn0003165	3R:9066342-9237682	pum	13.8827	6.98661	9.66436	-1.00601	0.831798	0.264919
FBgn0003169	3R:14619029-14625703	put	26.4329	12.6141	9.54197	-1.24742	1.08449	0.633199
FBgn0003174	2R:7282571-7300806	pwn	0.253887	0.167656	3.87271	-0.372169	0.687943	0.0877282
FBgn0003175	2R:22494296-22562065	px	17.8933	7.38842	6.1354	-1.54302	1.01919	0.936426
FBgn0003187	2L:17486805-17497697	qua	99.7713	165.619	178.62	2.57888	0.616692	9.89636e-05
FBgn0003189	X:16655358-16668712	r	38.4289	29.313	19.248	2.19232	0.712454	0.0520733
FBgn0003204	X:10711162-10757666	ras	9.46665	4.74896	9.35051	-1.16404	1.32266	0.129987
FBgn0003205	3R:9510560-9513067	Ras85D	38.7794	22.2104	28.1474	-1.05282	1.21408	0.113341
FBgn0003206	3L:4139075-4141398	Ras64B	42.4851	29.4197	29.8723	-0.720493	1.232	0.106035
FBgn0003209	2L:8709879-8740660	raw	9.84931	6.06269	6.69847	-1.41351	0.50876	8.85748e-06
FBgn0003210	X:4387675-4611385	rb	44.6233	23.3795	20.4371	-0.302914	0.759353	0.0989195
FBgn0003218	X:13762751-13779488	rdgB	47.8425	67.4023	68.1647	1.82242	0.857765	0.194339
FBgn0003227	3R:15804247-15832632	rec	5.71955	0.198063	0.752026	1.10029	0.345512	3.43375e-07
FBgn0003231	2L:19542467-19546959	ref(2)P	122.936	108.106	118.621	-0.552878	0.980217	0.876871
FBgn0003248	3R:18899422-18901019	Rh2	0.770417	1.22979	0.309476	-0.573238	1.04392	0.913243
FBgn0003249	3R:20081059-20082450	Rh3	0	0	0	-0.647954	1.23278	0.88445
FBgn0003250	3L:16852526-16862517	Rh4	22.0315	29.3579	23.3085	-0.552729	0.904186	0.564836
FBgn0003254	2R:19270077-19281396	rib	47.0099	44.3706	38.0301	4.25298	0.703482	0.0145096
FBgn0003255	2L:13980125-14001248	rk	0.488037	0.307482	0.350453	-0.757825	0.882416	0.752325
FBgn0003256	2R:1071461-1125927	rl	15.6972	6.91858	8.61728	-1.34404	1.32478	0.075752
FBgn0003257	3R:21065240-21073319	r-l	17.7652	2.21354	1.71471	-0.304048	0.919975	0.757881
FBgn0003261	3R:6000425-6008579	Rm62	101.629	54.5097	54.4174	-1.26377	1.12352	0.389258
FBgn0003267	3R:26876629-26881171	ro	1.54904	0.367757	1.25849	-0.333775	1.24963	0.622842
FBgn0003268	3R:31580950-31588244	rod	27.6387	9.02409	4.95387	-0.0808723	0.546053	0.000178967
FBgn0003270	2L:18596135-18596921	amos	0.541211	0	0	na	0.489699	0.677108
FBgn0003274	2R:16586128-16586732	RpLP2	193.621	275.895	292.495	0.97428	1.42298	0.00664061
FBgn0003275	3R:5371794-5372397	RpII18	157.814	231.803	252.62	4.59748	0.936767	0.688175
FBgn0003277	X:11562799-11570326	RpII215	22.0831	4.42619	5.92447	-0.84403	0.74026	0.185479
FBgn0003278	2L:404284-407969	RpI135	9.47527	1.28977	2.85458	-0.622726	0.744328	0.146955
FBgn0003279	3R:27922820-27937853	RpL4	149.42	119.427	164.761	-1.03527	1.68611	0.000577489
FBgn0003285	X:2739088-3134532	rst	0.404477	0.172535	0	-0.763974	2.25816	0.031592
FBgn0003292	3L:11584121-11587770	rt	2.14965	1.27271	0.727225	-0.630286	0.778785	0.441557
FBgn0003295	3L:1342492-1475257	ru	0	0.534532	0.386221	-0.709661	1.03581	0.966928
FBgn0003300	X:20690669-20697321	run	0.313199	0.400925	0.183696	-0.478292	#N/A	#N/A
FBgn0003301	X:14784663-14826073	rut	5.16102	2.32811	3.77186	-1.05879	0.736961	0.177693
FBgn0003302	X:6035752-6037800	rux	111.456	167.398	169.119	4.6233	1.01832	0.914176
FBgn0003308	3R:13032527-13038020	ry	4.34262	8.24148	8.60241	-1.10085	0.347274	2.97193e-09
FBgn0003310	2L:1049673-1077815	S	56.1508	33.5052	24.9321	-0.0369513	1.03412	0.859497
FBgn0003312	3R:11877234-11882534	sad	2.16279	0.500592	0.919315	-0.129277	0.805425	0.483888
FBgn0003313	2L:11484706-11486949	sala	1.60277	4.43821	6.31843	-0.166494	#N/A	#N/A
FBgn0003317	2R:7806483-7810067	sax	70.7384	34.1328	23.2863	-0.0782723	0.800765	0.0992144
FBgn0003319	3R:16116160-16146855	Sb	0.726468	0.68075	0.373988	-0.444536	0.883228	0.852036
FBgn0003321	X:10832751-10847092	sbr	80.6941	73.798	49.4273	0.609104	1.00124	0.993229
FBgn0003326	2R:12780540-12802010	sca	0.243139	0.255626	1.87738	-0.691022	0.495082	0.47514
FBgn0003328	2R:15248783-15258498	scb	7.39786	13.0623	42.6497	-0.204324	#N/A	#N/A
FBgn0003330	3R:27680430-27682029	Sce	46.0861	16.9353	10.6607	0.944471	0.93371	0.676517
FBgn0003334	3R:9631640-9637611	Scm	53.0355	22.3861	18.9781	-0.217073	0.814045	0.262758
FBgn0003339	3R:6823119-6849981	Scr	0.076962	0	0	-0.826289	34.3948	0.00791196
FBgn0003345	X:15804369-15827682	sd	50.5422	19.5677	24.1486	-1.07465	1.06633	0.743935
FBgn0003346	2L:19435849-19447317	RanGAP	113.173	144.099	146.672	0.656596	0.98479	0.910499
FBgn0003353	2R:24047144-24057599	sei	15.0464	2.61346	1.89361	-0.640129	0.530535	3.67851e-06
FBgn0003356	3R:29923753-29924615	Jon99Cii	0	0	19.9813	-0.369751	#N/A	#N/A
FBgn0003357	3R:29922215-29923455	Jon99Ciii	0	0	11.3071	-0.360907	#N/A	#N/A
FBgn0003358	3R:29925225-29926189	Jon99Ci	0	0.591358	21.3205	-0.279451	1.16449	0.929424
FBgn0003360	X:10772540-10786958	sesB	102.799	105.543	158.561	-0.833556	2.03826	1.03013e-07
FBgn0003366	X:11071440-11086299	sev	5.52671	4.59053	11.4682	0.130409	1.86164	0.00301498
FBgn0003371	X:2633951-2679553	sgg	104.119	134.11	145.15	-1.16208	0.738666	0.00530706
FBgn0003372	2L:4937408-4941423	Sgs1	0	0	0.166363	-0.194371	0.430244	0.203377
FBgn0003373	3L:11512220-11513402	Sgs3	0	0	0	-0.204686	0.444046	0.580935
FBgn0003374	X:3176439-3348400	Sgs4	0	0	0	-0.195137	0.562704	0.71859
FBgn0003375	3R:17595361-17596112	Sgs5	0	0	0	-0.202894	0.699814	0.830122
FBgn0003377	3L:11509860-11510247	Sgs7	0	0	2.69904	-0.192744	0.589345	0.748616
FBgn0003378	3L:11508966-11509394	Sgs8	0	4.64311	0	-0.194574	0.711427	0.840185
FBgn0003380	X:17924306-18063247	Sh	1.42249	1.17982	0.504891	-0.714309	1.36522	0.317032
FBgn0003382	2R:11324313-11336463	sha	0.497712	0.562297	1.77969	-0.214945	0.257121	2.79338e-07
FBgn0003386	2L:3718184-3729145	Shaw	18.6227	22.7924	19.1162	-0.558325	1.7046	2.96948e-07
FBgn0003388	3L:14614457-14622205	shd	19.77	17.4976	15.8758	-0.191384	0.942258	0.758773
FBgn0003390	X:6771224-6779659	shf	2.94439	7.2603	21.4917	0.168602	0.834695	0.267404
FBgn0003391	2R:21049653-21057197	shg	31.316	15.4383	22.4098	-0.518522	0.477851	0.000232385
FBgn0003392	X:15892115-15906716	shi	112.787	148.466	157.005	-0.625718	0.733989	0.0157144
FBgn0003396	2R:11135922-11217394	shn	32.2918	30.5036	26.8036	-1.78575	0.568642	0.00239179
FBgn0003401	2R:23841460-23843286	shu	22.8779	1.62418	1.86385	-0.11205	0.986754	0.956468
FBgn0003410	3L:16852526-16862517	sina	64.911	84.2399	76.9147	3.92309	0.94115	0.690369
FBgn0003411	X:11321578-11322357	sisA	1.57717	4.3378	10.6902	-0.185695	24.7101	3.444e-49
FBgn0003415	3L:20991672-21027434	skd	28.8858	16.4401	14.4351	-0.777183	0.597243	0.00159323
FBgn0003416	X:16350314-16356482	sl	7.1606	3.2941	3.70351	-0.483576	0.734841	0.331195
FBgn0003423	X:21373634-21385159	slgA	87.6442	132.565	130.821	-0.495943	0.909835	0.524409
FBgn0003429	3R:24662490-24711595	slo	2.73938	3.42621	3.0801	-0.624049	2.00746	6.73063e-05
FBgn0003430	2L:3825674-3827099	slp1	2.16945	4.36883	2.8567	-0.875351	0.221563	0.00386159
FBgn0003435	2R:19517863-19631508	sm	207.516	290.732	315.264	2.32478	0.904252	0.499139
FBgn0003444	2L:273835-283269	smo	9.38565	2.28011	2.69465	-0.660425	0.765166	0.225351
FBgn0003447	X:7956819-7986601	sn	27.5178	21.4122	30.0887	-0.757931	0.848532	0.400228
FBgn0003448	2L:15476592-15478260	sna	0	0	0	-0.293397	#N/A	#N/A
FBgn0003449	X:5309241-5310501	snf	118.275	36.1472	28.6091	0.948227	1.05482	0.771592
FBgn0003450	3R:13038374-13044086	snk	4.9934	4.51459	0	-0.37471	2.4788	0.00549894
FBgn0003459	3L:14402929-14409939	stwl	52.9157	13.998	6.34692	-0.117427	0.854514	0.282858
FBgn0003460	2R:7419349-7434872	so	12.0988	19.5324	20.4925	-0.0449669	1.00396	0.985498
FBgn0003462	3L:11112280-11113740	Sod1	135.699	150.451	146.634	0.0944474	1.06304	0.670321
FBgn0003463	X:15603282-15633434	sog	9.39462	21.0614	20.099	-1.23395	1.15374	0.658154
FBgn0003464	X:21350279-21357912	sol	26.9186	10.8783	10.4011	-0.730904	0.926928	0.680047
FBgn0003475	2L:20311218-20348386	spir	137.119	193.473	211.534	2.83578	0.842282	0.16119
FBgn0003479	3R:30052513-30056603	spn-A	46.9046	13.3	6.50687	2.44694	1.09862	0.548672
FBgn0003480	3R:14328050-14372951	spn-B	9.02003	3.05954	4.00951	0.0494195	0.885285	0.689659
FBgn0003482	3R:27165715-27167122	spn-D	1.46485	0.429302	0	-0.331271	2.12138	0.075011
FBgn0003483	3R:15837418-15844415	spn-E	33.5742	8.70854	6.28908	-0.132935	0.834201	0.358125
FBgn0003486	3L:5583668-5592571	spo	0.287108	0.182068	0	-0.267432	1.01983	0.990268
FBgn0003495	3R:27064989-27070070	spz	2.75627	8.11666	22.2439	-0.688321	1.08925	0.675918
FBgn0003499	3R:18090802-18135583	sr	0.30772	0.403697	0.19235	-0.997717	0.737771	0.548596
FBgn0003502	2L:8258372-8301079	Btk29A	10.1253	9.93197	15.5944	-0.71998	1.18057	0.391443
FBgn0003507	3R:15986151-16004081	srp	9.86693	10.4052	9.28556	-0.660043	1.45061	0.00892512
FBgn0003510	3R:30039718-30043071	Sry-alpha	6.88831	2.18397	1.68428	1.77867	#N/A	#N/A
FBgn0003511	3R:30039718-30043071	Sry-beta	38.6387	15.7837	12.3259	1.77867	#N/A	#N/A
FBgn0003512	3R:30043340-30044886	Sry-delta	53.1127	35.8463	25.2621	2.20693	0.867267	0.304448
FBgn0003513	3R:16374433-16403690	ss	0.513865	0.951289	0.547235	-0.554265	1.91479	0.0959166
FBgn0003514	X:6223060-6225140	sqh	85.5458	83.2984	109.928	-0.453615	1.3044	0.0132098
FBgn0003515	3L:16419596-16543370	st	0.44609	0.963692	0.186054	-0.135923	2.08667	0.295066
FBgn0003517	X:1481796-1483413	sta	147.679	142.909	182.551	-0.473893	1.91351	4.83059e-06
FBgn0003520	2R:18117895-18125779	stau	34.4998	28.909	31.3037	-1.14457	0.727726	0.0282947
FBgn0003525	3R:29251825-29255800	stg	1.64367	2.60937	2.57822	-0.423361	1.86048	0.0320328
FBgn0003527	2R:12570366-12571883	stil	98.3836	105.458	97.2667	3.3971	0.761084	0.0112206
FBgn0003545	2R:17744100-17748078	sub	99.4958	107.753	66.7926	2.10604	0.819302	0.0551313
FBgn0003557	2L:2037713-2044372	Su(dx)	19.8659	9.65205	13.1937	-1.43513	0.965787	0.873753
FBgn0003559	X:23096770-23101431	su(f)	20.6039	12.234	10.0959	-0.808817	1.14934	0.3303
FBgn0003567	3R:14302427-14308589	su(Hw)	45.5118	29.5669	16.1873	-0.0575253	0.673372	0.00342864
FBgn0003575	X:635889-643760	su(sable)	13.3911	15.5259	15.6619	-0.789054	1.11496	0.455984
FBgn0003598	3R:13264363-13272011	Su(var)3-7	41.739	9.99189	8.96671	-0.300763	0.69848	0.0178034
FBgn0003607	2L:8206170-8211122	Su(var)205	135.829	73.9778	67.271	0.19896	1.08864	0.543026
FBgn0003612	2R:9116121-9122000	Su(var)2-10	105.802	114.463	116.725	0.19052	0.703698	0.00521219
FBgn0003638	X:1012778-1046040	su(w[a])	41.2879	24.3972	17.3354	-0.509452	6.25365	1.26756e-17
FBgn0003651	3R:12258736-12302785	svp	10.9182	18.7111	19.5073	-0.733384	0.76902	0.109374
FBgn0003654	X:20227960-20236382	sw	16.8455	6.16988	8.50535	-0.195103	0.421269	2.55845e-05
FBgn0003655	X:6363417-6365708	swa	5.37259	4.56721	2.72308	-0.295408	0.636516	0.074867
FBgn0003656	X:7956819-7986601	sws	104.462	141.03	157.754	1.00563	0.645031	0.00190395
FBgn0003660	2R:10247813-10255495	Syb	134.009	170.108	184.283	0.244435	1.48802	9.97865e-05
FBgn0003676	3R:22489104-22491439	CCT1	110.5	34.093	42.0141	0.373872	0.903978	0.528444
FBgn0003683	3L:18592302-18593771	term	0	0	0	-0.185695	#N/A	#N/A
FBgn0003687	2R:21685282-21687642	Tbp	16.8363	3.35364	2.03558	-0.417872	1.31121	0.178374
FBgn0003701	2R:17860759-17865963	thr	52.8343	20.2803	9.03419	-0.127687	0.996891	0.987661
FBgn0003710	3L:4173883-4193788	tipE	14.5948	2.06735	1.98434	-0.756831	0.770541	0.135826
FBgn0003714	X:2442312-2443976	tko	54.1475	22.4185	21.9435	2.25244	1.39123	0.03068
FBgn0003716	2L:5216700-5271384	tkv	11.8915	6.11603	16.5916	-0.859711	1.28321	0.172823
FBgn0003719	3R:24749730-24753510	tld	0.196519	0.115168	0.22978	-0.696988	1.09356	0.884531
FBgn0003720	3R:30852314-30854400	tll	0	0	0	-0.249579	#N/A	#N/A
FBgn0003721	3R:15281370-15308779	Tm1	71.6487	77.2304	142.334	-0.975166	1.46765	0.00465207
FBgn0003731	2R:21522419-21559977	Egfr	1.85283	1.53468	1.99719	-1.25535	0.698199	0.0636001
FBgn0003732	2L:19447364-19453490	Top2	97.4633	14.7981	12.0088	-0.37591	#N/A	#N/A
FBgn0003733	2R:7705182-7709184	tor	6.70032	3.97206	2.09752	-0.296954	1.6072	0.00403093
FBgn0003741	3L:16588474-16591050	tra	31.6823	20.7019	14.3138	-1.1618	1.15703	0.575168
FBgn0003742	2R:14601277-14604337	tra2	140.861	75.3191	41.7482	2.99679	0.934024	0.687984
FBgn0003744	3L:19830863-19834304	trc	51.4737	31.9274	28.9673	-0.585709	0.964234	0.83215
FBgn0003747	X:5680616-5682488	Gr5a	3.81082	2.77522	3.03232	5.19947	0.230877	0.0799528
FBgn0003748	2R:21074017-21091004	Treh	106.39	175.888	201.303	-0.714748	0.779491	0.0699007
FBgn0003751	2L:10270050-10272324	trk	2.17386	0.51621	1.4075	-0.326427	0.5247	0.366578
FBgn0003861	3R:29914520-29920289	trp	0.55854	1.24915	1.28208	-0.609508	3.28232	0.00725873
FBgn0003862	3R:14261390-14286903	trx	19.8759	8.29861	6.51328	-1.1477	0.511668	0.000176865
FBgn0003863	2R:11344259-11345119	alphaTry	0	0.631772	110.215	-0.320675	#N/A	#N/A
FBgn0003865	X:11988061-11988948	tsg	0	0	0	na	#N/A	#N/A
FBgn0003866	2L:21828592-21837011	tsh	4.731	2.52676	4.25503	-0.482657	1.13538	0.52954
FBgn0003867	3R:21778113-21782536	tsl	0.7966	0.30489	0	-1.09382	0.550953	0.239301
FBgn0003870	3R:31713866-31735392	ttk	32.9206	20.326	25.987	-0.801238	1.06088	0.719618
FBgn0003882	3R:4387741-4389813	tub	38.0746	18.8229	11.4398	-0.901007	1.12641	0.417155
FBgn0003884	3R:7086598-7088839	alphaTub84B	135.663	188.69	209.193	1.45207	0.865318	0.151449
FBgn0003885	3R:7530752-7532732	alphaTub84D	136.077	180.72	205.472	4.66684	0.68496	0.000850256
FBgn0003886	3R:9731220-9733250	alphaTub85E	52.4375	164.588	200.527	4.9278	0.740987	0.0586469
FBgn0003887	2R:19447318-19451600	betaTub56D	138.022	159.235	189.934	-0.501345	#N/A	#N/A
FBgn0003888	2R:24305880-24313099	betaTub60D	74.2024	111.67	135.245	0.326789	0.927055	0.6712
FBgn0003889	3R:9408382-9410282	betaTub85D	130.439	176.217	186.128	5.03007	0.737217	0.0010884
FBgn0003890	3R:27967007-27988384	betaTub97EF	9.6978	7.40107	15.479	-0.914787	2.17281	4.46234e-06
FBgn0003891	2R:21183321-21192913	tud	54.755	36.6208	44.2175	-1.88212	0.418982	1.96945e-08
FBgn0003892	2R:8649648-8665223	ptc	10.6432	6.42445	3.71394	-0.51497	1.35678	0.155524
FBgn0003896	2L:18859506-18881261	tup	0.884532	3.55277	1.59719	-0.820189	1.40923	0.208953
FBgn0003900	2R:22985373-23048325	twi	33.5429	43.211	29.2717	4.31206	0.76259	0.0317819
FBgn0003916	2L:901490-901654	snRNA:U1:21D	0	0	0	na	#N/A	#N/A
FBgn0003920	X:16254671-16254863	snRNA:U2:14B	0	0	0	na	#N/A	#N/A
FBgn0003922	2L:19796364-19958424	snRNA:U2:38ABa	0	0	0	4.71826	#N/A	#N/A
FBgn0003923	2L:19796364-19958424	snRNA:U2:38ABb	0	0	0	na	#N/A	#N/A
FBgn0003926	2L:1432710-1432921	snRNA:U3:22A	18.3206	0	0	na	0.0958856	0.0300469
FBgn0003930	2L:21212321-21220572	snRNA:U4:39B	78.517	75.2096	0	-0.185695	1.31288	0.857445
FBgn0003931	2L:19796364-19958424	snRNA:U4:38AB	41.2872	79.5384	0	na	0.0201649	0.00164175
FBgn0003933	X:16254007-16254117	snRNA:U5:14B	0	0	0	na	#N/A	#N/A
FBgn0003934	2L:3043946-3056143	snRNA:U5:23D	0	0	0	na	#N/A	#N/A
FBgn0003935	2L:13244847-13244974	snRNA:U5:34A	0	0	0	na	#N/A	#N/A
FBgn0003936	2L:15751556-15751682	snRNA:U5:35D	0	0	0	na	#N/A	#N/A
FBgn0003938	3L:3090800-3090923	snRNA:U5:63BC	0	0	0	na	#N/A	#N/A
FBgn0003941	2L:4227698-4228561	RpL40	176.914	153.155	220.802	-1.67928	1.98136	5.42562e-06
FBgn0003942	2L:10408351-10410456	RpS27A	158.08	163.321	210.776	-1.20374	1.85546	1.39825e-05
FBgn0003943	3L:3899258-3903184	Ubi-p63E	45.506	64.1056	69.7201	4.93102	0.524354	1.99087e-08
FBgn0003944	3R:16656622-16734426	Ubx	0.224808	0.281005	2.18957	-0.532959	0.687015	0.345776
FBgn0003950	X:21093843-21116914	unc	30.2124	8.98307	6.86407	4.7388	0.690601	0.0493284
FBgn0003961	2L:7780084-7781415	Uro	0.843099	2.26777	2.16883	-0.152284	0.916383	0.867303
FBgn0003963	2L:476219-540560	ush	5.83426	2.51061	5.75818	-0.928985	1.24961	0.231262
FBgn0003964	X:2010859-2061915	usp	10.9238	4.2329	8.36078	-1.03732	1.60891	0.0013539
FBgn0003965	X:10923971-10925631	v	1.84652	0.76715	0.978283	-0.727477	0.763883	0.561513
FBgn0003969	X:15999950-16005812	vap	16.815	4.50866	9.52097	-1.04177	1.19971	0.287464
FBgn0003975	2R:12884631-12899385	vg	0.458011	0	0	-0.439799	1.44536	0.687872
FBgn0003977	2R:23359214-23366355	vir	15.263	2.94407	2.89267	-0.433797	0.733256	0.0826032
FBgn0003978	2L:20061421-20065679	vls	58.1786	9.87684	5.55009	1.4265	1.06133	0.768222
FBgn0003979	2L:5959595-5960340	Vm26Aa	0	0	0	-0.399492	#N/A	#N/A
FBgn0003980	2L:5957003-5957639	Vm26Ab	1.37792	0	2.21338	-0.427512	1.13397	0.882613
FBgn0003983	2L:13411140-13411631	Vm34Ca	0	0	0	-0.422576	#N/A	#N/A
FBgn0003984	3L:5813337-5845664	vn	1.17018	1.1264	1.65554	-1.19642	1.43571	0.119282
FBgn0003996	X:2739088-3134532	w	16.0585	21.9492	20.5977	0.373462	3.42172	6.50001e-33
FBgn0003997	3L:18167744-18185641	hid	14.7861	29.73	27.4742	-0.0164882	0.941146	0.784755
FBgn0004003	2R:19249394-19250917	wbl	23.3558	15.1236	46.3192	0.26709	6.16425	1.5977e-17
FBgn0004009	2L:7307158-7316265	wg	1.33947	0.692606	0.457491	-0.280738	#N/A	#N/A
FBgn0004028	X:18105567-18116922	wupA	34.4712	41.4692	53.2911	-0.580993	#N/A	#N/A
FBgn0004034	X:268508-470726	y	0.84937	0.859108	0.533532	-0.271847	1.07768	0.921677
FBgn0004045	X:10053810-10055498	Yp1	3.48418e-06	0	0	-0.645982	#N/A	#N/A
FBgn0004047	X:13759545-13761547	Yp3	11.4288	20.9321	14.4104	-0.619676	0.559083	0.0888679
FBgn0004049	3R:13428866-13434984	yrt	40.6403	24.9233	23.3261	-0.48386	0.795276	0.0729074
FBgn0004050	X:2444166-2470043	z	59.3649	47.6378	49.7179	1.59522	0.793278	0.0643191
FBgn0004052	3L:15509060-15511047	Z600	20.7025	13.4324	13.5152	2.15278	1.50909	0.493329
FBgn0004053	3R:6752863-6754194	zen	0.303644	0	0.337575	-0.333775	2.90237	0.150687
FBgn0004054	3R:6743134-6744136	zen2	0	0	0.485939	na	#N/A	#N/A
FBgn0004055	2R:25012061-25031737	uzip	6.56834	4.83899	23.069	-0.91919	1.59621	0.00812531
FBgn0004057	X:19667017-19675891	Zw	94.7777	107.84	95.3233	2.75307	0.955901	0.740235
FBgn0004066	X:16276269-16277587	Prosalpha4	99.3363	41.7594	61.924	0	1.13917	0.393574
FBgn0004087	3R:16481166-16482452	Dhfr	13.0961	3.94862	2.68345	0.5714	2.86249	1.85912e-07
FBgn0004101	2R:24342860-24376473	bs	11.6295	3.4075	3.67221	-0.93505	1.00986	0.970477
FBgn0004102	X:8630158-8650681	oc	10.0794	7.56	3.74236	0.147276	0.46329	1.75903e-11
FBgn0004103	3R:12423620-12425917	Pp1-87B	101.35	46.0198	55.0832	-1.66327	1.05429	0.75158
FBgn0004106	2L:10384738-10386262	Cdk1	86.8951	26.9228	8.20962	-0.0625341	0.907005	0.455014
FBgn0004107	3R:20735622-20739100	Cdk2	20.2202	5.6541	6.301	-0.370874	0.936732	0.765711
FBgn0004108	3L:16766071-16779736	Nrt	7.84724	2.12987	1.66766	-0.426579	1.0926	0.811088
FBgn0004110	3R:21378976-21381970	tin	0	0.245889	0	-0.267432	1.05377	0.968726
FBgn0004117	3R:15310192-15315197	Tm2	25.9954	38.2397	38.2605	-0.56199	2.51301	2.35121e-10
FBgn0004118	3R:24509227-24515106	nAChRbeta2	2.84138	1.22145	0.641345	-0.457763	2.24055	3.49679e-05
FBgn0004132	2R:7565872-7566738	boca	31.6646	12.9907	22.3542	0.250164	1.52382	0.013143
FBgn0004133	2R:7566808-7587079	blow	33.8171	40.7075	47.6772	1.33463	0.786002	0.0430157
FBgn0004143	X:7021607-7066052	nullo	2.78279	0	0.553456	na	2.48715	0.469355
FBgn0004167	3L:3336859-3368133	kst	2.82133	4.56061	7.9375	-1.2761	0.998881	0.996814
FBgn0004168	2R:19067154-19121958	5-HT1A	0.569512	0.227207	0.15083	-0.649278	5.22222	3.05392e-08
FBgn0004169	X:13593473-13602578	up	43.1966	75.652	72.5646	-0.584137	2.61073	6.09247e-10
FBgn0004170	X:268508-470726	sc	0	0	0	-0.360668	#N/A	#N/A
FBgn0004171	3R:28292797-28293863	Mst98Cb	118.192	182.188	182.966	4.78012	0.74035	0.012496
FBgn0004172	3R:7365849-7369305	Mst84Da	174.08	232.307	231.499	4.87582	0.946097	0.919624
FBgn0004173	3R:7365159-7365627	Mst84Db	156.323	223.805	220.493	5.18068	0.660258	0.000128833
FBgn0004174	3R:7364253-7364673	Mst84Dc	159.432	250.656	250.825	5.00929	0.746193	0.0252544
FBgn0004175	3R:7363306-7363773	Mst84Dd	179.343	269.309	228.507	5.10419	0.643864	0.000375184
FBgn0004177	2L:7827649-7833576	mts	103.728	66.4803	70.5165	-1.61401	1.18349	0.18184
FBgn0004179	3L:22267381-22273745	Csp	82.5395	63.934	54.0307	-1.01278	1.15446	0.253569
FBgn0004181	2R:25175125-25176715	Ebp	11.6982	3.19379	4.5915	0.047098	1.10463	0.868842
FBgn0004183	3R:4947932-4948096	snRNA:U1:82Eb	16.8505	0	0	-0.267432	1.27957	0.807267
FBgn0004185	3R:23859466-23859630	snRNA:U1:95Ca	0	0	0	-0.312688	#N/A	#N/A
FBgn0004186	3R:23801713-23859167	snRNA:U1:95Cb	0	0	0	na	5.36892	5.3987e-05
FBgn0004187	3R:23801713-23859167	snRNA:U1:95Cc	92.4397	91.5673	77.9113	na	3.42517	2.31772e-10
FBgn0004188	3R:24544718-24556549	snRNA:U6:96Aa	0	0	0	-0.185695	#N/A	#N/A
FBgn0004189	3R:24556691-24556798	snRNA:U6:96Ab	0	0	0	-0.185695	1.02643	0.988054
FBgn0004190	3R:24557214-24557321	snRNA:U6:96Ac	0	0	0	na	#N/A	#N/A
FBgn0004191	2L:13211924-13212116	snRNA:U2:34ABa	26.0698	53.3519	66.166	2.07619	0.127076	9.84731e-09
FBgn0004192	2L:13215838-13216030	snRNA:U2:34ABb	0	0	0	na	#N/A	#N/A
FBgn0004197	3R:27172089-27194267	Ser	12.4655	23.4764	21.4668	0.0440121	1.48566	0.0838814
FBgn0004198	X:7609147-7678859	ct	9.3326	7.82412	6.31454	-0.664446	0.577149	0.00319254
FBgn0004227	X:16361568-16371547	nonA	52.6903	15.0214	12.4029	-1.176	0.790565	0.20092
FBgn0004228	3L:15517423-15519592	mex1	40.7054	63.3392	47.6062	-0.289998	0.750187	0.0560176
FBgn0004237	3R:13656845-13660531	Hrb87F	145.452	99.3281	75.9003	-0.40468	1.12783	0.390897
FBgn0004240	2R:18865764-18866260	DptA	17.4462	10.5848	5.90736	-0.626632	1.21426	0.57352
FBgn0004242	2L:2772326-2799979	Syt1	0.761776	0.516027	0.904189	-0.758426	0.6139	0.204446
FBgn0004244	3L:9145837-9182149	Rdl	5.35886	9.97475	12.0736	-0.543063	1.70176	0.0040777
FBgn0004359	3R:26881733-26912886	T48	2.46199	3.51487	8.87276	-0.682012	1.1841	0.334817
FBgn0004360	2R:9494165-9503188	Wnt2	8.2983	9.07297	21.9175	2.77518	1.23063	0.11356
FBgn0004362	2R:21697487-21716727	HmgD	105.938	61.3733	52.5606	-0.46094	0.953394	0.706663
FBgn0004363	2L:10847226-10856644	porin	182.222	229.358	259.042	0.202818	1.14233	0.187456
FBgn0004364	2R:20111510-20116932	18w	2.21111	2.37307	4.9786	-1.1471	1.23115	0.327242
FBgn0004367	X:16391697-16405122	mei-41	7.33044	1.52128	0.973827	0.587753	0.498542	0.000148718
FBgn0004368	X:4939127-4955916	Ptp4E	13.5772	9.86011	14.562	-0.678132	0.726183	0.0853389
FBgn0004369	3R:29377645-29489265	Ptp99A	1.41066	1.96219	3.5439	-1.19911	1.50581	0.0715727
FBgn0004370	X:11622014-11677338	Ptp10D	27.5121	35.0562	29.7707	-1.05459	5.9943	2.2127e-27
FBgn0004372	3L:3024128-3026521	aly	69.6301	20.9203	9.28683	4.71065	0.794997	0.12997
FBgn0004373	3L:305392-319884	fwd	75.2467	101.476	92.1456	-0.125199	0.751974	0.0388988
FBgn0004374	2L:20075756-20091348	neb	77.514	75.8065	27.4474	4.81457	1.20575	0.137365
FBgn0004378	3L:1235725-1245910	Klp61F	39.8403	9.54144	5.98296	-0.0211193	0.77458	0.0971122
FBgn0004379	3L:9362107-9367046	Klp67A	90.8057	86.0755	50.6459	1.0979	0.989766	0.951845
FBgn0004380	3L:5356863-5359392	Klp64D	22.2434	7.01037	7.99972	-1.19332	0.859302	0.375855
FBgn0004381	3L:11795613-11798875	Klp68D	8.81758	1.38334	6.22456	-0.879164	1.34912	0.105342
FBgn0004387	3R:27547774-27559145	Klp98A	32.7005	25.1054	19.0078	1.1759	0.751046	0.0481862
FBgn0004389	3R:31178388-31195762	bnk	0	0	0	-0.185695	0.53822	0.540792
FBgn0004390	3L:9839092-9855285	RasGAP1	15.002	1.62842	2.30629	-0.920551	0.873443	0.583239
FBgn0004391	X:15453470-15462441	shtd	31.4537	26.5271	24.5155	1.01135	0.793226	0.21828
FBgn0004394	2L:12657164-12686306	pdm2	0.243087	0.492862	0	-0.770728	0.729558	0.778706
FBgn0004395	3R:23149652-23157862	unk	4.52077	1.796	2.85322	-1.31152	1.24047	0.413553
FBgn0004396	3L:15535394-15553214	CrebA	6.57047	7.88053	14.4226	-0.42298	2.27321	9.34061e-06
FBgn0004397	X:2214346-2222567	Vinc	8.21993	13.1005	24.4157	-1.65424	1.10247	0.600115
FBgn0004400	2R:17604950-17639138	rhi	10.4796	0	0	-0.154368	0.79772	0.408826
FBgn0004401	3L:17638102-17645036	Pep	136.036	49.584	44.8115	-0.593451	0.840137	0.242443
FBgn0004403	X:7933741-7934677	RpS14a	89.0022	81.888	99.8232	-0.442106	2.41585	2.15937e-09
FBgn0004404	X:7934897-7935792	RpS14b	55.7905	46.2566	56.5383	0.340379	0.956092	0.842343
FBgn0004406	2L:13823979-13827772	tam	28.141	20.6623	19.0654	1.54568	0.510008	2.47203e-05
FBgn0004407	2L:13829836-13833105	DNApol-gamma35	61.3522	29.4219	30.4491	3.62231	#N/A	#N/A
FBgn0004414	3L:22082719-22083367	msopa	153.247	137.213	51.7467	-0.0334611	35.0009	5.59388e-14
FBgn0004419	2L:10239340-10242172	me31B	118.166	123.9	121.476	-0.304354	1.00491	0.970781
FBgn0004425	3L:1200785-1232700	LysB	1.98558	0	5.96058	-0.380007	555.535	1.52435e-15
FBgn0004426	3L:1200785-1232700	LysC	0	0	48.5595	-0.395266	#N/A	#N/A
FBgn0004427	3L:1200785-1232700	LysD	19.8482	6.83405	37.699	-0.372853	10.1663	8.68028e-17
FBgn0004428	3L:1200785-1232700	LysE	3.67861	2.85978	3.38964	-0.365328	99.1381	1.60078e-30
FBgn0004429	3L:1200785-1232700	LysP	4.0492	4.442	0.852638	-0.504888	1.33035	0.611757
FBgn0004430	3L:1200785-1232700	LysS	0	0	0	-0.24455	2.06712	0.393574
FBgn0004431	3L:1194738-1195302	LysX	0	0	1.59433	-0.273877	3.64564	0.0206296
FBgn0004432	X:16313708-16320370	Cyp1	105.884	84.3625	119.272	-1.05767	1.33903	0.0191882
FBgn0004435	2R:12612739-12623197	Galphaq	52.0556	40.9393	51.4387	-1.03219	1.392	0.0583358
FBgn0004436	3R:4948754-4952682	Ubc6	101.899	106.37	93.8262	-1.7751	1.05066	0.722041
FBgn0004449	3L:22293043-22407863	Ten-m	7.35207	5.86813	7.32859	-0.923614	0.705499	0.13003
FBgn0004456	X:13214408-13258495	mew	5.08886	5.8139	9.10387	-1.32987	1.18974	0.423278
FBgn0004462	X:18788463-18806363	S6KL	41.799	27.6437	21.0777	-0.913416	#N/A	#N/A
FBgn0004463	2R:12039040-12042623	RpIII128	25.9985	2.94307	1.75954	-0.215543	0.739782	0.105162
FBgn0004465	3L:16610661-16612199	Su(P)	58.072	28.4361	23.4266	2.04523	0.962744	0.831481
FBgn0004507	2L:2130812-2137296	GlyP	18.9998	23.6214	51.7514	-0.740909	1.79671	0.00169789
FBgn0004509	3R:25347430-25473058	Fur1	15.1059	14.7491	23.4135	-1.16926	0.92533	0.662415
FBgn0004510	3R:26881733-26912886	Ets97D	44.7438	23.15	15.412	0.957657	1.09271	0.535965
FBgn0004511	X:11769768-11778784	dy	0.0852323	0	0	-0.3669	0.389234	0.432142
FBgn0004512	2R:12936890-12946347	Mdr49	8.17166	7.95159	6.09045	-0.501311	2.88291	1.33575e-08
FBgn0004513	3L:6240499-6245746	Mdr65	0.40988	0.387515	0.435513	-0.682131	3.12866	0.000267308
FBgn0004514	3L:22035002-22065279	Oct-TyrR	0.630733	0.523392	0.104375	-0.530258	2.46277	0.0433883
FBgn0004516	3L:4074076-4092706	Gad1	1.61649	1.7955	0.514993	-0.632123	0.662659	0.10896
FBgn0004552	3L:4141466-4142070	Akh	0	0	0	-0.550763	0.827573	0.897048
FBgn0004554	3R:17610855-17611511	Edg91	0	0	1.67046	-0.570618	#N/A	#N/A
FBgn0004556	3L:16728495-16730818	Dbp73D	32.9771	4.93496	3.11205	-0.143699	0.973594	0.909296
FBgn0004567	2L:3836839-3839185	slp2	0	0	0	-0.580047	1.81914	0.765747
FBgn0004569	3L:16419596-16543370	aos	2.1935	0.994936	1.91661	-1.26811	1.15231	0.680746
FBgn0004573	3R:30968235-31016875	5-HT7	1.20303	1.60198	1.44388	-0.830388	2.61582	0.000153715
FBgn0004574	3L:4136358-4138996	Rop	85.69	47.9455	35.7784	-0.186118	0.939603	0.691709
FBgn0004575	3R:10190688-10222442	Syn	0.446734	0.297161	0.724237	-0.734156	0.320966	5.724e-07
FBgn0004577	3R:17014575-17027987	Pxd	0.304019	0.600263	1.45013	-0.301172	1.78467	0.279694
FBgn0004580	2R:16973926-16998594	Cbp53E	2.51403	3.45147	6.91494	-0.71398	2.046	0.00110851
FBgn0004581	2R:23853269-23858921	bgcn	69.6092	69.5558	68.1008	3.7872	0.638246	0.000765494
FBgn0004583	2L:431226-453024	ex	3.41524	3.91614	4.39781	-0.721152	0.952041	0.856419
FBgn0004584	2L:2969772-2972508	Rrp1	71.0359	21.3483	16.7198	-0.0721689	0.704082	0.00367484
FBgn0004587	3R:13661310-13666891	B52	125.602	49.9739	43.0064	-0.999232	1.09654	0.545618
FBgn0004588	3L:15649125-15649661	Eig71Ea	1.21103	1.52087	0	-0.194428	0.433467	0.333073
FBgn0004589	3L:15649935-15650541	Eig71Eb	10.9902	16.3588	22.1081	-0.190534	1.18701	0.734215
FBgn0004590	3L:15651478-15652254	Eig71Ec	1.25227	0	3.48662	-0.188989	0.541411	0.529244
FBgn0004591	3L:15652536-15653096	Eig71Ed	1.36398	0	0	-0.19087	0.666161	0.683201
FBgn0004592	3L:15654471-15656010	Eig71Ee	0	0	0	-0.204791	0.73529	0.857195
FBgn0004593	3L:15656654-15657390	Eig71Ef	8.70027	14.6538	16.9247	-0.190235	0.184792	0.00106151
FBgn0004594	3L:15657627-15658149	Eig71Eg	2.41217	3.31843	1.61489	-0.190928	0.33537	0.249602
FBgn0004595	3R:11328479-11407627	pros	10.3733	17.9629	17.6712	-0.467754	0.610587	0.00719723
FBgn0004597	3R:14886455-14890205	CycC	43.6744	21.9962	19.3002	-0.0476792	1.18196	0.259722
FBgn0004598	X:16373085-16381782	Fur2	4.36065	3.78771	5.30985	-0.790729	0.973621	0.924515
FBgn0004606	3R:30765925-30789202	zfh1	24.9525	9.61587	3.3198	-0.666026	0.964919	0.863707
FBgn0004607	4:501809-557854	zfh2	0.384834	0.167552	0.1098	-0.85654	1.04507	0.916213
FBgn0004611	2L:305934-358174	Plc21C	7.53792	2.81712	3.67826	-1.07093	0.898471	0.533667
FBgn0004618	3R:18367926-18372738	gl	2.98172	2.52337	1.01123	-0.740426	0.413555	6.83049e-05
FBgn0004619	3L:6624031-6635059	GluRIA	2.42105	2.53275	1.97024	-0.606685	1.29127	0.250328
FBgn0004620	2L:5553896-5558994	GluRIIA	1.32763	2.91519	1.97074	-0.356603	1.40481	0.126979
FBgn0004622	3R:29950795-29969447	TkR99D	0.926072	1.18528	0.638741	-0.64631	1.56008	0.110109
FBgn0004623	3L:19687636-19689992	Gbeta76C	0	0.283475	0	-0.619253	1.72139	0.569615
FBgn0004629	3R:14568961-14569871	Cys	52.7289	133.914	245.246	-0.769618	#N/A	#N/A
FBgn0004635	3L:1342492-1475257	rho	0.282008	0.36842	3.68551	-1.21306	0.73376	0.293142
FBgn0004636	3L:1859114-1862239	Rap1	24.3896	13.8311	27.3406	-1.82251	1.46929	0.0294545
FBgn0004638	2R:13495221-13506011	drk	94.0716	76.8264	65.8159	-0.757553	1.37248	0.00351673
FBgn0004643	X:2604196-2608876	Zw10	18.9891	5.75794	6.58215	-0.392297	1.19624	0.276492
FBgn0004644	3R:23128168-23141906	hh	2.84883	8.93191	26.6937	0.279719	0.707241	0.00951379
FBgn0004646	X:6973619-6991318	ogre	35.6764	55.9194	65.1043	-0.711762	1.24916	0.0444825
FBgn0004647	X:3134869-3172221	N	6.40345	5.95461	6.36288	-0.496599	0.546639	0.00778
FBgn0004648	X:496445-509072	svr	11.5473	12.0446	35.5728	-1.6428	1.18493	0.383315
FBgn0004649	X:14193213-14199958	yl	5.24488	2.6163	1.23341	-0.287476	0.630416	0.0274409
FBgn0004650	X:1322512-1329438	fs(1)N	21.2513	31.9932	26.9941	0.177564	0.485413	3.28724e-07
FBgn0004652	3R:18414272-18545586	fru	32.1911	42.0897	37.5422	-0.0609387	0.935454	0.648079
FBgn0004654	X:2145135-2149647	Pgd	72.8626	72.3872	65.5449	0.778614	1.20949	0.0893965
FBgn0004655	X:2149935-2158983	wapl	21.2719	9.25898	5.95879	-0.349057	0.644015	0.0029723
FBgn0004656	X:8037807-8061436	fs(1)h	24.7857	7.08865	7.16356	-1.15873	0.874934	0.548427
FBgn0004657	X:8061644-8070237	mys	12.0852	16.646	40.4299	-0.987537	1.04201	0.889644
FBgn0004666	3R:13057754-13078124	sim	0.442633	0.742462	0.513017	-0.763766	1.94324	0.0813045
FBgn0004687	X:5619135-5622539	Mlc-c	117.825	145.476	164.137	-0.423272	1.29138	0.00346317
FBgn0004698	2R:15311509-15322171	Xpc	94.9875	75.0155	82.2235	-0.555101	0.758572	0.0326784
FBgn0004777	3R:6686727-6688039	Ccp84Ag	0.718803	0.939707	1.75691	-0.545389	2.22951	0.153641
FBgn0004778	3R:6689601-6690239	Ccp84Af	2.44183	3.92541	6.45399	na	0.700412	0.623505
FBgn0004779	3R:6690886-6691758	Ccp84Ae	1.71278	2.75275	0.643365	-0.185695	0.707261	0.837597
FBgn0004780	3R:6692731-6693527	Ccp84Ad	0	1.30135	2.44362	-0.378996	3.82356	0.0512096
FBgn0004781	3R:6695147-6696271	Ccp84Ac	0	0.489437	1.54165	-0.252774	1.39384	0.728057
FBgn0004782	3R:6701967-6702877	Ccp84Ab	0	0.553564	1.12746	-0.311267	#N/A	#N/A
FBgn0004783	3R:6704083-6704903	Ccp84Aa	1.54759	3.82219	4.0057	-0.402438	2.20956	0.570769
FBgn0004784	2R:16898534-16901575	inaC	0.134722	0	0	-0.639794	6.28476	0.213064
FBgn0004795	2R:23632609-23654820	retn	9.31116	3.99926	7.38616	-0.401306	1.9805	6.9443e-05
FBgn0004797	2L:16802025-16826964	mdy	3.93254	2.60574	9.25002	-0.960482	1.21933	0.354651
FBgn0004811	2L:19792103-19795851	fs(2)ltoPP43	101.448	65.3066	39.9834	2.65637	0.883844	0.254843
FBgn0004828	X:9152522-9156669	His3.3B	113.248	105.526	107.49	-0.87993	1.00844	0.957121
FBgn0004832	X:4101317-4104197	Xpac	68.1779	69.2581	47.8553	3.7439	1.19154	0.107591
FBgn0004837	2L:15039487-15043334	Su(H)	45.5806	17.7603	13.2365	-0.408003	0.833906	0.179863
FBgn0004838	2L:6920703-6932057	Hrb27C	139.965	124.502	116.61	-1.04147	0.932508	0.678709
FBgn0004839	2R:12001472-12019846	otk	3.29819	1.54356	1.48837	-0.345284	0.823356	0.56364
FBgn0004841	3R:10737591-10751228	TkR86C	2.10106	0.91254	1.64249	-0.701068	0.997971	0.995156
FBgn0004842	3R:26996979-27064199	RYa-R	0.49577	0.24775	0.380081	-0.501871	2.34466	0.0621524
FBgn0004852	3L:19939286-19977960	Ac76E	2.36046	2.1727	4.21743	-1.03283	1.44212	0.0296114
FBgn0004854	X:17314580-17324175	B-H2	7.88051	3.11129	0.339299	2.11661	1.11934	0.607498
FBgn0004855	3R:14309088-14310178	RpII15	79.9214	22.4637	17.7905	-0.319377	1.22837	0.139245
FBgn0004856	X:9103869-9106604	Bx42	56.676	11.5945	12.0601	-0.229259	1.07122	0.686453
FBgn0004858	2L:14390627-14409549	elB	7.7706	9.66392	9.83044	-1.22126	1.53428	0.0888454
FBgn0004859	4:47709-63124	ci	4.10922	3.17194	2.86992	-0.749856	1.60197	0.0308181
FBgn0004860	X:2115726-2123286	ph-d	2.62695	0.827522	1.27832	-0.956348	1.07976	0.766851
FBgn0004861	X:2126209-2138371	ph-p	1.45716	0.816319	1.27809	-0.704403	0.993872	0.985863
FBgn0004862	3R:21388879-21390449	bap	0	0.287245	0.288866	-0.561719	#N/A	#N/A
FBgn0004863	3R:21499985-21512814	C15	6.69164	10.4472	6.56839	0.544773	1.35999	0.199147
FBgn0004864	X:11360929-11368098	hop	37.0927	9.12402	7.04513	-0.54209	0.700128	0.0155752
FBgn0004865	3L:21226608-21266503	Eip78C	0.28463	0.35616	1.05951	-0.438421	1.91766	0.0218206
FBgn0004867	2L:9896264-9897552	RpS2	156.182	192.234	194.867	-0.825323	1.97879	9.40799e-09
FBgn0004868	2L:9491175-9494876	Gdi	123.339	90.2253	109.203	-0.490969	1.2152	0.085311
FBgn0004870	3L:1036368-1101089	bab1	1.84358	1.03709	1.12483	-0.641508	0.974082	0.923507
FBgn0004872	2L:10976771-10987420	piwi	14.4772	4.85811	3.94405	-0.27592	1.30099	0.0219206
FBgn0004875	3L:3818678-3842326	enc	71.9192	53.4062	38.015	-0.0836698	0.64765	0.0119796
FBgn0004876	3R:19044881-19094270	cdi	76.3295	98.4106	95.7172	2.67488	0.581395	4.04185e-05
FBgn0004878	3R:5712974-5716805	cas	0	0	0	-0.252925	0.46134	0.609938
FBgn0004880	3L:3983895-3994003	scrt	1.02649	1.3475	0.920123	-0.753534	0.993525	0.991127
FBgn0004882	3R:23260609-23280856	orb	165.818	240.366	248.333	2.12032	0.671294	0.0102401
FBgn0004885	3R:24719696-24749125	tok	11.0865	20.2473	19.5738	-0.706471	0.56605	2.11439e-07
FBgn0004888	3L:3814210-3818383	Scsalpha	39.8103	35.2884	67.532	-1.22292	2.08751	5.9061e-07
FBgn0004889	3R:10126128-10139772	tws	97.061	68.9697	55.2243	-0.392974	0.840827	0.12795
FBgn0004892	2L:3578012-3580769	sob	0.120375	0	0	-0.612069	0.742181	0.778119
FBgn0004893	2L:3771699-3784121	bowl	8.15764	6.51879	8.82101	-0.456983	3.00284	7.09981e-16
FBgn0004895	3L:4018877-4021279	FoxL1	0	0.973317	0.522938	4.90097	0.504454	0.012809
FBgn0004896	2R:22868158-22870706	fd59A	0.447317	0	0.484108	-0.65435	1.2369	0.812917
FBgn0004897	3R:25082683-25084878	fd96Ca	0.217352	0	0	-0.290659	#N/A	#N/A
FBgn0004898	3R:25095011-25096099	fd96Cb	0	0	0	-0.336011	#N/A	#N/A
FBgn0004901	3R:7903029-7911779	Prat	10.2699	4.23515	4.96437	-0.432085	1.10292	0.648289
FBgn0004903	3R:26872128-26875742	Rb97D	135.136	74.233	37.0154	1.34774	0.897667	0.595847
FBgn0004907	2R:10099676-10109687	14-3-3zeta	98.4305	86.9263	136.115	-1.69298	1.64014	1.92443e-05
FBgn0004908	3R:8341099-8343516	Arl2	116.05	119.309	120.494	4.5983	1.23753	0.0370822
FBgn0004910	3L:3909972-3935992	Eip63F-1	1.29099	2.15946	4.74069	-0.608181	0.827682	0.554776
FBgn0004911	3L:3909972-3935992	Eig63F-2	0.265867	0	0.568925	-0.252774	#N/A	#N/A
FBgn0004913	3R:4906621-4910081	Gnf1	87.3018	90.3073	76.1144	0.564554	0.662924	0.000110206
FBgn0004914	2L:8687225-8709611	Hnf4	9.61396	7.37327	12.4362	-1.95121	1.66152	0.00182144
FBgn0004915	2L:10431337-10435656	TfIIB	105.92	77.5792	31.8352	2.97497	0.825834	0.117994
FBgn0004919	2R:25072626-25084347	gol	13.377	18.0765	16.9658	-0.492476	0.648113	9.17808e-05
FBgn0004921	2R:8901403-8904791	Ggamma1	135.582	134.759	150.129	-0.990234	1.09461	0.385707
FBgn0004924	X:15319478-15328029	Top1	78.4003	80.0046	99.091	-0.507016	0.759346	0.0221506
FBgn0004926	3L:12521128-12526731	eIF2beta	152.824	194.286	210.626	1.212	1.02702	0.844432
FBgn0004956	X:18305353-18309291	upd1	20.9569	32.9711	29.2403	4.19779	0.775152	0.0362097
FBgn0004957	X:18366356-18379854	por	28.1451	18.569	14.9952	1.7193	0.817405	0.157044
FBgn0004959	X:18685765-18688433	phm	0	0	0	-0.270141	#N/A	#N/A
FBgn0005198	3L:20129180-20139010	gig	31.1159	9.76086	7.46563	-0.200901	0.737126	0.118474
FBgn0005278	2L:106902-114432	Sam-S	47.931	39.3419	35.2415	-1.04484	1.30643	0.108235
FBgn0005322	2L:10302172-10303947	nmd	89.9838	53.0428	32.4066	1.51059	1.10698	0.36532
FBgn0005355	3R:12689872-12691468	Su(fu)	61.1539	21.4734	17.8147	2.22023	0.988466	0.948365
FBgn0005386	3L:19590772-19598755	ash1	58.1218	44.0723	27.2845	-0.207336	0.613584	0.0101532
FBgn0005390	X:5955628-5964247	fs(1)M3	0.454101	0.290544	0	-0.303908	0.644197	0.0733214
FBgn0005391	X:10050950-10052636	Yp2	0.212382	0	0	-0.596305	1.95119	0.667942
FBgn0005411	X:16356695-16359039	U2af50	117.004	111.887	112.724	2.50733	1.21146	0.0479181
FBgn0005427	X:268508-470726	ewg	17.9915	3.79514	2.85463	-0.932472	0.93564	0.758591
FBgn0005533	3L:9428794-9429821	RpS17	149.481	165.047	210.827	-0.380354	1.91505	2.69954e-05
FBgn0005536	3L:16051958-16082026	Mbs	79.0721	73.8023	71.3297	-0.738304	0.866434	0.382735
FBgn0005558	4:697688-721173	ey	2.07761	0.550154	1.83491	-0.805806	0.653752	0.268206
FBgn0005561	4:1088797-1123357	sv	4.38251	3.20049	2.53938	-0.728468	1.34257	0.14537
FBgn0005564	3L:19566850-19584568	Shal	5.42827	4.6292	3.04825	-0.700006	1.88161	0.0030888
FBgn0005585	3R:9628690-9630851	Calr	143.373	142.663	204.449	-0.650285	3.04753	4.02108e-11
FBgn0005586	2R:10721334-10729203	Rab3	8.45718	5.8593	4.34949	-0.668746	0.861889	0.252369
FBgn0005590	2L:19586622-19732069	scw	0	0	0	na	1.35143	0.674642
FBgn0005592	3L:14071891-14083229	btl	0.174775	0.121292	0.584234	-1.2692	#N/A	#N/A
FBgn0005593	2L:10201003-10202321	RpL7	149.583	128.633	172.686	-1.0619	1.82966	3.1045e-05
FBgn0005596	3R:29116390-29122879	yem	51.0093	24.6516	15.3919	0.215194	0.708666	0.0218531
FBgn0005612	2R:23978800-23988455	Sox14	2.88807	3.61971	10.1324	-0.644223	1.56398	0.00607949
FBgn0005613	2R:14201389-14212413	Sox15	0.168829	0.652423	0.210407	-0.406355	0.971713	0.972772
FBgn0005614	2R:9753696-9765518	trpl	1.21216	1.66785	2.0732	-0.625524	1.34294	0.34336
FBgn0005616	2L:3462217-3466112	msl-2	17.724	7.47422	7.59748	-0.497188	0.965364	0.873753
FBgn0005617	2L:18683719-18688800	msl-1	17.7276	4.15637	2.67122	-0.476731	0.954053	0.844844
FBgn0005619	2R:10237743-10247560	Hdc	0.985422	1.23862	0.793648	-0.636707	1.92815	0.0442668
FBgn0005624	2R:12965996-12980994	Psc	3.04026	3.71745	3.14453	-0.764425	1.06	0.852102
FBgn0005626	3L:6713355-6719525	ple	2.73162	2.94114	9.42244	-0.291913	1.39393	0.151817
FBgn0005630	2R:10481893-10543291	lola	130.511	114.411	105.995	-0.797494	#N/A	#N/A
FBgn0005631	2R:22692523-22700970	robo1	26.6701	13.7801	11.1494	-0.496217	0.702952	0.0110843
FBgn0005632	3R:31777019-31793907	faf	30.7652	7.19226	9.50541	-1.36983	0.603528	0.00532518
FBgn0005633	3L:19989550-19991220	fln	0.576071	0.428289	0	-0.223248	#N/A	#N/A
FBgn0005636	2R:24275733-24291084	nvy	15.5087	30.6445	34.8727	0.839664	1.1051	0.579407
FBgn0005638	2R:24331521-24334307	slbo	0	0	0	-0.220963	6.66356	0.0886655
FBgn0005640	3L:3515750-3610521	Eip63E	46.5301	36.671	32.6846	-0.246332	0.595351	0.000653697
FBgn0005642	3R:28807982-28811337	wdn	53.7522	15.1213	7.55962	0.151371	1.16533	0.275302
FBgn0005648	2R:8131430-8135315	Pabp2	86.8906	63.4763	40.6366	0.00699392	1.01007	0.947418
FBgn0005649	3R:24043055-24049168	Rox8	80.001	42.5001	38.634	-0.846007	0.734947	0.00585808
FBgn0005654	2R:13202727-13206547	Orc3	29.7828	36.9538	20.9326	4.18583	#N/A	#N/A
FBgn0005655	2R:20261753-20262883	PCNA	87.3867	27.0511	11.3424	-0.171486	0.751726	0.0123964
FBgn0005658	3L:6097616-6123913	Ets65A	0	0.189802	0	-0.615234	1.0509	0.955455
FBgn0005659	3R:27736537-27748366	Ets98B	0.181839	0.134527	0.62561	-1.15991	0.83517	0.785715
FBgn0005660	2L:544924-552923	Ets21C	12.6101	7.31975	5.84355	1.78942	0.241448	1.76874e-19
FBgn0005664	2L:11944128-11947131	Crys	1.11857	0.428123	1.01	-0.509635	0.40044	0.0530382
FBgn0005666	4:724399-776474	bt	4.09709	5.81178	4.58785	-0.63773	1.32781	0.0808865
FBgn0005670	X:2159144-2162180	Cyp4d1	3.01246	2.62449	0	-0.321805	0.875006	0.721587
FBgn0005671	3R:12623761-12627829	Vha55	117.155	170	186.83	-0.661948	0.871669	0.1652
FBgn0005672	2L:19567899-19577315	spi	73.5803	51.667	56.9824	-0.438651	1.08828	0.512949
FBgn0005674	3R:23952135-23958391	GluProRS	44.38	11.9918	13.9288	-0.900004	0.904013	0.581255
FBgn0005677	2L:16466511-16485998	dac	11.7227	8.06376	5.26485	-0.324457	1.86728	1.2128e-09
FBgn0005683	2L:10420624-10422780	pie	42.5467	6.428	1.5472	0.289225	0.968346	0.853272
FBgn0005694	3L:21433421-21441363	Aef1	58.9053	18.0782	20.9098	-0.730428	0.799073	0.0935205
FBgn0005695	2R:8724257-8729501	gcl	15.7696	5.6963	4.70773	-0.432719	0.964022	0.86424
FBgn0005696	3R:27239162-27241228	DNApol-alpha73	16.6528	7.47426	6.47628	-0.230648	0.779519	0.17064
FBgn0005771	2L:14490858-14494019	noc	0.602533	2.91132	3.71728	-1.15335	1.17579	0.494925
FBgn0005775	3L:4936757-5079033	Con	1.02562	0.613227	0.481408	-0.544393	2.04138	0.035224
FBgn0005777	3R:9747874-9754686	PpD3	94.315	79.8792	72.2171	-0.077892	1.06473	0.607854
FBgn0005778	2R:22041666-22042945	PpD5	98.2308	109.664	58.3288	4.41402	0.921589	0.459341
FBgn0005779	2L:3068344-3144786	PpD6	77.4276	99.323	87.5424	4.84303	0.85222	0.308746
FBgn0008635	X:18381548-18385242	betaCOP	60.7307	25.0089	39.4966	0.0578828	1.95002	1.41003e-05
FBgn0008636	2R:20954667-20960909	hbn	1.51597	2.87416	2.19629	-0.521114	14.4838	4.03611e-05
FBgn0008646	3R:13867344-13874916	E5	2.33801	2.72363	3.11749	-0.344694	0.947911	0.860686
FBgn0008651	3R:21409978-21434133	lbl	0.203834	0.22495	0	-0.6841	0.574755	0.541797
FBgn0010014	X:5332498-5334449	CanB	9.87763	3.58821	1.42004	-0.757765	0.997184	0.997735
FBgn0010015	3R:31039373-31046821	CanA1	2.43469	0.917661	1.04413	-0.436027	0.509469	0.0898505
FBgn0010019	X:268508-470726	Cyp4g1	1.25392	3.86821	0.17423	-0.269425	1.0594	0.983446
FBgn0010038	3R:12371970-12372704	GstD2	3.92707	6.47475	14.6962	-0.17559	0.551051	0.0251528
FBgn0010039	3R:12373067-12373813	GstD3	71.9546	139.997	198.076	0.316743	0.729803	0.0654617
FBgn0010040	3R:12374099-12374824	GstD4	0.600826	0.786079	1.35618	0.0714532	0.391765	0.102211
FBgn0010041	3R:12375732-12376572	GstD5	56.6763	79.1917	115.331	0.573937	7.34586	1.87073e-67
FBgn0010042	3R:12377127-12377907	GstD6	0.962978	0.714937	1.23025	-0.253881	1.63391	0.26186
FBgn0010043	3R:12378499-12379255	GstD7	1.63915	3.60466	7.7166	-0.401519	1.41232	0.240316
FBgn0010044	3R:12380007-12380815	GstD8	0	0	0	-0.336337	1.27032	0.897763
FBgn0010051	3R:5508841-5539411	Itp-r83A	1.4263	1.14985	3.19015	-2.01404	1.17937	0.527144
FBgn0010052	2R:16119792-16122773	Jhe	0.163207	2.30724	15.1319	-0.249685	80.2559	3.40908e-24
FBgn0010053	2R:18853433-18855087	Jheh1	12.1014	9.14838	42.4923	-0.486551	#N/A	#N/A
FBgn0010078	2R:22854382-22858794	RpL23	151.076	155.494	240.54	-0.432953	2.0383	9.85108e-06
FBgn0010097	2L:19183862-19185726	gammaTub37C	2.23269	1.13787	0	-0.301366	1.03247	0.945576
FBgn0010100	2L:21163640-21173185	Acon	47.2882	29.7011	41.6288	-0.864739	1.50317	0.00111684
FBgn0010105	3L:15721510-15728430	comm	7.235	4.21233	2.47319	-0.732348	0.562916	0.00364193
FBgn0010109	2R:8228970-8232330	dpn	0	0	0	-0.340025	#N/A	#N/A
FBgn0010113	3R:30277931-30372382	hdc	40.8109	40.0495	43.5893	-0.362998	0.566553	8.58747e-06
FBgn0010114	2R:9227784-9247249	hig	1.77601	2.8903	1.56384	-0.72622	1.299	0.292346
FBgn0010173	3R:8262119-8264451	RpA-70	76.8604	64.7768	46.1913	-0.0623296	0.948916	0.766332
FBgn0010194	X:18501400-18505405	Wnt5	16.0199	5.4851	2.98975	-0.445827	1.05702	0.824802
FBgn0010197	2L:11138758-11149101	Gyc32E	1.208	1.55513	0.734044	-0.393043	0.974933	0.95723
FBgn0010198	X:13335636-13337705	RpS15Aa	127.426	119.996	162.286	-1.29105	2.70277	1.6832e-09
FBgn0010213	2R:16772784-16773915	Sod2	141.9	167.818	172.542	3.09733	0.877944	0.256129
FBgn0010215	3L:23318645-23338100	alpha-Cat	65.8484	39.5091	50.9986	-1.17121	0.775886	0.0144142
FBgn0010217	4:1029710-1034917	ATPsynbeta	112.094	101.626	142.951	-0.981686	1.68148	2.95757e-05
FBgn0010220	2R:9087833-9094658	Dbp45A	50.0269	11.6345	6.2744	0.270282	0.657096	0.00167916
FBgn0010222	3R:9042507-9052231	Nmdmc	37.7239	42.4282	46.6986	-0.432561	1.05739	0.691203
FBgn0010223	3L:16662556-16667934	Galphaf	7.52821	4.24585	3.81222	-0.303955	0.840349	0.587249
FBgn0010225	3R:4235216-4242717	Gel	22.1503	24.2223	29.268	-0.888416	1.08589	0.606015
FBgn0010226	2R:17093245-17099501	GstS1	183.6	240.191	276.672	4.79817	1.23716	0.121962
FBgn0010228	2R:21697487-21716727	HmgZ	22.6279	29.134	38.7819	-1.26407	1.93286	1.54195e-06
FBgn0010235	3L:12745343-12750056	Klc	73.2324	47.5733	52.5659	-0.778038	1.06522	0.655902
FBgn0010238	2R:12453189-12465630	Lac	20.395	34.4014	76.6217	-0.518225	0.968131	0.855382
FBgn0010240	X:15925104-15933867	Lcch3	1.60629	0.383037	0	-0.600128	0.442344	0.00920977
FBgn0010241	2R:14246965-14252597	Mdr50	0.306744	0.409064	0.769526	-0.437884	2.88139	0.0232586
FBgn0010246	3L:1318479-1329617	Myo61F	4.26104	9.78577	44.3631	-0.307092	1.04026	0.839519
FBgn0010247	3R:3461350-3587054	Parp	88.1984	34.8157	28.7736	-0.243236	0.640139	0.000184229
FBgn0010258	3R:13654555-13656394	Rbp4	129.503	34.6102	12.1158	3.30285	0.825245	0.173756
FBgn0010263	2L:2954761-2969638	Rbp9	39.3477	33.9764	74.7528	-0.482798	0.61782	2.18502e-05
FBgn0010265	2L:8363476-8364662	RpS13	160.803	192.27	221.794	-1.00971	1.60133	0.000545781
FBgn0010269	X:9247341-9250037	Dsor1	10.8786	5.47114	10.0941	-0.764776	1.50708	0.0113964
FBgn0010278	2R:23806360-23809004	Ssrp	98.3642	16.9935	9.80333	0.13748	0.821216	0.249631
FBgn0010280	3L:16113211-16121651	Taf4	77.8819	80.1965	83.6489	0.335504	0.784634	0.112281
FBgn0010282	3R:6380466-6382604	TfIIFalpha	110.331	84.8611	63.4131	0.717992	1.17138	0.290904
FBgn0010287	2L:8072894-8073948	Trf	76.2506	63.3777	37.7388	4.25651	1.10945	0.355355
FBgn0010288	2L:2212737-2214211	Uch	147.025	219.358	254.204	1.98349	0.897256	0.360291
FBgn0010292	X:7901879-7903643	bys	42.6642	18.5789	19.8983	0.0308575	0.96842	0.841241
FBgn0010294	X:3176439-3348400	ng2	0	0	0	-0.202617	#N/A	#N/A
FBgn0010295	X:3176439-3348400	ng3	0	0	0	-0.21307	1.01698	0.992376
FBgn0010296	X:3176439-3348400	ng4	0	0	0	na	#N/A	#N/A
FBgn0010300	2L:19132322-19181702	brat	25.6401	7.46894	6.63363	-0.535947	0.96568	0.893968
FBgn0010303	X:13079204-13090434	hep	12.4429	2.8424	4.63867	-1.66855	0.964282	0.888978
FBgn0010309	2L:19186042-19189938	pigeon	69.1997	66.103	46.7178	4.20365	0.570438	2.16418e-05
FBgn0010313	3R:5077778-5087072	corto	3.87543	5.57793	5.127	-1.28599	1.02522	0.910347
FBgn0010314	2L:9330762-9331981	Cks30A	55.9433	35.2976	18.4717	-0.165665	1.14741	0.342581
FBgn0010315	X:15906821-15909676	CycD	4.53516	3.2363	6.61962	-0.503389	1.45501	0.045914
FBgn0010316	2R:9712320-9716256	dap	32.7897	10.693	3.50994	-0.318368	1.13868	0.586932
FBgn0010317	3L:3466427-3471309	CycJ	16.9221	3.53083	1.90136	-0.231152	0.611523	0.0151195
FBgn0010323	2L:583539-594685	Gsc	8.06989	3.81284	3.92245	-0.333775	0.637707	0.0658279
FBgn0010328	3R:27256594-27264055	woc	46.5098	14.4079	10.1482	-0.537776	0.925789	0.651942
FBgn0010329	X:7995696-8027394	Tbh	1.96302	6.31857	4.27223	-0.585367	0.420504	1.13944e-05
FBgn0010333	3L:1300878-1302683	Rac1	62.6666	44.341	49.5173	-0.50845	1.40148	0.00638533
FBgn0010339	2R:12037297-12038851	128up	116.587	83.1738	63.1656	2.53752	1.08858	0.456022
FBgn0010340	3R:14122653-14125548	140up	45.8005	18.4956	8.93244	0.680394	0.957732	0.8039
FBgn0010341	X:19697090-19701755	Cdc42	39.9984	42.5429	61.4875	-1.12488	1.34772	0.0340118
FBgn0010342	2R:9587192-9605624	Map60	30.1195	7.09802	5.4312	-0.515789	1.13644	0.406062
FBgn0010348	3L:22868379-22878984	Arf79F	124.189	90.9033	131.785	-1.63554	1.94494	8.42481e-06
FBgn0010350	3L:8125326-8137498	CdsA	75.2603	93.0701	89.1297	-0.374576	0.741874	0.000602637
FBgn0010352	3L:16939099-16968724	Nc73EF	66.5064	50.4979	57.6747	-0.832547	0.856978	0.323278
FBgn0010355	3R:6646888-6657442	Taf1	44.2404	18.616	12.0198	0.0879414	0.695965	0.0506102
FBgn0010356	2R:10877311-10879673	Taf5	11.4375	2.65446	2.03357	-0.673692	1.42802	0.0486827
FBgn0010357	2R:11346324-11347395	betaTry	0	0	13.6836	-0.354406	#N/A	#N/A
FBgn0010358	2R:11355318-11356600	deltaTry	0	0	1.96396	-0.260275	#N/A	#N/A
FBgn0010359	2R:11349060-11349870	gammaTry	0	0	0	na	#N/A	#N/A
FBgn0010379	3R:16099227-16105670	Akt1	50.452	40.0479	38.2913	-0.957512	0.977849	0.877038
FBgn0010380	X:19731003-19734581	AP-1-2beta	37.9731	19.8553	29.4943	-1.05577	1.03284	0.839573
FBgn0010381	3L:3369555-3369942	Drs	1.53996	3.71698	1.82354	-0.566255	#N/A	#N/A
FBgn0010382	2L:15727580-15748324	CycE	32.7148	26.0948	10.6857	-0.0155852	0.592354	5.09728e-06
FBgn0010383	X:18688537-18693042	Cyp18a1	0.328165	0	0.543449	-1.04149	0.929254	0.921902
FBgn0010385	2R:10052540-10066514	Def	0	0	0	-0.605569	1.25469	0.877309
FBgn0010387	3L:7131862-7133463	Dbi	40.6641	80.8436	108.766	-0.115497	1.25531	0.338424
FBgn0010388	2R:14745960-14746714	Dro	1.8052	1.98753	6.7549	-0.549339	#N/A	#N/A
FBgn0010389	3R:18045215-18052984	htl	8.65327	8.23607	7.10814	-1.38925	0.986875	0.961263
FBgn0010391	X:11126876-11129087	Gtp-bp	73.9747	36.0833	42.7636	1.20529	1.6135	0.00141748
FBgn0010395	2L:21053032-21071502	Itgbn	0.559217	0.781545	0.34251	-0.430693	1.42571	0.266713
FBgn0010397	2R:14526266-14587917	LamC	69.2873	15.3054	22.3406	0.131481	0.773216	0.0842066
FBgn0010398	2L:10517334-10519269	Lrr47	61.99	23.5829	9.96853	2.81578	0.735878	0.00690374
FBgn0010399	3R:5508841-5539411	Nmdar1	2.92801	2.73947	1.45232	-0.694781	1.70845	0.0042135
FBgn0010401	3R:7978958-7980322	Os-C	0.797385	0	2.07966	-0.658161	#N/A	#N/A
FBgn0010403	3R:5976176-5976817	Obp83b	7.2353	1.02762	2.141	-0.511775	0.670157	0.63142
FBgn0010406	3L:7970587-7974991	RNaseX25	44.9087	53.7629	44.4448	-0.11784	1.79069	1.30213e-06
FBgn0010407	2L:10251842-10255891	Ror	22.1967	12.3435	12.9812	-0.305995	0.50662	0.00685742
FBgn0010408	3L:9509792-9511531	RpS9	153.024	142.144	224.043	-0.466616	1.58724	0.00348117
FBgn0010409	2R:17546405-17547462	RpL18A	148.323	153.21	211.815	-1.08845	1.8469	3.33677e-05
FBgn0010411	2R:20263978-20264848	RpS18	170.278	189.354	233.685	-0.133052	1.77446	3.59929e-05
FBgn0010412	X:16637893-16639249	RpS19a	152.094	131.849	187.143	-0.754626	2.40175	9.34821e-09
FBgn0010414	2R:24404594-24411074	SerT	0.513513	0.243786	0.869387	-0.426363	0.921296	0.811088
FBgn0010415	2R:21389404-21481176	Sdc	66.967	43.3493	52.609	-0.831518	1.16359	0.423057
FBgn0010416	X:16388819-16391438	TH1	45.6933	21.5732	15.3921	-0.0440121	1.20136	0.121272
FBgn0010417	3L:19599087-19601382	Taf6	57.5549	20.6453	21.5392	0.8394	0.776665	0.016076
FBgn0010421	3R:10761147-10767804	TfIIFbeta	83.5317	49.6891	45.5011	0.484549	1.59785	4.7218e-07
FBgn0010422	2L:15058302-15060757	TfIIS	128.694	56.562	37.1836	1.77959	0.926851	0.641013
FBgn0010423	2R:11273844-11275286	TpnC47D	37.0679	60.0858	37.2251	0.0606413	2.50266	4.00915e-10
FBgn0010424	3L:17046062-17048390	TpnC73F	3.90831	3.12867	14.3764	-0.265258	4.23734	1.89754e-17
FBgn0010425	2R:11345236-11346066	epsilonTry	0	0	23.8061	-0.380629	#N/A	#N/A
FBgn0010431	3L:8405453-8422205	mtrm	27.3037	18.6886	14.1941	-0.260303	0.808617	0.175212
FBgn0010433	3R:8278051-8279274	ato	0	0	0	-0.437928	#N/A	#N/A
FBgn0010434	2R:19229062-19243751	cora	10.884	13.6449	25.6201	-1.59628	0.902779	0.672887
FBgn0010435	2R:24976455-24990489	emp	134.716	210.316	228.039	1.75457	0.689602	0.000793443
FBgn0010438	3R:16203370-16205250	mtSSB	22.4598	9.366	8.14856	-0.512028	0.912653	0.712535
FBgn0010441	3R:27251111-27256463	pll	9.54892	8.29197	10.0765	-0.444768	0.773072	0.0883025
FBgn0010452	3L:13114270-13118077	trn	5.2415	6.82955	3.93306	-0.617406	2.08287	2.68675e-05
FBgn0010453	2L:7255418-7277171	Wnt4	9.09744	5.85352	6.9834	-0.322826	1.38555	0.0661907
FBgn0010470	2R:21487166-21497929	Fkbp14	36.27	31.4912	60.2063	-0.86827	7.98802	8.02579e-23
FBgn0010473	2L:4283147-4323781	tutl	2.5284	1.27814	0.953762	-0.715169	4.39039	6.44133e-15
FBgn0010482	2R:6721100-6740672	l(2)01289	1.4511	4.05271	3.25545	-0.38792	0.607543	0.0354304
FBgn0010488	2R:12915993-12923734	NAT1	112.282	163.492	181.297	-0.70567	0.573057	0.000638863
FBgn0010497	2L:12027437-12034122	dmGlut	0.260488	0.651244	2.55534	-0.518653	2.59755	0.0415146
FBgn0010501	2R:23548238-23554712	Dcp-1	14.1299	8.42504	4.25606	-0.616391	0.831017	0.293977
FBgn0010504	2R:8136985-8156654	kermit	122.098	185.278	200.233	4.95461	0.823477	0.116329
FBgn0010516	2R:11688568-11690863	wal	75.5165	36.7215	50.5283	-0.796789	1.32634	0.0321699
FBgn0010520	2L:9895286-9896104	Bka	27.7298	19.371	19.3985	0.352057	1.04632	0.835025
FBgn0010531	2R:10121485-10122574	Ccs	10.6935	3.85788	5.56685	-0.910149	1.41855	0.064265
FBgn0010548	2R:7466878-7477162	Aldh-III	41.3369	60.5533	142.425	-0.0576134	0.893144	0.267359
FBgn0010549	2R:9390164-9395281	l(2)03659	9.90098	6.77566	6.17107	5.19947	1.80339	4.61258e-07
FBgn0010551	2R:18819466-18829699	Phb2	176.526	231.74	258.327	3.614	0.890615	0.299435
FBgn0010575	2R:18277438-18357296	sbb	41.544	22.4	22.7661	-0.841253	#N/A	#N/A
FBgn0010583	2L:825968-833241	dock	71.1922	70.0838	57.0307	0.608838	1.04621	0.715983
FBgn0010590	2R:16008338-16014787	Prosbeta1	165.937	236.645	212.708	2.33573	0.945865	0.666647
FBgn0010591	2R:17088440-17091958	Sply	12.6739	16.532	31.165	-0.480059	0.86504	0.393242
FBgn0010602	2L:540598-542580	lwr	121.213	83.4677	61.1357	-0.0325675	1.42798	0.000512168
FBgn0010607	2L:4969003-4973921	l(2)05714	61.6869	27.082	15.2149	-0.249653	1.33094	0.0397424
FBgn0010611	2R:16324812-16341242	Hmgs	47.8582	34.4183	47.816	0.155742	0.908463	0.57987
FBgn0010612	2L:10975521-10976399	ATPsynG	155.321	195.08	228.628	0.111667	1.02287	0.901404
FBgn0010620	2R:17394592-17405171	CG10939	19.0304	19.4674	23.9368	-0.630139	2.16156	9.96438e-06
FBgn0010621	2R:12174801-12178553	CCT5	127.637	47.6386	48.5906	0.702328	0.769024	0.0789208
FBgn0010622	2R:23055473-23062593	DCTN3-p24	22.4894	8.36511	8.17333	-0.761503	1.45889	0.0216716
FBgn0010638	2R:14618770-14619681	Sec61beta	143.238	170.305	172.31	0.553895	1.63531	3.6368e-05
FBgn0010651	2R:18796974-18803727	MFS14	5.34551	7.01611	30.0101	-0.764205	1.63031	0.00072808
FBgn0010660	2R:22918936-22924742	Nup214	69.1659	26.9465	15.9725	0.228438	0.596334	0.00043255
FBgn0010741	3L:11070525-11074388	Pfdn2	98.7232	31.8767	24.5031	-0.0596466	1.08233	0.670321
FBgn0010747	3L:5152677-5154777	Srp54k	131.905	151.069	151.233	1.20199	1.13005	0.255033
FBgn0010750	3R:4750034-4777490	atms	67.0599	47.7637	39.0117	2.54571	0.592508	3.01294e-07
FBgn0010762	3L:10664738-10690734	simj	52.6482	38.1298	28.2917	-0.493725	1.30238	0.0553087
FBgn0010768	3R:19164210-19170576	sqz	1.89642	1.09229	1.08559	-0.86795	0.937432	0.870711
FBgn0010770	3R:21116253-21118856	ppan	26.2278	7.65025	7.07101	-0.185237	0.696669	0.0197488
FBgn0010772	3R:5660634-5669334	Xe7	31.6096	11.7068	13.5849	-1.38424	1.18888	0.168182
FBgn0010774	3R:7074775-7080387	Ref1	134.927	70.6151	56.4783	1.05442	1.14026	0.188243
FBgn0010786	3L:1333238-1339415	l(3)02640	71.9014	60.2146	52.7413	0.0500507	1.35395	0.00154855
FBgn0010803	3R:9265026-9266904	TrpRS	108.088	115.012	119.093	3.48336	0.850623	0.117197
FBgn0010808	3R:31052615-31053915	Chchd3	67.7839	18.9895	34.2177	-0.777252	1.53941	0.00478729
FBgn0010812	3R:8033300-8037403	unc-45	47.2885	15.8478	16.2298	-0.30354	0.906444	0.48862
FBgn0010825	3L:8449921-8472669	Gug	27.3686	12.727	14.365	-0.685335	0.461426	2.55799e-05
FBgn0010830	3L:22738601-22741388	l(3)04053	28.1138	8.47553	4.40207	-0.240005	0.778162	0.171946
FBgn0010877	3R:18288865-18298879	l(3)05822	64.0994	59.6247	49.3443	0.410294	0.933558	0.57895
FBgn0010894	3L:5559469-5561598	sinu	10.8114	17.2672	30.9523	-0.514595	1.4035	0.0430957
FBgn0010905	3L:2505244-2554292	Spn	14.091	8.46178	9.21816	-0.892011	0.950147	0.844659
FBgn0010909	3L:2554846-2586540	msn	22.0086	11.6361	24.4858	-1.18064	0.841349	0.425531
FBgn0010926	3R:17534814-17539963	l(3)07882	18.7078	7.26354	8.07046	-0.477302	0.81749	0.201926
FBgn0011016	3L:16129616-16130983	SsRbeta	136.253	135.359	113.829	0.664681	1.49988	0.000519783
FBgn0011020	3R:7151366-7154219	Sas-4	20.9323	6.90695	8.52131	-0.143277	0.706783	0.00934104
FBgn0011202	2L:20758143-20768053	dia	12.7705	7.81797	15.3818	-0.945315	0.632786	0.00311748
FBgn0011204	3L:1502842-1523380	cue	46.3559	20.7658	28.6209	-0.419437	1.42468	0.0244189
FBgn0011205	3L:20384428-20393553	fbl	61.2627	58.9353	83.0942	-0.857046	0.810596	0.233514
FBgn0011206	3L:9097628-9134405	bol	172.786	250.863	255.983	2.91512	0.857616	0.248213
FBgn0011207	2L:9700809-9708883	pelo	104.232	62.3772	34.3472	0.991785	0.786577	0.0514441
FBgn0011211	2R:22799098-22802180	blw	159.641	121.21	149.703	-0.796664	1.10411	0.5583
FBgn0011217	3R:14732413-14741319	eff	156.555	229.425	243.194	0.752713	0.840373	0.0992049
FBgn0011224	3R:31846986-32015520	heph	169.966	163.153	135.909	0.259653	0.782465	0.0615992
FBgn0011225	3R:24252825-24271233	jar	116.443	191.101	216.462	3.23186	0.541638	1.35902e-05
FBgn0011227	2R:12756433-12757529	ox	187.204	230.657	290.515	1.04721	1.14887	0.311239
FBgn0011230	2L:8043470-8071624	poe	65.4026	88.1592	82.6781	-0.018092	0.46794	5.786e-07
FBgn0011232	2L:9431404-9435341	scat	15.6945	5.57312	9.10516	-0.47893	1.17201	0.335168
FBgn0011236	2R:23870272-23877442	ken	45.6404	24.7065	19.2014	0.430059	1.51675	4.30835e-05
FBgn0011239	2L:15292467-15294136	ms(2)35Ci	100.78	166.971	189.438	4.83418	0.823785	0.145211
FBgn0011241	2R:9863650-9875072	cbx	78.6043	88.4046	85.9655	1.5212	#N/A	#N/A
FBgn0011244	2L:728361-730564	Hsp60B	155.771	237.131	243.359	5.02995	0.714852	0.016074
FBgn0011259	2L:8542146-8672041	Sema1a	9.94704	6.64788	6.19077	-0.519097	0.452457	2.44344e-07
FBgn0011260	2R:16500177-16533459	Sema2a	9.67947	9.98923	14.2394	-0.769111	1.03755	0.866544
FBgn0011270	3R:12231644-12232729	Pglym87	166.313	239.936	242.471	5.16391	0.743038	0.0216609
FBgn0011272	2L:9967312-9968645	RpL13	162.698	111.818	193.924	-1.18286	1.94328	1.06022e-05
FBgn0011273	3R:25811910-25813134	Acam	22.1932	2.97849	12.9543	4.95299	#N/A	#N/A
FBgn0011274	2L:17410640-17433161	Dif	4.21382	2.84304	6.23173	-1.33164	1.71554	0.000489597
FBgn0011276	X:2680198-2681723	HLH3B	0.731828	0.584085	0.293756	-0.443067	0.994428	0.996497
FBgn0011277	X:4645126-4647414	HLH4C	0	0	0	-0.319811	#N/A	#N/A
FBgn0011278	3R:21441576-21446537	lbe	5.9492	11.2806	7.8168	4.22129	1.19232	0.357721
FBgn0011279	3L:12393803-12399322	Obp69a	9.79761	14.8021	3.70404	3.14564	1.01107	0.980545
FBgn0011280	X:20419612-20420979	Obp19d	0	0	0	-0.538837	#N/A	#N/A
FBgn0011281	3R:5972154-5975245	Obp83a	0.510234	0	0	-0.547855	3.02027	0.310864
FBgn0011282	3R:7249794-7251957	Obp84a	0.937588	1.49164	1.19335	-0.589793	#N/A	#N/A
FBgn0011283	2L:7496790-7497365	Obp28a	0	0	0	-0.426896	0.320264	0.371555
FBgn0011284	3L:13041755-13044234	RpS4	147.88	118.333	179.263	-1.2514	2.20725	5.85654e-07
FBgn0011286	2R:8860363-8888097	RyR	5.92241	4.44044	3.54896	-0.699623	1.15973	0.36853
FBgn0011288	3L:24074179-24299205	Snap25	1.3387	2.93306	2.9254	-0.655354	0.806456	0.402152
FBgn0011289	3R:27251111-27256463	TfIIA-L	103.93	85.6915	64.142	0.880863	1.10287	0.428331
FBgn0011290	3R:11678385-11679690	Taf12	24.362	15.0777	18.5645	-0.786433	1.60461	0.00224583
FBgn0011291	2L:9762423-9763262	Taf11	52.3621	39.0866	45.4368	1.17478	1.13562	0.392005
FBgn0011293	3L:17023122-17023741	a10	3.90006	1.10073	0	-0.522758	1.31086	0.6712
FBgn0011294	2L:1329160-1329993	a5	0	0	0	-0.4724	#N/A	#N/A
FBgn0011296	2R:23683376-23687980	l(2)efl	27.3502	60.8991	68.4982	-0.416359	0.823885	0.345773
FBgn0011297	2R:23705438-23709947	l(2)not	57.4562	36.4784	32.2868	3.40354	0.969053	0.833333
FBgn0011300	2R:8952338-8962796	babo	8.22244	4.99506	6.73941	-1.91526	1.13633	0.459423
FBgn0011305	2L:10261794-10263554	Rsf1	68.7676	46.5139	37.2786	-0.550383	1.24612	0.060659
FBgn0011327	3L:9475492-9476965	Uch-L5	150.48	228.211	230.682	3.25831	0.919267	0.554292
FBgn0011335	3L:12116100-12118055	vers	34.7717	5.72358	6.93257	-0.534321	1.55299	0.000124765
FBgn0011336	3R:25065790-25069637	Stt3B	102.249	61.2654	61.2444	0.0924838	1.57018	0.00709501
FBgn0011361	3L:1329948-1331631	ND-ACP	150.691	183.426	187.278	1.16587	0.985007	0.923488
FBgn0011455	3L:12136966-12138584	ND-SGDH	129.217	163.896	171.393	1.37485	1.05982	0.696801
FBgn0011474	3R:14316037-14326689	PR-Set7	27.9945	28.5425	22.3948	0.470441	0.552792	7.2498e-08
FBgn0011476	3R:15275521-15278668	l(3)neo43	86.4027	123.185	114.028	3.11834	2.14895	0.272872
FBgn0011481	3R:18192493-18199595	Ssdp	16.0548	3.78769	5.66907	-0.998212	1.22218	0.357011
FBgn0011509	3L:8718948-8720225	SrpRbeta	33.701	17.7801	23.2206	-0.927441	2.67212	1.27439e-08
FBgn0011554	2R:11340512-11341423	etaTry	0	0	0	-0.140124	#N/A	#N/A
FBgn0011555	2R:11341713-11342760	thetaTry	0.714879	0.419014	10.0345	-0.331773	19.0144	0.0726887
FBgn0011556	2R:11339185-11340132	zetaTry	0	0	0	-0.00829882	#N/A	#N/A
FBgn0011559	2L:18320101-18393441	Acp36DE	94.7546	58.3107	23.7973	-0.0887808	13.9821	7.37169e-09
FBgn0011566	X:2604196-2608876	Smyd3	11.6392	2.16184	2.73693	-0.4314	1.00078	0.998043
FBgn0011569	3L:10263908-10267111	can	66.884	35.6362	30.4972	1.39777	0.719281	0.00475565
FBgn0011570	2L:1704901-1706962	cpb	49.9832	20.3953	36.5114	-0.653977	1.19019	0.233187
FBgn0011571	X:16288809-16293520	caz	59.9517	15.3179	17.8296	-1.03882	#N/A	#N/A
FBgn0011573	3L:1795391-1798610	Cdc37	124.559	146.3	150.217	2.37309	0.93896	0.636209
FBgn0011576	X:2172525-2180998	Cyp4d2	4.89746	4.61335	10.2499	0.0158837	#N/A	#N/A
FBgn0011581	3R:24341550-24343825	Ms	1.64543	1.67866	0	-0.520848	26.3013	3.56615e-11
FBgn0011582	3R:14165378-14214810	Dop1R1	0.613856	0.835263	0.553808	-0.596583	0.537159	0.000178967
FBgn0011584	2L:10009380-10013170	Trp1	92.5273	71.203	95.8405	-0.240785	3.04948	9.43238e-11
FBgn0011586	X:8904143-8906248	e(r)	107.562	40.3872	38.158	-0.697015	1.09526	0.581716
FBgn0011589	2R:17873938-17926695	Elk	0.726546	1.84595	1.33588	-0.794145	2.10869	0.000734419
FBgn0011591	3L:20925890-20949512	fng	2.49619	2.7667	10.2086	-0.843827	1.76776	0.000389195
FBgn0011592	2R:12529052-12564184	fra	28.7103	21.6454	18.5265	-0.434882	1.11912	0.294884
FBgn0011596	3R:23168316-23226711	fzo	130.767	160.906	89.1052	2.10503	0.926679	0.551462
FBgn0011603	2L:4465173-4477022	ine	0.338077	0.788415	2.5411	-0.968753	1.49558	0.0957779
FBgn0011604	2R:12636670-12640628	Iswi	114.566	104.015	73.3036	0.415189	0.857615	0.301416
FBgn0011606	X:2599157-2604052	Klp3A	107.129	158.146	172.454	3.06832	0.641671	0.000865279
FBgn0011638	2L:20348392-20350012	La	114.077	51.2855	44.684	0.736314	0.83675	0.154132
FBgn0011640	3L:7335441-7345183	lark	91.2905	45.3191	32.0548	-0.659422	1.13152	0.432677
FBgn0011642	4:1057364-1077273	Zyx	72.455	30.149	25.4802	-1.13498	1.15678	0.19071
FBgn0011648	2L:3146055-3159643	Mad	56.5134	34.6386	29.6011	-0.163989	0.800921	0.0566566
FBgn0011653	3L:4161665-4167464	mas	0.432716	0.900827	0.105067	-0.47167	1.93966	0.288601
FBgn0011655	3R:31596641-31616160	Med	28.5594	6.60925	8.3171	-0.868842	0.779689	0.145938
FBgn0011656	2R:9913495-9958858	Mef2	12.9061	5.01007	4.72723	-1.36178	1.01344	0.954241
FBgn0011659	2R:8170273-8173613	Mlh1	11.7147	17.7416	9.44793	0.240009	0.295932	4.76954e-15
FBgn0011660	2R:15340471-15371520	Pms2	60.0386	27.7906	11.6101	0.814802	0.798439	0.0578248
FBgn0011661	X:8873011-8898332	Moe	46.5597	28.8155	79.1384	-1.60766	1.51203	0.00790694
FBgn0011666	3R:25516117-25609127	msi	44.8799	12.9645	9.41248	-0.896081	0.736479	0.0255618
FBgn0011668	3R:25831574-25831899	Mst57Da	163.671	195.548	90.7498	0.170674	27.1598	2.77418e-13
FBgn0011669	3R:25830719-25830914	Mst57Db	214.19	248.288	218.68	0.164479	33.3616	8.27488e-12
FBgn0011670	3R:25829320-25829698	Mst57Dc	90.803	102.186	53.7357	0.134499	24.2209	6.6724e-14
FBgn0011672	3R:21051382-21060800	Mvl	45.0587	39.5354	39.2483	-0.967606	0.831084	0.15255
FBgn0011674	2R:20821261-20836028	insc	3.46722	1.84503	3.10807	-0.701957	1.42951	0.1383
FBgn0011676	2L:10804273-10837511	Nos	0	0.113506	0	-0.684356	1.73286	0.118691
FBgn0011692	3L:4242733-4246233	pav	30.0842	7.28372	2.48337	-0.173901	0.760661	0.0806925
FBgn0011693	3L:16351990-16354297	Pdh	0.825617	0.988814	14.1378	-0.578158	4.02419	0.072516
FBgn0011694	2R:25173567-25174230	EbpII	6.39516	0	0	-0.197037	#N/A	#N/A
FBgn0011695	2R:24026171-24027518	EbpIII	48.6417	108.867	206.554	-0.63012	1.00473	0.987681
FBgn0011701	3R:18236191-18242159	repo	0	0	0.12974	-0.8095	5.08857	0.0430334
FBgn0011703	2L:10325025-10327943	RnrL	9.34963	2.45743	3.33234	-0.337339	0.618882	0.00996896
FBgn0011704	2R:11983144-11985393	RnrS	24.9562	18.6114	12.1963	-0.30226	0.824412	0.230275
FBgn0011705	2L:8985935-8989539	rost	21.9049	25.6567	24.2747	-0.51962	1.2648	0.139452
FBgn0011706	3L:18397534-18398435	rpr	0	0.596227	12.8462	-0.336551	1.10067	0.810194
FBgn0011708	2L:16307345-16309274	Syx5	105.903	103.564	101.966	0.0164173	1.19754	0.0687572
FBgn0011710	X:21358285-21361688	Sep1	49.22	38.8805	43.6564	-0.173518	0.831822	0.0873347
FBgn0011715	3R:5470925-5472754	Snr1	42.2386	21.3843	20.6373	-0.299233	1.14276	0.307158
FBgn0011722	2L:6412314-6423310	Tig	15.0672	9.66719	9.13534	-0.428554	0.540202	0.0266922
FBgn0011723	3L:11850644-11938872	byn	0.872084	2.03225	1.86181	-0.495535	0.61186	0.551678
FBgn0011725	3R:24196892-24226934	twin	173.158	252.412	270.778	4.2891	0.751755	0.0266548
FBgn0011726	2R:24037942-24046805	tsr	138.623	127.244	153.526	-0.497433	1.39167	0.00190395
FBgn0011737	2L:6908082-6914138	Wee1	111.293	138.491	130.252	3.52235	0.842744	0.0889617
FBgn0011739	3R:30789624-30806619	wts	23.2213	8.69981	7.45516	-1.25685	0.693348	0.0129969
FBgn0011740	3R:9412547-9417264	alpha-Man-IIa	55.9122	16.9427	13.045	-0.0333996	1.581	0.000978307
FBgn0011741	X:15734269-15737120	Arp6	20.4707	11.3398	15.6802	-0.640592	1.44484	0.0136438
FBgn0011742	X:16548289-16553968	Arp2	75.7933	95.2092	103.448	-0.708668	0.969259	0.842109
FBgn0011743	2R:16774245-16775676	Arp53D	138.375	174.952	175.528	4.72824	1.08689	0.404386
FBgn0011745	3R:12691732-12694842	Arp1	75.0525	66.0665	65.8478	0.669081	0.891277	0.326457
FBgn0011746	2R:9062294-9077554	ana	16.7165	44.9206	114.865	3.52218	0.331914	5.48084e-20
FBgn0011747	4:115073-129849	Ank	49.4971	28.8689	37.2933	-1.88441	0.918529	0.631728
FBgn0011754	X:11695136-11705300	PhKgamma	76.1497	38.9932	36.5783	0.066125	0.98106	0.909475
FBgn0011758	X:17397477-17403278	B-H1	0.130468	0	0	-0.872786	17.7302	0.104761
FBgn0011760	X:4687799-4702034	ctp	153.237	85.0782	89.761	-1.22112	1.23567	0.0577087
FBgn0011761	X:5312170-5313125	dhd	27.4036	13.0589	5.24565	-0.278527	1.02692	0.901417
FBgn0011762	3L:8340313-8344404	DNApol-alpha50	1.34415	0.262594	0.263771	-0.424099	0.988935	0.983509
FBgn0011763	2R:13220282-13228202	Dp	34.8947	12.2815	10.5222	-0.836641	1.30093	0.0979235
FBgn0011766	3R:21620303-21660871	E2f1	22.7653	11.1988	15.7847	-0.828137	1.34438	0.14513
FBgn0011768	3R:10870905-10872381	Fdh	109.143	61.0347	86.6522	0.763472	1.17275	0.156189
FBgn0011769	3L:9367376-9371238	Fdx1	44.8788	34.8486	36.6411	3.37774	1.14913	0.358653
FBgn0011770	X:10326463-10329872	Gip	39.6348	5.83422	12.7086	-0.682586	2.44926	4.11921e-05
FBgn0011771	3L:22284353-22288195	Hem	20.9047	5.44649	8.44761	-1.16811	0.940715	0.752975
FBgn0011774	3R:11410046-11412440	Irbp	24.3228	4.96747	2.04053	-0.11078	0.802503	0.239085
FBgn0011785	3R:24318815-24333316	BRWD3	27.0886	6.39793	6.29854	-0.455465	0.719311	0.0773252
FBgn0011787	3L:8956790-8957584	mRpL12	117.161	60.416	45.2909	1.21125	1.19435	0.209068
FBgn0011802	3L:10459080-10463101	Gem3	65.5644	51.1815	54.8115	-0.17126	0.777272	0.0458632
FBgn0011812	2R:8432885-8433384	Lcp1Psi	0	0	0	-0.185695	#N/A	#N/A
FBgn0011817	3L:7979045-8054147	nmo	133.179	161.904	159.871	0.539463	0.645678	0.00128437
FBgn0011818	2L:2492954-2498846	oaf	143.826	37.4554	13.278	1.84045	0.802552	0.0851787
FBgn0011822	X:268508-470726	pcl	0	0	1.10294	-0.382301	2.30183	0.614035
FBgn0011824	2R:21092221-21101453	CG4038	39.3322	7.69824	7.63364	-0.801248	1.70424	0.000573369
FBgn0011826	X:16554626-16560016	Pp2B-14D	9.17823	3.90222	6.046	-1.08442	1.48541	0.0311828
FBgn0011828	3L:2600330-2630693	Pxn	3.55084	5.8253	7.88034	-0.514317	1.11398	0.591349
FBgn0011829	2L:21179932-21198762	Ret	0.272797	0	0	-0.522897	1.54453	0.605651
FBgn0011832	2L:2250430-2251275	Ser12	0	0	0	na	#N/A	#N/A
FBgn0011834	X:20962604-20963505	Ser6	0	0	9.45798	-0.303512	1.27397	0.55201
FBgn0011836	3L:9878984-9888683	Taf2	43.8368	14.6595	9.86508	0.755678	0.733462	0.00869157
FBgn0011837	X:12659414-12682554	Tis11	61.8354	10.3491	13.6696	-1.34942	0.758271	0.0948205
FBgn0011840	3R:17620143-17620216	tRNA:Ala-AGC-2-3	0	0	0	na	#N/A	#N/A
FBgn0011844	3L:13228691-13279642	tRNA:Asp-GTC-1-10	0	0	0	na	#N/A	#N/A
FBgn0011845	3R:24544718-24556549	tRNA:Asp-GTC-1-11	0	0	0	na	#N/A	#N/A
FBgn0011848	2R:19727980-19728052	tRNA:Glu-TTC-1-6	0	0	0	na	#N/A	#N/A
FBgn0011849	2R:19727459-19727531	tRNA:Glu-TTC-1-5	0	0	0	na	#N/A	#N/A
FBgn0011850	2R:19726141-19726213	tRNA:Glu-TTC-1-4	0	0	0	na	#N/A	#N/A
FBgn0011851	3L:1342492-1475257	tRNA:Glu-CTC-3-4	0	0	0	na	#N/A	#N/A
FBgn0011852	3L:1342492-1475257	tRNA:Glu-CTC-3-5	0	0	0	na	#N/A	#N/A
FBgn0011853	3L:1342492-1475257	tRNA:Glu-CTC-3-6	0	0	0	na	#N/A	#N/A
FBgn0011854	3L:1342492-1475257	tRNA:Glu-CTC-3-8	0	0	0	na	#N/A	#N/A
FBgn0011855	3L:1342492-1475257	tRNA:Glu-CTC-3-9	0	0	0	na	#N/A	#N/A
FBgn0011858	3R:16310541-16341988	tRNA:Phe-GAA-1-8	0	0	0	na	#N/A	#N/A
FBgn0011859	2L:1884621-1944289	tRNA:Gly-GCC-1-1	0	0	0	na	#N/A	#N/A
FBgn0011860	2L:2031691-2031762	tRNA:Gly-GCC-1-2	0	0	0	na	#N/A	#N/A
FBgn0011861	2L:7872848-7872919	tRNA:Gly-GCC-1-3	0	0	0	na	#N/A	#N/A
FBgn0011862	2L:14518090-14518161	tRNA:Gly-GCC-1-4	0	0	0	-0.185695	#N/A	#N/A
FBgn0011863	2L:14518306-14518377	tRNA:Gly-GCC-1-5	0	0	0	na	#N/A	#N/A
FBgn0011864	2L:14518620-14518691	tRNA:Gly-GCC-1-6	0	0	0	na	#N/A	#N/A
FBgn0011865	2L:14530545-14530616	tRNA:Gly-GCC-1-7	0	0	0	na	#N/A	#N/A
FBgn0011866	2L:14530853-14530924	tRNA:Gly-GCC-2-1	0	0	0	na	#N/A	#N/A
FBgn0011867	2R:16968007-16968078	tRNA:Gly-GCC-1-8	0	0	0	na	#N/A	#N/A
FBgn0011868	2R:18639725-18639796	tRNA:Gly-GCC-1-9	0	0	0	na	#N/A	#N/A
FBgn0011869	2R:20229480-20229551	tRNA:Gly-GCC-1-10	0	0	0	na	#N/A	#N/A
FBgn0011870	2R:20231828-20234927	tRNA:Gly-GCC-1-11	0	0	0	na	#N/A	#N/A
FBgn0011871	2R:21161355-21161426	tRNA:Gly-GCC-1-12	0	0	0	na	#N/A	#N/A
FBgn0011872	2R:21182855-21182926	tRNA:Gly-GCC-1-13	0	0	0	-0.185695	#N/A	#N/A
FBgn0011877	2R:12336732-12336804	tRNA:His-GTG-2-1Psi	0	0	0	na	#N/A	#N/A
FBgn0011878	2R:12336417-12336489	tRNA:His-GTG-1-4	0	0	0	-0.267432	#N/A	#N/A
FBgn0011879	2R:17392214-17392286	tRNA:Ala-TGC-2-1	0	0	0	na	#N/A	#N/A
FBgn0011880	2R:6087872-6169087	tRNA:Ile-AAT-1-1	0	0	0	na	#N/A	#N/A
FBgn0011881	2R:13414977-13439051	tRNA:Ile-AAT-1-3	0	0	0	na	#N/A	#N/A
FBgn0011882	2R:13414977-13439051	tRNA:Ile-AAT-1-4	0	0	0	na	#N/A	#N/A
FBgn0011883	2R:13414977-13439051	tRNA:Ile-AAT-1-5	0	0	0	na	#N/A	#N/A
FBgn0011884	2R:13414977-13439051	tRNA:Ile-AAT-1-6	0	0	0	na	#N/A	#N/A
FBgn0011885	2R:13414977-13439051	tRNA:Ile-AAT-1-7	0	0	0	na	#N/A	#N/A
FBgn0011887	2R:6087872-6169087	tRNA:Lys-CTT-1-4	0	0	0	na	#N/A	#N/A
FBgn0011888	2R:6087872-6169087	tRNA:Lys-CTT-1-3	0	0	0	na	#N/A	#N/A
FBgn0011889	2R:6087872-6169087	tRNA:Lys-CTT-1-2	0	0	0	-0.185695	#N/A	#N/A
FBgn0011890	2R:6171495-6171568	tRNA:Lys-CTT-1-5	0	0	0	na	#N/A	#N/A
FBgn0011891	2R:6087872-6169087	tRNA:Lys-CTT-1-1	0	0	0	na	#N/A	#N/A
FBgn0011892	2R:6923365-6971637	tRNA:Lys-CTT-1-6	0	0	0	na	#N/A	#N/A
FBgn0011893	2R:6923365-6971637	tRNA:Lys-CTT-1-7	0	0	0	na	#N/A	#N/A
FBgn0011894	2R:6923365-6971637	tRNA:Lys-CTT-1-8	0	0	0	na	#N/A	#N/A
FBgn0011895	2R:6923365-6971637	tRNA:Lys-CTT-1-9	0	0	0	na	#N/A	#N/A
FBgn0011896	2R:13536044-13536117	tRNA:Lys-CTT-1-10	0	0	0	na	#N/A	#N/A
FBgn0011897	2R:19802590-19802663	tRNA:Lys-CTT-1-11	0	0	0	na	#N/A	#N/A
FBgn0011902	2L:8258372-8301079	tRNA:Lys-TTT-1-1	0	0	0	na	#N/A	#N/A
FBgn0011904	3R:6822962-6823035	tRNA:Lys-TTT-2-4	0	0	0	na	#N/A	#N/A
FBgn0011905	3R:12131355-12131427	tRNA:Lys-TTT-2-5	0	0	0	na	#N/A	#N/A
FBgn0011906	2R:8683214-8683297	tRNA:Leu-CAG-1-1	0	0	0	na	#N/A	#N/A
FBgn0011909	2R:13414977-13439051	tRNA:Leu-CAA-2-1	0	0	0	na	#N/A	#N/A
FBgn0011910	2R:13414977-13439051	tRNA:Leu-CAA-1-1	0	0	0	na	#N/A	#N/A
FBgn0011915	2R:11652648-11652721	tRNA:Met-CAT-1-1	0	0	0	na	#N/A	#N/A
FBgn0011916	2R:11652755-11679354	tRNA:Met-CAT-1-2	0	0	0	5.19947	#N/A	#N/A
FBgn0011919	3R:6496038-6496111	tRNA:Met-CAT-1-5	0	0	0	na	#N/A	#N/A
FBgn0011921	2R:9610463-9683858	tRNA:iMet-CAT-2-1	0	0	0	na	#N/A	#N/A
FBgn0011927	3L:14672838-14747868	tRNA:iMet-CAT-1-4	0	0	0	na	#N/A	#N/A
FBgn0011928	3L:14672838-14747868	tRNA:iMet-CAT-1-5	0	0	0	na	#N/A	#N/A
FBgn0011931	2R:6087872-6169087	tRNA:Asn-GTT-1-6	0	0	0	na	#N/A	#N/A
FBgn0011932	2R:6087872-6169087	tRNA:Asn-GTT-1-5	0	0	0	na	#N/A	#N/A
FBgn0011933	2R:6087872-6169087	tRNA:Asn-GTT-1-4	0	0	0	na	#N/A	#N/A
FBgn0011934	2R:6181747-6196320	tRNA:Asn-GTT-1-8	0	0	0	na	#N/A	#N/A
FBgn0011935	2R:6181747-6196320	tRNA:Asn-GTT-1-7	0	0	0	na	#N/A	#N/A
FBgn0011936	2R:6087872-6169087	tRNA:Asn-GTT-1-3	0	0	0	na	#N/A	#N/A
FBgn0011937	2R:6087872-6169087	tRNA:Asn-GTT-1-2	0	0	0	na	#N/A	#N/A
FBgn0011938	2R:6087872-6169087	tRNA:Asn-GTT-1-1	0	0	0	na	#N/A	#N/A
FBgn0011944	3R:17618109-17618181	tRNA:Pro-TGG-1-1	0	0	0	na	#N/A	#N/A
FBgn0011945	3R:17619960-17620032	tRNA:Pro-TGG-1-2	0	0	0	na	#N/A	#N/A
FBgn0011948	X:14016202-14016275	tRNA:Arg-TCG-3-1	0	0	0	na	#N/A	#N/A
FBgn0011949	X:14016807-14016880	tRNA:Arg-TCG-3-2	0	0	0	na	#N/A	#N/A
FBgn0011950	X:14017009-14017082	tRNA:Arg-TCG-3-3	0	0	0	na	#N/A	#N/A
FBgn0011951	X:14017211-14017284	tRNA:Arg-TCG-3-4	0	0	0	na	#N/A	#N/A
FBgn0011952	X:14014813-14014886	tRNA:Arg-TCG-2-1	0	0	0	na	#N/A	#N/A
FBgn0011953	X:14103718-14103791	tRNA:Arg-TCG-1-1	0	0	0	na	#N/A	#N/A
FBgn0011954	X:21205309-21281171	tRNA:Arg-TCG-2-2	0	0	0	na	#N/A	#N/A
FBgn0011955	2R:6178583-6178656	tRNA:Arg-ACG-1-5	0	0	0	na	#N/A	#N/A
FBgn0011956	2R:6169606-6169679	tRNA:Arg-ACG-1-3	0	0	0	na	#N/A	#N/A
FBgn0011957	2R:6087872-6169087	tRNA:Arg-ACG-1-2	0	0	0	na	#N/A	#N/A
FBgn0011958	2R:6087872-6169087	tRNA:Arg-ACG-1-1	0	0	0	na	#N/A	#N/A
FBgn0011959	3R:8140969-8141042	tRNA:Arg-ACG-1-10	0	0	0	na	#N/A	#N/A
FBgn0011960	3R:8140726-8140799	tRNA:Arg-ACG-1-9	0	0	0	na	#N/A	#N/A
FBgn0011961	3R:8140475-8140548	tRNA:Arg-ACG-1-8	0	0	0	na	#N/A	#N/A
FBgn0011962	3R:8140222-8140295	tRNA:Arg-ACG-1-7	0	0	0	na	#N/A	#N/A
FBgn0011963	3R:8139950-8140023	tRNA:Arg-ACG-1-6	0	0	0	na	#N/A	#N/A
FBgn0011965	3R:5378092-5392866	tRNA:Arg-TCG-4-1	0	0	0	na	#N/A	#N/A
FBgn0011966	3R:8824410-8931896	tRNA:Arg-TCG-2-3	0	0	0	na	#N/A	#N/A
FBgn0011970	3R:10264305-10311613	tRNA:Ser-GCT-2-1	0	0	0	na	#N/A	#N/A
FBgn0011971	3R:14044524-14044606	tRNA:Ser-GCT-2-2	0	0	0	na	#N/A	#N/A
FBgn0011974	X:14070640-14070722	tRNA:Ser-AGA-1-1	0	0	0	na	#N/A	#N/A
FBgn0011975	X:14015044-14015126	tRNA:Ser-CGA-1-1	0	0	0	na	#N/A	#N/A
FBgn0011976	X:14015444-14015526	tRNA:Ser-CGA-1-2	0	0	0	na	#N/A	#N/A
FBgn0011977	X:14103362-14103444	tRNA:Ser-CGA-1-3	0	0	0	na	#N/A	#N/A
FBgn0011980	X:14025108-14025190	tRNA:Ser-AGA-3-1	0	0	0	na	#N/A	#N/A
FBgn0011981	X:14104648-14104730	tRNA:Ser-AGA-3-2	0	0	0	na	#N/A	#N/A
FBgn0011982	X:14025565-14025647	tRNA:Ser-AGA-2-1	0	0	0	na	#N/A	#N/A
FBgn0011983	X:14117728-14117810	tRNA:Ser-AGA-2-2	0	0	0	na	#N/A	#N/A
FBgn0011984	2L:3173002-3173084	tRNA:Ser-AGA-2-4	0	0	0	na	#N/A	#N/A
FBgn0011985	2L:3169581-3169663	tRNA:Ser-AGA-2-3	0	0	0	na	#N/A	#N/A
FBgn0011986	3L:5342083-5342165	tRNA:Ser-AGA-2-5	0	0	0	na	#N/A	#N/A
FBgn0011987	2R:11357563-11357650	tRNA:SeC-TCA-1-1	0	0	0	na	#N/A	#N/A
FBgn0011993	3R:17624564-17624638	tRNA:Thr-AGT-1-5	0	0	0	na	#N/A	#N/A
FBgn0011994	3R:17624805-17624879	tRNA:Thr-AGT-1-6	0	0	0	na	#N/A	#N/A
FBgn0011998	3R:7452059-7452132	tRNA:Val-CAC-2-2	0	0	0	na	#N/A	#N/A
FBgn0011999	3R:7451296-7451369	tRNA:Val-CAC-2-1	0	0	0	na	#N/A	#N/A
FBgn0012000	3R:7472059-7472132	tRNA:Val-CAC-2-3	0	0	0	na	#N/A	#N/A
FBgn0012001	3R:7475902-7475975	tRNA:Val-CAC-2-4	0	0	0	na	#N/A	#N/A
FBgn0012002	3R:17617760-17617833	tRNA:Val-CAC-1-1	0	0	0	na	#N/A	#N/A
FBgn0012003	3R:19671449-19698742	tRNA:Val-CAC-2-5	0	0	0	na	#N/A	#N/A
FBgn0012004	3R:19790121-19790194	tRNA:Val-CAC-2-6	0	0	0	na	#N/A	#N/A
FBgn0012009	3L:13428838-13435229	tRNA:Val-AAC-2-4	0	0	0	-0.393043	#N/A	#N/A
FBgn0012010	3L:13428838-13435229	tRNA:Val-AAC-2-3	0	0	0	na	#N/A	#N/A
FBgn0012011	3R:16310541-16341988	tRNA:Val-AAC-1-1	0	0	0	na	#N/A	#N/A
FBgn0012016	2L:2462592-2462686	tRNA:Tyr-GTA-1-3	0	0	0	na	#N/A	#N/A
FBgn0012017	2L:2459923-2460044	tRNA:Tyr-GTA-1-2	0	0	0	na	#N/A	#N/A
FBgn0012018	2L:7710879-7713991	tRNA:Tyr-GTA-3-1	0	0	0	na	#N/A	#N/A
FBgn0012024	3R:8660902-8673702	tRNA:Tyr-GTA-1-8	0	0	0	na	#N/A	#N/A
FBgn0012025	3R:8660902-8673702	tRNA:Tyr-GTA-1-7	0	0	0	na	#N/A	#N/A
FBgn0012026	3R:8660902-8673702	tRNA:Tyr-GTA-1-6	0	0	0	na	0.34489	0.407578
FBgn0012027	3R:8642700-8642793	tRNA:Tyr-GTA-1-5	0	0	0	-0.185695	#N/A	#N/A
FBgn0012028	3R:8642332-8642425	tRNA:Tyr-GTA-1-4	0	0	0	na	#N/A	#N/A
FBgn0012034	3L:21270721-21280243	AcCoAS	5.50181	2.73668	7.07945	-0.883227	1.31899	0.0673452
FBgn0012036	2L:9370308-9415156	Aldh	150.587	227.074	231.608	3.36768	0.750772	0.0126795
FBgn0012037	2L:13905644-13909212	Ance	90.4844	154.488	164.084	0.492237	0.594602	2.45778e-07
FBgn0012042	2R:14747361-14748215	AttA	0.537712	2.37157	1.61855	-0.46491	0.722806	0.901075
FBgn0012051	2R:19425112-19430564	CalpA	30.8478	14.3919	16.8561	-0.814583	0.754432	0.0440088
FBgn0012058	3L:7245480-7249340	Cdc27	117.031	132.38	135.582	3.45965	0.541882	1.02884e-07
FBgn0012344	3R:9638181-9650706	Dh44	54.5352	11.6976	16.3122	-0.287732	0.751496	0.0552217
FBgn0013263	3L:14747928-14761844	Trl	101.29	103.443	91.3429	-0.257039	1.62841	0.0845763
FBgn0013269	3R:15330737-15333133	FK506-bp1	118.544	27.2004	23.793	-0.339788	0.879015	0.385337
FBgn0013272	2R:22317661-22329720	Gp150	39.1402	42.0893	91.9206	-0.978423	0.807069	0.235683
FBgn0013275	3R:11954162-11956544	Hsp70Aa	0	0	0	-0.185695	#N/A	#N/A
FBgn0013276	3R:11958534-11962805	Hsp70Ab	0.684005	0.499734	1.02208	-0.699671	#N/A	#N/A
FBgn0013277	3R:12465452-12467776	Hsp70Ba	0.600082	0.372447	2.92237	-0.185695	96.3964	1.20229e-05
FBgn0013278	3R:12505792-12508139	Hsp70Bb	3.28384	2.71722	9.70623	-0.412983	0.743193	0.764586
FBgn0013279	3R:12509075-12511461	Hsp70Bc	1.92687	0.693521	3.28965	-0.357489	0.995368	0.997129
FBgn0013300	2L:14879049-14881652	ProtA	139.802	194.051	229.877	4.72631	1.04958	0.789557
FBgn0013301	2L:14882100-14883721	ProtB	105.023	139.968	166.49	4.31419	0.795029	0.11587
FBgn0013303	3L:19991886-19997568	Nca	76.6272	69.5602	85.8388	-0.771489	0.960558	0.809131
FBgn0013305	2R:12875163-12883253	Nmda1	105.607	95.7413	77.3249	0.102096	1.20653	0.0935385
FBgn0013307	2R:8004823-8006672	Odc1	0	0.402031	0	-0.558872	0.366441	0.0941271
FBgn0013308	2R:8007245-8009062	Odc2	6.24441	13.0369	8.83151	-0.252774	3.12359	5.29611e-08
FBgn0013323	2L:574290-576896	Ptth	38.2086	22.2531	17.3838	0.781619	2.03815	2.65855e-08
FBgn0013325	2R:19442341-19443825	RpL11	155.619	156.37	180.389	-0.379027	1.70389	0.000298541
FBgn0013334	3R:15935099-15962124	Sap47	37.2349	17.5727	19.2065	-0.726886	0.947157	0.786855
FBgn0013342	3L:1630347-1637752	nSyb	9.83775	21.7106	24.6112	-0.721587	1.44018	0.00151247
FBgn0013343	3R:24063076-24108960	Syx1A	31.5104	16.9025	19.4664	-1.00463	0.591549	0.0378468
FBgn0013347	3R:23890387-23891060	TfIIA-S	118.057	68.902	72.2144	1.40205	1.15114	0.305555
FBgn0013348	2R:5065236-5070210	TpnC41C	0	1.90414	0	-0.352683	0.752278	0.709539
FBgn0013432	X:2145135-2149647	bcn92	80.3437	60.7503	39.7072	-0.607764	1.18681	0.154972
FBgn0013433	2L:16049964-16081684	beat-Ia	1.26894	1.47659	1.33435	-0.563173	0.909115	0.85885
FBgn0013435	2R:10066649-10068702	Cdc2rk	48.6933	11.14	1.26688	1.57849	0.751534	0.0443659
FBgn0013467	2R:15155436-15190292	igl	1.93445	2.28395	1.71277	-0.676484	1.07333	0.837311
FBgn0013469	3L:10981170-11009188	klu	6.47198	0.216748	0.0989405	-0.444124	0.601032	0.0322315
FBgn0013531	2L:8071811-8072848	MED20	66.8166	23.8481	15.697	1.1554	1.37361	0.00936198
FBgn0013548	2R:23702476-23705403	l(2)dtl	10.2146	1.44019	1.75194	-0.339198	0.998327	0.994522
FBgn0013563	3L:14071891-14083229	Pex1	21.9444	10.4727	7.79199	-0.904309	1.03261	0.896063
FBgn0013576	3R:5270115-5350443	mtd	53.2005	62.2343	77.2487	-1.06242	1.09385	0.539642
FBgn0013672	mitochondrion_genome:3906-5525	mt:ATPase6	3.71859	6.08498	5.4681	na	3.48327	0.00804376
FBgn0013673	mitochondrion_genome:3906-5525	mt:ATPase8	0	0	0	na	0.446773	0.632567
FBgn0013674	mitochondrion_genome:1473-3010	mt:CoI	6.34812	8.68682	10.0294	na	1.4499	0.182403
FBgn0013675	mitochondrion_genome:3082-3838	mt:CoII	0.569143	0	0	na	1.02186	0.94604
FBgn0013676	mitochondrion_genome:3906-5525	mt:CoIII	7.27203	10.8525	12.5233	na	1.93873	0.172642
FBgn0013678	mitochondrion_genome:10498-11636	mt:Cyt-b	13.0749	21.1171	29.1533	na	1.69229	0.386493
FBgn0013679	mitochondrion_genome:11720-12659	mt:ND1	14.015	27.726	25.7136	na	1.55179	0.095032
FBgn0013680	mitochondrion_genome:239-1383	mt:ND2	0	0	0	na	0.505465	0.00485919
FBgn0013681	mitochondrion_genome:5607-5962	mt:ND3	0	2.3718	0	na	1.10326	0.913738
FBgn0013683	mitochondrion_genome:9544-9835	mt:ND4L	0	0	0	na	0.340955	0.0350329
FBgn0013684	mitochondrion_genome:6408-8125	mt:ND5	10.104	13.6369	14.6311	na	0.895268	0.850786
FBgn0013685	mitochondrion_genome:9970-10496	mt:ND6	0	0	0	na	0.284684	0.00581727
FBgn0013686	mitochondrion_genome:12669-14130	mt:lrRNA	5.13903	6.57329	9.3185	na	1.40607	0.508985
FBgn0013688	mitochondrion_genome:14130-14916	mt:srRNA	0	0	0	na	1.16524	0.806538
FBgn0013689	mitochondrion_genome:5982-6047	mt:tRNA:Ala-TGC	0	0	0	na	#N/A	#N/A
FBgn0013690	mitochondrion_genome:239-1383	mt:tRNA:Cys-GCA	0	0	0	na	#N/A	#N/A
FBgn0013691	mitochondrion_genome:3839-3906	mt:tRNA:Asp-GTC	0	0	0	na	#N/A	#N/A
FBgn0013692	mitochondrion_genome:6258-6325	mt:tRNA:Glu-TTC	0	0	0	na	#N/A	#N/A
FBgn0013693	mitochondrion_genome:6343-6408	mt:tRNA:Phe-GAA	0	0	0	na	#N/A	#N/A
FBgn0013694	mitochondrion_genome:5542-5607	mt:tRNA:Gly-TCC	0	0	0	na	#N/A	#N/A
FBgn0013695	mitochondrion_genome:8140-9544	mt:tRNA:His-GTG	0	0	0	na	#N/A	#N/A
FBgn0013696	mitochondrion_genome:0-65	mt:tRNA:Ile-GAT	0	0	0	na	#N/A	#N/A
FBgn0013697	mitochondrion_genome:3082-3838	mt:tRNA:Lys-CTT	0	0	0	na	#N/A	#N/A
FBgn0013698	mitochondrion_genome:12669-14130	mt:tRNA:Leu-TAG	0	0	0	na	#N/A	#N/A
FBgn0013699	mitochondrion_genome:3011-3077	mt:tRNA:Leu-TAA	0	0	0	na	#N/A	#N/A
FBgn0013700	mitochondrion_genome:170-239	mt:tRNA:Met-CAT	0	0	0	na	#N/A	#N/A
FBgn0013701	mitochondrion_genome:6125-6190	mt:tRNA:Asn-GTT	0	0	0	na	#N/A	#N/A
FBgn0013702	mitochondrion_genome:9903-9964	mt:tRNA:Pro-TGG	0	0	0	na	#N/A	#N/A
FBgn0013703	mitochondrion_genome:96-165	mt:tRNA:Gln-TTG	0	0	0	na	#N/A	#N/A
FBgn0013704	mitochondrion_genome:6061-6125	mt:tRNA:Arg-TCG	0	0	0	na	#N/A	#N/A
FBgn0013705	mitochondrion_genome:6190-6258	mt:tRNA:Ser-GCT	0	0	0	na	#N/A	#N/A
FBgn0013706	mitochondrion_genome:11637-11703	mt:tRNA:Ser-TGA	0	0	0	na	#N/A	#N/A
FBgn0013707	mitochondrion_genome:9837-9903	mt:tRNA:Thr-TGT	0	0	0	na	#N/A	#N/A
FBgn0013708	mitochondrion_genome:12669-14130	mt:tRNA:Val-TAC	0	0	0	na	#N/A	#N/A
FBgn0013709	mitochondrion_genome:239-1383	mt:tRNA:Trp-TCA	0	0	0	na	#N/A	#N/A
FBgn0013710	mitochondrion_genome:1402-1468	mt:tRNA:Tyr-GTA	0	0	0	na	#N/A	#N/A
FBgn0013717	3L:18618304-18622129	not	43.3685	17.7455	12.4176	0.210873	0.774004	0.0747777
FBgn0013718	3L:14190869-14233250	nuf	16.9904	25.3497	35.886	-0.683104	0.922671	0.580665
FBgn0013720	X:1470665-1472325	pck	39.9487	26.3013	52.572	0.0268004	1.14313	0.339896
FBgn0013725	2R:14427335-14432337	phyl	2.85178	4.22866	3.55724	-0.611143	0.764264	0.368719
FBgn0013726	2R:8237270-8240297	pnut	35.4007	22.4194	19.2652	-0.669355	0.915141	0.638036
FBgn0013732	2R:6657325-6660624	sced	19.3609	4.82915	5.83275	-0.434539	1.04781	0.821434
FBgn0013733	2R:13864236-13942110	shot	3.0897	4.4581	14.3449	-1.38296	0.513659	0.000633307
FBgn0013746	2L:8993817-8997379	alien	105.553	49.4863	34.7166	0.145575	0.98997	0.945499
FBgn0013749	4:1124166-1125325	Arf102F	120.092	135.818	138.351	0.748739	1.82186	9.60586e-06
FBgn0013750	2R:15322500-15325490	Arf51F	67.1944	77.491	82.9523	-1.67757	0.789268	0.02478
FBgn0013751	3L:3846205-3861692	Awh	0.178077	0	0	-0.912258	9.28865	1.74504e-06
FBgn0013753	3L:1639710-1640952	Bgb	35.3049	4.21414	2.55518	-0.295844	0.706828	0.0610272
FBgn0013755	3L:1647868-1648612	Bro	3.72013	4.84171	5.02438	3.61033	0.869675	0.719049
FBgn0013756	2R:11852616-11861202	Mtor	51.2357	13.5761	10.5707	-0.569191	0.983156	0.948886
FBgn0013759	3R:21783399-21822674	CASK	12.4427	5.85731	6.72708	-1.0009	0.831498	0.311981
FBgn0013762	2R:15566270-15573991	Cdk5	29.8053	15.6704	15.2473	3.42469	0.930606	0.655902
FBgn0013763	2R:16673234-16732916	Idgf6	3.47193	8.53442	85.0651	-0.727669	2.33437	2.33612e-12
FBgn0013764	2R:24031537-24033943	Chi	72.7438	38.0188	28.6698	1.69812	0.95503	0.739569
FBgn0013765	2R:13439313-13450475	cnn	199.512	271.808	247.578	2.35243	0.859836	0.214755
FBgn0013767	3R:14314853-14315716	Crz	1.21349	0.901937	0.78133	-0.56463	0.885805	0.885919
FBgn0013770	2R:13960674-13967981	Cp1	130.989	137.653	213.166	-0.194901	0.974267	0.897047
FBgn0013771	2R:14877785-14881372	Cyp6a9	4.3455	3.87429	8.94932	-0.66267	0.295102	2.64896e-16
FBgn0013772	2R:14887170-14889010	Cyp6a8	0.595762	0.27008	0.618958	-0.601513	5.2873	NA
FBgn0013773	2R:14871365-14873705	Cyp6a22	1.60154	0.774026	2.87204	-0.592821	0.865325	0.615869
FBgn0013799	3L:19818173-19830686	Deaf1	56.2332	21.4163	21.6575	-0.85626	1.05496	0.737162
FBgn0013809	X:18064482-18078472	Dhc16F	36.2908	51.3287	37.1802	4.70939	#N/A	#N/A
FBgn0013810	2L:17501400-17525515	Dhc36C	48.3043	82.9894	72.1207	4.27757	0.426033	2.47959e-07
FBgn0013811	3L:1756158-1771758	Dhc62B	31.9641	47.6546	36.0091	4.73669	0.390956	5.77193e-08
FBgn0013812	3R:21024579-21042499	Dhc93AB	0.725712	0.737607	0.347581	-0.783218	1.25723	0.572248
FBgn0013813	3R:28486952-28519398	Dhc98D	54.991	60.267	46.0235	3.16891	0.424915	4.11109e-08
FBgn0013949	3R:24865349-24867651	Elal	0.655037	0.838931	0.656802	-0.7641	1.41096	0.589954
FBgn0013953	3R:24841934-24850412	Esp	6.47679	11.122	14.8939	0.182761	0.699941	0.0215558
FBgn0013954	2R:19290108-19290962	FK506-bp2	155.19	155.71	161.322	1.55971	1.21616	0.148703
FBgn0013972	3R:29682502-29689311	Gycalpha99B	0	0.504541	0.1682	-0.72362	0.147504	0.0158694
FBgn0013973	3R:31134391-31178278	Gycbeta100B	0.397132	0	0.187895	-0.741585	3.88707	0.000631759
FBgn0013981	3R:14625754-14626614	His4r	152.78	151.185	195.089	0.110673	1.33675	0.0124117
FBgn0013983	2R:18409047-18421124	imd	57.71	75.8507	66.0432	0.648852	0.630446	6.73342e-06
FBgn0013984	3R:21570247-21619321	InR	9.87999	5.46577	6.54667	-1.25943	#N/A	#N/A
FBgn0013987	X:5759907-5764203	MAPk-Ak2	33.176	14.7249	29.3191	-1.67299	1.35384	0.0378217
FBgn0013995	3R:20978182-21015613	Calx	100.438	152.231	152.559	2.10616	0.534683	1.68776e-05
FBgn0013997	3L:12146518-12156990	Nrx-IV	60.1891	35.4138	39.9825	-0.486038	0.868845	0.5083
FBgn0014000	2L:19966726-19967685	Hf	1.78181	3.73192	7.74108	-0.775048	1.45061	0.207832
FBgn0014002	3L:15137737-15142840	Pdi	135.947	111.364	135.596	-0.211486	#N/A	#N/A
FBgn0014006	3R:19879718-19886030	Ask1	43.8558	8.89365	9.48453	-0.444837	0.795112	0.169728
FBgn0014007	3L:12734944-12741568	Ptp69D	43.2769	19.101	14.9463	-0.632576	0.719192	0.0231023
FBgn0014009	2R:6696738-6699469	Rab2	101.151	70.4167	64.91	-1.24462	1.25567	0.0292564
FBgn0014010	2L:2359141-2365273	Rab5	79.228	56.296	78.2225	-1.04788	1.08457	0.560738
FBgn0014011	3L:7423826-7454717	Rac2	8.8098	9.55622	16.9795	-1.77324	2.19621	3.0263e-06
FBgn0014018	3R:9042507-9052231	Rel	15.1718	7.15042	10.2573	-1.58099	0.951558	0.848838
FBgn0014019	2L:12008152-12009832	Rh5	16.5543	17.3078	7.73058	-0.396729	0.534015	0.000499687
FBgn0014020	2R:16102686-16107229	Rho1	111.983	89.7228	132.187	-1.96318	1.29616	0.0227995
FBgn0014022	3R:9513326-9515908	Rlb1	30.2134	6.64188	4.96063	-0.727227	0.75793	0.0802458
FBgn0014023	3R:9513326-9515908	mRpL47	61.0146	27.2324	21.4362	2.55252	0.88769	0.451296
FBgn0014024	X:5317408-5322696	Rnp4F	37.94	13.5083	13.2285	-0.695527	0.766748	0.114934
FBgn0014026	X:6530896-6533348	RpL7A	166.212	132.403	182.05	-1.10466	1.91468	1.27817e-05
FBgn0014028	2R:6807625-6809766	SdhB	49.3248	30.3209	47.3955	-0.888628	1.75127	2.61332e-05
FBgn0014029	3R:20586128-20588549	Sep2	53.7956	30.8167	50.5871	-0.208527	1.06007	0.664022
FBgn0014031	X:6528947-6530726	Spat	3.507	6.06741	11.3298	-0.693703	1.22658	0.263388
FBgn0014032	X:8461478-8464438	Sptr	30.1799	6.9795	8.33641	-1.00749	0.966886	0.876726
FBgn0014033	2L:4121701-4124153	Sr-CI	0.155853	0	0	-0.806583	1.589	0.406272
FBgn0014037	3L:19882050-19910215	Su(Tpl)	117.492	110.804	103.468	-0.151099	0.836755	0.302399
FBgn0014073	3L:4510697-4532145	Tie	2.50125	3.4751	11.8998	-0.460133	0.89219	0.507065
FBgn0014075	3L:18872746-18878245	Ugt	61.3892	39.5904	36.5275	-0.712437	1.07204	0.701724
FBgn0014076	2L:11156117-11203544	Vm32E	0	0	0	-0.376678	#N/A	#N/A
FBgn0014092	2L:16327068-16329132	CG4278	49.1003	12.5138	12.9953	0.459055	0.950752	0.798685
FBgn0014127	2L:20058162-20061370	barr	97.6015	93.1551	62.1868	1.39237	0.801977	0.0593936
FBgn0014133	X:11678969-11694740	bif	28.1943	13.805	29.7976	-0.937185	1.16425	0.381766
FBgn0014135	3R:19794072-19836817	bnl	9.16347	5.64521	4.93546	-0.832688	1.08043	0.68182
FBgn0014141	3R:17088279-17125389	cher	6.11482	5.3926	13.2509	-0.541407	1.18827	0.416119
FBgn0014143	3L:21474132-21476479	croc	4.20138	4.20464	5.17917	2.86153	1.67772	0.00784009
FBgn0014163	3L:16402795-16411828	fax	72.6621	112.153	139.354	-0.488789	0.830221	0.327312
FBgn0014179	2L:9578119-9581745	gcm	12.6534	8.1566	8.96234	0.303657	0.820119	0.318521
FBgn0014184	2R:12166294-12174264	Oda	85.2384	91.0048	126.72	-0.838897	1.7744	6.43125e-05
FBgn0014189	2L:5539325-5542314	Hel25E	94.1474	20.795	23.4226	-0.427443	0.950106	0.745671
FBgn0014269	2R:18969403-18971133	prod	40.2876	31.237	29.4286	0.324073	1.07777	0.575499
FBgn0014340	X:5873839-5876853	mof	22.9185	4.04352	2.45014	0.210026	0.72197	0.0292561
FBgn0014342	3R:5548114-5551168	mia	66.6966	76.7986	68.8759	3.1433	0.411722	5.23679e-17
FBgn0014343	3L:12693638-12710249	mirr	4.83632	3.95922	3.16227	-0.796326	2.43086	5.26096e-06
FBgn0014366	3R:5588872-5591459	noi	66.3686	26.4379	17.8724	1.51068	0.862235	0.232664
FBgn0014368	3L:11123347-11134663	nol	0	0	0.957978	-0.237877	2.36781	0.380354
FBgn0014380	3R:9497100-9502581	RhoL	18.0544	22.6875	46.9519	-0.592048	1.45287	0.00285124
FBgn0014388	3L:3401152-3424935	sty	6.12011	5.72517	6.99355	-1.42964	0.860138	0.489197
FBgn0014391	X:15847858-15849258	sun	100.7	123.103	121.099	0.237528	1.7876	1.17838e-05
FBgn0014395	X:22449736-22455422	tilB	87.2437	76.5714	51.9891	4.32443	1.06002	0.617771
FBgn0014396	2L:3493985-3508119	tim	2.66629	2.17766	7.99762	-0.650359	1.39043	0.120296
FBgn0014411	X:1873852-1877270	Vps26	55.9263	41.4531	39.0801	-1.31336	1.1543	0.258248
FBgn0014417	2L:8408887-8411868	CG13397	10.929	5.08265	2.31096	-0.675486	1.54352	0.00482471
FBgn0014427	3R:29200453-29202525	CG11899	22.3949	17.3558	25.0818	-0.413008	0.980474	0.932118
FBgn0014454	2L:7740561-7741537	Acp1	0	0	0	-0.335647	10.4902	0.153777
FBgn0014455	X:15450260-15453167	Ahcy	50.7074	33.4869	31.7355	-0.21024	0.779626	0.0374632
FBgn0014464	X:8465689-8483885	Cp7Fa	1.45297	0.425817	0	-0.363001	2.57441	0.42402
FBgn0014465	X:8465689-8483885	Cp7Fb	0.152794	0	0	-0.352202	#N/A	#N/A
FBgn0014466	X:8465689-8483885	Cp7Fc	0	0	0	-0.264328	#N/A	#N/A
FBgn0014469	2R:8444559-8447164	Cyp4e2	3.29078	2.63109	6.08736	-1.23741	2.47669	0.0628058
FBgn0014848	3L:15658935-15659441	Eig71Eh	0	0	0	-0.195502	#N/A	#N/A
FBgn0014849	3L:15659706-15660351	Eig71Ei	2.81172	0	0	-0.203596	#N/A	#N/A
FBgn0014850	3L:15660548-15661015	Eig71Ej	3.77219	0	0	-0.264379	3.25148	0.106969
FBgn0014851	3L:15661247-15661809	Eig71Ek	2.28152	1.3383	0	-0.195566	0.484276	0.535626
FBgn0014857	2L:5055057-5058248	His3.3A	157.66	178.087	141.635	1.85155	1.05775	0.649485
FBgn0014859	2L:20682367-20714588	Hr38	0.7777	0.284974	0.159418	-0.777589	8.03854	0.00221426
FBgn0014861	3R:8264969-8267924	Mcm2	17.5683	11.3683	8.25877	-0.243276	0.42168	5.43988e-10
FBgn0014863	3R:7093934-7124185	Mlp84B	23.4376	34.0233	30.536	-0.593369	2.15975	4.82882e-07
FBgn0014865	2R:15401095-15471884	Mtk	5.7684	3.67094	0	-0.705739	0.577139	0.348571
FBgn0014868	X:9156928-9158515	Ost48	100.261	60.5318	57.6158	1.04173	1.52187	0.00578854
FBgn0014869	3R:29148247-29151794	Pglym78	36.8263	32.0529	55.9489	-0.906074	2.03001	4.74198e-07
FBgn0014870	2R:16856219-16867714	Psi	83.3173	23.7998	11.2099	-0.0255487	0.717181	0.0436339
FBgn0014877	2R:13554076-13555606	Roe1	155.862	214.251	226.094	4.69733	0.913446	0.50542
FBgn0014879	3R:15263551-15265253	Set	96.0522	63.1126	45.9819	-0.321632	0.995703	0.977897
FBgn0014903	X:1012778-1046040	CG14630	1.14351	2.27924	6.00804	-0.648811	#N/A	#N/A
FBgn0014906	2L:3163644-3169462	Hydr2	102.918	146.076	150.982	2.80059	0.834304	0.0782316
FBgn0014930	3R:7912016-7913290	CG2846	31.0327	10.6831	19.0037	-0.885937	1.97428	6.25622e-05
FBgn0014931	3R:7913850-7916550	CG2678	5.34734	0.712811	1.50536	-0.58426	1.31336	0.392974
FBgn0014949	3R:22584772-22586625	btn	0	1.42564	0	na	#N/A	#N/A
FBgn0015000	2L:4945578-4949784	betaggt-I	17.8901	10.2728	15.512	-0.310601	1.32923	0.0538838
FBgn0015001	2R:11356719-11357537	iotaTry	1.35981	0	0	-0.0702312	1.27314	0.758214
FBgn0015008	3R:16975884-16977795	Actn3	109.076	165.989	180.196	2.97249	0.804846	0.0789329
FBgn0015010	X:14784663-14826073	Ag5r	1.14171	1.99106	1.2109	-0.253212	0.201406	7.4286e-08
FBgn0015011	3R:16978438-16982158	AhcyL2	0.961099	0.408372	1.40036	-0.622173	4.55466	7.81826e-06
FBgn0015019	3R:16647604-16649978	CCT3	117.679	39.4867	40.7255	0.162431	0.76827	0.0721309
FBgn0015024	X:12653625-12657834	CkIalpha	90.6676	42.9549	48.3012	-1.72698	1.06962	0.721225
FBgn0015025	3L:15816978-15818621	CkIIalpha-i1	32.4481	8.47968	5.35063	0.694469	0.985894	0.940277
FBgn0015031	2L:5327226-5327969	cype	119.308	108.398	168.753	-0.548399	1.28142	0.127031
FBgn0015032	3R:30894037-30900688	Cyp4c3	5.03212	5.68005	4.20527	0.835107	0.690121	0.0722677
FBgn0015033	3L:7493556-7496179	Cyp4d8	0.865592	2.23978	4.42259	-0.00942292	1.17293	0.460895
FBgn0015034	2R:8447450-8451904	Cyp4e1	0.183403	0.229305	0.229974	-0.152499	0.277762	0.000214959
FBgn0015035	2L:9747838-9750071	Cyp4e3	0.40731	0.44935	0	-0.57343	0.251445	NA
FBgn0015036	X:2172525-2180998	Cyp4ae1	1.07129	2.79385	11.3794	0.282548	0.39463	0.526292
FBgn0015037	2R:9227784-9247249	Cyp4p1	8.6912	10.9361	34.306	-0.735522	0.888691	0.422328
FBgn0015038	2R:7086315-7129808	Cyp9b1	0.185721	0	0.397435	-0.98407	0.503336	0.661906
FBgn0015039	2R:7130276-7132139	Cyp9b2	1.03368	1.02687	13.9324	-0.775408	2.02214	0.100645
FBgn0015040	2R:24615422-24638588	Cyp9c1	7.34072	1.61918	7.10092	-0.648717	#N/A	#N/A
FBgn0015075	3L:22263368-22266679	Ddx1	93.13	31.6198	16.1399	3.04638	1.049	0.813599
FBgn0015218	3L:9399617-9402460	eIF4E1	152.235	188.28	187.227	0.203546	1.12293	0.218935
FBgn0015221	3R:30385572-30390584	Fer2LCH	159.495	231.142	240.53	-0.617029	0.989105	0.937139
FBgn0015222	3R:30385572-30390584	Fer1HCH	177.791	260.75	283.566	-0.389049	0.88004	0.198909
FBgn0015229	3R:21850693-21856266	glec	9.46009	3.57357	7.59187	-1.0552	1.22295	0.203378
FBgn0015230	3R:16788310-16790021	Glut3	115.695	162.725	140.272	5.05495	0.55974	0.000707887
FBgn0015239	3L:21494018-21507538	Hr78	28.0996	28.733	30.7755	-0.719	1.26618	0.0866799
FBgn0015240	3R:25025234-25029351	Hr96	39.3777	20.0328	20.0235	0.699069	0.827264	0.151859
FBgn0015245	X:11108481-11112308	Hsp60A	154.294	206.379	204.359	2.41687	0.814253	0.0986433
FBgn0015247	2R:15932169-15940073	Diap2	114.514	126.683	122.333	4.01488	0.938262	0.617858
FBgn0015268	2R:23903749-23907294	Nap1	129.913	73.9831	87.2482	-0.435269	1.03693	0.961263
FBgn0015269	3R:25983012-25995737	Nf1	50.8295	31.8617	28.6272	-0.710344	0.52605	0.000102039
FBgn0015270	3R:13964884-14032057	Orc2	15.6156	2.76497	2.64641	0.150325	0.734924	0.0851787
FBgn0015271	2L:13829836-13833105	Orc5	25.6046	11.3065	11.3201	0.441127	0.911558	0.604484
FBgn0015277	2R:23560491-23564780	Pi3K59F	4.79522	1.31694	1.88907	-1.31157	1.22444	0.31258
FBgn0015278	3L:11774649-11790013	Pi3K68D	56.9912	81.1056	87.7349	1.29168	0.838588	0.164014
FBgn0015279	3R:20628971-20634732	Pi3K92E	37.9214	7.02082	14.1791	-1.02318	0.835953	0.366394
FBgn0015282	3R:23929242-23931558	Rpt2	141.811	156.664	154.973	0.842673	0.980906	0.872268
FBgn0015283	3L:21536999-21538582	Rpn10	149.216	190.532	187.537	1.45099	0.859174	0.103419
FBgn0015286	X:3704609-3719635	Rala	14.5493	8.17929	18.4305	-1.2883	1.16201	0.554436
FBgn0015288	X:762559-765130	RpL22	73.0173	68.7925	142.883	-2.11009	2.20526	1.36051e-07
FBgn0015295	2R:16197041-16202884	Shark	11.0896	5.30156	6.09884	-0.545041	0.900712	0.572876
FBgn0015296	3L:9427009-9428671	Shc	80.1733	59.4814	42.5345	1.43679	0.711134	0.000187496
FBgn0015298	3L:7347309-7348034	Srp19	98.1165	57.9939	41.7024	0.504626	1.76334	2.53348e-05
FBgn0015299	2L:8211346-8211938	Ssb-c31a	116.567	40.788	38.0793	3.0146	1.05111	0.76524
FBgn0015300	2R:24499242-24500267	Ssl	126.378	126.308	94.1509	4.62102	1.60662	2.53893e-05
FBgn0015316	2L:8997604-8999816	Try29F	30.2966	29.7313	26.8755	0.61521	3.13186	4.36938e-16
FBgn0015320	2L:10765009-10768006	Ubc2	131.655	176.004	179.363	3.65106	0.958376	0.757881
FBgn0015321	3L:9698335-9700481	Ubc4	147.918	207.25	219.161	4.06727	0.956894	0.76335
FBgn0015324	3R:5591762-5595356	Vha26	131.011	144.576	168.557	-0.810063	#N/A	#N/A
FBgn0015331	3R:4233046-4235041	abs	79.7741	58.6317	56.5488	4.15372	0.735768	0.001283
FBgn0015336	X:16655358-16668712	CG15865	5.34283	4.0802	3.48645	-0.38751	0.0253229	2.20016e-25
FBgn0015338	2L:16303263-16307298	CG5861	82.9761	55.2218	41.8196	3.4991	1.19523	0.117907
FBgn0015351	3R:16649980-16651157	CG14906	22.12	4.2164	7.42845	0.249269	1.25799	0.268777
FBgn0015359	3L:2257455-2262664	CG2034	130.814	170.258	148.074	3.53757	0.905537	0.39251
FBgn0015360	3L:2257455-2262664	oxt	43.2834	33.301	29.8212	0.654271	0.684199	0.000284782
FBgn0015371	2R:15115235-15144783	chn	1.60393	1.48953	1.30844	-0.865424	0.590338	0.0147905
FBgn0015372	2R:23519838-23523613	RabX1	76.7472	47.1662	33.8958	-0.356131	1.27601	0.0201595
FBgn0015376	2L:3707229-3711748	cutlet	16.9918	11.7378	6.06462	-0.275038	0.241826	1.59631e-15
FBgn0015379	X:21345357-21349843	dod	68.7804	71.7617	73.1729	2.59189	1.19752	0.145016
FBgn0015380	2L:19190341-19208621	drl	2.51002	2.4374	2.5353	-0.594336	0.886678	0.610671
FBgn0015381	2L:5925204-5939261	dsf	0.859253	0.127876	0.474236	-0.368248	1.19196	0.71601
FBgn0015391	2L:16732549-16738388	glu	25.4265	5.88262	2.69336	-0.33445	0.669707	0.0232386
FBgn0015393	2L:9699790-9700459	hoip	67.2071	16.2926	21.8672	-0.226334	#N/A	#N/A
FBgn0015396	3R:10350181-10361612	jumu	16.6128	12.0515	6.79457	-0.39994	0.715492	0.071496
FBgn0015399	2L:12816999-12822787	kek1	4.97812	1.27367	7.94789	-0.835861	1.56438	0.021336
FBgn0015400	2L:11581936-11626883	kek2	0.827436	1.53999	1.01924	-0.613491	0.78332	0.473687
FBgn0015402	3R:5474898-5485393	ksr	48.2275	31.2631	30.8954	0.491948	0.534304	1.464e-07
FBgn0015477	2R:9167762-9177261	Rme-8	38.4951	22.0223	24.0321	-0.504736	0.573612	0.000182676
FBgn0015509	2R:7916855-7922604	Cul1	87.4833	119.428	120.244	0.6519	0.743031	0.00424522
FBgn0015513	3R:23781764-23801634	mbc	11.0009	3.98649	9.66624	-1.52815	0.99229	0.98027
FBgn0015519	X:8252669-8367169	nAChRalpha3	0.0786112	0.214555	0.0979359	-0.632006	0.974882	0.979316
FBgn0015520	3R:16640204-16643112	nonA-l	112.605	31.7843	16.1043	0.792957	0.68055	0.011163
FBgn0015521	2L:2856069-2857029	RpS21	172.598	171.694	211.851	-0.136606	1.65665	0.000691119
FBgn0015522	2R:17843441-17860582	olf186-M	1.93885	4.3925	4.47027	-0.573066	0.748447	0.207793
FBgn0015524	2R:20883624-20903414	otp	1.80795	4.38035	5.38028	0.00675815	0.61472	0.0193843
FBgn0015527	X:21345357-21349843	peng	29.9945	6.34107	4.80913	0.12429	0.891233	0.603635
FBgn0015541	3R:26915760-26945309	sda	7.74882	3.07972	9.35622	-1.44962	#N/A	#N/A
FBgn0015543	2R:11891134-11895762	snoRNA:Me28S-A1322	0	0	0	-1.12328	0.430252	0.504122
FBgn0015544	2R:24159383-24161503	spag	103.202	48.5541	33.2323	1.06834	0.898011	0.392135
FBgn0015546	2L:14362068-14366840	spel1	20.8039	2.12669	1.72668	0.132106	0.58842	0.001795
FBgn0015550	3L:17359681-17361811	tap	0	0	0	-0.265734	#N/A	#N/A
FBgn0015553	2L:18677220-18683715	tos	5.22317	0.526831	0	-0.307788	0.582048	0.0368565
FBgn0015558	X:21328612-21339676	tty	12.3507	4.56347	2.41739	-0.597223	0.957275	0.848105
FBgn0015561	2R:9195204-9199870	unpg	0	0	0.242526	-0.508455	0.742514	0.854743
FBgn0015568	3R:7545732-7549124	alpha-Est1	5.145	10.389	14.9055	-0.304558	0.72645	0.0105961
FBgn0015569	3R:7486582-7493845	alpha-Est10	54.8796	39.3639	32.2742	0.324681	0.75977	0.0182783
FBgn0015570	3R:7541809-7545250	alpha-Est2	0.57139	0	0.55743	-0.797911	0.942828	0.939127
FBgn0015571	3R:7536686-7541631	alpha-Est3	126.972	207.273	235.415	4.79215	#N/A	#N/A
FBgn0015572	3R:7536686-7541631	alpha-Est4	5.34519	4.38474	4.12057	-0.222189	1.45325	0.0890187
FBgn0015574	3R:7524566-7528777	alpha-Est6	91.5043	98.5792	79.8411	4.07854	0.938752	0.615651
FBgn0015575	3R:7519562-7523753	alpha-Est7	2.09962	1.97315	9.77073	-0.900888	0.539699	0.00872664
FBgn0015576	3R:7509342-7515670	alpha-Est8	2.83165	6.38227	27.8141	-0.756535	0.916087	0.599805
FBgn0015577	3R:7493920-7505098	alpha-Est9	5.43827	2.42941	1.30296	-1.17283	1.41259	0.14171
FBgn0015582	2R:11285147-11293591	dare	14.0508	5.3615	6.33559	-0.665329	1.16363	0.414836
FBgn0015583	2L:8392455-8393222	Acp29AB	11.7143	7.6918	5.45515	-0.0456787	21.322	7.83484e-11
FBgn0015584	2R:16749802-16750335	Acp53Ea	116.138	104.45	58.6043	0.140083	25.6355	1.00101e-12
FBgn0015585	3L:3814210-3818383	Acp63F	96.6685	70.601	19.5951	0.204017	19.7777	1.63107e-08
FBgn0015586	3L:19050756-19052026	Acp76A	55.2357	37.6168	15.4612	-0.0592205	16.2062	1.43346e-08
FBgn0015589	3R:28832300-28844748	Apc	26.5256	12.2828	9.73516	-0.561608	0.557904	0.00130748
FBgn0015591	3R:24760529-24765071	AstA	2.56374	4.46522	7.76114	-0.982876	1.23602	0.658108
FBgn0015600	2L:3068344-3144786	toc	164.595	243.688	272.257	4.15436	0.680385	0.00479685
FBgn0015602	2R:14769598-14772630	BEAF-32	57.0062	18.6687	15.0936	-0.616761	1.0524	0.766332
FBgn0015609	2L:17647052-17778340	CadN	4.10835	6.24268	6.46964	-0.460031	1.19055	0.163408
FBgn0015614	2R:7786009-7789053	CanB2	57.3855	55.9977	72.4164	-0.899072	1.25408	0.0660947
FBgn0015615	X:16588995-16593439	SMC3	15.1645	1.42312	1.83569	-0.733734	0.618381	0.0131779
FBgn0015618	3L:9837079-9838670	Cdk8	9.41215	2.36229	2.09245	-0.761902	1.03337	0.907425
FBgn0015621	2L:819963-821209	Clp	39.3615	18.7163	5.05981	1.68955	0.907364	0.534716
FBgn0015622	3R:29315253-29319644	Cnx99A	171.223	191.069	177.994	0.496169	1.00558	0.971557
FBgn0015623	2L:6338835-6346280	Cpr	38.884	59.9641	76.4434	-0.490039	1.5269	0.00136188
FBgn0015625	3R:24867933-24870816	CycB3	85.897	64.3488	26.3637	0.504922	0.976769	0.87168
FBgn0015663	2L:3619096-3621681	Dot	2.32237	3.40268	6.1712	-0.906727	1.77954	0.0146949
FBgn0015664	2L:9964146-9967229	Dref	30.4029	4.11175	5.03848	-0.701808	0.873749	0.515602
FBgn0015714	2R:14873952-14875739	Cyp6a17	2.96348	6.06744	12.3775	-1.11022	0.660753	0.0313741
FBgn0015721	2R:21101927-21123704	ktub	32.0649	11.826	6.33375	2.65272	1.29504	0.0268598
FBgn0015737	3R:27288768-27292209	Hmu	57.0768	25.1835	40.5808	-1.02376	1.24853	0.161688
FBgn0015754	2R:16178825-16185103	Lis-1	41.3326	15.9667	24.8535	-1.30665	1.13852	0.416879
FBgn0015756	2L:11002757-11004189	RpL9	147.194	135.907	189.739	-0.317228	1.79669	4.6619e-05
FBgn0015765	3R:24150415-24152321	p38a	60.8969	61.2214	54.0752	-0.402441	1.06016	0.668159
FBgn0015766	3L:5566918-5577348	Msr-110	56.9103	113.118	184.803	-0.438342	1.58881	0.00190117
FBgn0015770	3R:7365849-7369305	MstProx	3.86546	3.1252	4.37999	na	1.06084	0.862174
FBgn0015772	2L:18957731-18968744	Nak	21.0461	12.1693	19.6084	-1.2816	0.878321	0.501618
FBgn0015773	X:14604011-14653928	NetA	0.419981	1.7809	2.92618	-0.420407	0.508475	0.00253662
FBgn0015774	X:14686037-14749376	NetB	1.2091	0.71835	1.81029	-0.419198	0.58465	0.00766591
FBgn0015776	2L:6778554-6786861	nrv1	12.5618	12.7784	18.0289	-1.23984	1.5717	0.00204222
FBgn0015777	2L:6789769-6798862	nrv2	145.715	205.48	224.186	1.66017	0.769466	0.00970439
FBgn0015778	3R:13647003-13654527	rin	162.475	220.041	208.627	-0.19661	0.83378	0.167945
FBgn0015781	3R:19028930-19031271	P5cr	42.0226	12.8887	16.3927	1.15523	0.96405	0.857195
FBgn0015789	X:20251337-20254691	Rab10	28.1129	14.6726	21.788	-1.26334	1.35895	0.0613554
FBgn0015790	3R:21111407-21116146	Rab11	110.671	77.5511	93.5784	-1.21899	1.20383	0.107041
FBgn0015791	2L:14355144-14358764	Rab14	116.062	190.588	202.336	1.31424	0.909783	0.508741
FBgn0015793	3L:8297017-8299839	Rab19	112.935	108.784	78.6122	3.11182	1.27292	0.00992317
FBgn0015794	X:5670826-5671812	Rab18	56.2098	43.1156	36.8449	0.226441	1.50492	0.0031988
FBgn0015795	3R:23993007-23995452	Rab7	98.4322	108.517	120.966	-1.31313	1.1554	0.127732
FBgn0015797	2L:12107220-12109116	Rab6	34.0296	17.0581	36.2915	-0.987572	1.64518	0.000187276
FBgn0015799	X:797089-801479	Rbf	47.7894	38.0194	30.7841	0.562014	0.937527	0.697161
FBgn0015801	2R:24788007-24793410	Reg-5	20.8532	13.822	18.2051	-0.646859	1.35534	0.0146504
FBgn0015803	2L:20350433-20365254	RtGEF	37.7649	19.2403	18.9219	-1.08097	0.998886	0.995452
FBgn0015805	3L:4626601-4629467	HDAC1	20.3504	8.09326	10.7937	-0.702825	1.83726	5.81617e-07
FBgn0015806	3L:5797548-5810931	S6k	10.0932	8.09133	10.6894	-2.5198	#N/A	#N/A
FBgn0015808	2L:18831228-18833630	ScpX	69.612	26.9933	32.1796	1.32957	0.98078	0.924342
FBgn0015818	X:6255821-6257596	Spx	55.226	13.279	5.46272	0.258292	1.08441	0.634431
FBgn0015828	3L:11682037-11683805	TfIIEalpha	69.2453	27.075	24.4385	1.48806	0.725761	0.000729246
FBgn0015829	3L:4287037-4288349	TfIIEbeta	99.7656	44.3713	24.5554	3.15762	0.90135	0.486923
FBgn0015831	3R:7528863-7530241	Rtnl2	116.842	168.422	133.178	4.63608	1.0084	0.951981
FBgn0015834	2L:4965672-4967775	eIF3i	133.09	109.991	123.692	0.16452	1.10339	0.452224
FBgn0015838	2R:9103237-9106796	Vang	25.1977	10.8532	13.8882	-0.300442	1.15323	0.393574
FBgn0015872	2R:11411202-11429645	Drip	28.1816	45.1428	79.1468	-0.142418	0.845331	0.287814
FBgn0015903	2R:23564890-23600787	apt	58.9659	35.5096	24.0249	0.208868	0.777049	0.0250679
FBgn0015904	3L:12580671-12596018	ara	0.562888	0.158095	0.266725	-0.708369	4.21982	0.00165429
FBgn0015905	2L:1077947-1080803	ast	69.1083	45.5534	30.9149	1.61867	1.41113	0.00264126
FBgn0015919	3L:12609630-12621798	caup	3.56099	3.97256	3.30596	-0.617648	2.12969	0.0169093
FBgn0015924	2L:431226-453024	crq	28.0242	20.2222	29.6498	-1.01265	1.15751	0.526447
FBgn0015925	2R:16264651-16266959	csul	28.93	1.82928	3.18698	-0.337761	0.715712	0.0682564
FBgn0015926	X:15328341-15333154	dah	3.23878	0.360869	0.337241	-0.244546	0.685465	0.345773
FBgn0015929	2R:7496701-7500145	dpa	35.7106	28.1009	23.0874	-0.0413782	0.898132	0.39751
FBgn0015946	3L:18302718-18304417	grim	0.351359	0	0	-0.227105	#N/A	#N/A
FBgn0015949	2R:19663918-19669832	hrg	75.5907	21.7595	13.4923	-1.09994	0.900696	0.607706
FBgn0016013	3L:4072031-4073954	Faa	19.134	26.83	26.2111	0.0203887	1.17228	0.4699
FBgn0016031	3L:5343618-5355923	lama	4.48583	7.0872	14.8025	-1.54668	0.740383	0.849791
FBgn0016032	2R:7049237-7051964	lbm	1.66529	2.04292	4.63803	-1.13114	1.9089	0.0165053
FBgn0016034	3L:22721202-22727789	mael	107.922	61.443	35.3757	1.57268	1.02391	0.880778
FBgn0016036	3L:7244387-7245383	mei-P22	61.5249	45.3208	25.5577	-0.501871	1.40886	0.301904
FBgn0016038	X:621529-623051	Vsp37A	117.831	168.682	149.998	4.91072	0.963261	0.768533
FBgn0016041	X:7736892-7739978	Tom40	87.3438	104.606	104.97	0.554537	0.924997	0.467231
FBgn0016047	2R:11310334-11318676	nompA	0	0.0891312	0.230673	-0.474715	0.444301	0.347714
FBgn0016053	2R:22329725-22332813	pgc	1.67451e-05	0.777325	0	-0.266564	0.862509	0.926548
FBgn0016054	2L:20643350-20645791	phr6-4	46.2466	64.372	63.9696	1.08817	3.89722	1.36087e-26
FBgn0016059	2R:17672838-17683499	Sema1b	58.044	37.9874	48.4368	-0.558294	0.926061	0.6772
FBgn0016061	3R:27375087-27437482	side	0.5047	0.328043	0.482191	-0.641301	1.15589	0.681606
FBgn0016070	3L:8990316-8997989	smg	60.2126	32.2986	21.106	-0.247363	0.769455	0.0688544
FBgn0016075	2L:5012143-5028191	vkg	5.84748	9.92696	13.8445	-0.986385	1.2969	0.400115
FBgn0016076	2L:5288943-5311223	vri	2.86651	3.51684	7.32243	-1.07307	1.22983	0.286986
FBgn0016078	2R:9400530-9413463	wun	8.6637	14.8142	30.4421	-0.702895	1.30504	0.044903
FBgn0016080	X:17151230-17159306	xmas-1	121.252	194.36	198.916	4.6241	#N/A	#N/A
FBgn0016081	3L:9631833-9679103	fry	46.4738	64.8888	71.9917	1.23988	0.547647	0.000107181
FBgn0016119	3R:23355219-23356064	ATPsynCF6	151.681	159.921	147.071	0.00162737	1.35623	0.00725777
FBgn0016120	3R:19094999-19096271	ATPsynD	152.008	139.688	157.253	-0.371035	1.3633	0.00770626
FBgn0016122	2L:8521932-8528618	Acer	122.665	188.623	208.944	2.4555	0.551595	5.63721e-09
FBgn0016123	3R:31048928-31052540	Alp4	7.99613	16.1315	50.0961	0.423517	4.03807	2.40603e-11
FBgn0016126	4:445503-453947	CaMKI	11.1132	5.4422	17.5297	-1.64275	1.16394	0.542736
FBgn0016131	2R:16579469-16585448	Cdk4	1.28755	0.575324	0.781507	-0.791289	2.9267	8.14446e-06
FBgn0016641	2R:21619320-21624446	PTP-ER	20.1878	6.13158	6.29945	-0.820493	0.744209	0.0965851
FBgn0016650	3R:17725776-17733207	Lgr1	3.69469	2.95866	5.02693	-0.559265	0.478822	2.79005e-05
FBgn0016660	2L:5404279-5416593	H15	1.31996	2.04355	2.22772	-0.52171	0.75069	0.245157
FBgn0016672	3R:13958788-13960474	Ipp	42.1661	15.306	22.0283	-0.504297	1.43419	0.00205573
FBgn0016675	2L:19400752-19430270	Lectin-galC1	2.20815	0.820209	0	-0.370248	3.45447	0.0388127
FBgn0016684	2R:14842719-14845874	NaPi-T	2.37562	0	0.570263	-0.0902944	6.3385	NA
FBgn0016685	3R:30003680-30010352	Nlp	127.314	82.6677	59.638	-0.262091	1.08938	0.526791
FBgn0016687	2R:24558966-24561087	Nurf-38	117.072	69.1685	78.5807	0.250456	1.1688	0.240196
FBgn0016691	3R:15265590-15268538	ATPsynO	147.314	119.541	122.725	0.204066	0.960597	0.788721
FBgn0016693	3R:12695128-12704875	Past1	170.687	240.84	260.14	4.49787	0.829829	0.0876291
FBgn0016694	3L:7811457-7867369	Pdp1	7.52876	6.14361	15.0862	-0.914936	1.99415	3.41117e-05
FBgn0016696	3L:20771527-20778264	Pitslre	27.3992	17.6024	11.6152	-1.35082	1.1711	0.278425
FBgn0016697	2R:17412766-17413769	Prosalpha5	128.962	183.121	195.608	2.98257	0.815741	0.0544075
FBgn0016698	2L:3377001-3378590	Ptpa	75.8245	26.8212	26.5447	2.12143	1.04404	0.759707
FBgn0016700	3R:21266028-21269060	Rab1	68.0378	69.4309	79.0065	-1.00171	#N/A	#N/A
FBgn0016701	2R:17573461-17581525	Rab4	24.5601	17.5179	28.4428	-1.49767	0.907196	0.56346
FBgn0016715	3L:605164-606569	Reg-2	21.2962	11.6878	8.79058	-0.335782	2.01824	0.00152472
FBgn0016726	2R:21293767-21295588	RpL29	216.651	256.226	286.322	1.01023	1.85275	4.18508e-05
FBgn0016754	3R:23894173-23922973	sba	45.7679	18.5596	12.006	-0.150938	0.644148	0.0101724
FBgn0016756	3L:5752972-5761886	Usp47	123.551	181.833	199.907	1.42222	0.492073	1.88529e-07
FBgn0016762	2R:23688076-23697824	angel	44.3532	32.9926	31.9238	2.48132	0.718125	0.00494248
FBgn0016794	3L:2589413-2595590	dos	19.4339	9.0589	7.98164	-0.0394015	0.87557	0.539778
FBgn0016797	3L:19140974-19235373	fz2	21.4264	20.9713	23.4259	-0.824226	0.661329	0.0385908
FBgn0016917	3R:20535322-20552311	Stat92E	36.7193	31.2053	40.4036	-1.34234	1.03834	0.872342
FBgn0016919	2L:21578291-21589423	nompB	3.62223	4.83927	4.65807	0.033092	18.9973	6.27765e-12
FBgn0016920	2L:5346199-5365760	nompC	0.202305	0.121793	0.181793	-0.185695	0.755014	0.608574
FBgn0016926	2L:1114653-1128953	Pino	102.75	91.4107	76.0399	-0.611101	1.02333	0.858507
FBgn0016930	2L:14184477-14234126	Dyrk2	46.3063	38.968	36.8179	-0.747558	0.96304	0.860686
FBgn0016970	2R:9399079-9400329	l(2)k10201	85.3821	117.009	94.121	2.01291	1.4065	0.00783901
FBgn0016974	X:6361495-6363310	swaPsi	106.559	159.316	183.599	4.44742	1.047	0.758074
FBgn0016976	X:22980721-23004648	stnA	0.19392	0.310012	0.137326	-0.736318	#N/A	#N/A
FBgn0016977	2L:159031-203397	spen	23.3659	9.47552	8.38908	-1.44209	0.666611	0.0137006
FBgn0016978	2L:6968710-6971737	snRNP-U1-70K	54.6199	52.1471	44.4494	0.0536648	0.942028	0.628421
FBgn0016983	3L:7381613-7385637	smid	58.1391	20.8134	20.4453	-0.410245	0.950158	0.763746
FBgn0016984	2R:20821261-20836028	sktl	33.9084	38.3071	48.3014	-0.555573	0.921087	0.626126
FBgn0017414	2R:10886809-10894414	cag	41.5835	13.5725	9.90298	3.63966	0.265713	6.77541e-36
FBgn0017418	X:18130391-18137784	ari-1	44.5491	7.69908	9.38731	-1.51232	1.00535	0.985933
FBgn0017424	3L:12129102-12131869	CR11538	6.78517	6.4454	4.85659	5.19947	0.320304	0.000862021
FBgn0017429	3L:8602410-8604149	CG5989	68.5926	33.5478	24.4096	3.44843	0.856794	0.270449
FBgn0017430	3L:8576807-8600879	Nelf-E	97.7403	74.9127	33.0668	2.28304	1.14277	0.209054
FBgn0017448	3R:31755355-31758637	CG2187	3.00667	1.46226	2.01276	0.142343	1.85923	0.286986
FBgn0017456	3R:7518819-7519456	Ubc84D	150.891	253.235	246.977	5.17218	0.912641	0.568511
FBgn0017457	2L:292418-294681	U2af38	102.996	78.7461	50.2375	2.01726	0.907752	0.41228
FBgn0017482	2R:22329725-22332813	T3dh	2.24444	0.859156	1.81723	-0.566778	1.0966	0.792019
FBgn0017545	4:65224-67207	RpS3A	142.918	154.246	217.006	-0.841859	1.99088	7.2027e-07
FBgn0017550	3R:5607274-5613112	Rga	47.7107	13.9037	19.4142	-1.23207	0.979251	0.926629
FBgn0017551	2L:6852314-6853866	Rca1	81.2011	44.1561	15.3108	1.32364	1.06086	0.640378
FBgn0017556	2R:24500779-24502277	Prosalpha4T2	126.937	199.942	184.986	4.96327	0.961257	0.8039
FBgn0017558	2R:9426438-9434638	Pdk	3.7231	3.80414	3.98247	-1.5703	3.47775	1.90808e-08
FBgn0017561	X:10878053-10891250	Ork1	0	0.0963548	0	-0.711699	25.4303	2.33803e-18
FBgn0017566	X:8248650-8251687	ND-75	106.567	125.279	119.986	1.13387	0.636607	6.91404e-06
FBgn0017567	3R:15836047-15837117	ND-23	118.575	138.967	143.595	0.444065	1.00356	0.983769
FBgn0017572	3L:16613217-16615472	Mo25	80.9317	40.2826	37.64	-1.02784	1.08537	0.511104
FBgn0017577	3R:10788523-10791150	Mcm5	15.8006	4.57005	2.50411	-0.329289	0.886638	0.475414
FBgn0017578	3L:19261393-19268913	Max	61.197	63.9612	59.228	-0.516913	1.38017	0.00782452
FBgn0017579	3L:8601005-8602392	RpL14	149.068	153.415	207.977	-0.565524	1.80363	0.000106873
FBgn0017581	3R:11750930-11764457	Lk6	93.7327	66.6522	69.9162	-1.27034	0.83928	0.271429
FBgn0017590	3R:22899283-22961731	klg	0.312824	0.507791	0.539137	-0.59334	1.20126	0.776239
FBgn0019624	3R:11819358-11820299	COX5A	174.237	242.668	269.268	0.724847	1.2143	0.0641578
FBgn0019637	3R:5613279-5616308	Atu	36.0381	6.05374	8.20833	-0.246685	#N/A	#N/A
FBgn0019643	2R:24139562-24159312	Dat	5.87096	13.1049	29.688	-0.774219	2.83489	2.78818e-15
FBgn0019644	3L:9729998-9731224	ATPsynB	153.248	200.034	221.252	1.92155	0.951406	0.721757
FBgn0019650	4:989724-1007922	toy	0.735125	1.02948	0.640533	-0.827242	3.29579	0.000258382
FBgn0019660	X:11579064-11580432	roX2	2.7351	5.77327	7.70821	-0.41156	3.19017	1.02985e-07
FBgn0019661	X:3811697-3862697	roX1	12.419	8.60591	19.0743	-0.585351	2.2146	3.36338e-06
FBgn0019662	3L:7348312-7356713	qm	23.1711	13.4483	19.9089	-1.07583	0.989415	0.956497
FBgn0019686	2L:20061421-20065679	lok	25.9763	6.74851	4.25961	-0.254226	0.650552	0.00936198
FBgn0019809	2L:9608561-9612706	gcm2	1.00744	0.91372	1.89553	-0.320786	1.48762	0.465968
FBgn0019828	3R:7059314-7060524	dj	162.662	227.766	246.379	4.17927	0.863252	0.341297
FBgn0019830	2L:2767889-2770069	colt	82.8686	115.05	110.116	2.66521	1.16694	0.198316
FBgn0019886	2R:24509507-24515320	Letm1	101.477	155.165	165.974	-0.0431465	#N/A	#N/A
FBgn0019890	2L:13898827-13904661	Smg5	97.6769	72.5685	56.9122	-0.354789	0.815068	0.22916
FBgn0019925	3R:15343652-15346176	Surf4	71.32	27.1858	48.1795	-1.26805	2.82516	6.10665e-10
FBgn0019928	2R:13414977-13439051	Ser8	7.9967	9.40425	6.73528	0.099073	1.68154	0.0855513
FBgn0019929	X:9865232-9867070	Ser7	3.23059	4.30181	4.31304	-0.746663	1.55687	0.148057
FBgn0019932	2L:10339456-10341503	SamDC	83.582	69.3686	49.385	0.712501	0.997859	0.988054
FBgn0019936	3R:20822180-20824239	RpS20	146.898	152.095	187.919	-0.940505	1.65644	0.000601171
FBgn0019938	2R:14591202-14601216	RpI1	18.467	4.13215	4.19887	-0.392263	0.722194	0.0424734
FBgn0019940	3R:15483157-15484699	Rh6	1.31448	1.64967	0.597631	-0.57381	2.26201	0.0452901
FBgn0019947	3L:20432467-20436209	Psn	95.8738	79.134	66.8121	0.967426	#N/A	#N/A
FBgn0019948	2R:23978800-23988455	Phm	97.042	56.492	63.902	-0.332706	#N/A	#N/A
FBgn0019949	2R:22636062-22637727	Cdk9	65.6799	17.9479	18.6176	1.46087	0.8636	0.309602
FBgn0019952	3R:24276259-24278792	Orct	2.54283	3.35199	8.03479	-0.450798	6.59368	2.19192e-27
FBgn0019957	3R:22027708-22029393	ND-42	130.223	142.828	125.773	2.42524	0.904684	0.303245
FBgn0019960	3R:22019504-22023335	Mitofilin	125.162	193.491	205.135	4.44095	0.660016	0.000713033
FBgn0019968	2R:15515777-15532259	Khc-73	84.5426	54.956	28.9121	0.658019	0.67134	0.0191953
FBgn0019972	3R:29799657-29801584	Drice	12.1624	7.11413	6.54624	-0.665135	0.763424	0.0947495
FBgn0019982	2L:4454625-4456807	Gs1l	46.4839	10.6689	15.9752	-0.0547997	1.14715	0.492564
FBgn0019985	4:936818-949441	mGluR	0.267174	0.190249	0.365207	-0.736183	1.05749	0.889045
FBgn0019990	3R:31395659-31457873	Gcn2	39.4252	30.4819	29.0796	-0.319879	1.21963	0.322519
FBgn0020018	3R:24659620-24661851	Ppox	136.732	154.101	121.327	4.96048	0.767108	0.0056995
FBgn0020224	3L:8424953-8432246	Cbl	51.8514	29.422	21.0823	0.314692	0.847192	0.144583
FBgn0020235	3R:29747703-29749163	ATPsyngamma	130.007	81.8142	87.7092	-0.350735	1.33633	0.0257194
FBgn0020236	2R:15992407-16007667	ATPCL	63.8099	30.9963	38.982	-0.933136	0.916905	0.609938
FBgn0020238	3R:18242530-18250550	14-3-3epsilon	162.003	219.388	226.309	-0.727286	1.15594	0.132436
FBgn0020248	3L:1475437-1489547	stet	17.6913	6.07569	4.28705	0.127638	0.674417	0.0369768
FBgn0020249	3R:8356977-8362554	stck	34.3624	38.8793	53.8341	0.0279904	1.24592	0.0557301
FBgn0020251	3L:6495679-6550104	sfl	19.7652	12.7021	12.003	-1.48675	1.05449	0.775928
FBgn0020255	X:11144851-11148716	Ran	153.271	218.487	239.1	0.602157	0.988424	0.925901
FBgn0020257	2R:22684954-22688987	Ppa	1.27798	1.45594	2.28866	-0.934996	2.12573	0.00396855
FBgn0020258	2L:14378217-14381172	ppk	0.418692	0.160253	0.160203	-0.185695	0.961187	0.968154
FBgn0020261	X:19485758-19492011	pcm	61.0058	66.7154	71.2868	1.94511	0.587945	0.000149095
FBgn0020269	2R:14668390-14713622	mspo	0.355249	0.152785	0.256887	-0.676384	1.28447	0.65552
FBgn0020270	2L:11282089-11285706	mre11	21.0001	3.24675	2.56232	-0.292336	0.589725	0.00175368
FBgn0020272	X:21388976-21391533	mst	10.2653	6.65434	6.16011	-0.21987	1.49574	0.0240181
FBgn0020277	3L:19604397-19606090	lush	0.381317	0.565799	0	-0.267432	0.558079	0.298272
FBgn0020278	3R:22619967-22639387	loco	26.1693	15.1844	15.7706	-0.179981	1.06448	0.719013
FBgn0020279	2R:8067976-8078815	lig	103.391	85.2206	59.274	-0.563394	0.971441	0.884133
FBgn0020280	3R:4876004-4878533	laf	81.4026	89.08	72.6273	4.39827	0.644308	2.15776e-06
FBgn0020294	3L:21075580-21131159	ko	2.00546	2.21252	5.14156	-0.807413	1.47487	0.0419806
FBgn0020299	3R:14577216-14608079	stumps	4.17757	6.18637	6.16809	-0.993714	0.915576	0.643053
FBgn0020300	3L:18139401-18145418	geko	108.51	103.112	70.2493	4.65795	0.844376	0.105267
FBgn0020304	2L:833583-851163	drongo	71.2069	73.3963	74.6297	-0.831112	0.994888	0.976234
FBgn0020305	2L:868672-869857	dbe	40.3764	20.5267	14.9614	1.46815	1.27226	0.0477945
FBgn0020306	2R:21323429-21341847	dom	67.2516	36.8709	35.533	-0.558782	0.434316	1.96847e-06
FBgn0020307	2R:22243962-22286469	dve	1.88791	1.36786	1.98626	-1.02261	3.19905	1.15015e-05
FBgn0020309	2L:11794326-11809438	crol	32.5646	15.7443	13.8974	-1.15896	1.10709	0.647882
FBgn0020312	2R:21123734-21128510	CG4050	22.5023	5.08869	7.11347	-0.639758	0.917984	0.645858
FBgn0020369	X:21307585-21317663	Rpt6	114.323	107.26	110.125	0.539947	0.987633	0.931168
FBgn0020370	2R:13152884-13163948	TppII	67.8153	44.5554	42.5649	-0.058723	0.724142	0.0120127
FBgn0020371	2L:15484728-15485545	Tim17b2	151.924	232.443	227.745	4.49477	0.969562	0.851916
FBgn0020372	2R:23878196-23882927	TM4SF	5.0118	4.30325	3.46025	-0.639656	1.28509	0.284266
FBgn0020376	2L:4120342-4121627	Sr-CIII	0	0.872701	1.37323	na	2.50016	0.404836
FBgn0020377	2R:12208892-12212155	Sr-CII	15.283	14.1103	8.46742	2.89272	1.00666	0.984562
FBgn0020378	X:9729647-9756369	Sp1	0.921442	1.07507	0.408718	-0.589419	1.24421	0.63332
FBgn0020379	3R:10361759-10378068	Rfx	14.803	21.2349	17.0588	0.48588	0.714571	0.00430639
FBgn0020381	X:629772-635545	Dredd	13.0874	8.19942	15.151	-0.469859	1.29967	0.0832928
FBgn0020385	3R:10696533-10703316	pug	11.5321	12.8461	19.3757	-0.651799	1.09769	0.518596
FBgn0020386	3L:129449-145895	Pdk1	130.832	192.705	211.433	3.18673	0.583926	2.00398e-06
FBgn0020388	3L:12521128-12526731	Gcn5	16.7302	10.3857	10.2792	-0.452896	0.828497	0.110728
FBgn0020389	3L:19845292-19860925	Papss	4.23463	5.24398	9.59662	-1.4823	1.5975	0.00426455
FBgn0020391	2R:13152884-13163948	Nrk	2.91352	1.83183	0.888591	-0.492122	1.26178	0.33888
FBgn0020392	3L:8176134-8178429	Nmt	102.695	30.0037	33.8687	0.0742406	0.729013	0.0155542
FBgn0020399	3R:16267011-16272415	Mst89B	135.535	205.169	220.769	4.32558	0.985292	0.936426
FBgn0020407	3R:16264270-16266891	asun	15.403	10.6123	8.89899	0.05863	1.03283	0.863707
FBgn0020412	3L:11078751-11093193	JIL-1	77.9753	99.8863	97.1145	1.74198	0.661053	0.00215318
FBgn0020414	2L:16450906-16455194	Idgf3	56.4567	115.875	203.536	3.56726	0.740882	0.00206953
FBgn0020415	2L:16400174-16450508	Idgf2	9.66952	31.6035	51.1389	-0.855568	1.03527	0.856986
FBgn0020416	2L:16400174-16450508	Idgf1	2.71943	2.51815	3.13152	-0.702164	0.893534	0.76746
FBgn0020429	2L:5559341-5563502	GluRIIB	1.7265	2.35772	1.37619	-0.185695	2.49384	0.0787847
FBgn0020440	2R:19430658-19437259	Fak	22.006	5.97856	6.74614	-1.31346	0.865617	0.416372
FBgn0020443	2L:12431074-12441279	eRF3	96.4049	106.698	89.6151	-0.464881	1.09304	0.549147
FBgn0020445	2L:3334874-3354829	E23	1.73291	2.63473	2.73464	-0.56582	0.884926	0.577379
FBgn0020493	3R:17054006-17070408	Dad	4.93662	6.69285	7.36859	-1.78171	1.97967	3.57692e-06
FBgn0020496	3R:13011648-13026275	CtBP	61.8467	13.9151	20.1431	-1.34701	1.31792	0.11688
FBgn0020497	2L:8403446-8408853	emb	62.4125	12.6657	11.7252	-0.955735	0.733514	0.0847668
FBgn0020503	2L:17384699-17410406	CLIP-190	133.417	171.188	200.661	0.370941	0.724018	0.0291157
FBgn0020506	2R:16641242-16652699	Amyrel	0.213057	0	0	-0.324115	#N/A	#N/A
FBgn0020508	X:14782961-14784052	Ag5r2	0	0	4.25342	-0.32363	2.82296	0.251408
FBgn0020509	3L:2717614-2766536	Acp62F	107.622	100.653	33.2891	0.27048	23.7207	2.39268e-12
FBgn0020510	3R:14119261-14122420	Abi	70.682	31.1229	33.7356	-0.641317	1.10769	0.503625
FBgn0020513	X:12757035-12760617	ade5	16.1975	12.0352	13.1259	-0.758797	1.18111	0.518766
FBgn0020518	3L:22868379-22878984	snoRNA:Me28S-G764	0	0	0	-0.235588	#N/A	#N/A
FBgn0020521	2R:24581244-24597862	pio	2.38535	4.0775	4.25484	-0.866283	0.772267	0.413931
FBgn0020545	2L:852767-854539	kraken	135.872	112.644	83.7324	3.29881	0.864983	0.167339
FBgn0020546	3R:16831115-16923231	iab-4	0.203629	0.162837	0	na	1.29211	0.850779
FBgn0020556	3R:16742124-16773189	bxd	3.61777	0.737837	1.02122	na	1.32603	0.587249
FBgn0020616	2L:6950420-6956950	SA	35.3026	24.4828	22.1169	-1.06827	0.969868	0.8735
FBgn0020617	2R:20916752-20937030	Rx	0.297238	1.3699	0.236645	-0.623956	2.69619	0.0495301
FBgn0020618	2L:7821033-7827315	Rack1	148.915	115.264	180.942	-1.5494	2.07177	1.46713e-07
FBgn0020620	2R:13983394-13990707	RN-tre	76.1601	50.9317	47.2015	-0.674144	1.18485	0.303155
FBgn0020621	2R:9252020-9286634	Pkn	22.6274	26.9821	23.393	-1.4156	0.801188	0.181496
FBgn0020622	2L:297879-305233	Pi3K21B	29.619	20.9922	18.8794	-0.86032	0.813709	0.218602
FBgn0020626	3R:24932009-24938222	Osbp	75.7561	81.7249	90.8976	2.06362	0.883436	0.391698
FBgn0020633	3L:8891555-8894310	Mcm7	13.5541	11.0728	7.16742	-0.330515	0.727682	0.116955
FBgn0020637	3L:6132989-6133593	Lcp65Ag2	0	0.986219	0	-0.608733	0.0942315	0.154628
FBgn0020638	3L:6134696-6135274	Lcp65Ag1	0	0	0	-0.214945	#N/A	#N/A
FBgn0020639	3L:6136214-6136791	Lcp65Af	0	3.16249	1.79947	-0.267432	0.685948	0.52757
FBgn0020640	3L:6137582-6138118	Lcp65Ae	0	0	3.78984	na	0.345534	0.0398561
FBgn0020641	3L:6143394-6144101	Lcp65Ad	0	1.04811	2.18588	-0.147974	1.57092	0.635384
FBgn0020642	3L:6144818-6145393	Lcp65Ac	0	0	3.02248	-0.170221	1.17756	0.916213
FBgn0020643	3L:6146673-6147089	Lcp65Ab2	0	0	0	na	#N/A	#N/A
FBgn0020644	3L:6149547-6149960	Lcp65Ab1	0	0	0	na	#N/A	#N/A
FBgn0020645	3L:6151303-6151803	Lcp65Aa	0	0	0	-0.185695	#N/A	#N/A
FBgn0020646	3L:6148352-6148615	Lcp65APsi	0	0	0	na	#N/A	#N/A
FBgn0020647	3R:23995658-24031827	KrT95D	85.8042	106.921	97.1902	1.2589	0.710812	0.00565552
FBgn0020653	X:8241500-8248033	Trxr-1	135.959	156.91	136.649	1.6727	0.923923	0.422223
FBgn0020655	3L:12415025-12417580	ArfGAP1	60.2734	43.5713	39.4305	-0.129289	1.59189	0.00177492
FBgn0020660	3L:27842668-27858271	eIF4B	0	0	0	-0.88571	1.45918	0.0385908
FBgn0020762	2L:4333912-4345776	Atet	2.69726	3.86096	12.5726	-0.704894	0.935105	0.766332
FBgn0020764	2R:23964771-23966757	Alas	89.6764	112.998	120.407	0.517921	0.470782	1.05176e-15
FBgn0020765	3L:6152049-6152745	Acp65Aa	0	0	0	-0.247643	2.26511	0.494383
FBgn0020767	2R:14759645-14769423	Spred	69.9701	21.4588	16.0794	-0.592341	0.91904	0.54266
FBgn0020880	2L:7775803-7778029	CG7179	0	0	0	-0.237446	10.1587	0.00120155
FBgn0020887	3L:19918241-19923462	Su(z)12	48.3365	17.8865	10.6499	-0.331563	1.08277	0.69622
FBgn0020906	2L:4954278-4955144	Jon25Bi	0	0	76.7571	-0.380799	#N/A	#N/A
FBgn0020907	3R:16574542-16583663	Scp2	0.263957	0.391173	0	-0.859706	0.839666	0.956856
FBgn0020908	2R:2932594-2968052	Scp1	2.2137	0.535246	0	-0.275793	1.57587	0.191995
FBgn0020909	X:13757178-13758598	Rtc1	31.0553	10.4666	7.03372	0.635567	1.21193	0.18851
FBgn0020910	3R:11221893-11225173	RpL3	199.651	174.671	239.017	-1.80766	1.86185	8.79286e-06
FBgn0020912	3R:30912753-30930682	Ptx1	4.52967	7.04957	6.84948	-0.432572	0.964395	0.884133
FBgn0020930	2R:12757545-12760999	Dgkepsilon	82.1053	90.0542	85.5563	3.80052	0.865062	0.146463
FBgn0021738	X:3792973-3797339	Crg-1	0	0	0	-0.598293	0.923687	0.948947
FBgn0021742	X:10930839-10967134	C901	0.882196	0	0	-0.324634	4.71716	0.157044
FBgn0021750	3R:15333265-15343256	SerRS-m	34.1335	5.6863	4.29523	0.864005	0.889613	0.439111
FBgn0021760	3L:21172852-21183278	chb	134.775	195.779	215.594	4.16421	0.537073	0.000115016
FBgn0021761	2L:11004819-11011086	Nup154	31.6585	14.649	14.4094	-0.351123	0.997676	0.991836
FBgn0021764	X:686833-758719	sdk	12.5715	5.42983	6.00395	-0.824962	0.63588	0.0184181
FBgn0021765	X:18091258-18092853	scu	46.4298	39.3958	64.5123	-0.828992	1.30514	0.115913
FBgn0021767	X:8447690-8455069	org-1	1.10858	0.126768	0	-0.522897	2.1226	0.135826
FBgn0021768	3L:16787572-16829074	nudC	150.983	189.966	149.683	4.18488	0.92029	0.524379
FBgn0021776	3R:19929276-20008512	mira	0	0.134832	0	-0.312324	0.47371	0.368254
FBgn0021795	2R:11370299-11371335	Tapdelta	128.192	115.042	111.954	0.24353	1.49361	0.000903244
[truncated: 15,411 more rows]
