# Supplementary material for: The complex role of transcription factor GAGA in germline death during Drosophila spermatogenesis: transcriptomic and bioinformatic analyses
Source: PeerJ. 2023 Jan 9;11:e14063. doi: 10.7717/peerj.14063 (PMC9835689; doi:10.7717/peerj.14063)
Supplement: Table S4 [file peerj-11-14063-s010.xlsx]

## Sheet: summary chart-500
	All	testes up	testes down	developmental	spermatogenesis	male gamete generation	cell death	programmed cell death	apoptosis	antiapoptotic miRNA	autophagic cell death	autophagy	cellular responce to stress	lysosome	mitochondrion	respiratory chain complex	lncRNA
GAGA1 up500	0.809791	0.939639	0.877016	0.957379	0.522273	0.528011	0.748026	0.763942	0.84191	0.70028	0.362214	0.580634	0.650916	0.693674	0.564136	0.615912	0.775035
GAGA2 up500	0.743988	0.904214	0.764157	1.07234	0.506498	0.491196	0.80082	0.864886	0.894759	0.352361	0.65612	0.541821	0.603057	0.458734	0.521891	0.377297	0.693659

## Sheet: relative  chart 500
	All	testes up	testes down	developmental	spermatogenesis	male gamete generation	cell death	programmed cell death	apoptosis	antiapoptotic miRNA	autophagic cell death	autophagy	cellular responce to stress	lysosome	mitochondrion	respiratory chain complex	lncRNA
GAGA1 up500	1	1.16035	1.08302	1.18225	0.644948	0.652034	0.923727	0.943382	1.03966	0.864766	0.447293	0.717017	0.803807	0.856609	0.696644	0.760581	0.95708
GAGA2 up500	1	1.21536	1.02711	1.44133	0.680788	0.66022	1.07639	1.1625	1.20265	0.473611	0.881896	0.728266	0.810574	0.616588	0.701478	0.507128	0.932352
				18.05			14.81	18.71	13.42

## Sheet: apopt_GAF_-500
Fbgn	name	GAGA type	direction	sequence	description	process regulation	time of action	DEG FC	padj
FBgn0000014	abdominal A	GAGA type 1	direct	CGGGAAAGAGAGAGAGAACAGCGGC	abdominal A (abd-A) encodes a homeobox-containing transcription factor component of the bithorax complex. It contributes to the developmental fate of embryonic segments	positive	development	0.607925	0.000682644
FBgn0000014	abdominal A	GAGA type 1	indirect	GCTGCCTTTGAGTGAGCGTGTTTCA	abdominal A (abd-A) encodes a homeobox-containing transcription factor component of the bithorax complex. It contributes to the developmental fate of embryonic segments	positive	development	0.607925	0.000682644
FBgn0000014	abdominal A	GAGA type 2	direct	GAGCGGGAAAGAGAGAGAGAACAGCGGC	abdominal A (abd-A) encodes a homeobox-containing transcription factor component of the bithorax complex. It contributes to the developmental fate of embryonic segments	positive	development	0.607925	0.000682644
FBgn0000015	Abdominal B	GAGA type 2	direct	GTGTATTTCTGAGTGTGAGTGCGAGTGT	Abdominal B (Abd-B) is one of the three hox genes of the bithorax complex. The product of Abd-B specifies the identity of the posterior abdominal segments, the external genitalia and the gonads. It is also involved in regulating the post-mating-response, involved_in positive regulation of apoptotic process involved in morphogenesis	positive	development	2.68019	1.8931e-06
FBgn0000015	Abdominal B	GAGA type 2	direct	TTCTGAGTGTGAGTGCGAGTGTGAGTGT	Abdominal B (Abd-B) is one of the three hox genes of the bithorax complex. The product of Abd-B specifies the identity of the posterior abdominal segments, the external genitalia and the gonads. It is also involved in regulating the post-mating-response, involved_in positive regulation of apoptotic process involved in morphogenesis	positive	development	2.68019	1.8931e-06
FBgn0000015	Abdominal B	GAGA type 2	direct	GTGTGAGTGCGAGTGTGAGTGTGAGTGG	Abdominal B (Abd-B) is one of the three hox genes of the bithorax complex. The product of Abd-B specifies the identity of the posterior abdominal segments, the external genitalia and the gonads. It is also involved in regulating the post-mating-response, involved_in positive regulation of apoptotic process involved in morphogenesis	positive	development	2.68019	1.8931e-06
FBgn0000015	Abdominal B	GAGA type 2	direct	GTGCGAGTGTGAGTGTGAGTGGGCCATG	Abdominal B (Abd-B) is one of the three hox genes of the bithorax complex. The product of Abd-B specifies the identity of the posterior abdominal segments, the external genitalia and the gonads. It is also involved in regulating the post-mating-response, involved_in positive regulation of apoptotic process involved in morphogenesis	positive	development	2.68019	1.8931e-06
FBgn0028484	Ack	GAGA type 2	indirect	GTATTATTTTTCTTTAGAGAAGATAAAT	Non-receptor tyrosine-protein and serine/threonine-protein Activated Cdc42 kinase (Ack) is implicated in diverse biological functions such as cell survival, cell differentiation, cell growth and proliferation. Essential for male and female fertility (PubMed:22615583, PubMed:23562806). During oogenesis required for the correct temporal assembly, and consequently the catalytic activity of long CTPs…	negative	all	0.584048	2.79005e-05
FBgn0010379	Akt	GAGA type 1	indirect	GATGCCAGAGAGAGACATTATTTAA	Akt kinase (Akt) encodes the core kinase component of the insulin/insulin-like growth factor pathway. It functions downstream of the product of Pi3K92E and is activated by phosphatidylinositol binding and phosphorylation. It regulates cell growth and survival, stress responses and ageing.	negative	all	0.977849	0.877038
FBgn0004569	argos	GAGA type 1	indirect	CTGTGCACTGAGAGAAAATGCTCGA	Regulates cell determination; development of ommatidia and optic lobe. Is a signaling molecule involved in the process of axon pathfinding in the eye. Part of the Ras pathway regulating programmed cell death in pupal eyes; activated by lozenge (lz). Antagonist for the Egfr receptor (gurken). Inhibits Egfr signaling without interacting directly with the receptor, but instead by sequestering the Eg…	positive	development	1.15231	0.680746
FBgn0262451	bantam	GAGA type 1	indirect	GCGAAGAACGAGAGACTCAAAAGAT	Enables mRNA 3'-UTR binding activity and mRNA binding activity involved in posttranscriptional gene silencing. Involved in several processes, including positive regulation of cell population proliferation; regulation of gene expression; and regulation of signal transduction. involved in negative regulation of apoptotic process	negative	all	#N/A	#N/A
FBgn0037007	BNIP3	GAGA type 1	direct	GATCTTGTCGAGCGATTTAGTTACA	Predicted to be involved in mitochondrial outer membrane permeabilization and regulation of programmed cell death. Located in nucleus. Is expressed in several structures, including adult head; apoptotic amnioserosa; ectoderm; ectoderm anlage; and extended germ band embryo. Orthologous to several human genes including BNIP3 (BCL2 interacting protein 3)	positive	development	1.34479	0.0636345
FBgn0024250	brinker	GAGA type 1	indirect	CAGCAGTGGGAGAGAGAGTGAGAGG	brinker (brk) encodes a transcriptional repressor that plays important roles in the development of many tissues, including most imaginal discs, where its expression is negatively regulated by Dpp signaling. It is involved in the regulation of apoptotic process	positive	development	1.51995	0.413745
FBgn0024250	brinker	GAGA type 1	indirect	AGCAACAGAGAGAGAGCGCATGGCG	brinker (brk) encodes a transcriptional repressor that plays important roles in the development of many tissues, including most imaginal discs, where its expression is negatively regulated by Dpp signaling. It is involved in the regulation of apoptotic process	positive	development	1.51995	0.413745
FBgn0024250	brinker	GAGA type 2	indirect	GCAGCAGTGGGAGAGAGAGTGAGAGGGG	brinker (brk) encodes a transcriptional repressor that plays important roles in the development of many tissues, including most imaginal discs, where its expression is negatively regulated by Dpp signaling. It is involved in the regulation of apoptotic process	positive	development	1.51995	0.413745
FBgn0024250	brinker	GAGA type 2	indirect	CAGTGGGAGAGAGAGTGAGAGGGGGAGC	brinker (brk) encodes a transcriptional repressor that plays important roles in the development of many tissues, including most imaginal discs, where its expression is negatively regulated by Dpp signaling. It is involved in the regulation of apoptotic process	positive	development	1.51995	0.413745
FBgn0024250	brinker	GAGA type 2	indirect	GTGGGAGAGAGAGTGAGAGGGGGAGCTA	brinker (brk) encodes a transcriptional repressor that plays important roles in the development of many tissues, including most imaginal discs, where its expression is negatively regulated by Dpp signaling. It is involved in the regulation of apoptotic process	positive	development	1.51995	0.413745
FBgn0024250	brinker	GAGA type 2	indirect	GAGAGAGTGAGAGGGGGAGCTAGAGAGC	brinker (brk) encodes a transcriptional repressor that plays important roles in the development of many tissues, including most imaginal discs, where its expression is negatively regulated by Dpp signaling. It is involved in the regulation of apoptotic process	positive	development	1.51995	0.413745
FBgn0024250	brinker	GAGA type 2	indirect	GTGAGAGGGGGAGCTAGAGAGCGAGCAA	brinker (brk) encodes a transcriptional repressor that plays important roles in the development of many tissues, including most imaginal discs, where its expression is negatively regulated by Dpp signaling. It is involved in the regulation of apoptotic process	positive	development	1.51995	0.413745
FBgn0024250	brinker	GAGA type 2	indirect	GGGGGAGCTAGAGAGCGAGCAACAGAGA	brinker (brk) encodes a transcriptional repressor that plays important roles in the development of many tissues, including most imaginal discs, where its expression is negatively regulated by Dpp signaling. It is involved in the regulation of apoptotic process	positive	development	1.51995	0.413745
FBgn0024250	brinker	GAGA type 2	indirect	GCGAGCAACAGAGAGAGAGCGCATGGCG	brinker (brk) encodes a transcriptional repressor that plays important roles in the development of many tissues, including most imaginal discs, where its expression is negatively regulated by Dpp signaling. It is involved in the regulation of apoptotic process	positive	development	1.51995	0.413745
FBgn0040491	Buffy	GAGA type 1	indirect	AAGAAGTAGGAGTGAGGTTAACAAC	Buffy (Buffy) encodes one of the two Bcl-2 family members in Drosophila (the other being the product of Debcl). Its loss has been linked to altered energy metabolism in larvae.Predicted to enable protein heterodimerization activity and protein homodimerization activity. Involved in several processes, including ectopic germ cell programmed cell death; positive regulation of macroautophagy? responc…	negative	all	2.77638	1.90696e-08
FBgn0029093	cathepsin D	GAGA type 1	indirect	TTTTGATTAGAGAGATTCGATAGTT	cathD (cathD) encodes a protein involved in apoptosis and the defense response to Gram-negative bacteria. nurse cell apoptotic process	positive (non-apoptotic!)	development	1.07638	0.588749
FBgn0029093	cathepsin D	GAGA type 1	indirect	TTGTATTTTGAGCTTAAATGGTTCA	cathD (cathD) encodes a protein involved in apoptosis and the defense response to Gram-negative bacteria. nurse cell apoptotic process	positive (non-apoptotic!)	development	1.07638	0.588749
FBgn0029093	cathepsin D	GAGA type 1	direct	ACTATCGAATCTCTCTAATCAAAAC	cathD (cathD) encodes a protein involved in apoptosis and the defense response to Gram-negative bacteria. nurse cell apoptotic process	positive (non-apoptotic!)	development	1.07638	0.588749
FBgn0013762	Cdk5	GAGA type 1	indirect	AATGCAGCTGAGCGACAAGGATTTG	Cyclin-dependent kinase 5 (Cdk5) encodes a protein serine-threonine kinase of the cyclin-dependent kinase family whose activity is largely restricted to post-mitotic neurons. It is required for synaptic homeostasis and fidelity of axon patterning, and altered activity causes adult-onset neurodegeneration. involved_in intrinsic apoptotic signaling pathway in response to endoplasmic reticulum stress	positive	all	0.930606	0.655902
FBgn0033971	CG10209	GAGA type 1	indirect	ACCATCCTTGAGAGACACAATCAAG	CG10209 encodes a DNA binding nuclear apoptosis-inducing factor involved in the apoptotic process.	positive	all	0.93627	0.670077
FBgn0033985	CG10257	GAGA type 2	indirect	GTGTGGATATGAGGCTGAGTGTGTGTAC	Predicted to be involved in I-kappaB kinase/NF-kappaB signaling; negative regulation of extrinsic apoptotic signaling pathway via death domain receptors; and positive regulation of neurogenesis. Is expressed in eye.	negative	all, development	1.79844	0.518052
FBgn0036323	CG14118	GAGA type 1	direct	TTATTCTCAGAGAGATTACAAGACA	Predicted to enable endoribonuclease activity and single-stranded DNA endodeoxyribonuclease activity. Predicted to be involved in apoptotic DNA fragmentation. Predicted to be active in mitochondrial inner membrane and nucleus.	positive	all (execution)	0.308096	0.00207281
FBgn0036323	CG14118	GAGA type 1	direct	AAAACGAAAGAGAGAGCGAGAGAGA	Predicted to enable endoribonuclease activity and single-stranded DNA endodeoxyribonuclease activity. Predicted to be involved in apoptotic DNA fragmentation. Predicted to be active in mitochondrial inner membrane and nucleus.	positive	all (execution)	0.308096	0.00207281
FBgn0036323	CG14118	GAGA type 1	direct	AGAGAGAGCGAGAGAGAGAGAGAG	Predicted to enable endoribonuclease activity and single-stranded DNA endodeoxyribonuclease activity. Predicted to be involved in apoptotic DNA fragmentation. Predicted to be active in mitochondrial inner membrane and nucleus.	positive	all (execution)	0.308096	0.00207281
FBgn0036323	CG14118	GAGA type 1	direct	AGAGAGCGAGAGAGAGAGAGAGATG	Predicted to enable endoribonuclease activity and single-stranded DNA endodeoxyribonuclease activity. Predicted to be involved in apoptotic DNA fragmentation. Predicted to be active in mitochondrial inner membrane and nucleus.	positive	all (execution)	0.308096	0.00207281
FBgn0036323	CG14118	GAGA type 1	direct	AGCGAGAGAGAGAGAGAGATGTAA	Predicted to enable endoribonuclease activity and single-stranded DNA endodeoxyribonuclease activity. Predicted to be involved in apoptotic DNA fragmentation. Predicted to be active in mitochondrial inner membrane and nucleus.	positive	all (execution)	0.308096	0.00207281
FBgn0036323	CG14118	GAGA type 1	direct	AGAGAGAGAGAGAGATGTAAGATAC	Predicted to enable endoribonuclease activity and single-stranded DNA endodeoxyribonuclease activity. Predicted to be involved in apoptotic DNA fragmentation. Predicted to be active in mitochondrial inner membrane and nucleus.	positive	all (execution)	0.308096	0.00207281
FBgn0036323	CG14118	GAGA type 2	direct	AAACGAAAGAGAGAGCGAGAGAGAGAGA	Predicted to enable endoribonuclease activity and single-stranded DNA endodeoxyribonuclease activity. Predicted to be involved in apoptotic DNA fragmentation. Predicted to be active in mitochondrial inner membrane and nucleus.	positive	all (execution)	0.308096	0.00207281
FBgn0036323	CG14118	GAGA type 2	direct	ACGAAAGAGAGAGCGAGAGAGAGAGAGA	Predicted to enable endoribonuclease activity and single-stranded DNA endodeoxyribonuclease activity. Predicted to be involved in apoptotic DNA fragmentation. Predicted to be active in mitochondrial inner membrane and nucleus.	positive	all (execution)	0.308096	0.00207281
FBgn0036323	CG14118	GAGA type 2	direct	AAGAGAGAGCGAGAGAGAGAGAGAGATG	Predicted to enable endoribonuclease activity and single-stranded DNA endodeoxyribonuclease activity. Predicted to be involved in apoptotic DNA fragmentation. Predicted to be active in mitochondrial inner membrane and nucleus.	positive	all (execution)	0.308096	0.00207281
FBgn0036323	CG14118	GAGA type 2	direct	GAGAGAGCGAGAGAGAGAGAGAGATGTA	Predicted to enable endoribonuclease activity and single-stranded DNA endodeoxyribonuclease activity. Predicted to be involved in apoptotic DNA fragmentation. Predicted to be active in mitochondrial inner membrane and nucleus.	positive	all (execution)	0.308096	0.00207281
FBgn0036323	CG14118	GAGA type 2	direct	GAGAGCGAGAGAGAGAGAGAGATGTAAG	Predicted to enable endoribonuclease activity and single-stranded DNA endodeoxyribonuclease activity. Predicted to be involved in apoptotic DNA fragmentation. Predicted to be active in mitochondrial inner membrane and nucleus.	positive	all (execution)	0.308096	0.00207281
FBgn0036323	CG14118	GAGA type 2	direct	GAGCGAGAGAGAGAGAGAGATGTAAGAT	Predicted to enable endoribonuclease activity and single-stranded DNA endodeoxyribonuclease activity. Predicted to be involved in apoptotic DNA fragmentation. Predicted to be active in mitochondrial inner membrane and nucleus.	positive	all (execution)	0.308096	0.00207281
FBgn0040650	CG15456	GAGA type 1	direct	CGATATTCAGAGCGATAACGACAGC	Predicted to be involved in negative regulation of apoptotic process; positive regulation of filopodium assembly; and response to selenium ion. Predicted to be active in cytosol. Orthologous to human MIEN1 (migration and invasion enhancer 1).	negative	all	1.54067	0.0143319
FBgn0031384	CG4238	GAGA type 1	direct	GTGGAACCTGAGTGAAAATTTTTTA	Predicted to enable ubiquitin protein ligase activity. Predicted to be involved in cellular protein metabolic process; negative regulation of apoptotic process; and positive regulation of protein catabolic process. Predicted to be located in cytosol. Predicted to be active in cytoplasm. Is expressed in adult head. Orthologous to human AREL1 (apoptosis resistant E3 ubiquitin protein ligase 1)	negative	all	0.599519	1.3963e-06
FBgn0002174	CG5504	GAGA type 2	direct	TGAAGGCACTGAGCACTAGCACATACGG	May act as a tumor suppressor in larval imaginal disks	positive	all	0.684229	8.48623e-05
FBgn0036887	CG9231	GAGA type 1	indirect	GGTCACCCTGAGAGACGTTCACACT	Predicted to be involved in cellular response to hypoxia; positive regulation of apoptotic process; and positive regulation of release of cytochrome c from mitochondria. Predicted to be located in cytosol and mitochondrion. Is expressed in adult head; adult heart; embryonic/larval midgut; gastric caecum; and organism. Orthologous to several human genes including FAM162A (family with sequence simi…	positive	all	0.894838	0.343325
FBgn0036165	charybde	GAGA type 2	direct	AAACACTCAAGAGAGCGAGCCGCTCAAC	Inhibits cell growth by regulating the Tor pathway upstream of the Tsc1-Tsc2 complex and downstream of Akt1. Acts as cell death activator during head development. Involved in several processes, including head involution; regulation of TOR signaling; and response to oxidative stress. Predicted to be located in cytoplasm. Is expressed in several structures, including adult brain; ectoderm anlage; e…	positive	development	0.960447	0.87002
FBgn0036165	charybde	GAGA type 1	direct	CACTCAAGAGAGCGAGCCGCTCAAC	Inhibits cell growth by regulating the Tor pathway upstream of the Tsc1-Tsc2 complex and downstream of Akt1. Acts as cell death activator during head development. Involved in several processes, including head involution; regulation of TOR signaling; and response to oxidative stress. Predicted to be located in cytoplasm. Is expressed in several structures, including adult brain; ectoderm anlage; e…	positive	development	0.960447	0.87002
FBgn0023076	Clock	GAGA type 1	indirect	CAGAGGGTCTCTCTCGGATCGGATA	Circadian regulator that acts as a transcription factor and generates a rhythmic output with a period of about 24 hours. Oscillates in antiphase to the cycling observed for period (PER) and timeless (TIM).	negative	all	1.03974	0.864392
FBgn0023076	Clock	GAGA type 1	direct	GAGACCCCCGAGAGACCCTTATATC	Circadian regulator that acts as a transcription factor and generates a rhythmic output with a period of about 24 hours. Oscillates in antiphase to the cycling observed for period (PER) and timeless (TIM).	negative	all	1.03974	0.864392
FBgn0030028	Companion of reaper	GAGA type 1	indirect	TGGCAATTGGAGAGAGTAAAAAAGA	Companion of reaper (Corp) is a gene that is transcriptionally induced following DNA damage. It may function to inhibit the pro-apoptotic activity of the transcriptional factor encoded by p53.	negative	all	2.86234	8.14446e-06
FBgn0030028	Companion of reaper	GAGA type 2	direct	CATTCAATGTGAGCACGAGCGAACACAC	Companion of reaper (Corp) is a gene that is transcriptionally induced following DNA damage. It may function to inhibit the pro-apoptotic activity of the transcriptional factor encoded by p53.	negative	all	2.86234	8.14446e-06
FBgn0010382	Cyclin E	GAGA type 1	indirect	CGGCGCAAAGAGAGAGTCGGAGTTT	Essential for the control of the cell cycle at the G1/S (start) transition. Targeted by archipelago for degradation by the SFC ubiquitin ligase complex	positive	?	0.592354	5.09728e-06
FBgn0010382	Cyclin E	GAGA type 2	indirect	CGCAAAGAGAGAGTCGGAGTTTAGTGGC	Essential for the control of the cell cycle at the G1/S (start) transition. Targeted by archipelago for degradation by the SFC ubiquitin ligase complex	positive	?	0.592354	5.09728e-06
FBgn0028381	Decay	GAGA type 1	direct	GCGGCGAGCGAGAGAAGAATCCACC	Death executioner caspase related to Apopain/Yama (Decay) encodes one of the seven members of the caspase family of cysteine proteases. It has substrate specificity similar to the effector caspases encoded by Drice and Dcp-1. involved in the programmed cell death	positive	development (execution)	1.16404	0.792788
FBgn0028381	Decay	GAGA type 1	direct	GGCGAACGGGAGCGAGAGCTTTTTT	Death executioner caspase related to Apopain/Yama (Decay) encodes one of the seven members of the caspase family of cysteine proteases. It has substrate specificity similar to the effector caspases encoded by Drice and Dcp-1. involved in the programmed cell death	positive	development (execution)	1.16404	0.792788
FBgn0028381	Decay	GAGA type 2	direct	ATACCGCGGCGAGCGAGAGAAGAATCCA	Death executioner caspase related to Apopain/Yama (Decay) encodes one of the seven members of the caspase family of cysteine proteases. It has substrate specificity similar to the effector caspases encoded by Drice and Dcp-1. involved in the programmed cell death	positive	development (execution)	1.16404	0.792788
FBgn0028381	Decay	GAGA type 2	direct	AGGCGAACGGGAGCGAGAGCTTTTTTTT	Death executioner caspase related to Apopain/Yama (Decay) encodes one of the seven members of the caspase family of cysteine proteases. It has substrate specificity similar to the effector caspases encoded by Drice and Dcp-1. involved in the programmed cell death	positive	development (execution)	1.16404	0.792788
FBgn0267972	Derlin-1	GAGA type 1	direct	AAATGACTTGAGTTCTTTAAGAACA	Derlin-1 (Der-1) encodes a transmembrane protein in the endoplasmic reticulum (ER) that is required for the retro-translocation of misfolded ER proteins to the cytoplasm for ubiquitin-mediated protein degradation. This process is referred to as "ER-Associated Degradation". Involved in positive regulation of apoptotic process and response to endoplasmic reticulum stress.	positive	all	0.621279	2.75178e-06
FBgn0015247	Diap-2	GAGA type 2	indirect	GCGGGATATCGAGAATGAGACAGCATCC	Death-associated inhibitor of apoptosis 2 (Diap2) encodes a protein with ubiquitin E3-ligase activity that functions in the Imd pathway by conjugating the product of imd with K63-polyubiquitin chai	negative	all	0.938262	0.617858
FBgn0015664	Dref	GAGA type 1	direct	CCCCCGGCCGAGCGAGAAATTTCCC	DNA replication-related element factor (Dref) encodes a BED finger-type transcription factor that binds to the DRE sequence (TATCGATA). The Dref product is involved in tumor suppressor, TOR, JNK and EGFR signalling pathways. It also plays a role in chromatin organization including insulator function, chromatin remodeling, and telomere maintenance	positive	all	0.873749	0.515602
FBgn0024732	Drep1	GAGA type 1	direct	ATATTCAGCGAGAGAGAACGTGTTT	DNA fragmentation factor-related protein 1 (Drep1) encodes a protein that regulates apoptosis. Predicted to enable deoxyribonuclease inhibitor activity. Involved in negative regulation of apoptotic process and nurse cell apoptotic process.	negative	all	1.24961	0.308803
FBgn0024732	Drep1	GAGA type 1	direct	ATTCAGCGAGAGAGAACGTGTTTTT	DNA fragmentation factor-related protein 1 (Drep1) encodes a protein that regulates apoptosis. Predicted to enable deoxyribonuclease inhibitor activity. Involved in negative regulation of apoptotic process and nurse cell apoptotic process.	negative	all	1.24961	0.308803
FBgn0024732	Drep1	GAGA type 2	indirect	TTCGAACTGCGAGTGCTCGCTTTTAAAT	DNA fragmentation factor-related protein 1 (Drep1) encodes a protein that regulates apoptosis. Predicted to enable deoxyribonuclease inhibitor activity. Involved in negative regulation of apoptotic process and nurse cell apoptotic process.	negative	all	1.24961	0.308803
FBgn0028407	Drep3	GAGA type 1	indirect	AGAGGCAAAGAGAGAGAGAGAGAGA	DNA fragmentation factor-related protein 3 (Drep3) encodes a CIDE domain containing protein that can interact with the proteins encoded by Drep2 and Drep4 via CIDE-CIDE interaction. Predicted to be involved in regulation of apoptotic process.	negative	all	1.22925	0.114976
FBgn0028407	Drep3	GAGA type 1	indirect	AGGCAAAGAGAGAGAGAGAGAGAGA	DNA fragmentation factor-related protein 3 (Drep3) encodes a CIDE domain containing protein that can interact with the proteins encoded by Drep2 and Drep4 via CIDE-CIDE interaction. Predicted to be involved in regulation of apoptotic process.	negative	all	1.22925	0.114976
FBgn0028407	Drep3	GAGA type 1	indirect	GCAAAGAGAGAGAGAGAGAGAGAGA	DNA fragmentation factor-related protein 3 (Drep3) encodes a CIDE domain containing protein that can interact with the proteins encoded by Drep2 and Drep4 via CIDE-CIDE interaction. Predicted to be involved in regulation of apoptotic process.	negative	all	1.22925	0.114976
FBgn0028407	Drep3	GAGA type 1	indirect	AAAGAGAGAGAGAGAGAGAGAGAGC	DNA fragmentation factor-related protein 3 (Drep3) encodes a CIDE domain containing protein that can interact with the proteins encoded by Drep2 and Drep4 via CIDE-CIDE interaction. Predicted to be involved in regulation of apoptotic process.	negative	all	1.22925	0.114976
FBgn0028407	Drep3	GAGA type 1	indirect	AGAGAGAGAGAGAGAGAGAGCGAGC	DNA fragmentation factor-related protein 3 (Drep3) encodes a CIDE domain containing protein that can interact with the proteins encoded by Drep2 and Drep4 via CIDE-CIDE interaction. Predicted to be involved in regulation of apoptotic process.	negative	all	1.22925	0.114976
FBgn0028407	Drep3	GAGA type 1	indirect	AGAGAGAGAGAGCGAGCGCTCTGTT	DNA fragmentation factor-related protein 3 (Drep3) encodes a CIDE domain containing protein that can interact with the proteins encoded by Drep2 and Drep4 via CIDE-CIDE interaction. Predicted to be involved in regulation of apoptotic process.	negative	all	1.22925	0.114976
FBgn0028407	Drep3	GAGA type 2	indirect	GAGAGGCAAAGAGAGAGAGAGAGAGAGA	DNA fragmentation factor-related protein 3 (Drep3) encodes a CIDE domain containing protein that can interact with the proteins encoded by Drep2 and Drep4 via CIDE-CIDE interaction. Predicted to be involved in regulation of apoptotic process.	negative	all	1.22925	0.114976
FBgn0028407	Drep3	GAGA type 2	indirect	GAGGCAAAGAGAGAGAGAGAGAGAGAGA	DNA fragmentation factor-related protein 3 (Drep3) encodes a CIDE domain containing protein that can interact with the proteins encoded by Drep2 and Drep4 via CIDE-CIDE interaction. Predicted to be involved in regulation of apoptotic process.	negative	all	1.22925	0.114976
FBgn0028407	Drep3	GAGA type 2	indirect	GGCAAAGAGAGAGAGAGAGAGAGAGAGC	DNA fragmentation factor-related protein 3 (Drep3) encodes a CIDE domain containing protein that can interact with the proteins encoded by Drep2 and Drep4 via CIDE-CIDE interaction. Predicted to be involved in regulation of apoptotic process.	negative	all	1.22925	0.114976
FBgn0028407	Drep3	GAGA type 2	indirect	CAAAGAGAGAGAGAGAGAGAGAGAGCGA	DNA fragmentation factor-related protein 3 (Drep3) encodes a CIDE domain containing protein that can interact with the proteins encoded by Drep2 and Drep4 via CIDE-CIDE interaction. Predicted to be involved in regulation of apoptotic process.	negative	all	1.22925	0.114976
FBgn0028407	Drep3	GAGA type 2	indirect	AAGAGAGAGAGAGAGAGAGAGAGCGAGC	DNA fragmentation factor-related protein 3 (Drep3) encodes a CIDE domain containing protein that can interact with the proteins encoded by Drep2 and Drep4 via CIDE-CIDE interaction. Predicted to be involved in regulation of apoptotic process.	negative	all	1.22925	0.114976
FBgn0028407	Drep3	GAGA type 2	indirect	GAGAGAGAGAGAGAGAGAGAGCGAGCGC	DNA fragmentation factor-related protein 3 (Drep3) encodes a CIDE domain containing protein that can interact with the proteins encoded by Drep2 and Drep4 via CIDE-CIDE interaction. Predicted to be involved in regulation of apoptotic process.	negative	all	1.22925	0.114976
FBgn0028407	Drep3	GAGA type 2	indirect	GAGAGAGAGAGAGAGAGAGCGAGCGCTC	DNA fragmentation factor-related protein 3 (Drep3) encodes a CIDE domain containing protein that can interact with the proteins encoded by Drep2 and Drep4 via CIDE-CIDE interaction. Predicted to be involved in regulation of apoptotic process.	negative	all	1.22925	0.114976
FBgn0028407	Drep3	GAGA type 2	indirect	GAGAGAGAGAGAGAGCGAGCGCTCTGTT	DNA fragmentation factor-related protein 3 (Drep3) encodes a CIDE domain containing protein that can interact with the proteins encoded by Drep2 and Drep4 via CIDE-CIDE interaction. Predicted to be involved in regulation of apoptotic process.	negative	all	1.22925	0.114976
FBgn0283531	Duox	GAGA type 1	indirect	TCCGTGTTGGAGCTCGAATCGGTCC	Plays a role in innate immunity limiting microbial proliferation in the gut (PubMed:16272120, PubMed:25639794). Acts downstream of a hh-signaling pathway to induce the production of reactive oxygen species (ROS) in response to intestinal bacterial infection (PubMed:25639794). May generate antimicrobial oxidative burst through its peroxidase-like domain	negative	all	0.618829	0.0171167
FBgn0283531	Duox	GAGA type 1	direct	GACCGATTCGAGCTCCAACACGGAT	Plays a role in innate immunity limiting microbial proliferation in the gut (PubMed:16272120, PubMed:25639794). Acts downstream of a hh-signaling pathway to induce the production of reactive oxygen species (ROS) in response to intestinal bacterial infection (PubMed:25639794). May generate antimicrobial oxidative burst through its peroxidase-like domain	negative	all	0.618829	0.0171167
FBgn0283531	Duox	GAGA type 2	direct	GAGCCCCAAAGAGCGGGAGCGAGGCCAC	Plays a role in innate immunity limiting microbial proliferation in the gut (PubMed:16272120, PubMed:25639794). Acts downstream of a hh-signaling pathway to induce the production of reactive oxygen species (ROS) in response to intestinal bacterial infection (PubMed:25639794). May generate antimicrobial oxidative burst through its peroxidase-like domain	negative	all	0.618829	0.0171167
FBgn0263933	ebi	GAGA type 1	direct	ATGGACGAAGAGAGACGACAATTCG	ebi (ebi) encodes a nuclear-localized protein that regulates Egfr, Notch and Wg signaling pathways. ebi encoded product contributes to multiple processes including wing growth and eye development as well as regulation of transcription and innate immune response.	negative	development	0.820872	0.181483
FBgn0263933	ebi	GAGA type 2	indirect	AAGCTCCAGCGAGTTGGAGTTCCATAAA	ebi (ebi) encodes a nuclear-localized protein that regulates Egfr, Notch and Wg signaling pathways. ebi encoded product contributes to multiple processes including wing growth and eye development as well as regulation of transcription and innate immune response.	negative	development	0.820872	0.181483
FBgn0000546	Ecdysone receptor	GAGA type 2	direct	AAACTGCGTTGAGAGCGAGCCAAAGCGT	Ecdysone receptor (EcR) encodes a protein that interacts with the product of usp to form the nuclear ecdysone receptor heterodimer, which modulates, in conjunction with co-activators and co-repressors, the activities of hundreds of genes in a tissue- and stage-specific way. EcR is widely expressed in embryonic and larval tissues and in some adult tissues where its activities (modulated by the hor…	positive	all, development	0.962577	0.922007
FBgn0003731	Egfr	GAGA type 1	direct	TGCGAGCGAGAGAGAGAGAGCGAAG	Epidermal growth factor receptor (Egfr) encodes the transmembrane tyrosine kinase receptor for signaling ligands (encoded by grk, spi, vn, and Krn) in the TGFα family, which utilises the intracellular MAP kinase pathway. The product of Egfr contributes to growth regulation, cell survival and developmental patterning.	negative	all	0.698199	0.0636001
FBgn0003731	Egfr	GAGA type 1	direct	CGAGCGAGAGAGAGAGAGCGAAGTT	Epidermal growth factor receptor (Egfr) encodes the transmembrane tyrosine kinase receptor for signaling ligands (encoded by grk, spi, vn, and Krn) in the TGFα family, which utilises the intracellular MAP kinase pathway. The product of Egfr contributes to growth regulation, cell survival and developmental patterning.	negative	all	0.698199	0.0636001
FBgn0003731	Egfr	GAGA type 1	direct	AGCGAGAGAGAGAGAGCGAAGTTCG	Epidermal growth factor receptor (Egfr) encodes the transmembrane tyrosine kinase receptor for signaling ligands (encoded by grk, spi, vn, and Krn) in the TGFα family, which utilises the intracellular MAP kinase pathway. The product of Egfr contributes to growth regulation, cell survival and developmental patterning.	negative	all	0.698199	0.0636001
FBgn0003731	Egfr	GAGA type 1	direct	TCGAACATCGAGCGAAACGGGCAAA	Epidermal growth factor receptor (Egfr) encodes the transmembrane tyrosine kinase receptor for signaling ligands (encoded by grk, spi, vn, and Krn) in the TGFα family, which utilises the intracellular MAP kinase pathway. The product of Egfr contributes to growth regulation, cell survival and developmental patterning.	negative	all	0.698199	0.0636001
FBgn0003731	Egfr	GAGA type 2	direct	AACTTGTTGCGAGCGAGAGAGAGAGAGC	Epidermal growth factor receptor (Egfr) encodes the transmembrane tyrosine kinase receptor for signaling ligands (encoded by grk, spi, vn, and Krn) in the TGFα family, which utilises the intracellular MAP kinase pathway. The product of Egfr contributes to growth regulation, cell survival and developmental patterning.	negative	all	0.698199	0.0636001
FBgn0003731	Egfr	GAGA type 2	direct	TGTTGCGAGCGAGAGAGAGAGAGCGAAG	Epidermal growth factor receptor (Egfr) encodes the transmembrane tyrosine kinase receptor for signaling ligands (encoded by grk, spi, vn, and Krn) in the TGFα family, which utilises the intracellular MAP kinase pathway. The product of Egfr contributes to growth regulation, cell survival and developmental patterning.	negative	all	0.698199	0.0636001
FBgn0003731	Egfr	GAGA type 2	direct	TTGCGAGCGAGAGAGAGAGAGCGAAGTT	Epidermal growth factor receptor (Egfr) encodes the transmembrane tyrosine kinase receptor for signaling ligands (encoded by grk, spi, vn, and Krn) in the TGFα family, which utilises the intracellular MAP kinase pathway. The product of Egfr contributes to growth regulation, cell survival and developmental patterning.	negative	all	0.698199	0.0636001
FBgn0003731	Egfr	GAGA type 2	direct	GCGAGCGAGAGAGAGAGAGCGAAGTTCG	Epidermal growth factor receptor (Egfr) encodes the transmembrane tyrosine kinase receptor for signaling ligands (encoded by grk, spi, vn, and Krn) in the TGFα family, which utilises the intracellular MAP kinase pathway. The product of Egfr contributes to growth regulation, cell survival and developmental patterning.	negative	all	0.698199	0.0636001
FBgn0033483	eiger	GAGA type 2	indirect	GCAGGCAGGCGAGCAAGAGGGACAACGG	eiger (egr) encodes the TNF superfamily ligand that activates the intracellular JNK pathway through its receptor encoded by grnd or wgn. Its roles include cell death, tumor suppression, tumor promotion, growth regulation, host defense, pain sensitization, and nutrient response. cts upstream of with a positive effect on apoptotic process.	positive	all	1.91364	0.00456738
FBgn0033690	EndoG	GAGA type 1	indirect	AAGATATCCGAGCTCGAATAACTCG	Endonuclease G (EndoG) encodes an enzyme with endodeoxyribonuclease and endoribonuclease activity. It is involved in germ cell programmed cell death, mitochondrion inheritance and spermatid development.	positive	all (execution)	0.973272	0.912393
FBgn0033690	EndoG	GAGA type 1	direct	GAGTTATTCGAGCTCGGATATCTTG	Endonuclease G (EndoG) encodes an enzyme with endodeoxyribonuclease and endoribonuclease activity. It is involved in germ cell programmed cell death, mitochondrion inheritance and spermatid development.	positive	all (execution)	0.973272	0.912393
FBgn0000577	engrailed	GAGA type 2	direct	CGCCCCGTGAGAGAGGGAGAGCTTGCGC	engrailed (en) encodes a homeodomain-containing transcription factor that is essential for posterior compartment identity and for compartment boundary formation and maintenance. It positively regulates the hh gene and negatively regulates the Hedgehog targets encoded by ci, ptc and dpp	negative	development	2.59335	1.80287e-08
FBgn0000577	engrailed	GAGA type 2	direct	CCCCGTGAGAGAGGGAGAGCTTGCGCCT	engrailed (en) encodes a homeodomain-containing transcription factor that is essential for posterior compartment identity and for compartment boundary formation and maintenance. It positively regulates the hh gene and negatively regulates the Hedgehog targets encoded by ci, ptc and dpp	negative	development	2.59335	1.80287e-08
FBgn0000320	eya	GAGA type 1	indirect	GCGAGTTTTGAGTGAGTTTCCTCTG	eyes absent (eya) encodes a transcriptional cofactor that physically interacts with several other retinal determination proteins, including those encoded by ey, dac, and so. The product of eya regulates eye, gonad, and brain development as well as axon pathfinding.	negative	development	0.892344	0.44382
FBgn0000320	eya	GAGA type 1	indirect	GCCGCTTTTGAGTGAGTTTTCTCAG	eyes absent (eya) encodes a transcriptional cofactor that physically interacts with several other retinal determination proteins, including those encoded by ey, dac, and so. The product of eya regulates eye, gonad, and brain development as well as axon pathfinding.	negative	development	0.892344	0.44382
FBgn0000320	eya	GAGA type 2	direct	CCAAGCGTGCGAGCGAGAGCGCAGCGCT	eyes absent (eya) encodes a transcriptional cofactor that physically interacts with several other retinal determination proteins, including those encoded by ey, dac, and so. The product of eya regulates eye, gonad, and brain development as well as axon pathfinding.	negative	development	0.892344	0.44382
FBgn0001075	fat	GAGA type 1	indirect	GACTCTCCGGAGAGAGATACCTGTT	fat (ft) is a tumor suppressor gene that encodes a large cadherin family transmembrane protein. It functions in the Hippo signaling pathway (as a receptor) and the Dachsous-Fat planar cell polarity pathway (as a transmembrane component).	positive	all	3.69092	2.63927e-11
FBgn0001075	fat	GAGA type 2	indirect	GCTACGCAGAGAGATAGAGTTGGACTCT	fat (ft) is a tumor suppressor gene that encodes a large cadherin family transmembrane protein. It functions in the Hippo signaling pathway (as a receptor) and the Dachsous-Fat planar cell polarity pathway (as a transmembrane component).	positive	all	3.69092	2.63927e-11
FBgn0000659	fork head	GAGA type 2	direct	GGCCATTGGCGAGAACGAGTCGGAGCTG	fork head (fkh) encodes a winged-helix nuclear transcription factor most studied for its role in salivary gland formation, where it is required for salivary gland viability, invagination, and maintaining expression of other early-expressed salivary gland transcription factors. It works with the product of sage to activate expression of salivary gland specific gene products, such as secreted prote…	negative	development	2.81482	0.431859
FBgn0000659	fork head	GAGA type 2	direct	TGGCGAGAACGAGTCGGAGCTGGTGCTG	fork head (fkh) encodes a winged-helix nuclear transcription factor most studied for its role in salivary gland formation, where it is required for salivary gland viability, invagination, and maintaining expression of other early-expressed salivary gland transcription factors. It works with the product of sage to activate expression of salivary gland specific gene products, such as secreted prote…	negative	development	2.81482	0.431859
FBgn0259108	futsch	GAGA type 1	indirect	CGCCAGCCAGAGTGACGACATCGAA	futsch (futsch) encodes a microtubule binding protein involved in the formation of synaptic buttons at the neuromuscular junctions. Its expression levels are regulated by the product of TBPH to prevent synaptic defects	negative	development	0.581373	0.0179473
FBgn0015946	grim	GAGA type 1	indirect	AGAAGCGGTGAGAGACTCGGGAAAT	grim (grim) encodes a member of the inhibitor of apoptotic protein antagonists. In response to death signals, it induces apoptosis of cells in the central nervous system. It is important particularly for the apoptosis of specific juvenile neurons during metamorphosis	positive	all, development	#N/A	#N/A
FBgn0015946	grim	GAGA type 1	direct	ATTCACTGCGAGAGAGGAACTCGCT	grim (grim) encodes a member of the inhibitor of apoptotic protein antagonists. In response to death signals, it induces apoptosis of cells in the central nervous system. It is important particularly for the apoptosis of specific juvenile neurons during metamorphosis	positive	all, development	#N/A	#N/A
FBgn0025825	HDAC3	GAGA type 1	direct	ACATGCACAGAGAGACTTGTGAATT	Histone deacetylase 3 (HDAC3) encodes a histone deacetylase involved in chromatin silencing. It controls cell growth through apoptosis suppression by regulating transcription of hid.	negative	all	#N/A	#N/A
FBgn0003997	hid	GAGA type 1	direct	CATGTGCAGGAGAGGGAGCGAGAGA	Activator of apoptosis, with grim and rpr, that acts on the effector Dredd	positive	all	0.941146	0.784755
FBgn0003997	hid	GAGA type 1	direct	AGAGGGAGCGAGAGAGATTGCGATT	Activator of apoptosis, with grim and rpr, that acts on the effector Dredd	positive	all	0.941146	0.784755
FBgn0003997	hid	GAGA type 1	direct	AGGGAGCGAGAGAGATTGCGATTGC	Activator of apoptosis, with grim and rpr, that acts on the effector Dredd	positive	all	0.941146	0.784755
FBgn0003997	hid	GAGA type 2	indirect	ATAGCTGAGTGAGGAAGAGTATACTCGG	Activator of apoptosis, with grim and rpr, that acts on the effector Dredd	positive	all	0.941146	0.784755
FBgn0003997	hid	GAGA type 2	direct	GCATGTGCAGGAGAGGGAGCGAGAGAGA	Activator of apoptosis, with grim and rpr, that acts on the effector Dredd	positive	all	0.941146	0.784755
FBgn0003997	hid	GAGA type 2	direct	GCAGGAGAGGGAGCGAGAGAGATTGCGA	Activator of apoptosis, with grim and rpr, that acts on the effector Dredd	positive	all	0.941146	0.784755
FBgn0032525	Hsp60D	GAGA type 2	indirect	TAGATCAGCCGAGTTTGAGCTACGTGGA	Heat shock protein 60D (Hsp60D) encodes a protein involved in caspase-mediated apoptosis and polyQ-mediated neurodegeneration.	positive	all	0.847923	0.160799
FBgn0261984	Ire1	GAGA type 2	indirect	TCAAAGGACGGAGCAAGAGCTCCCAGGA	Inositol-requiring enzyme-1 (Ire1) encodes a transmembrane protein that mediates the unfolded protein response. Misfolded peptides in the endoplasmic reticulum activate the RNase activity of the product of Ire1, thereby promoting the cleavage of its downstream substrates, such as Xbp1 mRNA. The product of Ire1 is also required for photoreceptor differentiation	negative	all	0.917304	0.6926
FBgn0029800	lin-52	GAGA type 1	direct	GAGGTCGCGGAGAGGTTCGCGTTTC	lin-52 (lin-52) encodes a subunit of the MuvB core complex. The MuvB core binds to the oncoprotein encoded by Myb and the Rbf-E2f2-Dp tumor suppressor complex, thereby controlling the expression of many genes, including critical regulators of the cell cycle. Involved in compound eye development; negative regulation of execution phase of apoptosis;	negative	all (execution)	1.43486	0.0160972
FBgn0001234	lncRNA:Hsrω	GAGA type 1	indirect	TAAAAACAAGAGAGAGTTCTATAAT	Heat shock RNA ω (lncRNA:Hsrω) is a developmentally expressed and stress-inducible long non-coding RNA gene, producing multiple nuclear and cytoplasmic transcripts. The long nuclear transcripts, in association with various heterogeneous nuclear ribonucleoproteins (hnRNPs), organize nucleoplasmic omega speckles to regulate multiple cellular processes. It is involved in the biological process descr…	positive	all	3.3567	1.58172e-13
FBgn0283521	lola	GAGA type 2	indirect	TAGAACAAGTGAGTGCGAGCGAGATGGG	longitudinals lacking (lola) encodes a protein involved in Notch signaling, cell death, regulation of retrotransposons and expression of axon and dendrite patterning genes. It contributes to oogenesis, spermatogenesis, neural wiring, eye development and a variety of behaviors.	positive	development	1.09106	0.584294
FBgn0262429	mir-13a	GAGA type 2	indirect	GTGAGTGCACGAGTGAGAGAATCTGTGT	Enables mRNA 3'-UTR binding activity and mRNA binding activity involved in posttranscriptional gene silencing. Involved in gene silencing by miRNA and negative regulation of apoptotic process.	negative	all	#N/A	#N/A
FBgn0262447	mir-14	GAGA type 1	direct	AAAGAGAATGAGAGAGCGAAAAAGC	a cell death suppressor - regulates fat metabolism - regulates insulin production and metabolism through its target,	negative	all	#N/A	#N/A
FBgn0262447	mir-14	GAGA type 2	direct	CAAATCCAAAGAGAATGAGAGAGCGAAA	a cell death suppressor - regulates fat metabolism - regulates insulin production and metabolism through its target,	negative	all	#N/A	#N/A
FBgn0262371	mir-263b	GAGA type 2	direct	GGCTCGAATCGAGTGCTAGCGACAGGGA	Enables mRNA 3'-UTR binding activity and mRNA binding activity involved in posttranscriptional gene silencing. Involved in several processes, including positive regulation of locomotor rhythm; regulation of branching morphogenesis of a nerve; and sensory organ development. Is expressed in adult central nervous system; external sensory organ precursor cell; haltere; interommatidial bristle; and se…	negative	all	#N/A	#N/A
FBgn0262403	mir-278	GAGA type 1	indirect	CTGCGAAGTGAGAGAAGTAAATGAA	Involved in female germ-line stem cell asymmetric division and negative regulation of apoptotic process.	negative	all	#N/A	#N/A
FBgn0262377	mir-2a-1	GAGA type 1	indirect	TGACTGCGGGAGTTCAGAATTTTCA	Enables mRNA 3'-UTR binding activity and mRNA binding activity involved in posttranscriptional gene silencing. Involved in gene silencing by miRNA; negative regulation of apoptotic process; and negative regulation of translational initiation. Is expressed in embryonic epidermis; embryonic hindgut; and organism	negative	all	#N/A	#N/A
FBgn0262460	mir-2a-2	GAGA type 1	indirect	TGACTGCGGGAGTTCAGAA	Enables mRNA 3'-UTR binding activity and mRNA binding activity involved in posttranscriptional gene silencing. Involved in gene silencing by miRNA; negative regulation of apoptotic process; and negative regulation of translational initiation.	negative	all	#N/A	#N/A
FBgn0262397	mir-2c	GAGA type 2	indirect	GTGAGTGCACGAGTGAGAGAATCTGTGT	Enables mRNA 3'-UTR binding activity and mRNA binding activity involved in posttranscriptional gene silencing. Involved in gene silencing by miRNA; negative regulation of apoptotic process; and negative regulation of translational initiation. Is expressed in embryonic/larval brain and larval ventral nerve cord.	negative	all	#N/A	#N/A
FBgn0262464	mir-6-1	GAGA type 1	direct	TAAAGTTGCGAGTGAAAATTAAAAT	Enables mRNA 3'-UTR binding activity and mRNA binding activity involved in posttranscriptional gene silencing. Involved in gene silencing by miRNA and negative regulation of apoptotic process. Is expressed in dorsal ectoderm and organism.	negative	all	#N/A	#N/A
FBgn0262464	mir-6-1	GAGA type 2	indirect	ACCTTTCTTTGAAAAAGAGACCATACCG	Enables mRNA 3'-UTR binding activity and mRNA binding activity involved in posttranscriptional gene silencing. Involved in gene silencing by miRNA and negative regulation of apoptotic process. Is expressed in dorsal ectoderm and organism.	negative	all	#N/A	#N/A
FBgn0262410	mir-6-2	GAGA type 1	direct	TAAAGTTGCGAGTGAAAATTAAAAT	Enables mRNA 3'-UTR binding activity and mRNA binding activity involved in posttranscriptional gene silencing. Involved in gene silencing by miRNA and negative regulation of apoptotic process	negative	all	#N/A	#N/A
FBgn0039140	Mitochondrial Rho	GAGA type 2	direct	TTGAGCATTCGAGCACTCGAACTCGAAC	Mitochondrial Rho (Miro) encodes an atypical GTPase and Ca[2+] sensor on the outer mitochondrial membrane that is vital for mitochondrial homeostasis and microtubule-based mitochondrial transport. It mediates linkage to kinesin and dynein motors through interactions with Milton/TRAK adaptor proteins	positive	all	0.767658	0.0120951
FBgn0039140	Mitochondrial Rho	GAGA type 2	indirect	GCTCCAGTTCGAGTTCGAGTGCTCGAAT	Mitochondrial Rho (Miro) encodes an atypical GTPase and Ca[2+] sensor on the outer mitochondrial membrane that is vital for mitochondrial homeostasis and microtubule-based mitochondrial transport. It mediates linkage to kinesin and dynein motors through interactions with Milton/TRAK adaptor proteins	positive	all	0.767658	0.0120951
FBgn0039140	Mitochondrial Rho	GAGA type 2	indirect	GTTCGAGTTCGAGTGCTCGAATGCTC	Mitochondrial Rho (Miro) encodes an atypical GTPase and Ca[2+] sensor on the outer mitochondrial membrane that is vital for mitochondrial homeostasis and microtubule-based mitochondrial transport. It mediates linkage to kinesin and dynein motors through interactions with Milton/TRAK adaptor proteins	positive	all	0.767658	0.0120951
FBgn0026252	moleskin	GAGA type 1	indirect	GTTAAAGGCGAGCGAAGATCGCAAC	moleskin (msk) encodes an importin that contributes to protein import into the nucleus. It is involved in eye development, muscle attachment and wing cell fate specification. involved_in negative regulation of neuron apoptotic process	negative	development	0.775072	0.0395707
FBgn0036486	Msh6	GAGA type 1	direct	AACGGGCACGAGTTCCCTAAATATA	Msh6 (Msh6) encodes a heterodimer with the product of spel1 to detect base-base mismatches and small insertion/deletion loops. It then recruits the rest of the mismatch repair machinery.	positive	all	0.643198	0.00507397
FBgn0262656	myc	GAGA type 1	indirect	AGTGAAAGAGAGTGAGATTTTTGAG	Myc (Myc) encodes a transcription factor that is homologous to vertebrate Myc proto-oncogenes. It contributes to cell growth, cell competition and regenerative proliferation.	positive	all	0.635584	0.133503
FBgn0262656	myc	GAGA type 2	indirect	TTTTTTGAGTGAAAGAGAGTGAGATTTT	Myc (Myc) encodes a transcription factor that is homologous to vertebrate Myc proto-oncogenes. It contributes to cell growth, cell competition and regenerative proliferation.	activator	all	0.635584	0.133503
FBgn0262656	myc	GAGA type 2	indirect	TTGAGTGAAAGAGAGTGAGATTTTTGAG	Myc (Myc) encodes a transcription factor that is homologous to vertebrate Myc proto-oncogenes. It contributes to cell growth, cell competition and regenerative proliferation.	activator	all	0.635584	0.133503
FBgn0031043	Naa20A	GAGA type 1	direct	GAAGAAGAAGAGCGAGGACAGGACC	N(alpha)-acetyltransferase 20 A Predicted to enable peptide alpha-N-acetyltransferase activity. Involved in histone acetylation and negative regulation of neuron apoptotic process. Part of NatB complex.	negative	development	1.40635	0.0275725
FBgn0031043	Naa20A	GAGA type 2	direct	GCCTGCCGTTGAGACTGAGACTGTTCCA	N(alpha)-acetyltransferase 20 A Predicted to enable peptide alpha-N-acetyltransferase activity. Involved in histone acetylation and negative regulation of neuron apoptotic process. Part of NatB complex.	negative	development	1.40635	0.0275725
FBgn0002962	nanos	GAGA type 2	direct	GTTGCAAAACGAGCGCTCTTCGCCGGCG	nanos (nos) encodes an RNA-binding protein that forms part of a translational repressor complex. It functions as the localized determinant of abdominal segmentation. It contributes to germline development, germline stem cell renewal, and neuronal morphogenesis and function	negative	development	1.09746	0.70352
FBgn0261530	nbs	GAGA type 1	indirect	ACAAAGAAGGAGTGAGAATAATAGG	nbs (nbs) encodes a component of the conserved MRN complex, which plays an important role in the repair of DNA double strand breaks. The product of nbs is required to prevent chromosome breakage, interacts with the telomere capping complex and prevents telomeric fusions	negative	all	1.03336	0.8039
FBgn0261276	Optic atrophy 1	GAGA type 2	indirect	CTTAACTACATCTTAAGAGCTTTAAGTA	Optic atrophy 1 (Opa1) encodes a dynamin-related GTPase that mediates fusion of the inner membrane of mitochondria. It usually works with the product of Marf to coordinately fuse both mitochondrial membranes. The product of Opa1 activity is regulated by proteolytic processing. involved_in negative regulation of endoplasmic reticulum stress-induced intrinsic apoptotic signaling pathway	negative	all	0.981383	0.919174
FBgn0019952	Orct	GAGA type 1	direct	ATATATGGGGAGCTCATATATAATA	Organic cation transporter, Probably transports organic cations. Predicted to enable transmembrane transporter activity. Predicted to be involved in apoptotic process.	?	?	6.59368	2.19192e-27
FBgn0003892	patched	GAGA type 2	direct	CACGAAACAAGAGAGCGAGTGAGAGTAG	patched (ptc) is a segment polarity gene that encodes a 12-pass transmembrane protein involved in Hh signalling regulation. ptc product contributes to the binding, internalization and degradation of the ligand encoded by hh, limiting its activity spatial range. ptc product also represses the constitutive signaling activity of the transmembrane protein encoded by smo.	negative	development	1.35678	0.155524
FBgn0003892	patched	GAGA type 2	direct	ACAAGAGAGCGAGTGAGAGTAGGGAGAG	patched (ptc) is a segment polarity gene that encodes a 12-pass transmembrane protein involved in Hh signalling regulation. ptc product contributes to the binding, internalization and degradation of the ligand encoded by hh, limiting its activity spatial range. ptc product also represses the constitutive signaling activity of the transmembrane protein encoded by smo.	negative	development	1.35678	0.155524
FBgn0003892	patched	GAGA type 2	direct	CCCGCTGGGCAAGAGAGAGTGAGAGAGA	patched (ptc) is a segment polarity gene that encodes a 12-pass transmembrane protein involved in Hh signalling regulation. ptc product contributes to the binding, internalization and degradation of the ligand encoded by hh, limiting its activity spatial range. ptc product also represses the constitutive signaling activity of the transmembrane protein encoded by smo.	negative	development	1.35678	0.155524
FBgn0003892	patched	GAGA type 2	direct	CTGGGCAAGAGAGAGTGAGAGAGAGAAA	patched (ptc) is a segment polarity gene that encodes a 12-pass transmembrane protein involved in Hh signalling regulation. ptc product contributes to the binding, internalization and degradation of the ligand encoded by hh, limiting its activity spatial range. ptc product also represses the constitutive signaling activity of the transmembrane protein encoded by smo.	negative	development	1.35678	0.155524
FBgn0003892	patched	GAGA type 2	direct	GGGCAAGAGAGAGTGAGAGAGAGAAACA	patched (ptc) is a segment polarity gene that encodes a 12-pass transmembrane protein involved in Hh signalling regulation. ptc product contributes to the binding, internalization and degradation of the ligand encoded by hh, limiting its activity spatial range. ptc product also represses the constitutive signaling activity of the transmembrane protein encoded by smo.	negative	development	1.35678	0.155524
FBgn0003892	patched	GAGA type 2	direct	AAGAGAGAGTGAGAGAGAGAAACAGCGG	patched (ptc) is a segment polarity gene that encodes a 12-pass transmembrane protein involved in Hh signalling regulation. ptc product contributes to the binding, internalization and degradation of the ligand encoded by hh, limiting its activity spatial range. ptc product also represses the constitutive signaling activity of the transmembrane protein encoded by smo.	negative	development	1.35678	0.155524
FBgn0020386	Pdk1	GAGA type 2	indirect	AACTGGAAGAGAGATAGAGAGTTATGGG	Phosphoinositide-dependent kinase 1 Serine/threonine kinase required for embryonic development. Inhibits apoptosis. Acts in the insulin receptor transduction pathway which regulates cell growth and organ size, by phosphorylating and activating Akt1 and S6k. May be involved in axonal pathfinding and synaptogenesis, and in spermatogenesis.	negative	all	0.583926	2.00398e-06
FBgn0032749	Phlpp	GAGA type 2	indirect	TCATTGAAAAGAGGGTGAGTTTCAGCAA	PH domain leucine-rich repeat protein phosphatase (Phlpp) encodes an enzyme involved in apoptosis regulation and tumor growth suppression via dephosphorylation of the product of Akt.	positive	all	0.704644	0.0335377
FBgn0032749	Phlpp	GAGA type 2	indirect	TCCGATCAAAGAGCACGAGGGGCTCTCT	PH domain leucine-rich repeat protein phosphatase (Phlpp) encodes an enzyme involved in apoptosis regulation and tumor growth suppression via dephosphorylation of the product of Akt.	positive	all	0.704644	0.0335377
FBgn0029891	Pink1	GAGA type 1	direct	GCCAACAAGGAGAGGATCGACAAGA	PTEN-induced putative kinase 1 (Pink1) is the ortholog of human PINK1, a gene mutated in autosomal recessive Parkinson's disease. Pink1 encodes a mitochondrially targeted Ser-Thr kinase. It has been linked to a number of cellular functions including altering mitochondrial dynamics, the autophagic degradation of dysfunctional mitochondria, and the proper function of Complex I of the electron trans…	negative	all	0.753092	0.0220846
FBgn0013726	pnut	GAGA type 1	direct	AGCAAGTGTGAGAGAGAAGCGAAAG	peanut (pnut) encodes a protein that belongs to the septin family of polymerizing GTPases. Together with the products of Septin1 and Septin2, it forms the septin complex. It participates in cytokinesis and other processes that involve organization of the cell cortex.	positive	all	0.915141	0.638036
FBgn0013726	pnut	GAGA type 1	direct	CAAGTGTGAGAGAGAAGCGAAAGTC	peanut (pnut) encodes a protein that belongs to the septin family of polymerizing GTPases. Together with the products of Septin1 and Septin2, it forms the septin complex. It participates in cytokinesis and other processes that involve organization of the cell cortex.	positive	all	0.915141	0.638036
FBgn0013726	pnut	GAGA type 1	direct	GTTCTCAGCGAGAGAGATAAGCTCA	peanut (pnut) encodes a protein that belongs to the septin family of polymerizing GTPases. Together with the products of Septin1 and Septin2, it forms the septin complex. It participates in cytokinesis and other processes that involve organization of the cell cortex.	positive	all	0.915141	0.638036
FBgn0013726	pnut	GAGA type 1	direct	TCTCAGCGAGAGAGATAAGCTCAGC	peanut (pnut) encodes a protein that belongs to the septin family of polymerizing GTPases. Together with the products of Septin1 and Septin2, it forms the septin complex. It participates in cytokinesis and other processes that involve organization of the cell cortex.	positive	all	0.915141	0.638036
FBgn0013726	pnut	GAGA type 2	indirect	TTGTGACGCTGAGAACTCGACTTTCGCT	peanut (pnut) encodes a protein that belongs to the septin family of polymerizing GTPases. Together with the products of Septin1 and Septin2, it forms the septin complex. It participates in cytokinesis and other processes that involve organization of the cell cortex.	positive	all	0.915141	0.638036
FBgn0003118	pointed	GAGA type 1	direct	AGAGAAAGAGAGAGAGAAACGGAGA	pointed (pnt) encodes an ETS family transcriptional activator that functions downstream of Ras signaling. It is necessary and sufficient for triggering cellular senescence upon Ras activation, and by doing so suppresses Ras-driven tumor growth. involved_in negative regulation of apoptotic signaling pathway	negative	all	2.15694	0.000748938
FBgn0003118	pointed	GAGA type 1	direct	AGAAAGAGAGAGAGAAACGGAGAGA	pointed (pnt) encodes an ETS family transcriptional activator that functions downstream of Ras signaling. It is necessary and sufficient for triggering cellular senescence upon Ras activation, and by doing so suppresses Ras-driven tumor growth. involved_in negative regulation of apoptotic signaling pathway	negative	all	2.15694	0.000748938
FBgn0003118	pointed	GAGA type 2	direct	TAGCAGCGGAGAGAAAGAGAGAGAGAAA	pointed (pnt) encodes an ETS family transcriptional activator that functions downstream of Ras signaling. It is necessary and sufficient for triggering cellular senescence upon Ras activation, and by doing so suppresses Ras-driven tumor growth. involved_in negative regulation of apoptotic signaling pathway	negative	all	2.15694	0.000748938
FBgn0003118	pointed	GAGA type 2	direct	CGGAGAGAAAGAGAGAGAGAAACGGAGA	pointed (pnt) encodes an ETS family transcriptional activator that functions downstream of Ras signaling. It is necessary and sufficient for triggering cellular senescence upon Ras activation, and by doing so suppresses Ras-driven tumor growth. involved_in negative regulation of apoptotic signaling pathway	negative	all	2.15694	0.000748938
FBgn0038519	Prx3	GAGA type 1	direct	GGATTAAGAGAGCGATATATAAAAG	Peroxiredoxin 3 (Prx3) encodes an antioxidant protein involved in hydrogen peroxide catabolism and regulation of apoptosis.	negative	all	1.00362	0.986142
FBgn0243512	puckered	GAGA type 2	direct	CAAAAGGTTTGAGCCCGAGATAAAAGAA	puckered (puc) encodes a serine/threonine protein phosphatase that mediates a feedback loop that regulates the Jun-N-terminal kinase pathway	negative	development	1.10417	0.554475
FBgn0032006	Pvr	GAGA type 1	direct	AAACTAAACGAGAGATAAACTCCCT	PDGF- and VEGF-receptor related (Pvr) encodes a receptor tyrosine kinase activated by the binding of PDGF- and VEGF-related factors (encoded by Pvf1, Pvf2 or Pvf3). It is involved in cell migration regulation and it has been shown to activate the canonical Ras/Raf/MAP kinase (ERK) cascade, the PI3K kinase pathway, TORC1, Rho family small GTPases and the JNK cascade, in a context-dependent manner.	negative	all	0.745071	0.0967893
FBgn0030613	Rab3 GDP-GTP exchange factor	GAGA type 1	direct	TTGTTTTTAGAGAGATTTCTCCGAT	Rab3 GDP-GTP exchange factor (Rab3-GEF) encodes a guanine nucleotide exchange factor (GEF) for the small GTPase encoded by Rab3. They control synaptic development and function, including the regulation of active zone protein composition at the neuromuscular junction. cell death; regulation of programmed cell death;	positive	development	1.42461	0.227558
FBgn0030613	Rab3 GDP-GTP exchange factor	GAGA type 2	indirect	GCCCCTGCTCGAGCGCTAGTGCAATGTG	Rab3 GDP-GTP exchange factor (Rab3-GEF) encodes a guanine nucleotide exchange factor (GEF) for the small GTPase encoded by Rab3. They control synaptic development and function, including the regulation of active zone protein composition at the neuromuscular junction. cell death; regulation of programmed cell death;	positive	development	1.42461	0.227558
FBgn0030613	Rab3 GDP-GTP exchange factor	GAGA type 2	direct	AATATAATCTGAATGAGAGTTCGTGATA	Rab3 GDP-GTP exchange factor (Rab3-GEF) encodes a guanine nucleotide exchange factor (GEF) for the small GTPase encoded by Rab3. They control synaptic development and function, including the regulation of active zone protein composition at the neuromuscular junction. cell death; regulation of programmed cell death;	positive	development	1.42461	0.227558
FBgn0003079	Raf	GAGA type 2	indirect	ATGAACTACTGAGATCGAGATCGAGTTG	Raf oncogene (Raf) encodes a serine-threonine protein kinase that acts downstream of the product of ras. It activates the MEK/ERK pathway to regulate cell proliferation, differentiation and survival downstream of receptor tyrosine kinases such as those encoded by tor, Egfr, and sev	negative	all	0.866366	0.436234
FBgn0003079	Raf	GAGA type 2	indirect	TACTGAGATCGAGATCGAGTTGATGGCA	Raf oncogene (Raf) encodes a serine-threonine protein kinase that acts downstream of the product of ras. It activates the MEK/ERK pathway to regulate cell proliferation, differentiation and survival downstream of receptor tyrosine kinases such as those encoded by tor, Egfr, and sev	negative	all	0.866366	0.436234
FBgn0017579	RpL14	GAGA type 1	direct	AAGGTCAAGGAGCTCTCCGGCTCCG	Ribosomal protein L14 (RpL14) encodes a component of the large subunit of cytoplasmic ribosomes, which translate mRNAs encoded by the nuclear genome. RpL14 is haploinsufficient - heterozygous mutants display the 'Minute' phenotype, characterized by a slower developmental rate and small adult bristles. Involved in negative regulation of neuron apoptotic process.	negative	development	1.80363	0.000106873
FBgn0034763	RYBP	GAGA type 2	indirect	AATCTTTAAAGAGGATGAGACATGAAAT	Ring and YY1 Binding Protein (RYBP) encodes a ubiquitin interacting protein. It interacts with epigenetic regulators of the Polycomb and trithorax groups to control post-translational histone modifications. The product of RYBP is involved in regulation of the innate immune response and cell death/cell survival, and the control of morphogenesis	negative	all	0.917609	0.440463
FBgn0033784	SCCRO3	GAGA type 2	indirect	TGTGAGCGCCGAGTTTGAGCAAAGCTAA	Squamous cell carcinoma-related oncogene 3 (SCCRO3) encodes a protein involved in the regulation of protein neddylation. involved_in positive regulation of apoptotic process	positive	all	0.644693	5.68672e-05
FBgn0004170	scute	GAGA type 1	indirect	GAAACGGGCGAGAGAATCGGAGAGA	scute (sc) is a proneural gene of the achaete-scute complex. It encodes a transcription factor involved in nervous system development, Notch signalling and sex determination	negative	development	#N/A	#N/A
FBgn0004170	scute	GAGA type 1	indirect	AGAGAAAGAGAGAGAGAGAGTGACG	scute (sc) is a proneural gene of the achaete-scute complex. It encodes a transcription factor involved in nervous system development, Notch signalling and sex determination	negative	development	#N/A	#N/A
FBgn0004170	scute	GAGA type 1	indirect	AGAGAGAGAGAGTGACGGCAAGAGC	scute (sc) is a proneural gene of the achaete-scute complex. It encodes a transcription factor involved in nervous system development, Notch signalling and sex determination	negative	development	#N/A	#N/A
FBgn0004170	scute	GAGA type 1	direct	TGGACTGTCGAGTGAGAACAGTTTT	scute (sc) is a proneural gene of the achaete-scute complex. It encodes a transcription factor involved in nervous system development, Notch signalling and sex determination	negative	development	#N/A	#N/A
FBgn0004170	scute	GAGA type 1	indirect	AAGGTATCTGAGTGAGGGCTCTTTT	scute (sc) is a proneural gene of the achaete-scute complex. It encodes a transcription factor involved in nervous system development, Notch signalling and sex determination	negative	development	#N/A	#N/A
FBgn0004170	scute	GAGA type 2	indirect	GAGAATCGGAGAGAAAGAGAGAGAGAGA	scute (sc) is a proneural gene of the achaete-scute complex. It encodes a transcription factor involved in nervous system development, Notch signalling and sex determination	negative	development	#N/A	#N/A
FBgn0004170	scute	GAGA type 2	indirect	CGGAGAGAAAGAGAGAGAGAGAGTGACG	scute (sc) is a proneural gene of the achaete-scute complex. It encodes a transcription factor involved in nervous system development, Notch signalling and sex determination	negative	development	#N/A	#N/A
FBgn0004170	scute	GAGA type 2	indirect	GAGAGAAAGAGAGAGAGAGAGTGACGGC	scute (sc) is a proneural gene of the achaete-scute complex. It encodes a transcription factor involved in nervous system development, Notch signalling and sex determination	negative	development	#N/A	#N/A
FBgn0004170	scute	GAGA type 2	indirect	GAGAAAGAGAGAGAGAGAGTGACGGCAA	scute (sc) is a proneural gene of the achaete-scute complex. It encodes a transcription factor involved in nervous system development, Notch signalling and sex determination	negative	development	#N/A	#N/A
FBgn0004170	scute	GAGA type 2	indirect	GTATCTGAGTGAGGGCTCTTTTTGCTAC	scute (sc) is a proneural gene of the achaete-scute complex. It encodes a transcription factor involved in nervous system development, Notch signalling and sex determination	negative	development	#N/A	#N/A
FBgn0004170	scute	GAGA type 2	direct	TCGAGTACCTGAGACAGAGAAAGAGAGA	scute (sc) is a proneural gene of the achaete-scute complex. It encodes a transcription factor involved in nervous system development, Notch signalling and sex determination	negative	development	#N/A	#N/A
FBgn0004170	scute	GAGA type 2	direct	ACCTGAGACAGAGAAAGAGAGAGAGACT	scute (sc) is a proneural gene of the achaete-scute complex. It encodes a transcription factor involved in nervous system development, Notch signalling and sex determination	negative	development	#N/A	#N/A
FBgn0004170	scute	GAGA type 2	direct	GACAGAGAAAGAGAGAGAGACTACCTGT	scute (sc) is a proneural gene of the achaete-scute complex. It encodes a transcription factor involved in nervous system development, Notch signalling and sex determination	negative	development	#N/A	#N/A
FBgn0041094	scylla	GAGA type 1	indirect	CAAGAGCGCGAGAGAGAGGGATATA	Inhibits cell growth by regulating the Tor pathway upstream of the Tsc1-Tsc2 complex and downstream of Akt1. Acts as cell death activator during head development.	positive	development	1.24195	0.224516
FBgn0041094	scylla	GAGA type 1	indirect	AGAGCGCGAGAGAGAGGGATATAAC	Inhibits cell growth by regulating the Tor pathway upstream of the Tsc1-Tsc2 complex and downstream of Akt1. Acts as cell death activator during head development.	positive	development	1.24195	0.224516
FBgn0041094	scylla	GAGA type 1	indirect	CCCGAATTTGAGAGAAAACCACGAA	Inhibits cell growth by regulating the Tor pathway upstream of the Tsc1-Tsc2 complex and downstream of Akt1. Acts as cell death activator during head development.	positive	development	1.24195	0.224516
FBgn0041094	scylla	GAGA type 1	direct	AGCGCGCATGAGCGAGACGGCGGAC	Inhibits cell growth by regulating the Tor pathway upstream of the Tsc1-Tsc2 complex and downstream of Akt1. Acts as cell death activator during head development.	positive	development	1.24195	0.224516
FBgn0041094	scylla	GAGA type 2	indirect	GCCGGCGAAAGAGCACGAGAGCGCAAGA	Inhibits cell growth by regulating the Tor pathway upstream of the Tsc1-Tsc2 complex and downstream of Akt1. Acts as cell death activator during head development.	positive	development	1.24195	0.224516
FBgn0041094	scylla	GAGA type 2	indirect	AAGAGCGCAAGAGCGCGAGAGAGAGGGA	Inhibits cell growth by regulating the Tor pathway upstream of the Tsc1-Tsc2 complex and downstream of Akt1. Acts as cell death activator during head development.	positive	development	1.24195	0.224516
FBgn0041094	scylla	GAGA type 2	indirect	GCAAGAGCGCGAGAGAGAGGGATATAAC	Inhibits cell growth by regulating the Tor pathway upstream of the Tsc1-Tsc2 complex and downstream of Akt1. Acts as cell death activator during head development.	positive	development	1.24195	0.224516
FBgn0002573	sens	GAGA type 1	indirect	GTACAAATCGAGCTCTCTTTTTTTT	senseless (sens) encodes a transcription factor that stimulates expression of proneural gene expression. It regulates differentiation of the peripheral nervous system and the R8 photoreceptor.	negative	all	1.51539	0.00909059
FBgn0002573	sens	GAGA type 1	direct	AAAAAAAGAGAGCTCGATTTGTACC	senseless (sens) encodes a transcription factor that stimulates expression of proneural gene expression. It regulates differentiation of the peripheral nervous system and the R8 photoreceptor.	negative	all	1.51539	0.00909059
FBgn0002573	sens	GAGA type 2	indirect	GGTACAAATCGAGCTCTCTTTTTTTTAT	senseless (sens) encodes a transcription factor that stimulates expression of proneural gene expression. It regulates differentiation of the peripheral nervous system and the R8 photoreceptor.	negative	all	1.51539	0.00909059
FBgn0002573	sens	GAGA type 2	indirect	TGGTGGTGGCTCTCGAGAGCCCTGCAAT	senseless (sens) encodes a transcription factor that stimulates expression of proneural gene expression. It regulates differentiation of the peripheral nervous system and the R8 photoreceptor.	negative	all	1.51539	0.00909059
FBgn0002573	sens	GAGA type 2	direct	ATTGCAGGGCTCTCGAGAGCCACCACCA	senseless (sens) encodes a transcription factor that stimulates expression of proneural gene expression. It regulates differentiation of the peripheral nervous system and the R8 photoreceptor.	negative	all	1.51539	0.00909059
FBgn0036786	sickle	GAGA type 1	direct	AGGGCGACAGAGAGAGAGAGAGAAA	sickle (skl) encodes a member of the inhibitor of apoptotic protein antagonists. It is partially involved in the apoptosis of some larval neurons during metamorphosis	positive	all	#N/A	#N/A
FBgn0036786	sickle	GAGA type 1	direct	GGCGACAGAGAGAGAGAGAGAAAGA	sickle (skl) encodes a member of the inhibitor of apoptotic protein antagonists. It is partially involved in the apoptosis of some larval neurons during metamorphosis	positive	all	#N/A	#N/A
FBgn0036786	sickle	GAGA type 1	direct	CGACAGAGAGAGAGAGAGAAAGAGA	sickle (skl) encodes a member of the inhibitor of apoptotic protein antagonists. It is partially involved in the apoptosis of some larval neurons during metamorphosis	positive	all	#N/A	#N/A
FBgn0036786	sickle	GAGA type 1	direct	ACAGAGAGAGAGAGAGAAAGAGAGA	sickle (skl) encodes a member of the inhibitor of apoptotic protein antagonists. It is partially involved in the apoptosis of some larval neurons during metamorphosis	positive	all	#N/A	#N/A
FBgn0036786	sickle	GAGA type 1	direct	AGAGAGAAAGAGAGAGGTAGGAAAA	sickle (skl) encodes a member of the inhibitor of apoptotic protein antagonists. It is partially involved in the apoptosis of some larval neurons during metamorphosis	positive	all	#N/A	#N/A
FBgn0036786	sickle	GAGA type 2	direct	GAGGGCGACAGAGAGAGAGAGAGAAAGA	sickle (skl) encodes a member of the inhibitor of apoptotic protein antagonists. It is partially involved in the apoptosis of some larval neurons during metamorphosis	positive	all	#N/A	#N/A
FBgn0036786	sickle	GAGA type 2	direct	GGGCGACAGAGAGAGAGAGAGAAAGAGA	sickle (skl) encodes a member of the inhibitor of apoptotic protein antagonists. It is partially involved in the apoptosis of some larval neurons during metamorphosis	positive	all	#N/A	#N/A
FBgn0036786	sickle	GAGA type 2	direct	GCGACAGAGAGAGAGAGAGAAAGAGAGA	sickle (skl) encodes a member of the inhibitor of apoptotic protein antagonists. It is partially involved in the apoptosis of some larval neurons during metamorphosis	positive	all	#N/A	#N/A
FBgn0036786	sickle	GAGA type 2	direct	GAGAGAGAGAGAGAAAGAGAGAAAGAGA	sickle (skl) encodes a member of the inhibitor of apoptotic protein antagonists. It is partially involved in the apoptosis of some larval neurons during metamorphosis	positive	all	#N/A	#N/A
FBgn0036786	sickle	GAGA type 2	direct	GAGAGAAAGAGAGAAAGAGAGAGGTAGG	sickle (skl) encodes a member of the inhibitor of apoptotic protein antagonists. It is partially involved in the apoptosis of some larval neurons during metamorphosis	positive	all	#N/A	#N/A
FBgn0005613	Sox15	GAGA type 1	direct	AGTGAGACCGAGAGATCGCGAGAGT	Sox box protein 15 (Sox15) encodes a transcription factor that regulates cell proliferation and cell death in the wing disc	negative	development	0.971713	0.972772
FBgn0005613	Sox15	GAGA type 2	direct	TTCTGAAAGTGAGACCGAGAGATCGCGA	Sox box protein 15 (Sox15) encodes a transcription factor that regulates cell proliferation and cell death in the wing disc	negative	development	0.971713	0.972772
FBgn0033051	Strica	GAGA type 2	direct	ATAAAAGAGAGAGTAAGAGCGAACCATA	Ser/Thr-rich caspase (Strica) encodes a member of initiator caspases. It contributes, redundantly or cooperatively with the product of Dronc, to the apoptosis of selective larval neurons during metamorphosis and nurse cells during oogenesis, and competitive apoptosis of heterozygous mutant cells	positive	development	1.37503	0.293142
FBgn0003656	swiss cheese	GAGA type 1	indirect	AGCCCGCTAGAGTGACCATACAAAG	swiss cheese (sws) encodes a transmembrane protein that hydrolyzes phosphatidylcholine and binds to and inhibits the C3 catalytic subunit of protein kinase A. Its loss leads to neuronal and glial degeneration and apoptotic cell death.	negative	development	0.645031	0.00190395
FBgn0026323	Tak1	GAGA type 1	direct	GGGCGGGTAGAGAGAATTAAATAGA	TGF-β activated kinase 1 (Tak1) encodes a MAP kinase kinase kinase that functions downstream of the products of imd, Fadd and Diap2. It also functions upstream of the IKK complex in the Imd pathway, a pathway regulating the antibacterial response and other less characterized cellular processes. Upon activation the product of imd, the product of Tak1 can also activate the JNK pathway at the level …	positive	all	1.68856	0.00301259
FBgn0051682	Testis EndoG-Like 1	GAGA type 1	indirect	TGATCGGTAGAGTGATGAAAAAGTG	Predicted to enable endoribonuclease activity and single-stranded DNA endodeoxyribonuclease activity. Predicted to be involved in apoptotic DNA fragmentation. Predicted to be active in mitochondrial inner membrane and nucleus.	positive	all (execution)	0.870718	0.392212
FBgn0051679	Testis EndoG-Like 3	GAGA type 2	direct	GTGGGCCGTGGAGTACGAGATGATCGGA	Predicted to enable endoribonuclease activity and single-stranded DNA endodeoxyribonuclease activity. Predicted to be involved in apoptotic DNA fragmentation. Predicted to be active in mitochondrial inner membrane and nucleus. Orthologous to human ENDOG (endonuclease G).	positive	all (execution)	0.890444	0.410473
FBgn0051679	Testis EndoG-Like 3	GAGA type 2	direct	CGACATCCGGGAGATTGAGCACTACGCA	Predicted to enable endoribonuclease activity and single-stranded DNA endodeoxyribonuclease activity. Predicted to be involved in apoptotic DNA fragmentation. Predicted to be active in mitochondrial inner membrane and nucleus. Orthologous to human ENDOG (endonuclease G).	positive	all (execution)	0.890444	0.410473
FBgn0051679	Testis EndoG-Like 3	GAGA type 2	direct	TCGATGGTTTGAGAAGGAGTGCCCTATT	Predicted to enable endoribonuclease activity and single-stranded DNA endodeoxyribonuclease activity. Predicted to be involved in apoptotic DNA fragmentation. Predicted to be active in mitochondrial inner membrane and nucleus. Orthologous to human ENDOG (endonuclease G).	positive	all (execution)	0.890444	0.410473
FBgn0004436	Ubc6	GAGA type 1	indirect	TTTACAATTGAGCGACATGGCAAAA	Ubiquitin conjugating enzyme 6 (Ubc6) encodes an enzyme that acts together with E3 ubiquitin ligases to transfer ubiquitin to target proteins. involved_in negative regulation of intrinsic apoptotic signaling pathway in response to DNA damage by p53 class mediator	negative	all	1.05066	0.722041
FBgn0011739	warts	GAGA type 2	indirect	ACATTGTTTTGAGTAAGAATGAAAATAT	warts (wts) encodes a tumor suppressor kinase in the Hippo pathway involved in the control of tissue growth. It also plays a post-mitotic role in R8 photoreceptor cells where it antagonizes the product of melt to control the bistable choice of Rhodospin expression	positive	all	0.693348	0.0129969
miRNA
stress -related
DNA breaks

## Sheet: Cell death_GAF_-500
Fbgn	name	GAGA type	direction	sequence	description	process regulation	time of action	DEG FC	padj
FBgn0000014	abdominal A	GAGA type 1	direct	CGGGAAAGAGAGAGAGAACAGCGGC	abdominal A (abd-A) encodes a homeobox-containing transcription factor component of the bithorax complex. It contributes to the developmental fate of embryonic segments	positive	development	0.607925	0.000682644
FBgn0000014	abdominal A	GAGA type 1	indirect	GCTGCCTTTGAGTGAGCGTGTTTCA	abdominal A (abd-A) encodes a homeobox-containing transcription factor component of the bithorax complex. It contributes to the developmental fate of embryonic segments	positive	development	0.607925	0.000682644
FBgn0000014	abdominal A	GAGA type 2	direct	GAGCGGGAAAGAGAGAGAGAACAGCGGC	abdominal A (abd-A) encodes a homeobox-containing transcription factor component of the bithorax complex. It contributes to the developmental fate of embryonic segments	positive	development	0.607925	0.000682644
FBgn0000015	Abdominal B	GAGA type 2	direct	GTGTATTTCTGAGTGTGAGTGCGAGTGT	Abdominal B (Abd-B) is one of the three hox genes of the bithorax complex. The product of Abd-B specifies the identity of the posterior abdominal segments, the external genitalia and the gonads. It is also involved in regulating the post-mating-response, involved_in positive regulation of apoptotic process involved in morphogenesis	positive	development	2.68019	1.8931e-06
FBgn0000015	Abdominal B	GAGA type 2	direct	TTCTGAGTGTGAGTGCGAGTGTGAGTGT	Abdominal B (Abd-B) is one of the three hox genes of the bithorax complex. The product of Abd-B specifies the identity of the posterior abdominal segments, the external genitalia and the gonads. It is also involved in regulating the post-mating-response, involved_in positive regulation of apoptotic process involved in morphogenesis	positive	development	2.68019	1.8931e-06
FBgn0000015	Abdominal B	GAGA type 2	direct	GTGTGAGTGCGAGTGTGAGTGTGAGTGG	Abdominal B (Abd-B) is one of the three hox genes of the bithorax complex. The product of Abd-B specifies the identity of the posterior abdominal segments, the external genitalia and the gonads. It is also involved in regulating the post-mating-response, involved_in positive regulation of apoptotic process involved in morphogenesis	positive	development	2.68019	1.8931e-06
FBgn0000015	Abdominal B	GAGA type 2	direct	GTGCGAGTGTGAGTGTGAGTGGGCCATG	Abdominal B (Abd-B) is one of the three hox genes of the bithorax complex. The product of Abd-B specifies the identity of the posterior abdominal segments, the external genitalia and the gonads. It is also involved in regulating the post-mating-response, involved_in positive regulation of apoptotic process involved in morphogenesis	positive	development	2.68019	1.8931e-06
FBgn0028484	Ack	GAGA type 2	indirect	GTATTATTTTTCTTTAGAGAAGATAAAT	Non-receptor tyrosine-protein and serine/threonine-protein Activated Cdc42 kinase (Ack) is implicated in diverse biological functions such as cell survival, cell differentiation, cell growth and proliferation. Essential for male and female fertility (PubMed:22615583, PubMed:23562806). During oogenesis required for the correct temporal assembly, and consequently the catalytic activity of long CTPs…	negative	all	0.584048	2.79005e-05
FBgn0010379	Akt	GAGA type 1	indirect	GATGCCAGAGAGAGACATTATTTAA	Akt kinase (Akt) encodes the core kinase component of the insulin/insulin-like growth factor pathway. It functions downstream of the product of Pi3K92E and is activated by phosphatidylinositol binding and phosphorylation. It regulates cell growth and survival, stress responses and ageing.	negative	all	0.977849	0.877038
FBgn0012036	Aldh	GAGA type 1	indirect	ATAAAGTCAGAGCGAGATAGATAGA	Aldehyde dehydrogenase (Aldh) encodes an NAD[+] dependent mitochondrial aldehyde dehydrogenase. Its functions include detoxifying endogenous aldehydes generated by lipid peroxidation, and detoxifying acetaldehyde derived from dietary ethanol	negative	all	0.750772	0.0126795
FBgn0004569	argos	GAGA type 1	indirect	CTGTGCACTGAGAGAAAATGCTCGA	Regulates cell determination; development of ommatidia and optic lobe. Is a signaling molecule involved in the process of axon pathfinding in the eye. Part of the Ras pathway regulating programmed cell death in pupal eyes; activated by lozenge (lz). Antagonist for the Egfr receptor (gurken). Inhibits Egfr signaling without interacting directly with the receptor, but instead by sequestering the Eg…	positive	development	1.15231	0.680746
FBgn0036255	Atg12	GAGA type 2	indirect	CATCCTGCGCAAGAAAGAGCTACTACAG	Required for autophagy	positive	all	0.846004	0.338371
FBgn0035850	Atg18a	GAGA type 2	indirect	ACCGAATCGTGAGCACGAGCCAGCATAG	Autophagy-related 18a (Atg18a) encodes a protein that regulates autophagy by participating in isolation membrane elongation around cytoplasmic cargoes	positive	all	1.24612	0.095723
FBgn0264325	atg6	GAGA type 2	direct	CCAACCCCTTGAGTTCTCTCTTATCAGC	Autophagy-related 6 (Atg6) encodes a component of the Vps34 complex that is required for the formation of PI3P, and functions in vesicle trafficking including autophagy and endocytosis.	positive	all	1.01526	0.923954
FBgn0264325	atg6	GAGA type 1	indirect	AGTAAAAAAGAGAGAAATAACAGAA	Autophagy-related 6 (Atg6) encodes a component of the Vps34 complex that is required for the formation of PI3P, and functions in vesicle trafficking including autophagy and endocytosis.	positive	all	1.01526	0.923954
FBgn0041188	Atx2	GAGA type 1	direct	CTCATGATGGAGAGGAGATACAAAC	Ataxin-2 (Atx2) encodes the ortholog of human gene ATXN2, which is implicated in spinocerebellar ataxia 2. It contributes to eye development, circadian behaviour, and microRNA function.	positive	all	0.808677	0.160276
FBgn0026597	Axn	GAGA type 1	indirect	GTGCGGGTGGAGTTCCTCGGCGACC	Axin (Axn) encodes the key scaffolding protein for the canonical Wnt signalling pathway. In the absence of signal, it targets the product of arm for proteolysis inhibiting Wnt signalling. In the presence of signal, it forms a part of the membrane activation complex, disrupting the product of arm degradation. This pathway play roles in cell proliferation (imaginal disc), differentiation (embryonic…	positive	all	0.841702	0.404707
FBgn0032049	Bace	GAGA type 1	indirect	GGACATTTTGAGTGACTTTGATAGT	beta-site APP-cleaving enzyme (Bace) encodes an aspartic protease that cleaves amyloid precursor proteins. It contributes to glial cell survival and enhances neuronal degeneration caused by expression of Appl. In humans, Bace, together with the γ-secretase complex, generates the toxic Aβ peptide that accumulates in Alzheimer's disease. [	negative	all	#N/A	#N/A
FBgn0262451	bantam	GAGA type 1	indirect	GCGAAGAACGAGAGACTCAAAAGAT	Enables mRNA 3'-UTR binding activity and mRNA binding activity involved in posttranscriptional gene silencing. Involved in several processes, including positive regulation of cell population proliferation; regulation of gene expression; and regulation of signal transduction. involved in negative regulation of apoptotic process	negative	all	#N/A	#N/A
FBgn0000173	ben	GAGA type 2	direct	AAATTAAACTGAGAAGGAGGTGCAAACG	bendless (ben) encodes an E2 ubiquitin-conjugating enzyme. It plays essential roles in multiple processes such as synaptic growth and maturation, axon guidance, innate immunity, genomic integrity, tumor growth, cell invasion, apoptosis, long-term memory and escape response	positive	all	1.2536	0.0355685
FBgn0037007	BNIP3	GAGA type 1	direct	GATCTTGTCGAGCGATTTAGTTACA	Predicted to be involved in mitochondrial outer membrane permeabilization and regulation of programmed cell death. Located in nucleus. Is expressed in several structures, including adult head; apoptotic amnioserosa; ectoderm; ectoderm anlage; and extended germ band embryo. Orthologous to several human genes including BNIP3 (BCL2 interacting protein 3)	positive	development	1.34479	0.0636345
FBgn0024250	brinker	GAGA type 1	indirect	CAGCAGTGGGAGAGAGAGTGAGAGG	brinker (brk) encodes a transcriptional repressor that plays important roles in the development of many tissues, including most imaginal discs, where its expression is negatively regulated by Dpp signaling. It is involved in the regulation of apoptotic process	positive	development	1.51995	0.413745
FBgn0024250	brinker	GAGA type 1	indirect	AGCAACAGAGAGAGAGCGCATGGCG	brinker (brk) encodes a transcriptional repressor that plays important roles in the development of many tissues, including most imaginal discs, where its expression is negatively regulated by Dpp signaling. It is involved in the regulation of apoptotic process	positive	development	1.51995	0.413745
FBgn0024250	brinker	GAGA type 2	indirect	GCAGCAGTGGGAGAGAGAGTGAGAGGGG	brinker (brk) encodes a transcriptional repressor that plays important roles in the development of many tissues, including most imaginal discs, where its expression is negatively regulated by Dpp signaling. It is involved in the regulation of apoptotic process	positive	development	1.51995	0.413745
FBgn0024250	brinker	GAGA type 2	indirect	CAGTGGGAGAGAGAGTGAGAGGGGGAGC	brinker (brk) encodes a transcriptional repressor that plays important roles in the development of many tissues, including most imaginal discs, where its expression is negatively regulated by Dpp signaling. It is involved in the regulation of apoptotic process	positive	development	1.51995	0.413745
FBgn0024250	brinker	GAGA type 2	indirect	GTGGGAGAGAGAGTGAGAGGGGGAGCTA	brinker (brk) encodes a transcriptional repressor that plays important roles in the development of many tissues, including most imaginal discs, where its expression is negatively regulated by Dpp signaling. It is involved in the regulation of apoptotic process	positive	development	1.51995	0.413745
FBgn0024250	brinker	GAGA type 2	indirect	GAGAGAGTGAGAGGGGGAGCTAGAGAGC	brinker (brk) encodes a transcriptional repressor that plays important roles in the development of many tissues, including most imaginal discs, where its expression is negatively regulated by Dpp signaling. It is involved in the regulation of apoptotic process	positive	development	1.51995	0.413745
FBgn0024250	brinker	GAGA type 2	indirect	GTGAGAGGGGGAGCTAGAGAGCGAGCAA	brinker (brk) encodes a transcriptional repressor that plays important roles in the development of many tissues, including most imaginal discs, where its expression is negatively regulated by Dpp signaling. It is involved in the regulation of apoptotic process	positive	development	1.51995	0.413745
FBgn0024250	brinker	GAGA type 2	indirect	GGGGGAGCTAGAGAGCGAGCAACAGAGA	brinker (brk) encodes a transcriptional repressor that plays important roles in the development of many tissues, including most imaginal discs, where its expression is negatively regulated by Dpp signaling. It is involved in the regulation of apoptotic process	positive	development	1.51995	0.413745
FBgn0024250	brinker	GAGA type 2	indirect	GCGAGCAACAGAGAGAGAGCGCATGGCG	brinker (brk) encodes a transcriptional repressor that plays important roles in the development of many tissues, including most imaginal discs, where its expression is negatively regulated by Dpp signaling. It is involved in the regulation of apoptotic process	positive	development	1.51995	0.413745
FBgn0040491	Buffy	GAGA type 1	indirect	AAGAAGTAGGAGTGAGGTTAACAAC	Buffy (Buffy) encodes one of the two Bcl-2 family members in Drosophila (the other being the product of Debcl). Its loss has been linked to altered energy metabolism in larvae.Predicted to enable protein heterodimerization activity and protein homodimerization activity. Involved in several processes, including ectopic germ cell programmed cell death; positive regulation of macroautophagy? responc…	negative	all	2.77638	1.90696e-08
FBgn0000253	Cam	GAGA type 2	direct	TCGTTCTCGCGAGAGCGAGAGCGGTTAT	Calmodulin (Cam) encodes a Calcium-binding messenger protein. It acts as a part of the calcium signal transduction pathway and interacts with various target proteins such as kinases or phosphatases. It is involved in actin filament-based movement, mitotic spinde assembly, axon guidance, DNA damage response, autophagy, cell death, sensory perception, and muscle homeostasis	positive	all	1.05586	0.664022
FBgn0000253	Cam	GAGA type 2	direct	GTTCTCGCGAGAGCGAGAGCGGTTATTG	Calmodulin (Cam) encodes a Calcium-binding messenger protein. It acts as a part of the calcium signal transduction pathway and interacts with various target proteins such as kinases or phosphatases. It is involved in actin filament-based movement, mitotic spinde assembly, axon guidance, DNA damage response, autophagy, cell death, sensory perception, and muscle homeostasis	positive	all	1.05586	0.664022
FBgn0029093	cathepsin D	GAGA type 1	indirect	TTTTGATTAGAGAGATTCGATAGTT	cathD (cathD) encodes a protein involved in apoptosis and the defense response to Gram-negative bacteria. nurse cell apoptotic process	positive (non-apoptotic!)	development	1.07638	0.588749
FBgn0029093	cathepsin D	GAGA type 1	indirect	TTGTATTTTGAGCTTAAATGGTTCA	cathD (cathD) encodes a protein involved in apoptosis and the defense response to Gram-negative bacteria. nurse cell apoptotic process	positive (non-apoptotic!)	development	1.07638	0.588749
FBgn0029093	cathepsin D	GAGA type 1	direct	ACTATCGAATCTCTCTAATCAAAAC	cathD (cathD) encodes a protein involved in apoptosis and the defense response to Gram-negative bacteria. nurse cell apoptotic process	positive (non-apoptotic!)	development	1.07638	0.588749
FBgn0052183	Ccn	GAGA type 1	indirect	AGCACGAACGAGTGACAAAAACGAA	Predicted to enable heparin binding activity and integrin binding activity. Predicted to be involved in cell adhesion; negative regulation of cell death; and signal transduction. Predicted to be active in extracellular matrix. Human ortholog(s) of this gene implicated in progressive pseudorheumatoid arthropathy of childhood. Orthologous to several human genes including CCN2 (cellular communicatio…	negative	all	0.961787	0.934046
FBgn0263986	cd	GAGA type 1	direct	GAGAGCGTGGAGCTCGGCGATTTGC	cardinal (cd) encodes a phenoxazinone synthetase involved in the kynurenine pathway. It contributes to ommochrome biosynthesis, neuron death and siRNA-mediated gene silencing.	positive	all	0.792476	0.311384
FBgn0263986	cd	GAGA type 1	indirect	CAAATCGCCGAGCTCCACGCTCTCC	cardinal (cd) encodes a phenoxazinone synthetase involved in the kynurenine pathway. It contributes to ommochrome biosynthesis, neuron death and siRNA-mediated gene silencing.	positive	all	0.792476	0.311384
FBgn0013762	Cdk5	GAGA type 1	indirect	AATGCAGCTGAGCGACAAGGATTTG	Cyclin-dependent kinase 5 (Cdk5) encodes a protein serine-threonine kinase of the cyclin-dependent kinase family whose activity is largely restricted to post-mitotic neurons. It is required for synaptic homeostasis and fidelity of axon patterning, and altered activity causes adult-onset neurodegeneration. involved_in intrinsic apoptotic signaling pathway in response to endoplasmic reticulum stress	positive	all	0.930606	0.655902
FBgn0263237	Cdk7	GAGA type 1	direct	AATCGCATAGAGCGACTTCTTTAGC	Cyclin-dependent kinase 7 (Cdk7) encodes a serine/threonine protein kinase whose activity depends on the regulatory subunits encoded by CycH and Mat1. This trimeric Cdk complex activates other Cdks by phosphorylation in their T-loop and is called Cdk activating kinase (CAK). CAK can also be part of TFIIH, where the product of Cdk7 phosphorylates different transcription substrates (e.g. CTD of Pol…	positive	development	0.905629	0.59814
FBgn0033933	CG10104	GAGA type 1	indirect	CCTTTGAAGGAGCTCAAATTTATAA	Predicted to enable aspartic-type endopeptidase activity. Predicted to be involved in cell death. Predicted to be active in lysosome. Human ortholog(s) of this gene implicated in several diseases, including familial juvenile hyperuricemic nephropathy; hand, foot and mouth disease; hypertension (multiple); neuronal ceroid lipofuscinosis 10; and portal hypertension. Orthologous to several human gen…	negative	all	1.5	3.66186e-05
FBgn0033971	CG10209	GAGA type 1	indirect	ACCATCCTTGAGAGACACAATCAAG	CG10209 encodes a DNA binding nuclear apoptosis-inducing factor involved in the apoptotic process.	positive	all	0.93627	0.670077
FBgn0033985	CG10257	GAGA type 2	indirect	GTGTGGATATGAGGCTGAGTGTGTGTAC	Predicted to be involved in I-kappaB kinase/NF-kappaB signaling; negative regulation of extrinsic apoptotic signaling pathway via death domain receptors; and positive regulation of neurogenesis. Is expressed in eye.	negative	all, development	1.79844	0.518052
FBgn0036323	CG14118	GAGA type 1	direct	TTATTCTCAGAGAGATTACAAGACA	Predicted to enable endoribonuclease activity and single-stranded DNA endodeoxyribonuclease activity. Predicted to be involved in apoptotic DNA fragmentation. Predicted to be active in mitochondrial inner membrane and nucleus.	positive	all (execution)	0.308096	0.00207281
FBgn0036323	CG14118	GAGA type 1	direct	AAAACGAAAGAGAGAGCGAGAGAGA	Predicted to enable endoribonuclease activity and single-stranded DNA endodeoxyribonuclease activity. Predicted to be involved in apoptotic DNA fragmentation. Predicted to be active in mitochondrial inner membrane and nucleus.	positive	all (execution)	0.308096	0.00207281
FBgn0036323	CG14118	GAGA type 1	direct	AGAGAGAGCGAGAGAGAGAGAGAG	Predicted to enable endoribonuclease activity and single-stranded DNA endodeoxyribonuclease activity. Predicted to be involved in apoptotic DNA fragmentation. Predicted to be active in mitochondrial inner membrane and nucleus.	positive	all (execution)	0.308096	0.00207281
FBgn0036323	CG14118	GAGA type 1	direct	AGAGAGCGAGAGAGAGAGAGAGATG	Predicted to enable endoribonuclease activity and single-stranded DNA endodeoxyribonuclease activity. Predicted to be involved in apoptotic DNA fragmentation. Predicted to be active in mitochondrial inner membrane and nucleus.	positive	all (execution)	0.308096	0.00207281
FBgn0036323	CG14118	GAGA type 1	direct	AGCGAGAGAGAGAGAGAGATGTAA	Predicted to enable endoribonuclease activity and single-stranded DNA endodeoxyribonuclease activity. Predicted to be involved in apoptotic DNA fragmentation. Predicted to be active in mitochondrial inner membrane and nucleus.	positive	all (execution)	0.308096	0.00207281
FBgn0036323	CG14118	GAGA type 1	direct	AGAGAGAGAGAGAGATGTAAGATAC	Predicted to enable endoribonuclease activity and single-stranded DNA endodeoxyribonuclease activity. Predicted to be involved in apoptotic DNA fragmentation. Predicted to be active in mitochondrial inner membrane and nucleus.	positive	all (execution)	0.308096	0.00207281
FBgn0036323	CG14118	GAGA type 2	direct	AAACGAAAGAGAGAGCGAGAGAGAGAGA	Predicted to enable endoribonuclease activity and single-stranded DNA endodeoxyribonuclease activity. Predicted to be involved in apoptotic DNA fragmentation. Predicted to be active in mitochondrial inner membrane and nucleus.	positive	all (execution)	0.308096	0.00207281
FBgn0036323	CG14118	GAGA type 2	direct	ACGAAAGAGAGAGCGAGAGAGAGAGAGA	Predicted to enable endoribonuclease activity and single-stranded DNA endodeoxyribonuclease activity. Predicted to be involved in apoptotic DNA fragmentation. Predicted to be active in mitochondrial inner membrane and nucleus.	positive	all (execution)	0.308096	0.00207281
FBgn0036323	CG14118	GAGA type 2	direct	AAGAGAGAGCGAGAGAGAGAGAGAGATG	Predicted to enable endoribonuclease activity and single-stranded DNA endodeoxyribonuclease activity. Predicted to be involved in apoptotic DNA fragmentation. Predicted to be active in mitochondrial inner membrane and nucleus.	positive	all (execution)	0.308096	0.00207281
FBgn0036323	CG14118	GAGA type 2	direct	GAGAGAGCGAGAGAGAGAGAGAGATGTA	Predicted to enable endoribonuclease activity and single-stranded DNA endodeoxyribonuclease activity. Predicted to be involved in apoptotic DNA fragmentation. Predicted to be active in mitochondrial inner membrane and nucleus.	positive	all (execution)	0.308096	0.00207281
FBgn0036323	CG14118	GAGA type 2	direct	GAGAGCGAGAGAGAGAGAGAGATGTAAG	Predicted to enable endoribonuclease activity and single-stranded DNA endodeoxyribonuclease activity. Predicted to be involved in apoptotic DNA fragmentation. Predicted to be active in mitochondrial inner membrane and nucleus.	positive	all (execution)	0.308096	0.00207281
FBgn0036323	CG14118	GAGA type 2	direct	GAGCGAGAGAGAGAGAGAGATGTAAGAT	Predicted to enable endoribonuclease activity and single-stranded DNA endodeoxyribonuclease activity. Predicted to be involved in apoptotic DNA fragmentation. Predicted to be active in mitochondrial inner membrane and nucleus.	positive	all (execution)	0.308096	0.00207281
FBgn0040650	CG15456	GAGA type 1	direct	CGATATTCAGAGCGATAACGACAGC	Predicted to be involved in negative regulation of apoptotic process; positive regulation of filopodium assembly; and response to selenium ion. Predicted to be active in cytosol. Orthologous to human MIEN1 (migration and invasion enhancer 1).	negative	all	1.54067	0.0143319
FBgn0032304	CG17134	GAGA type 1	direct	GTGGGCAAGGAGAGAATTGGATTCG	Predicted to enable aspartic-type endopeptidase activity. Predicted to be involved in cell death. Predicted to be active in lysosome. Orthologous to several human genes including CTSE (cathepsin E); PGA4 (pepsinogen A4); and PGA5 (pepsinogen A5).	positive	all	1.11158	0.923022
FBgn0032304	CG17134	GAGA type 1	direct	ATATTTGCCGAGTTCTTTAATCTCT	Predicted to enable aspartic-type endopeptidase activity. Predicted to be involved in cell death. Predicted to be active in lysosome. Orthologous to several human genes including CTSE (cathepsin E); PGA4 (pepsinogen A4); and PGA5 (pepsinogen A5).	positive	all	1.11158	0.923022
FBgn0030163	CG1791	GAGA type 1	indirect	TAATCAATCGAGTGACCTTTGTTTC	Predicted to enable transmembrane receptor protein tyrosine kinase activator activity. Predicted to be involved in negative regulation of apoptotic process. Predicted to be active in collagen-containing extracellular matrix and extracellular space. Human ortholog(s) of this gene implicated in familial hypobetalipoproteinemia 2. Orthologous to human ANGPTL3 (angiopoietin like 3) and ANGPTL4 (angio…	negative	all	#N/A	#N/A
FBgn0031384	CG4238	GAGA type 1	direct	GTGGAACCTGAGTGAAAATTTTTTA	Predicted to enable ubiquitin protein ligase activity. Predicted to be involved in cellular protein metabolic process; negative regulation of apoptotic process; and positive regulation of protein catabolic process. Predicted to be located in cytosol. Predicted to be active in cytoplasm. Is expressed in adult head. Orthologous to human AREL1 (apoptosis resistant E3 ubiquitin protein ligase 1)	negative	all	0.599519	1.3963e-06
FBgn0002174	CG5504	GAGA type 2	direct	TGAAGGCACTGAGCACTAGCACATACGG	May act as a tumor suppressor in larval imaginal disks	positive	all	0.684229	8.48623e-05
FBgn0036887	CG9231	GAGA type 1	indirect	GGTCACCCTGAGAGACGTTCACACT	Predicted to be involved in cellular response to hypoxia; positive regulation of apoptotic process; and positive regulation of release of cytochrome c from mitochondria. Predicted to be located in cytosol and mitochondrion. Is expressed in adult head; adult heart; embryonic/larval midgut; gastric caecum; and organism. Orthologous to several human genes including FAM162A (family with sequence simi…	positive	all	0.894838	0.343325
FBgn0036165	charybde	GAGA type 2	direct	AAACACTCAAGAGAGCGAGCCGCTCAAC	Inhibits cell growth by regulating the Tor pathway upstream of the Tsc1-Tsc2 complex and downstream of Akt1. Acts as cell death activator during head development. Involved in several processes, including head involution; regulation of TOR signaling; and response to oxidative stress. Predicted to be located in cytoplasm. Is expressed in several structures, including adult brain; ectoderm anlage; e…	positive	development	0.960447	0.87002
FBgn0036165	charybde	GAGA type 1	direct	CACTCAAGAGAGCGAGCCGCTCAAC	Inhibits cell growth by regulating the Tor pathway upstream of the Tsc1-Tsc2 complex and downstream of Akt1. Acts as cell death activator during head development. Involved in several processes, including head involution; regulation of TOR signaling; and response to oxidative stress. Predicted to be located in cytoplasm. Is expressed in several structures, including adult brain; ectoderm anlage; e…	positive	development	0.960447	0.87002
FBgn0023076	Clock	GAGA type 1	indirect	CAGAGGGTCTCTCTCGGATCGGATA	Circadian regulator that acts as a transcription factor and generates a rhythmic output with a period of about 24 hours. Oscillates in antiphase to the cycling observed for period (PER) and timeless (TIM).	negative	all	1.03974	0.864392
FBgn0023076	Clock	GAGA type 1	direct	GAGACCCCCGAGAGACCCTTATATC	Circadian regulator that acts as a transcription factor and generates a rhythmic output with a period of about 24 hours. Oscillates in antiphase to the cycling observed for period (PER) and timeless (TIM).	negative	all	1.03974	0.864392
FBgn0030028	Companion of reaper	GAGA type 1	indirect	TGGCAATTGGAGAGAGTAAAAAAGA	Companion of reaper (Corp) is a gene that is transcriptionally induced following DNA damage. It may function to inhibit the pro-apoptotic activity of the transcriptional factor encoded by p53.	negative	all	2.86234	8.14446e-06
FBgn0030028	Companion of reaper	GAGA type 2	direct	CATTCAATGTGAGCACGAGCGAACACAC	Companion of reaper (Corp) is a gene that is transcriptionally induced following DNA damage. It may function to inhibit the pro-apoptotic activity of the transcriptional factor encoded by p53.	negative	all	2.86234	8.14446e-06
FBgn0030028	corp	GAGA type 1	indirect	TGGCAATTGGAGAGAGTAAAAAAGA	Companion of reaper (Corp) is a gene that is transcriptionally induced following DNA damage. It may function to inhibit the pro-apoptotic activity of the transcriptional factor encoded by p53	negative	all	2.86234	8.14446e-06
FBgn0010382	Cyclin E	GAGA type 1	indirect	CGGCGCAAAGAGAGAGTCGGAGTTT	Essential for the control of the cell cycle at the G1/S (start) transition. Targeted by archipelago for degradation by the SFC ubiquitin ligase complex	positive	?	0.592354	5.09728e-06
FBgn0010382	Cyclin E	GAGA type 2	indirect	CGCAAAGAGAGAGTCGGAGTTTAGTGGC	Essential for the control of the cell cycle at the G1/S (start) transition. Targeted by archipelago for degradation by the SFC ubiquitin ligase complex	positive	?	0.592354	5.09728e-06
FBgn0086907	Cytochrome c distal	GAGA type 2	direct	AATCGACGATGAGAAAGAGAGACTCGCA	Cytochrome c distal is a Electron carrier protein. The oxidized form of the cytochrome c heme group can accept an electron from the heme group of the cytochrome c1 subunit of cytochrome reductase. Cytochrome c then transfers this electron to the cytochrome oxidase complex, the final protein carrier in the mitochondrial electron-transport chain	positive	all	0.915856	0.590434
FBgn0086907	Cytochrome c distal	GAGA type 1	direct	GATGAGAAAGAGAGACTCGCAGGAA	Cytochrome c distal is a Electron carrier protein. The oxidized form of the cytochrome c heme group can accept an electron from the heme group of the cytochrome c1 subunit of cytochrome reductase. Cytochrome c then transfers this electron to the cytochrome oxidase complex, the final protein carrier in the mitochondrial electron-transport chain	positive	all	0.915856	0.590434
FBgn0028381	Decay	GAGA type 1	direct	GCGGCGAGCGAGAGAAGAATCCACC	Death executioner caspase related to Apopain/Yama (Decay) encodes one of the seven members of the caspase family of cysteine proteases. It has substrate specificity similar to the effector caspases encoded by Drice and Dcp-1. involved in the programmed cell death	positive	development (execution)	1.16404	0.792788
FBgn0028381	Decay	GAGA type 1	direct	GGCGAACGGGAGCGAGAGCTTTTTT	Death executioner caspase related to Apopain/Yama (Decay) encodes one of the seven members of the caspase family of cysteine proteases. It has substrate specificity similar to the effector caspases encoded by Drice and Dcp-1. involved in the programmed cell death	positive	development (execution)	1.16404	0.792788
FBgn0028381	Decay	GAGA type 2	direct	ATACCGCGGCGAGCGAGAGAAGAATCCA	Death executioner caspase related to Apopain/Yama (Decay) encodes one of the seven members of the caspase family of cysteine proteases. It has substrate specificity similar to the effector caspases encoded by Drice and Dcp-1. involved in the programmed cell death	positive	development (execution)	1.16404	0.792788
FBgn0028381	Decay	GAGA type 2	direct	AGGCGAACGGGAGCGAGAGCTTTTTTTT	Death executioner caspase related to Apopain/Yama (Decay) encodes one of the seven members of the caspase family of cysteine proteases. It has substrate specificity similar to the effector caspases encoded by Drice and Dcp-1. involved in the programmed cell death	positive	development (execution)	1.16404	0.792788
FBgn0267972	Derlin-1	GAGA type 1	direct	AAATGACTTGAGTTCTTTAAGAACA	Derlin-1 (Der-1) encodes a transmembrane protein in the endoplasmic reticulum (ER) that is required for the retro-translocation of misfolded ER proteins to the cytoplasm for ubiquitin-mediated protein degradation. This process is referred to as "ER-Associated Degradation". Involved in positive regulation of apoptotic process and response to endoplasmic reticulum stress.	positive	all	0.621279	2.75178e-06
FBgn0015247	Diap-2	GAGA type 2	indirect	GCGGGATATCGAGAATGAGACAGCATCC	Death-associated inhibitor of apoptosis 2 (Diap2) encodes a protein with ubiquitin E3-ligase activity that functions in the Imd pathway by conjugating the product of imd with K63-polyubiquitin chai	negative	all	0.938262	0.617858
FBgn0000463	Dl	GAGA type 2	direct	AGAGAAATGAGAGAGCGAGTACGTTTCG	AGAGAAATGAGAGAGCGAGTACGTTTCG	positive	development	0.941887	0.78877
FBgn0015664	Dref	GAGA type 1	direct	CCCCCGGCCGAGCGAGAAATTTCCC	DNA replication-related element factor (Dref) encodes a BED finger-type transcription factor that binds to the DRE sequence (TATCGATA). The Dref product is involved in tumor suppressor, TOR, JNK and EGFR signalling pathways. It also plays a role in chromatin organization including insulator function, chromatin remodeling, and telomere maintenance	positive	all	0.873749	0.515602
FBgn0024732	Drep1	GAGA type 1	direct	ATATTCAGCGAGAGAGAACGTGTTT	DNA fragmentation factor-related protein 1 (Drep1) encodes a protein that regulates apoptosis. Predicted to enable deoxyribonuclease inhibitor activity. Involved in negative regulation of apoptotic process and nurse cell apoptotic process.	negative	all	1.24961	0.308803
FBgn0024732	Drep1	GAGA type 1	direct	ATTCAGCGAGAGAGAACGTGTTTTT	DNA fragmentation factor-related protein 1 (Drep1) encodes a protein that regulates apoptosis. Predicted to enable deoxyribonuclease inhibitor activity. Involved in negative regulation of apoptotic process and nurse cell apoptotic process.	negative	all	1.24961	0.308803
FBgn0024732	Drep1	GAGA type 2	indirect	TTCGAACTGCGAGTGCTCGCTTTTAAAT	DNA fragmentation factor-related protein 1 (Drep1) encodes a protein that regulates apoptosis. Predicted to enable deoxyribonuclease inhibitor activity. Involved in negative regulation of apoptotic process and nurse cell apoptotic process.	negative	all	1.24961	0.308803
FBgn0028407	Drep3	GAGA type 1	indirect	AGAGGCAAAGAGAGAGAGAGAGAGA	DNA fragmentation factor-related protein 3 (Drep3) encodes a CIDE domain containing protein that can interact with the proteins encoded by Drep2 and Drep4 via CIDE-CIDE interaction. Predicted to be involved in regulation of apoptotic process.	negative	all	1.22925	0.114976
FBgn0028407	Drep3	GAGA type 1	indirect	AGGCAAAGAGAGAGAGAGAGAGAGA	DNA fragmentation factor-related protein 3 (Drep3) encodes a CIDE domain containing protein that can interact with the proteins encoded by Drep2 and Drep4 via CIDE-CIDE interaction. Predicted to be involved in regulation of apoptotic process.	negative	all	1.22925	0.114976
FBgn0028407	Drep3	GAGA type 1	indirect	GCAAAGAGAGAGAGAGAGAGAGAGA	DNA fragmentation factor-related protein 3 (Drep3) encodes a CIDE domain containing protein that can interact with the proteins encoded by Drep2 and Drep4 via CIDE-CIDE interaction. Predicted to be involved in regulation of apoptotic process.	negative	all	1.22925	0.114976
FBgn0028407	Drep3	GAGA type 1	indirect	AAAGAGAGAGAGAGAGAGAGAGAGC	DNA fragmentation factor-related protein 3 (Drep3) encodes a CIDE domain containing protein that can interact with the proteins encoded by Drep2 and Drep4 via CIDE-CIDE interaction. Predicted to be involved in regulation of apoptotic process.	negative	all	1.22925	0.114976
FBgn0028407	Drep3	GAGA type 1	indirect	AGAGAGAGAGAGAGAGAGAGCGAGC	DNA fragmentation factor-related protein 3 (Drep3) encodes a CIDE domain containing protein that can interact with the proteins encoded by Drep2 and Drep4 via CIDE-CIDE interaction. Predicted to be involved in regulation of apoptotic process.	negative	all	1.22925	0.114976
FBgn0028407	Drep3	GAGA type 1	indirect	AGAGAGAGAGAGCGAGCGCTCTGTT	DNA fragmentation factor-related protein 3 (Drep3) encodes a CIDE domain containing protein that can interact with the proteins encoded by Drep2 and Drep4 via CIDE-CIDE interaction. Predicted to be involved in regulation of apoptotic process.	negative	all	1.22925	0.114976
FBgn0028407	Drep3	GAGA type 2	indirect	GAGAGGCAAAGAGAGAGAGAGAGAGAGA	DNA fragmentation factor-related protein 3 (Drep3) encodes a CIDE domain containing protein that can interact with the proteins encoded by Drep2 and Drep4 via CIDE-CIDE interaction. Predicted to be involved in regulation of apoptotic process.	negative	all	1.22925	0.114976
FBgn0028407	Drep3	GAGA type 2	indirect	GAGGCAAAGAGAGAGAGAGAGAGAGAGA	DNA fragmentation factor-related protein 3 (Drep3) encodes a CIDE domain containing protein that can interact with the proteins encoded by Drep2 and Drep4 via CIDE-CIDE interaction. Predicted to be involved in regulation of apoptotic process.	negative	all	1.22925	0.114976
FBgn0028407	Drep3	GAGA type 2	indirect	GGCAAAGAGAGAGAGAGAGAGAGAGAGC	DNA fragmentation factor-related protein 3 (Drep3) encodes a CIDE domain containing protein that can interact with the proteins encoded by Drep2 and Drep4 via CIDE-CIDE interaction. Predicted to be involved in regulation of apoptotic process.	negative	all	1.22925	0.114976
FBgn0028407	Drep3	GAGA type 2	indirect	CAAAGAGAGAGAGAGAGAGAGAGAGCGA	DNA fragmentation factor-related protein 3 (Drep3) encodes a CIDE domain containing protein that can interact with the proteins encoded by Drep2 and Drep4 via CIDE-CIDE interaction. Predicted to be involved in regulation of apoptotic process.	negative	all	1.22925	0.114976
FBgn0028407	Drep3	GAGA type 2	indirect	AAGAGAGAGAGAGAGAGAGAGAGCGAGC	DNA fragmentation factor-related protein 3 (Drep3) encodes a CIDE domain containing protein that can interact with the proteins encoded by Drep2 and Drep4 via CIDE-CIDE interaction. Predicted to be involved in regulation of apoptotic process.	negative	all	1.22925	0.114976
FBgn0028407	Drep3	GAGA type 2	indirect	GAGAGAGAGAGAGAGAGAGAGCGAGCGC	DNA fragmentation factor-related protein 3 (Drep3) encodes a CIDE domain containing protein that can interact with the proteins encoded by Drep2 and Drep4 via CIDE-CIDE interaction. Predicted to be involved in regulation of apoptotic process.	negative	all	1.22925	0.114976
FBgn0028407	Drep3	GAGA type 2	indirect	GAGAGAGAGAGAGAGAGAGCGAGCGCTC	DNA fragmentation factor-related protein 3 (Drep3) encodes a CIDE domain containing protein that can interact with the proteins encoded by Drep2 and Drep4 via CIDE-CIDE interaction. Predicted to be involved in regulation of apoptotic process.	negative	all	1.22925	0.114976
FBgn0028407	Drep3	GAGA type 2	indirect	GAGAGAGAGAGAGAGCGAGCGCTCTGTT	DNA fragmentation factor-related protein 3 (Drep3) encodes a CIDE domain containing protein that can interact with the proteins encoded by Drep2 and Drep4 via CIDE-CIDE interaction. Predicted to be involved in regulation of apoptotic process.	negative	all	1.22925	0.114976
FBgn0283531	Duox	GAGA type 1	indirect	TCCGTGTTGGAGCTCGAATCGGTCC	Plays a role in innate immunity limiting microbial proliferation in the gut (PubMed:16272120, PubMed:25639794). Acts downstream of a hh-signaling pathway to induce the production of reactive oxygen species (ROS) in response to intestinal bacterial infection (PubMed:25639794). May generate antimicrobial oxidative burst through its peroxidase-like domain	negative	all	0.618829	0.0171167
FBgn0283531	Duox	GAGA type 1	direct	GACCGATTCGAGCTCCAACACGGAT	Plays a role in innate immunity limiting microbial proliferation in the gut (PubMed:16272120, PubMed:25639794). Acts downstream of a hh-signaling pathway to induce the production of reactive oxygen species (ROS) in response to intestinal bacterial infection (PubMed:25639794). May generate antimicrobial oxidative burst through its peroxidase-like domain	negative	all	0.618829	0.0171167
FBgn0283531	Duox	GAGA type 2	direct	GAGCCCCAAAGAGCGGGAGCGAGGCCAC	Plays a role in innate immunity limiting microbial proliferation in the gut (PubMed:16272120, PubMed:25639794). Acts downstream of a hh-signaling pathway to induce the production of reactive oxygen species (ROS) in response to intestinal bacterial infection (PubMed:25639794). May generate antimicrobial oxidative burst through its peroxidase-like domain	negative	all	0.618829	0.0171167
FBgn0263933	ebi	GAGA type 1	direct	ATGGACGAAGAGAGACGACAATTCG	ebi (ebi) encodes a nuclear-localized protein that regulates Egfr, Notch and Wg signaling pathways. ebi encoded product contributes to multiple processes including wing growth and eye development as well as regulation of transcription and innate immune response.	negative	development	0.820872	0.181483
FBgn0263933	ebi	GAGA type 2	indirect	AAGCTCCAGCGAGTTGGAGTTCCATAAA	ebi (ebi) encodes a nuclear-localized protein that regulates Egfr, Notch and Wg signaling pathways. ebi encoded product contributes to multiple processes including wing growth and eye development as well as regulation of transcription and innate immune response.	negative	development	0.820872	0.181483
FBgn0000542	ec	GAGA type 1	indirect	GCGATGGTGGAGAGACGAGATGGTG	echinus (ec) encodes a protein phosphatase 1 (PP1) binding protein involved in interommatidial cell sorting and cell death.	positive	development	0.8701	0.537762
FBgn0000542	ec	GAGA type 1	indirect	GAGATGGTGGAGAGACGAAATGGTG	echinus (ec) encodes a protein phosphatase 1 (PP1) binding protein involved in interommatidial cell sorting and cell death.	positive	development	0.8701	0.537762
FBgn0000546	Ecdysone receptor	GAGA type 2	direct	AAACTGCGTTGAGAGCGAGCCAAAGCGT	Ecdysone receptor (EcR) encodes a protein that interacts with the product of usp to form the nuclear ecdysone receptor heterodimer, which modulates, in conjunction with co-activators and co-repressors, the activities of hundreds of genes in a tissue- and stage-specific way. EcR is widely expressed in embryonic and larval tissues and in some adult tissues where its activities (modulated by the hor…	positive	all, development	0.962577	0.922007
FBgn0003731	Egfr	GAGA type 1	direct	TGCGAGCGAGAGAGAGAGAGCGAAG	Epidermal growth factor receptor (Egfr) encodes the transmembrane tyrosine kinase receptor for signaling ligands (encoded by grk, spi, vn, and Krn) in the TGFα family, which utilises the intracellular MAP kinase pathway. The product of Egfr contributes to growth regulation, cell survival and developmental patterning.	negative	all	0.698199	0.0636001
FBgn0003731	Egfr	GAGA type 1	direct	CGAGCGAGAGAGAGAGAGCGAAGTT	Epidermal growth factor receptor (Egfr) encodes the transmembrane tyrosine kinase receptor for signaling ligands (encoded by grk, spi, vn, and Krn) in the TGFα family, which utilises the intracellular MAP kinase pathway. The product of Egfr contributes to growth regulation, cell survival and developmental patterning.	negative	all	0.698199	0.0636001
FBgn0003731	Egfr	GAGA type 1	direct	AGCGAGAGAGAGAGAGCGAAGTTCG	Epidermal growth factor receptor (Egfr) encodes the transmembrane tyrosine kinase receptor for signaling ligands (encoded by grk, spi, vn, and Krn) in the TGFα family, which utilises the intracellular MAP kinase pathway. The product of Egfr contributes to growth regulation, cell survival and developmental patterning.	negative	all	0.698199	0.0636001
FBgn0003731	Egfr	GAGA type 1	direct	TCGAACATCGAGCGAAACGGGCAAA	Epidermal growth factor receptor (Egfr) encodes the transmembrane tyrosine kinase receptor for signaling ligands (encoded by grk, spi, vn, and Krn) in the TGFα family, which utilises the intracellular MAP kinase pathway. The product of Egfr contributes to growth regulation, cell survival and developmental patterning.	negative	all	0.698199	0.0636001
FBgn0003731	Egfr	GAGA type 2	direct	AACTTGTTGCGAGCGAGAGAGAGAGAGC	Epidermal growth factor receptor (Egfr) encodes the transmembrane tyrosine kinase receptor for signaling ligands (encoded by grk, spi, vn, and Krn) in the TGFα family, which utilises the intracellular MAP kinase pathway. The product of Egfr contributes to growth regulation, cell survival and developmental patterning.	negative	all	0.698199	0.0636001
FBgn0003731	Egfr	GAGA type 2	direct	TGTTGCGAGCGAGAGAGAGAGAGCGAAG	Epidermal growth factor receptor (Egfr) encodes the transmembrane tyrosine kinase receptor for signaling ligands (encoded by grk, spi, vn, and Krn) in the TGFα family, which utilises the intracellular MAP kinase pathway. The product of Egfr contributes to growth regulation, cell survival and developmental patterning.	negative	all	0.698199	0.0636001
FBgn0003731	Egfr	GAGA type 2	direct	TTGCGAGCGAGAGAGAGAGAGCGAAGTT	Epidermal growth factor receptor (Egfr) encodes the transmembrane tyrosine kinase receptor for signaling ligands (encoded by grk, spi, vn, and Krn) in the TGFα family, which utilises the intracellular MAP kinase pathway. The product of Egfr contributes to growth regulation, cell survival and developmental patterning.	negative	all	0.698199	0.0636001
FBgn0003731	Egfr	GAGA type 2	direct	GCGAGCGAGAGAGAGAGAGCGAAGTTCG	Epidermal growth factor receptor (Egfr) encodes the transmembrane tyrosine kinase receptor for signaling ligands (encoded by grk, spi, vn, and Krn) in the TGFα family, which utilises the intracellular MAP kinase pathway. The product of Egfr contributes to growth regulation, cell survival and developmental patterning.	negative	all	0.698199	0.0636001
FBgn0033483	eiger	GAGA type 2	indirect	GCAGGCAGGCGAGCAAGAGGGACAACGG	eiger (egr) encodes the TNF superfamily ligand that activates the intracellular JNK pathway through its receptor encoded by grnd or wgn. Its roles include cell death, tumor suppression, tumor promotion, growth regulation, host defense, pain sensitization, and nutrient response. cts upstream of with a positive effect on apoptotic process.	positive	all	1.91364	0.00456738
FBgn0033690	EndoG	GAGA type 1	indirect	AAGATATCCGAGCTCGAATAACTCG	Endonuclease G (EndoG) encodes an enzyme with endodeoxyribonuclease and endoribonuclease activity. It is involved in germ cell programmed cell death, mitochondrion inheritance and spermatid development.	positive	all (execution)	0.973272	0.912393
FBgn0033690	EndoG	GAGA type 1	direct	GAGTTATTCGAGCTCGGATATCTTG	Endonuclease G (EndoG) encodes an enzyme with endodeoxyribonuclease and endoribonuclease activity. It is involved in germ cell programmed cell death, mitochondrion inheritance and spermatid development.	positive	all (execution)	0.973272	0.912393
FBgn0000577	engrailed	GAGA type 2	direct	CGCCCCGTGAGAGAGGGAGAGCTTGCGC	engrailed (en) encodes a homeodomain-containing transcription factor that is essential for posterior compartment identity and for compartment boundary formation and maintenance. It positively regulates the hh gene and negatively regulates the Hedgehog targets encoded by ci, ptc and dpp	negative	development	2.59335	1.80287e-08
FBgn0000577	engrailed	GAGA type 2	direct	CCCCGTGAGAGAGGGAGAGCTTGCGCCT	engrailed (en) encodes a homeodomain-containing transcription factor that is essential for posterior compartment identity and for compartment boundary formation and maintenance. It positively regulates the hh gene and negatively regulates the Hedgehog targets encoded by ci, ptc and dpp	negative	development	2.59335	1.80287e-08
FBgn0000320	eya	GAGA type 1	indirect	GCGAGTTTTGAGTGAGTTTCCTCTG	eyes absent (eya) encodes a transcriptional cofactor that physically interacts with several other retinal determination proteins, including those encoded by ey, dac, and so. The product of eya regulates eye, gonad, and brain development as well as axon pathfinding.	negative	development	0.892344	0.44382
FBgn0000320	eya	GAGA type 1	indirect	GCCGCTTTTGAGTGAGTTTTCTCAG	eyes absent (eya) encodes a transcriptional cofactor that physically interacts with several other retinal determination proteins, including those encoded by ey, dac, and so. The product of eya regulates eye, gonad, and brain development as well as axon pathfinding.	negative	development	0.892344	0.44382
FBgn0000320	eya	GAGA type 2	direct	CCAAGCGTGCGAGCGAGAGCGCAGCGCT	eyes absent (eya) encodes a transcriptional cofactor that physically interacts with several other retinal determination proteins, including those encoded by ey, dac, and so. The product of eya regulates eye, gonad, and brain development as well as axon pathfinding.	negative	development	0.892344	0.44382
FBgn0001075	fat	GAGA type 1	indirect	GACTCTCCGGAGAGAGATACCTGTT	fat (ft) is a tumor suppressor gene that encodes a large cadherin family transmembrane protein. It functions in the Hippo signaling pathway (as a receptor) and the Dachsous-Fat planar cell polarity pathway (as a transmembrane component).	positive	all	3.69092	2.63927e-11
FBgn0001075	fat	GAGA type 2	indirect	GCTACGCAGAGAGATAGAGTTGGACTCT	fat (ft) is a tumor suppressor gene that encodes a large cadherin family transmembrane protein. It functions in the Hippo signaling pathway (as a receptor) and the Dachsous-Fat planar cell polarity pathway (as a transmembrane component).	positive	all	3.69092	2.63927e-11
FBgn0266084	Fhos	GAGA type 1	indirect	TCGGCAAGCGAGAGATTCGATCGGA	Formin homology 2 domain containing (Fhos) encodes a protein that regulates actin-dependent remodeling of muscle cytoskeleton via induction of actin stress fibers, directs macrophage migration during cellular immune response, and is involved in autophagic programmed cell death.	positive	all, development	2.09306	0.000134098
FBgn0266084	Fhos	GAGA type 1	direct	TCCGTTCAAGAGAGAATCGGAATGA	Formin homology 2 domain containing (Fhos) encodes a protein that regulates actin-dependent remodeling of muscle cytoskeleton via induction of actin stress fibers, directs macrophage migration during cellular immune response, and is involved in autophagic programmed cell death.	positive	all, development	2.09306	0.000134098
FBgn0028734	Fmr1	GAGA type 1	indirect	GCCTTGCCAGAGTGACTATAAGTTG	Fmr1 (Fmr1) encodes an RNA and channel binding protein. It acts as a neural growth brake regulating RNA trafficking, RNA translation and neuronal excitability. Fmr1 loss causes Fragile X syndrome	positive	development	0.852326	0.343781
FBgn0000659	fork head	GAGA type 2	direct	GGCCATTGGCGAGAACGAGTCGGAGCTG	fork head (fkh) encodes a winged-helix nuclear transcription factor most studied for its role in salivary gland formation, where it is required for salivary gland viability, invagination, and maintaining expression of other early-expressed salivary gland transcription factors. It works with the product of sage to activate expression of salivary gland specific gene products, such as secreted prote…	negative	development	2.81482	0.431859
FBgn0000659	fork head	GAGA type 2	direct	TGGCGAGAACGAGTCGGAGCTGGTGCTG	fork head (fkh) encodes a winged-helix nuclear transcription factor most studied for its role in salivary gland formation, where it is required for salivary gland viability, invagination, and maintaining expression of other early-expressed salivary gland transcription factors. It works with the product of sage to activate expression of salivary gland specific gene products, such as secreted prote…	negative	development	2.81482	0.431859
FBgn0259108	futsch	GAGA type 1	indirect	CGCCAGCCAGAGTGACGACATCGAA	futsch (futsch) encodes a microtubule binding protein involved in the formation of synaptic buttons at the neuromuscular junctions. Its expression levels are regulated by the product of TBPH to prevent synaptic defects	negative	development	0.581373	0.0179473
FBgn0261703	gce	GAGA type 2	direct	CAAGTTGCGTGAGCGCGAGCGAGACGGC	germ cell-expressed bHLH-PAS (gce) encodes a bHLH-PAS domain transcription factor paralogous to the product of Met. It is a receptor for the sesquiterpenoid juvenile hormone.	negative	development	1.73054	0.0168063
FBgn0261703	gce	GAGA type 2	direct	AAAGCTGTCTGAGCGCGAGAGTCCTGGC	germ cell-expressed bHLH-PAS (gce) encodes a bHLH-PAS domain transcription factor paralogous to the product of Met. It is a receptor for the sesquiterpenoid juvenile hormone.	negative	development	1.73054	0.0168063
FBgn0261703	gce	GAGA type 1	direct	CGTGAGCGCGAGCGAGACGGCTGTG	germ cell-expressed bHLH-PAS (gce) encodes a bHLH-PAS domain transcription factor paralogous to the product of Met. It is a receptor for the sesquiterpenoid juvenile hormone.	negative	development	1.73054	0.0168063
FBgn0015946	grim	GAGA type 1	indirect	AGAAGCGGTGAGAGACTCGGGAAAT	grim (grim) encodes a member of the inhibitor of apoptotic protein antagonists. In response to death signals, it induces apoptosis of cells in the central nervous system. It is important particularly for the apoptosis of specific juvenile neurons during metamorphosis	positive	all, development	#N/A	#N/A
FBgn0015946	grim	GAGA type 1	direct	ATTCACTGCGAGAGAGGAACTCGCT	grim (grim) encodes a member of the inhibitor of apoptotic protein antagonists. In response to death signals, it induces apoptosis of cells in the central nervous system. It is important particularly for the apoptosis of specific juvenile neurons during metamorphosis	positive	all, development	#N/A	#N/A
FBgn0032682	grnd	GAGA type 1	indirect	TTGCGCTATGAGTGAAATACTCCCG	grindelwald (grnd) encodes a receptor of the TNF superfamily ligand encoded by egr, which activates the intracellular JNK pathway. It is involved in apoptosis and neoplastic growth.	positive	all	1.36844	0.0627924
FBgn0025825	HDAC3	GAGA type 1	direct	ACATGCACAGAGAGACTTGTGAATT	Histone deacetylase 3 (HDAC3) encodes a histone deacetylase involved in chromatin silencing. It controls cell growth through apoptosis suppression by regulating transcription of hid.	negative	all	#N/A	#N/A
FBgn0025825	HDAC3	GAGA type 1	direct	ACATGCACAGAGAGACTTGTGAATT	Histone deacetylase 3 (HDAC3) encodes a histone deacetylase involved in chromatin silencing. It controls cell growth through apoptosis suppression by regulating transcription of hid.	negative	all	#N/A	#N/A
FBgn0010303	hep	GAGA type 1	indirect	GGTCGATTCGAGAGACTTCGTTGTT	hemipterous (hep) encodes a serine/threonine protein kinase involved in the Jun-N-terminal kinase pathway by phosphorylating the product of bsk.	positive	all	0.964282	0.888978
FBgn0003997	hid	GAGA type 1	direct	CATGTGCAGGAGAGGGAGCGAGAGA	Activator of apoptosis, with grim and rpr, that acts on the effector Dredd	positive	all	0.941146	0.784755
FBgn0003997	hid	GAGA type 1	direct	AGAGGGAGCGAGAGAGATTGCGATT	Activator of apoptosis, with grim and rpr, that acts on the effector Dredd	positive	all	0.941146	0.784755
FBgn0003997	hid	GAGA type 1	direct	AGGGAGCGAGAGAGATTGCGATTGC	Activator of apoptosis, with grim and rpr, that acts on the effector Dredd	positive	all	0.941146	0.784755
FBgn0003997	hid	GAGA type 2	indirect	ATAGCTGAGTGAGGAAGAGTATACTCGG	Activator of apoptosis, with grim and rpr, that acts on the effector Dredd	positive	all	0.941146	0.784755
FBgn0003997	hid	GAGA type 2	direct	GCATGTGCAGGAGAGGGAGCGAGAGAGA	Activator of apoptosis, with grim and rpr, that acts on the effector Dredd	positive	all	0.941146	0.784755
FBgn0003997	hid	GAGA type 2	direct	GCAGGAGAGGGAGCGAGAGAGATTGCGA	Activator of apoptosis, with grim and rpr, that acts on the effector Dredd	positive	all	0.941146	0.784755
FBgn0035142	Hipk	GAGA type 2	direct	AAAACCGGCAGAGTCAGAGTGACCAGCT	Homeodomain interacting protein kinase (Hipk) encodes a protein that belongs to the DYRK family kinases. It can modulate signaling pathways including Wingless, Notch, Hippo, Hedgehog, JNK, and cell death. It plays roles in development, proliferation and patterning of many tissues, including the eye, wing, and the embryo	positive	all	0.648219	0.0201069
FBgn0035142	Hipk	GAGA type 1	indirect	GTGAGTCCGGAGCTTGAATGCTCGA	Homeodomain interacting protein kinase (Hipk) encodes a protein that belongs to the DYRK family kinases. It can modulate signaling pathways including Wingless, Notch, Hippo, Hedgehog, JNK, and cell death. It plays roles in development, proliferation and patterning of many tissues, including the eye, wing, and the embryo	positive	all	0.648219	0.0201069
FBgn0032525	Hsp60D	GAGA type 2	indirect	TAGATCAGCCGAGTTTGAGCTACGTGGA	Heat shock protein 60D (Hsp60D) encodes a protein involved in caspase-mediated apoptosis and polyQ-mediated neurodegeneration.	positive	all	0.847923	0.160799
FBgn0261984	Ire1	GAGA type 2	indirect	TCAAAGGACGGAGCAAGAGCTCCCAGGA	Inositol-requiring enzyme-1 (Ire1) encodes a transmembrane protein that mediates the unfolded protein response. Misfolded peptides in the endoplasmic reticulum activate the RNase activity of the product of Ire1, thereby promoting the cleavage of its downstream substrates, such as Xbp1 mRNA. The product of Ire1 is also required for photoreceptor differentiation	negative	all	0.917304	0.6926
FBgn0010051	Itpr	GAGA type 1	direct	AGATCGTTAGAGTGACCATTTCATT	Inositol 1,4,5,-trisphosphate receptor (Itpr) encodes an intracellular ligand gated calcium channel. It functions downstream of G-protein coupled receptors that activate Gq/PLCbeta signaling and generate inositol tris-phosphate. Itpr depletion affects ecdysone release, response to nutritional stress, lipid metabolism and flight.	positive	all, development	1.17937	0.527144
FBgn0013469	klu	GAGA type 2	indirect	AAAGTCGCGAGAGAGCGAGAAAGAGCAG	transcription factor - zinc finger - early growth response family - involved in determination of the identities of secondary precursor cells within neuroblast lineages in the central nervous system - a genetic cascade involving and specifies the abdominal leucokinergic neurons in the Drosophila CNS	positive	development	0.601032	0.0322315
FBgn0013469	klu	GAGA type 2	indirect	GCGAGAGAGCGAGAAAGAGCAGCACGTG	transcription factor - zinc finger - early growth response family - involved in determination of the identities of secondary precursor cells within neuroblast lineages in the central nervous system - a genetic cascade involving and specifies the abdominal leucokinergic neurons in the Drosophila CNS	positive	development	0.601032	0.0322315
FBgn0029800	lin-52	GAGA type 1	direct	GAGGTCGCGGAGAGGTTCGCGTTTC	lin-52 (lin-52) encodes a subunit of the MuvB core complex. The MuvB core binds to the oncoprotein encoded by Myb and the Rbf-E2f2-Dp tumor suppressor complex, thereby controlling the expression of many genes, including critical regulators of the cell cycle. Involved in compound eye development; negative regulation of execution phase of apoptosis;	negative	all (execution)	1.43486	0.0160972
FBgn0001234	lncRNA:Hsrω	GAGA type 1	indirect	TAAAAACAAGAGAGAGTTCTATAAT	Heat shock RNA ω (lncRNA:Hsrω) is a developmentally expressed and stress-inducible long non-coding RNA gene, producing multiple nuclear and cytoplasmic transcripts. The long nuclear transcripts, in association with various heterogeneous nuclear ribonucleoproteins (hnRNPs), organize nucleoplasmic omega speckles to regulate multiple cellular processes. It is involved in the biological process descr…	positive	all	3.3567	1.58172e-13
FBgn0283521	lola	GAGA type 2	indirect	TAGAACAAGTGAGTGCGAGCGAGATGGG	longitudinals lacking (lola) encodes a protein involved in Notch signaling, cell death, regulation of retrotransposons and expression of axon and dendrite patterning genes. It contributes to oogenesis, spermatogenesis, neural wiring, eye development and a variety of behaviors.	positive	development	1.09106	0.584294
FBgn0002719	Men	GAGA type 2	indirect	CGGCCCAAAGGAGAAGGAGAAGGAGAGT	Malic enzyme (Men) encodes a dehydrogenase that catalyzes the oxidation of malate to pyruvate, with the concomitant reduction of NADP[+] to NADPH. It functions, along with the products of Idh, Zw, and Pgd, in a small network of NADP reducing enzymes	negative	all	0.752128	0.0103485
FBgn0002719	Men	GAGA type 2	indirect	AAAGGAGAAGGAGAAGGAGAGTGTCCGG	Malic enzyme (Men) encodes a dehydrogenase that catalyzes the oxidation of malate to pyruvate, with the concomitant reduction of NADP[+] to NADPH. It functions, along with the products of Idh, Zw, and Pgd, in a small network of NADP reducing enzymes	negative	all	0.752128	0.0103485
FBgn0002723	Met	GAGA type 2	direct	TGCCGTAAACAAGAAAGAGCGCCAATAG	Methoprene-tolerant (Met) encodes bHLH-PAS domain transcription factor paralogous to gce. It is a receptor for the sesquiterpenoid juvenile hormone.	negative	development	0.924216	0.8039
FBgn0262429	mir-13a	GAGA type 2	indirect	GTGAGTGCACGAGTGAGAGAATCTGTGT	Enables mRNA 3'-UTR binding activity and mRNA binding activity involved in posttranscriptional gene silencing. Involved in gene silencing by miRNA and negative regulation of apoptotic process.	negative	all	#N/A	#N/A
FBgn0262447	mir-14	GAGA type 1	direct	AAAGAGAATGAGAGAGCGAAAAAGC	a cell death suppressor - regulates fat metabolism - regulates insulin production and metabolism through its target,	negative	all	#N/A	#N/A
FBgn0262447	mir-14	GAGA type 2	direct	CAAATCCAAAGAGAATGAGAGAGCGAAA	a cell death suppressor - regulates fat metabolism - regulates insulin production and metabolism through its target,	negative	all	#N/A	#N/A
FBgn0262371	mir-263b	GAGA type 2	direct	GGCTCGAATCGAGTGCTAGCGACAGGGA	Enables mRNA 3'-UTR binding activity and mRNA binding activity involved in posttranscriptional gene silencing. Involved in several processes, including positive regulation of locomotor rhythm; regulation of branching morphogenesis of a nerve; and sensory organ development. Is expressed in adult central nervous system; external sensory organ precursor cell; haltere; interommatidial bristle; and se…	negative	all	#N/A	#N/A
FBgn0262419	mir-277	GAGA type 2	direct	TGTTCTGCATGAGCCCTCTTTTGTTTCT	microRNA that carries out post-transcriptional gene regulation, modulates rCGG repeat-mediated neurodegeneration and the pathogenesis of FXTAS neurodegenerative disorder by post-transcriptionally regulating the expression of specific mRNAs involved in the disease	positive	all	#N/A	#N/A
FBgn0262403	mir-278	GAGA type 1	indirect	CTGCGAAGTGAGAGAAGTAAATGAA	Involved in female germ-line stem cell asymmetric division and negative regulation of apoptotic process.	negative	all	#N/A	#N/A
FBgn0262377	mir-2a-1	GAGA type 1	indirect	TGACTGCGGGAGTTCAGAATTTTCA	Enables mRNA 3'-UTR binding activity and mRNA binding activity involved in posttranscriptional gene silencing. Involved in gene silencing by miRNA; negative regulation of apoptotic process; and negative regulation of translational initiation. Is expressed in embryonic epidermis; embryonic hindgut; and organism	negative	all	#N/A	#N/A
FBgn0262460	mir-2a-2	GAGA type 1	indirect	TGACTGCGGGAGTTCAGAA	Enables mRNA 3'-UTR binding activity and mRNA binding activity involved in posttranscriptional gene silencing. Involved in gene silencing by miRNA; negative regulation of apoptotic process; and negative regulation of translational initiation.	negative	all	#N/A	#N/A
FBgn0262397	mir-2c	GAGA type 2	indirect	GTGAGTGCACGAGTGAGAGAATCTGTGT	Enables mRNA 3'-UTR binding activity and mRNA binding activity involved in posttranscriptional gene silencing. Involved in gene silencing by miRNA; negative regulation of apoptotic process; and negative regulation of translational initiation. Is expressed in embryonic/larval brain and larval ventral nerve cord.	negative	all	#N/A	#N/A
FBgn0262464	mir-6-1	GAGA type 1	direct	TAAAGTTGCGAGTGAAAATTAAAAT	Enables mRNA 3'-UTR binding activity and mRNA binding activity involved in posttranscriptional gene silencing. Involved in gene silencing by miRNA and negative regulation of apoptotic process. Is expressed in dorsal ectoderm and organism.	negative	all	#N/A	#N/A
FBgn0262464	mir-6-1	GAGA type 2	indirect	ACCTTTCTTTGAAAAAGAGACCATACCG	Enables mRNA 3'-UTR binding activity and mRNA binding activity involved in posttranscriptional gene silencing. Involved in gene silencing by miRNA and negative regulation of apoptotic process. Is expressed in dorsal ectoderm and organism.	negative	all	#N/A	#N/A
FBgn0262410	mir-6-2	GAGA type 1	direct	TAAAGTTGCGAGTGAAAATTAAAAT	Enables mRNA 3'-UTR binding activity and mRNA binding activity involved in posttranscriptional gene silencing. Involved in gene silencing by miRNA and negative regulation of apoptotic process	negative	all	#N/A	#N/A
FBgn0039140	Mitochondrial Rho	GAGA type 2	direct	TTGAGCATTCGAGCACTCGAACTCGAAC	Mitochondrial Rho (Miro) encodes an atypical GTPase and Ca[2+] sensor on the outer mitochondrial membrane that is vital for mitochondrial homeostasis and microtubule-based mitochondrial transport. It mediates linkage to kinesin and dynein motors through interactions with Milton/TRAK adaptor proteins	positive	all	0.767658	0.0120951
FBgn0039140	Mitochondrial Rho	GAGA type 2	indirect	GCTCCAGTTCGAGTTCGAGTGCTCGAAT	Mitochondrial Rho (Miro) encodes an atypical GTPase and Ca[2+] sensor on the outer mitochondrial membrane that is vital for mitochondrial homeostasis and microtubule-based mitochondrial transport. It mediates linkage to kinesin and dynein motors through interactions with Milton/TRAK adaptor proteins	positive	all	0.767658	0.0120951
FBgn0039140	Mitochondrial Rho	GAGA type 2	indirect	GTTCGAGTTCGAGTGCTCGAATGCTC	Mitochondrial Rho (Miro) encodes an atypical GTPase and Ca[2+] sensor on the outer mitochondrial membrane that is vital for mitochondrial homeostasis and microtubule-based mitochondrial transport. It mediates linkage to kinesin and dynein motors through interactions with Milton/TRAK adaptor proteins	positive	all	0.767658	0.0120951
FBgn0026252	moleskin	GAGA type 1	indirect	GTTAAAGGCGAGCGAAGATCGCAAC	moleskin (msk) encodes an importin that contributes to protein import into the nucleus. It is involved in eye development, muscle attachment and wing cell fate specification. involved_in negative regulation of neuron apoptotic process	negative	development	0.775072	0.0395707
FBgn0036486	Msh6	GAGA type 1	direct	AACGGGCACGAGTTCCCTAAATATA	Msh6 (Msh6) encodes a heterodimer with the product of spel1 to detect base-base mismatches and small insertion/deletion loops. It then recruits the rest of the mismatch repair machinery.	positive	all	0.643198	0.00507397
FBgn0262656	myc	GAGA type 1	indirect	AGTGAAAGAGAGTGAGATTTTTGAG	Myc (Myc) encodes a transcription factor that is homologous to vertebrate Myc proto-oncogenes. It contributes to cell growth, cell competition and regenerative proliferation.	positive	all	0.635584	0.133503
FBgn0262656	myc	GAGA type 2	indirect	TTTTTTGAGTGAAAGAGAGTGAGATTTT	Myc (Myc) encodes a transcription factor that is homologous to vertebrate Myc proto-oncogenes. It contributes to cell growth, cell competition and regenerative proliferation.	activator	all	0.635584	0.133503
FBgn0262656	myc	GAGA type 2	indirect	TTGAGTGAAAGAGAGTGAGATTTTTGAG	Myc (Myc) encodes a transcription factor that is homologous to vertebrate Myc proto-oncogenes. It contributes to cell growth, cell competition and regenerative proliferation.	activator	all	0.635584	0.133503
FBgn0031043	Naa20A	GAGA type 1	direct	GAAGAAGAAGAGCGAGGACAGGACC	N(alpha)-acetyltransferase 20 A Predicted to enable peptide alpha-N-acetyltransferase activity. Involved in histone acetylation and negative regulation of neuron apoptotic process. Part of NatB complex.	negative	development	1.40635	0.0275725
FBgn0031043	Naa20A	GAGA type 2	direct	GCCTGCCGTTGAGACTGAGACTGTTCCA	N(alpha)-acetyltransferase 20 A Predicted to enable peptide alpha-N-acetyltransferase activity. Involved in histone acetylation and negative regulation of neuron apoptotic process. Part of NatB complex.	negative	development	1.40635	0.0275725
FBgn0002962	nanos	GAGA type 2	direct	GTTGCAAAACGAGCGCTCTTCGCCGGCG	nanos (nos) encodes an RNA-binding protein that forms part of a translational repressor complex. It functions as the localized determinant of abdominal segmentation. It contributes to germline development, germline stem cell renewal, and neuronal morphogenesis and function	negative	development	1.09746	0.70352
FBgn0261530	nbs	GAGA type 1	indirect	ACAAAGAAGGAGTGAGAATAATAGG	nbs (nbs) encodes a component of the conserved MRN complex, which plays an important role in the repair of DNA double strand breaks. The product of nbs is required to prevent chromosome breakage, interacts with the telomere capping complex and prevents telomeric fusions	negative	all	1.03336	0.8039
FBgn0262738	norpA	GAGA type 1	indirect	TTTAAAACAGAGAGACATAAATGCA	The production of the second messenger molecules diacylglycerol (DAG) and inositol 1,4,5-trisphosphate (IP3) is mediated by activated phosphatidylinositol-specific phospholipase C enzymes (By similarity). Essential component of the phototransduction pathway . Essential downstream component of a hh-signaling pathway which regulates the Duox-dependent gut immune response to bacterial uracil; requir…	negative	development	1.09078	0.691528
FBgn0035461	ntc	GAGA type 2	direct	ATCTAGAAACTAGCTAGAGATTTCAATT	nutcracker Functions together with PI31 to control non-apoptotic caspase activation during sperm individualization. Positively regulates PI31 stability.	negative	development	0.926506	0.620241
FBgn0035461	ntc	GAGA type 1	indirect	GCAGATGAGGAGAGAGTCGCTTGTT	nutcracker Functions together with PI31 to control non-apoptotic caspase activation during sperm individualization. Positively regulates PI31 stability.	negative	development	0.926506	0.620241
FBgn0261276	Optic atrophy 1	GAGA type 2	indirect	CTTAACTACATCTTAAGAGCTTTAAGTA	Optic atrophy 1 (Opa1) encodes a dynamin-related GTPase that mediates fusion of the inner membrane of mitochondria. It usually works with the product of Marf to coordinately fuse both mitochondrial membranes. The product of Opa1 activity is regulated by proteolytic processing. involved_in negative regulation of endoplasmic reticulum stress-induced intrinsic apoptotic signaling pathway	negative	all	0.981383	0.919174
FBgn0019952	Orct	GAGA type 1	direct	ATATATGGGGAGCTCATATATAATA	Organic cation transporter, Probably transports organic cations. Predicted to enable transmembrane transporter activity. Predicted to be involved in apoptotic process.	?	?	6.59368	2.19192e-27
FBgn0259834	out	GAGA type 2	direct	GAGACAGGTGGAGAGAGAGGGAAGGCTA	outsiders (out) encodes a monocarboxylate transporter involved in programmed cell death of primordial germ cell/pole cells.	negative	development	1.07619	0.630301
FBgn0259834	out	GAGA type 2	indirect	ACGGCGGAACGAGAGCGAGATGGTCGGA	outsiders (out) encodes a monocarboxylate transporter involved in programmed cell death of primordial germ cell/pole cells.	negative	development	1.07619	0.630301
FBgn0259834	out	GAGA type 1	indirect	CCGTACACTGAGAGAAATTTGCATT	outsiders (out) encodes a monocarboxylate transporter involved in programmed cell death of primordial germ cell/pole cells.	negative	development	1.07619	0.630301
FBgn0003892	patched	GAGA type 2	direct	CACGAAACAAGAGAGCGAGTGAGAGTAG	patched (ptc) is a segment polarity gene that encodes a 12-pass transmembrane protein involved in Hh signalling regulation. ptc product contributes to the binding, internalization and degradation of the ligand encoded by hh, limiting its activity spatial range. ptc product also represses the constitutive signaling activity of the transmembrane protein encoded by smo.	negative	development	1.35678	0.155524
FBgn0003892	patched	GAGA type 2	direct	ACAAGAGAGCGAGTGAGAGTAGGGAGAG	patched (ptc) is a segment polarity gene that encodes a 12-pass transmembrane protein involved in Hh signalling regulation. ptc product contributes to the binding, internalization and degradation of the ligand encoded by hh, limiting its activity spatial range. ptc product also represses the constitutive signaling activity of the transmembrane protein encoded by smo.	negative	development	1.35678	0.155524
FBgn0003892	patched	GAGA type 2	direct	CCCGCTGGGCAAGAGAGAGTGAGAGAGA	patched (ptc) is a segment polarity gene that encodes a 12-pass transmembrane protein involved in Hh signalling regulation. ptc product contributes to the binding, internalization and degradation of the ligand encoded by hh, limiting its activity spatial range. ptc product also represses the constitutive signaling activity of the transmembrane protein encoded by smo.	negative	development	1.35678	0.155524
FBgn0003892	patched	GAGA type 2	direct	CTGGGCAAGAGAGAGTGAGAGAGAGAAA	patched (ptc) is a segment polarity gene that encodes a 12-pass transmembrane protein involved in Hh signalling regulation. ptc product contributes to the binding, internalization and degradation of the ligand encoded by hh, limiting its activity spatial range. ptc product also represses the constitutive signaling activity of the transmembrane protein encoded by smo.	negative	development	1.35678	0.155524
FBgn0003892	patched	GAGA type 2	direct	GGGCAAGAGAGAGTGAGAGAGAGAAACA	patched (ptc) is a segment polarity gene that encodes a 12-pass transmembrane protein involved in Hh signalling regulation. ptc product contributes to the binding, internalization and degradation of the ligand encoded by hh, limiting its activity spatial range. ptc product also represses the constitutive signaling activity of the transmembrane protein encoded by smo.	negative	development	1.35678	0.155524
FBgn0003892	patched	GAGA type 2	direct	AAGAGAGAGTGAGAGAGAGAAACAGCGG	patched (ptc) is a segment polarity gene that encodes a 12-pass transmembrane protein involved in Hh signalling regulation. ptc product contributes to the binding, internalization and degradation of the ligand encoded by hh, limiting its activity spatial range. ptc product also represses the constitutive signaling activity of the transmembrane protein encoded by smo.	negative	development	1.35678	0.155524
FBgn0266377	Pde8	GAGA type 2	indirect	CGGAGCAGCTGAGGCTGAGCAAATATGT	Hydrolyzes the second messenger cAMP, which is a key regulator of many important physiological processes (By similarity). Involved in the positive regulation of MAP kinase signaling and in inhibiting oxidative stress-induced cell death	negative	all	1.4297	0.037396
FBgn0020386	Pdk1	GAGA type 2	indirect	AACTGGAAGAGAGATAGAGAGTTATGGG	Phosphoinositide-dependent kinase 1 Serine/threonine kinase required for embryonic development. Inhibits apoptosis. Acts in the insulin receptor transduction pathway which regulates cell growth and organ size, by phosphorylating and activating Akt1 and S6k. May be involved in axonal pathfinding and synaptogenesis, and in spermatogenesis.	negative	all	0.583926	2.00398e-06
FBgn0020386	Pdk1	GAGA type 2	indirect	AACTGGAAGAGAGATAGAGAGTTATGGG	Serine/threonine kinase required for embryonic development. Inhibits apoptosis. Acts in the insulin receptor transduction pathway which regulates cell growth and organ size, by phosphorylating and activating Akt1 and S6k. May be involved in axonal pathfinding and synaptogenesis, and in spermatogenesis	negative	all	0.583926	2.00398e-06
FBgn0032749	Phlpp	GAGA type 2	indirect	TCATTGAAAAGAGGGTGAGTTTCAGCAA	PH domain leucine-rich repeat protein phosphatase (Phlpp) encodes an enzyme involved in apoptosis regulation and tumor growth suppression via dephosphorylation of the product of Akt.	positive	all	0.704644	0.0335377
FBgn0032749	Phlpp	GAGA type 2	indirect	TCCGATCAAAGAGCACGAGGGGCTCTCT	PH domain leucine-rich repeat protein phosphatase (Phlpp) encodes an enzyme involved in apoptosis regulation and tumor growth suppression via dephosphorylation of the product of Akt.	positive	all	0.704644	0.0335377
FBgn0029891	Pink1	GAGA type 1	direct	GCCAACAAGGAGAGGATCGACAAGA	PTEN-induced putative kinase 1 (Pink1) is the ortholog of human PINK1, a gene mutated in autosomal recessive Parkinson's disease. Pink1 encodes a mitochondrially targeted Ser-Thr kinase. It has been linked to a number of cellular functions including altering mitochondrial dynamics, the autophagic degradation of dysfunctional mitochondria, and the proper function of Complex I of the electron trans…	negative	all	0.753092	0.0220846
FBgn0013726	pnut	GAGA type 1	direct	AGCAAGTGTGAGAGAGAAGCGAAAG	peanut (pnut) encodes a protein that belongs to the septin family of polymerizing GTPases. Together with the products of Septin1 and Septin2, it forms the septin complex. It participates in cytokinesis and other processes that involve organization of the cell cortex.	positive	all	0.915141	0.638036
FBgn0013726	pnut	GAGA type 1	direct	CAAGTGTGAGAGAGAAGCGAAAGTC	peanut (pnut) encodes a protein that belongs to the septin family of polymerizing GTPases. Together with the products of Septin1 and Septin2, it forms the septin complex. It participates in cytokinesis and other processes that involve organization of the cell cortex.	positive	all	0.915141	0.638036
FBgn0013726	pnut	GAGA type 1	direct	GTTCTCAGCGAGAGAGATAAGCTCA	peanut (pnut) encodes a protein that belongs to the septin family of polymerizing GTPases. Together with the products of Septin1 and Septin2, it forms the septin complex. It participates in cytokinesis and other processes that involve organization of the cell cortex.	positive	all	0.915141	0.638036
FBgn0013726	pnut	GAGA type 1	direct	TCTCAGCGAGAGAGATAAGCTCAGC	peanut (pnut) encodes a protein that belongs to the septin family of polymerizing GTPases. Together with the products of Septin1 and Septin2, it forms the septin complex. It participates in cytokinesis and other processes that involve organization of the cell cortex.	positive	all	0.915141	0.638036
FBgn0013726	pnut	GAGA type 2	indirect	TTGTGACGCTGAGAACTCGACTTTCGCT	peanut (pnut) encodes a protein that belongs to the septin family of polymerizing GTPases. Together with the products of Septin1 and Septin2, it forms the septin complex. It participates in cytokinesis and other processes that involve organization of the cell cortex.	positive	all	0.915141	0.638036
FBgn0003118	pointed	GAGA type 1	direct	AGAGAAAGAGAGAGAGAAACGGAGA	pointed (pnt) encodes an ETS family transcriptional activator that functions downstream of Ras signaling. It is necessary and sufficient for triggering cellular senescence upon Ras activation, and by doing so suppresses Ras-driven tumor growth. involved_in negative regulation of apoptotic signaling pathway	negative	all	2.15694	0.000748938
FBgn0003118	pointed	GAGA type 1	direct	AGAAAGAGAGAGAGAAACGGAGAGA	pointed (pnt) encodes an ETS family transcriptional activator that functions downstream of Ras signaling. It is necessary and sufficient for triggering cellular senescence upon Ras activation, and by doing so suppresses Ras-driven tumor growth. involved_in negative regulation of apoptotic signaling pathway	negative	all	2.15694	0.000748938
FBgn0003118	pointed	GAGA type 2	direct	TAGCAGCGGAGAGAAAGAGAGAGAGAAA	pointed (pnt) encodes an ETS family transcriptional activator that functions downstream of Ras signaling. It is necessary and sufficient for triggering cellular senescence upon Ras activation, and by doing so suppresses Ras-driven tumor growth. involved_in negative regulation of apoptotic signaling pathway	negative	all	2.15694	0.000748938
FBgn0003118	pointed	GAGA type 2	direct	CGGAGAGAAAGAGAGAGAGAAACGGAGA	pointed (pnt) encodes an ETS family transcriptional activator that functions downstream of Ras signaling. It is necessary and sufficient for triggering cellular senescence upon Ras activation, and by doing so suppresses Ras-driven tumor growth. involved_in negative regulation of apoptotic signaling pathway	negative	all	2.15694	0.000748938
FBgn0038519	Prx3	GAGA type 1	direct	GGATTAAGAGAGCGATATATAAAAG	Peroxiredoxin 3 (Prx3) encodes an antioxidant protein involved in hydrogen peroxide catabolism and regulation of apoptosis.	negative	all	1.00362	0.986142
FBgn0243512	puckered	GAGA type 2	direct	CAAAAGGTTTGAGCCCGAGATAAAAGAA	puckered (puc) encodes a serine/threonine protein phosphatase that mediates a feedback loop that regulates the Jun-N-terminal kinase pathway	negative	development	1.10417	0.554475
FBgn0032006	Pvr	GAGA type 1	direct	AAACTAAACGAGAGATAAACTCCCT	PDGF- and VEGF-receptor related (Pvr) encodes a receptor tyrosine kinase activated by the binding of PDGF- and VEGF-related factors (encoded by Pvf1, Pvf2 or Pvf3). It is involved in cell migration regulation and it has been shown to activate the canonical Ras/Raf/MAP kinase (ERK) cascade, the PI3K kinase pathway, TORC1, Rho family small GTPases and the JNK cascade, in a context-dependent manner.	negative	all	0.745071	0.0967893			stress
FBgn0030613	Rab3 GDP-GTP exchange factor	GAGA type 1	direct	TTGTTTTTAGAGAGATTTCTCCGAT	Rab3 GDP-GTP exchange factor (Rab3-GEF) encodes a guanine nucleotide exchange factor (GEF) for the small GTPase encoded by Rab3. They control synaptic development and function, including the regulation of active zone protein composition at the neuromuscular junction. cell death; regulation of programmed cell death;	positive	development	1.42461	0.227558			DNA breaks
FBgn0030613	Rab3 GDP-GTP exchange factor	GAGA type 2	indirect	GCCCCTGCTCGAGCGCTAGTGCAATGTG	Rab3 GDP-GTP exchange factor (Rab3-GEF) encodes a guanine nucleotide exchange factor (GEF) for the small GTPase encoded by Rab3. They control synaptic development and function, including the regulation of active zone protein composition at the neuromuscular junction. cell death; regulation of programmed cell death;	positive	development	1.42461	0.227558
FBgn0030613	Rab3 GDP-GTP exchange factor	GAGA type 2	direct	AATATAATCTGAATGAGAGTTCGTGATA	Rab3 GDP-GTP exchange factor (Rab3-GEF) encodes a guanine nucleotide exchange factor (GEF) for the small GTPase encoded by Rab3. They control synaptic development and function, including the regulation of active zone protein composition at the neuromuscular junction. cell death; regulation of programmed cell death;	positive	development	1.42461	0.227558
FBgn0003079	Raf	GAGA type 2	indirect	ATGAACTACTGAGATCGAGATCGAGTTG	Raf oncogene (Raf) encodes a serine-threonine protein kinase that acts downstream of the product of ras. It activates the MEK/ERK pathway to regulate cell proliferation, differentiation and survival downstream of receptor tyrosine kinases such as those encoded by tor, Egfr, and sev	negative	all	0.866366	0.436234			stress
FBgn0003079	Raf	GAGA type 2	indirect	TACTGAGATCGAGATCGAGTTGATGGCA	Raf oncogene (Raf) encodes a serine-threonine protein kinase that acts downstream of the product of ras. It activates the MEK/ERK pathway to regulate cell proliferation, differentiation and survival downstream of receptor tyrosine kinases such as those encoded by tor, Egfr, and sev	negative	all	0.866366	0.436234			DNA breaks
FBgn0029840	raptor	GAGA type 2	direct	GGCCGAGGGTGAGGATGAGCTGATTGAG	raptor (raptor) encodes a crucial component of target of rapamycin (TOR) complex 1, which is a conserved regulator of cell growth and metabolism.	negative	all	0.674322	0.141995
FBgn0041191	Rheb	GAGA type 2	indirect	TCGCAACATCGAGGATGAGCTCTCACGC	Ras homolog enriched in brain (Rheb) encodes a Ras homolog that is the target of the product of gig. It activates the protein kinase encoded by Tor, leading to enlarged cell size	positive	all	1.13971	0.328601
FBgn0041191	Rheb	GAGA type 1	direct	GAAGCGTGAGAGCTCATCCTCGATG	Ras homolog enriched in brain (Rheb) encodes a Ras homolog that is the target of the product of gig. It activates the protein kinase encoded by Tor, leading to enlarged cell size	positive	all	1.13971	0.328601
FBgn0041191	Rheb	GAGA type 1	indirect	ATCGAGGATGAGCTCTCACGCTTCG	Ras homolog enriched in brain (Rheb) encodes a Ras homolog that is the target of the product of gig. It activates the protein kinase encoded by Tor, leading to enlarged cell size	positive	all	1.13971	0.328601
FBgn0017579	RpL14	GAGA type 1	direct	AAGGTCAAGGAGCTCTCCGGCTCCG	Ribosomal protein L14 (RpL14) encodes a component of the large subunit of cytoplasmic ribosomes, which translate mRNAs encoded by the nuclear genome. RpL14 is haploinsufficient - heterozygous mutants display the 'Minute' phenotype, characterized by a slower developmental rate and small adult bristles. Involved in negative regulation of neuron apoptotic process.	negative	development	1.80363	0.000106873
FBgn0034763	RYBP	GAGA type 2	indirect	AATCTTTAAAGAGGATGAGACATGAAAT	Ring and YY1 Binding Protein (RYBP) encodes a ubiquitin interacting protein. It interacts with epigenetic regulators of the Polycomb and trithorax groups to control post-translational histone modifications. The product of RYBP is involved in regulation of the innate immune response and cell death/cell survival, and the control of morphogenesis	negative	all	0.917609	0.440463
FBgn0262579	Sarm	GAGA type 1	direct	ATGTTTCATGAGATCCAATCGATCT	Sterile alpha and Armadillo motif (Sarm) encodes an intracellular signaling molecule that is required for execution of a pro-degenerative pathway after axotomy	positive	all	0.95662	0.85554
FBgn0262579	Sarm	GAGA type 1	indirect	AGAAACAAAGAGAGAGAAATAATTT	Sterile alpha and Armadillo motif (Sarm) encodes an intracellular signaling molecule that is required for execution of a pro-degenerative pathway after axotomy	positive	all	0.95662	0.85554
FBgn0262579	Sarm	GAGA type 1	indirect	AAACAAAGAGAGAGAAATAATTTGT	Sterile alpha and Armadillo motif (Sarm) encodes an intracellular signaling molecule that is required for execution of a pro-degenerative pathway after axotomy	positive	all	0.95662	0.85554
FBgn0002306	sas	GAGA type 2	direct	GAGTGTGGGTGAGAGCGAGCATTCAACC	stranded at second (sas) encodes a single-pass transmembrane protein that localizes to the apical cell surface in polarized epithelia, such as the embryonic/larval salivary gland (SG). Overexpression of sas in the developing SG leads to all membrane domains taking on apical membrane character, with the exception of the region where septate junctions form	negative	development	0.837326	0.23858
FBgn0002306	sas	GAGA type 2	direct	GCTGACGCGCGAGAAGGAGCCAGCCAGA	stranded at second (sas) encodes a single-pass transmembrane protein that localizes to the apical cell surface in polarized epithelia, such as the embryonic/larval salivary gland (SG). Overexpression of sas in the developing SG leads to all membrane domains taking on apical membrane character, with the exception of the region where septate junctions form	negative	development	0.837326	0.23858
FBgn0002306	sas	GAGA type 1	direct	TGTGGGTGAGAGCGAGCATTCAACC	stranded at second (sas) encodes a single-pass transmembrane protein that localizes to the apical cell surface in polarized epithelia, such as the embryonic/larval salivary gland (SG). Overexpression of sas in the developing SG leads to all membrane domains taking on apical membrane character, with the exception of the region where septate junctions form	negative	development	0.837326	0.23858
FBgn0033784	SCCRO3	GAGA type 2	indirect	TGTGAGCGCCGAGTTTGAGCAAAGCTAA	Squamous cell carcinoma-related oncogene 3 (SCCRO3) encodes a protein involved in the regulation of protein neddylation. involved_in positive regulation of apoptotic process	positive	all	0.644693	5.68672e-05
FBgn0004170	scute	GAGA type 1	indirect	GAAACGGGCGAGAGAATCGGAGAGA	scute (sc) is a proneural gene of the achaete-scute complex. It encodes a transcription factor involved in nervous system development, Notch signalling and sex determination	negative	development	#N/A	#N/A
FBgn0004170	scute	GAGA type 1	indirect	AGAGAAAGAGAGAGAGAGAGTGACG	scute (sc) is a proneural gene of the achaete-scute complex. It encodes a transcription factor involved in nervous system development, Notch signalling and sex determination	negative	development	#N/A	#N/A
FBgn0004170	scute	GAGA type 1	indirect	AGAGAGAGAGAGTGACGGCAAGAGC	scute (sc) is a proneural gene of the achaete-scute complex. It encodes a transcription factor involved in nervous system development, Notch signalling and sex determination	negative	development	#N/A	#N/A
FBgn0004170	scute	GAGA type 1	direct	TGGACTGTCGAGTGAGAACAGTTTT	scute (sc) is a proneural gene of the achaete-scute complex. It encodes a transcription factor involved in nervous system development, Notch signalling and sex determination	negative	development	#N/A	#N/A
FBgn0004170	scute	GAGA type 1	indirect	AAGGTATCTGAGTGAGGGCTCTTTT	scute (sc) is a proneural gene of the achaete-scute complex. It encodes a transcription factor involved in nervous system development, Notch signalling and sex determination	negative	development	#N/A	#N/A
FBgn0004170	scute	GAGA type 2	indirect	GAGAATCGGAGAGAAAGAGAGAGAGAGA	scute (sc) is a proneural gene of the achaete-scute complex. It encodes a transcription factor involved in nervous system development, Notch signalling and sex determination	negative	development	#N/A	#N/A
FBgn0004170	scute	GAGA type 2	indirect	CGGAGAGAAAGAGAGAGAGAGAGTGACG	scute (sc) is a proneural gene of the achaete-scute complex. It encodes a transcription factor involved in nervous system development, Notch signalling and sex determination	negative	development	#N/A	#N/A
FBgn0004170	scute	GAGA type 2	indirect	GAGAGAAAGAGAGAGAGAGAGTGACGGC	scute (sc) is a proneural gene of the achaete-scute complex. It encodes a transcription factor involved in nervous system development, Notch signalling and sex determination	negative	development	#N/A	#N/A
FBgn0004170	scute	GAGA type 2	indirect	GAGAAAGAGAGAGAGAGAGTGACGGCAA	scute (sc) is a proneural gene of the achaete-scute complex. It encodes a transcription factor involved in nervous system development, Notch signalling and sex determination	negative	development	#N/A	#N/A
FBgn0004170	scute	GAGA type 2	indirect	GTATCTGAGTGAGGGCTCTTTTTGCTAC	scute (sc) is a proneural gene of the achaete-scute complex. It encodes a transcription factor involved in nervous system development, Notch signalling and sex determination	negative	development	#N/A	#N/A
FBgn0004170	scute	GAGA type 2	direct	TCGAGTACCTGAGACAGAGAAAGAGAGA	scute (sc) is a proneural gene of the achaete-scute complex. It encodes a transcription factor involved in nervous system development, Notch signalling and sex determination	negative	development	#N/A	#N/A
FBgn0004170	scute	GAGA type 2	direct	ACCTGAGACAGAGAAAGAGAGAGAGACT	scute (sc) is a proneural gene of the achaete-scute complex. It encodes a transcription factor involved in nervous system development, Notch signalling and sex determination	negative	development	#N/A	#N/A
FBgn0004170	scute	GAGA type 2	direct	GACAGAGAAAGAGAGAGAGACTACCTGT	scute (sc) is a proneural gene of the achaete-scute complex. It encodes a transcription factor involved in nervous system development, Notch signalling and sex determination	negative	development	#N/A	#N/A
FBgn0041094	scylla	GAGA type 1	indirect	CAAGAGCGCGAGAGAGAGGGATATA	Inhibits cell growth by regulating the Tor pathway upstream of the Tsc1-Tsc2 complex and downstream of Akt1. Acts as cell death activator during head development.	positive	development	1.24195	0.224516
FBgn0041094	scylla	GAGA type 1	indirect	AGAGCGCGAGAGAGAGGGATATAAC	Inhibits cell growth by regulating the Tor pathway upstream of the Tsc1-Tsc2 complex and downstream of Akt1. Acts as cell death activator during head development.	positive	development	1.24195	0.224516
FBgn0041094	scylla	GAGA type 1	indirect	CCCGAATTTGAGAGAAAACCACGAA	Inhibits cell growth by regulating the Tor pathway upstream of the Tsc1-Tsc2 complex and downstream of Akt1. Acts as cell death activator during head development.	positive	development	1.24195	0.224516
FBgn0041094	scylla	GAGA type 1	direct	AGCGCGCATGAGCGAGACGGCGGAC	Inhibits cell growth by regulating the Tor pathway upstream of the Tsc1-Tsc2 complex and downstream of Akt1. Acts as cell death activator during head development.	positive	development	1.24195	0.224516
FBgn0041094	scylla	GAGA type 2	indirect	GCCGGCGAAAGAGCACGAGAGCGCAAGA	Inhibits cell growth by regulating the Tor pathway upstream of the Tsc1-Tsc2 complex and downstream of Akt1. Acts as cell death activator during head development.	positive	development	1.24195	0.224516
FBgn0041094	scylla	GAGA type 2	indirect	AAGAGCGCAAGAGCGCGAGAGAGAGGGA	Inhibits cell growth by regulating the Tor pathway upstream of the Tsc1-Tsc2 complex and downstream of Akt1. Acts as cell death activator during head development.	positive	development	1.24195	0.224516
FBgn0041094	scylla	GAGA type 2	indirect	GCAAGAGCGCGAGAGAGAGGGATATAAC	Inhibits cell growth by regulating the Tor pathway upstream of the Tsc1-Tsc2 complex and downstream of Akt1. Acts as cell death activator during head development.	positive	development	1.24195	0.224516
FBgn0086357	sec61alpha	GAGA type 2	indirect	TGCTAGTGCCGAGAA	Sec61 α subunit (Sec61α) encodes a subunit of the the translocon, a protein-conducting channel that mediates the co-translational transport of nascent polypeptides into the endoplasmic reticulum. It is a subunit of the Sec61 heterotrimer that forms the core of translocon channel.	positive	all	1.44256	0.0176425
FBgn0002573	sens	GAGA type 1	indirect	GTACAAATCGAGCTCTCTTTTTTTT	senseless (sens) encodes a transcription factor that stimulates expression of proneural gene expression. It regulates differentiation of the peripheral nervous system and the R8 photoreceptor.	negative	all	1.51539	0.00909059
FBgn0002573	sens	GAGA type 1	direct	AAAAAAAGAGAGCTCGATTTGTACC	senseless (sens) encodes a transcription factor that stimulates expression of proneural gene expression. It regulates differentiation of the peripheral nervous system and the R8 photoreceptor.	negative	all	1.51539	0.00909059
FBgn0002573	sens	GAGA type 2	indirect	GGTACAAATCGAGCTCTCTTTTTTTTAT	senseless (sens) encodes a transcription factor that stimulates expression of proneural gene expression. It regulates differentiation of the peripheral nervous system and the R8 photoreceptor.	negative	all	1.51539	0.00909059
FBgn0002573	sens	GAGA type 2	indirect	TGGTGGTGGCTCTCGAGAGCCCTGCAAT	senseless (sens) encodes a transcription factor that stimulates expression of proneural gene expression. It regulates differentiation of the peripheral nervous system and the R8 photoreceptor.	negative	all	1.51539	0.00909059
FBgn0002573	sens	GAGA type 2	direct	ATTGCAGGGCTCTCGAGAGCCACCACCA	senseless (sens) encodes a transcription factor that stimulates expression of proneural gene expression. It regulates differentiation of the peripheral nervous system and the R8 photoreceptor.	negative	all	1.51539	0.00909059
FBgn0036786	sickle	GAGA type 1	direct	AGGGCGACAGAGAGAGAGAGAGAAA	sickle (skl) encodes a member of the inhibitor of apoptotic protein antagonists. It is partially involved in the apoptosis of some larval neurons during metamorphosis	positive	all	#N/A	#N/A
FBgn0036786	sickle	GAGA type 1	direct	GGCGACAGAGAGAGAGAGAGAAAGA	sickle (skl) encodes a member of the inhibitor of apoptotic protein antagonists. It is partially involved in the apoptosis of some larval neurons during metamorphosis	positive	all	#N/A	#N/A
FBgn0036786	sickle	GAGA type 1	direct	CGACAGAGAGAGAGAGAGAAAGAGA	sickle (skl) encodes a member of the inhibitor of apoptotic protein antagonists. It is partially involved in the apoptosis of some larval neurons during metamorphosis	positive	all	#N/A	#N/A
FBgn0036786	sickle	GAGA type 1	direct	ACAGAGAGAGAGAGAGAAAGAGAGA	sickle (skl) encodes a member of the inhibitor of apoptotic protein antagonists. It is partially involved in the apoptosis of some larval neurons during metamorphosis	positive	all	#N/A	#N/A
FBgn0036786	sickle	GAGA type 1	direct	AGAGAGAAAGAGAGAGGTAGGAAAA	sickle (skl) encodes a member of the inhibitor of apoptotic protein antagonists. It is partially involved in the apoptosis of some larval neurons during metamorphosis	positive	all	#N/A	#N/A
FBgn0036786	sickle	GAGA type 2	direct	GAGGGCGACAGAGAGAGAGAGAGAAAGA	sickle (skl) encodes a member of the inhibitor of apoptotic protein antagonists. It is partially involved in the apoptosis of some larval neurons during metamorphosis	positive	all	#N/A	#N/A
FBgn0036786	sickle	GAGA type 2	direct	GGGCGACAGAGAGAGAGAGAGAAAGAGA	sickle (skl) encodes a member of the inhibitor of apoptotic protein antagonists. It is partially involved in the apoptosis of some larval neurons during metamorphosis	positive	all	#N/A	#N/A
FBgn0036786	sickle	GAGA type 2	direct	GCGACAGAGAGAGAGAGAGAAAGAGAGA	sickle (skl) encodes a member of the inhibitor of apoptotic protein antagonists. It is partially involved in the apoptosis of some larval neurons during metamorphosis	positive	all	#N/A	#N/A
FBgn0036786	sickle	GAGA type 2	direct	GAGAGAGAGAGAGAAAGAGAGAAAGAGA	sickle (skl) encodes a member of the inhibitor of apoptotic protein antagonists. It is partially involved in the apoptosis of some larval neurons during metamorphosis	positive	all	#N/A	#N/A
FBgn0036786	sickle	GAGA type 2	direct	GAGAGAAAGAGAGAAAGAGAGAGGTAGG	sickle (skl) encodes a member of the inhibitor of apoptotic protein antagonists. It is partially involved in the apoptosis of some larval neurons during metamorphosis	positive	all	#N/A	#N/A
FBgn0283468	slmb	GAGA type 1	direct	CAGAAAACGGAGAGAGCGATCGAGA	supernumerary limbs (slmb) encodes an essential, conserved F-box protein and a component of the SCF (Skp/Cullin/F-box) E3 ubiquitin-ligase, providing substrate specificity to the SCF. It negatively regulates multiple signaling pathways and cellular processes by promoting the proteasome-mediated degradation or cleavage of its targets, including the products of arm and ci (Wg and Hh signaling), SAK…	negative	all	0.757873	0.0144321
FBgn0005613	Sox15	GAGA type 1	direct	AGTGAGACCGAGAGATCGCGAGAGT	Sox box protein 15 (Sox15) encodes a transcription factor that regulates cell proliferation and cell death in the wing disc	negative	development	0.971713	0.972772
FBgn0005613	Sox15	GAGA type 2	direct	TTCTGAAAGTGAGACCGAGAGATCGCGA	Sox box protein 15 (Sox15) encodes a transcription factor that regulates cell proliferation and cell death in the wing disc	negative	development	0.971713	0.972772
FBgn0035379	spz5	GAGA type 2	indirect	CTCGGGAAAAGAGGCAGAGAAAAGCAGA	spatzle 5 Neurotrophin which may function as a ligand for the Toll-related receptors Toll-6 and Toll-7 . Binds to Toll-7 and Toll-6, and probably acts as their ligands in the promotion of motor axon targeting and neuronal survival in the central nervous system (CNS) . Involved in synaptic targeting of ISNb/d motorneurons and also some SNa motorneurons . May be involved in the normal development o…	negative	development	1.64437	0.00113645
FBgn0033051	Strica	GAGA type 2	direct	ATAAAAGAGAGAGTAAGAGCGAACCATA	Ser/Thr-rich caspase (Strica) encodes a member of initiator caspases. It contributes, redundantly or cooperatively with the product of Dronc, to the apoptosis of selective larval neurons during metamorphosis and nurse cells during oogenesis, and competitive apoptosis of heterozygous mutant cells	positive	development	1.37503	0.293142
FBgn0003656	swiss cheese	GAGA type 1	indirect	AGCCCGCTAGAGTGACCATACAAAG	swiss cheese (sws) encodes a transmembrane protein that hydrolyzes phosphatidylcholine and binds to and inhibits the C3 catalytic subunit of protein kinase A. Its loss leads to neuronal and glial degeneration and apoptotic cell death.	negative	development	0.645031	0.00190395
FBgn0026323	Tak1	GAGA type 1	direct	GGGCGGGTAGAGAGAATTAAATAGA	TGF-β activated kinase 1 (Tak1) encodes a MAP kinase kinase kinase that functions downstream of the products of imd, Fadd and Diap2. It also functions upstream of the IKK complex in the Imd pathway, a pathway regulating the antibacterial response and other less characterized cellular processes. Upon activation the product of imd, the product of Tak1 can also activate the JNK pathway at the level …	positive	all	1.68856	0.00301259
FBgn0266579	tau	GAGA type 2	direct	TTTTCTCAACGAGAGAGAGCTTTCGAAA	microtubule-associated protein - delivery of synaptic proteins - vesicular axonal transport - a target for PAR-1 in dendritic pruning - Dendrite severing - regulation of photoreceptor development and progressive neuronal degeneration	negative	all	2.42465	1.36232e-19
FBgn0266579	tau	GAGA type1	direct	TTTCTCAACGAGAGAGAGCTTTCGA	microtubule-associated protein - delivery of synaptic proteins - vesicular axonal transport - a target for PAR-1 in dendritic pruning - Dendrite severing - regulation of photoreceptor development and progressive neuronal degeneration	negative	all	2.42465	1.36232e-19
FBgn0266579	tau	GAGA type 1	direct	TCTCAACGAGAGAGAGCTTTCGAAA	microtubule-associated protein - delivery of synaptic proteins - vesicular axonal transport - a target for PAR-1 in dendritic pruning - Dendrite severing - regulation of photoreceptor development and progressive neuronal degeneration	negative	all	2.42465	1.36232e-19
FBgn0051682	Testis EndoG-Like 1	GAGA type 1	indirect	TGATCGGTAGAGTGATGAAAAAGTG	Predicted to enable endoribonuclease activity and single-stranded DNA endodeoxyribonuclease activity. Predicted to be involved in apoptotic DNA fragmentation. Predicted to be active in mitochondrial inner membrane and nucleus.	positive	all (execution)	0.870718	0.392212
FBgn0051679	Testis EndoG-Like 3	GAGA type 2	direct	GTGGGCCGTGGAGTACGAGATGATCGGA	Predicted to enable endoribonuclease activity and single-stranded DNA endodeoxyribonuclease activity. Predicted to be involved in apoptotic DNA fragmentation. Predicted to be active in mitochondrial inner membrane and nucleus. Orthologous to human ENDOG (endonuclease G).	positive	all (execution)	0.890444	0.410473
FBgn0051679	Testis EndoG-Like 3	GAGA type 2	direct	CGACATCCGGGAGATTGAGCACTACGCA	Predicted to enable endoribonuclease activity and single-stranded DNA endodeoxyribonuclease activity. Predicted to be involved in apoptotic DNA fragmentation. Predicted to be active in mitochondrial inner membrane and nucleus. Orthologous to human ENDOG (endonuclease G).	positive	all (execution)	0.890444	0.410473
FBgn0051679	Testis EndoG-Like 3	GAGA type 2	direct	TCGATGGTTTGAGAAGGAGTGCCCTATT	Predicted to enable endoribonuclease activity and single-stranded DNA endodeoxyribonuclease activity. Predicted to be involved in apoptotic DNA fragmentation. Predicted to be active in mitochondrial inner membrane and nucleus. Orthologous to human ENDOG (endonuclease G).	positive	all (execution)	0.890444	0.410473
FBgn0014073	Tie	GAGA type 2	direct	TTTTAGTAGTGATTAAGAGCAACAACAA	Tie-like receptor tyrosine kinase (Tie) encodes a predicted transmembrane tyrosine kinase receptor. Its potential ligands for include Pvf protein family members. It may be involved in cell survival and cell migration.	negative	development	0.89219	0.507065
FBgn0004436	Ubc6	GAGA type 1	indirect	TTTACAATTGAGCGACATGGCAAAA	Ubiquitin conjugating enzyme 6 (Ubc6) encodes an enzyme that acts together with E3 ubiquitin ligases to transfer ubiquitin to target proteins. involved_in negative regulation of intrinsic apoptotic signaling pathway in response to DNA damage by p53 class mediator	negative	all	1.05066	0.722041
FBgn0035601	Uev1A	GAGA type 2	indirect	TCCAGCGACTGAGTCAGCTCAGTGCCCA	Ubiquitin-conjugating enzyme variant 1A (Uev1A) encodes a conserved protein that contributes to ubiquitin conjugating enzyme activity, but not catalytically, since it lacks the conserved cysteine residue essential for ubiquitin conjugation. It regulates genomic integrity, IMD pathway-mediated innate immunity, JNK-pathway mediated cell death and tumor invasion	positive	all	0.91218	0.428291
FBgn0003965	v	GAGA type 2	indirect	ACCGATAACAGAGCGAGAGAGCTCCAGT	Heme-dependent dioxygenase that catalyzes the oxidative cleavage of the L-tryptophan (L-Trp) pyrrole ring and converts L-tryptophan to N-formyl-L-kynurenine. Catalyzes the oxidative cleavage of the indole moiety (PubMed:23333332). Required during larval growth to control the level of potentially harmful free tryptophan in the hemolymph. In the adult the same reaction is the first step in the ommo…	positive	development	0.763883	0.561513
FBgn0011739	warts	GAGA type 2	indirect	ACATTGTTTTGAGTAAGAATGAAAATAT	warts (wts) encodes a tumor suppressor kinase in the Hippo pathway involved in the control of tissue growth. It also plays a post-mitotic role in R8 photoreceptor cells where it antagonizes the product of melt to control the bistable choice of Rhodospin expression	positive	all	0.693348	0.0129969
FBgn0011739	wts	GAGA type 2	indirect	ACATTGTTTTGAGTAAGAATGAAAATAT	warts (wts) encodes a tumor suppressor kinase in the Hippo pathway involved in the control of tissue growth. It also plays a post-mitotic role in R8 photoreceptor cells where it antagonizes the product of melt to control the bistable choice of Rhodospin expression	positive	all	0.693348	0.0129969
FBgn0016078	wun	GAGA type 2	direct	AATATTACCAGAGAGAGAGAGAGGGTCT	wunen (wun) encodes a lipid phosphate phosphatase with 6 transmembrane domains and an active site that is predicted to face extracellularly. It is required for germ cell migration and survival, septate junction function in the tracheal system and for heart formation	negative	development	1.30504	0.044903
FBgn0016078	wun	GAGA type 2	direct	TATTACCAGAGAGAGAGAGAGGGTCTCT	wunen (wun) encodes a lipid phosphate phosphatase with 6 transmembrane domains and an active site that is predicted to face extracellularly. It is required for germ cell migration and survival, septate junction function in the tracheal system and for heart formation	negative	development	1.30504	0.044903
FBgn0016078	wun	GAGA type 2	direct	TTACCAGAGAGAGAGAGAGGGTCTCTCT	wunen (wun) encodes a lipid phosphate phosphatase with 6 transmembrane domains and an active site that is predicted to face extracellularly. It is required for germ cell migration and survival, septate junction function in the tracheal system and for heart formation	negative	development	1.30504	0.044903
FBgn0041087	wun2	GAGA type 2	indirect	ACTCTCCAGCGAGCTCTCTCATGGATAA	wunen-2 (wun2) encodes a lipid phosphate phosphatase, an enzyme with an active site predicted to face extracellularly. It is required for germ cell migration and survival, acting partially redundantly with its paralog wun	negative	development	1.18495	0.374312
FBgn0041087	wun2	GAGA type 2	direct	TGCGAAGTTTGAGATGGAGTGGGTGTAA	wunen-2 (wun2) encodes a lipid phosphate phosphatase, an enzyme with an active site predicted to face extracellularly. It is required for germ cell migration and survival, acting partially redundantly with its paralog wun	negative	development	1.18495	0.374312
FBgn0041087	wun2	GAGA type 2	direct	ATTTATCCATGAGAGAGCTCGCTGGAGA	wunen-2 (wun2) encodes a lipid phosphate phosphatase, an enzyme with an active site predicted to face extracellularly. It is required for germ cell migration and survival, acting partially redundantly with its paralog wun	negative	development	1.18495	0.374312
				miRNA
				stress
				DNA breaks

## Sheet: programmed cell death_GAF_-500
Fbgn	name	GAGA type	direction	sequence	description	process regulation	time of action	DEG FC	padj
FBgn0262451	bantam	GAGA type 1	indirect	GCGAAGAACGAGAGACTCAAAAGAT	Enables mRNA 3'-UTR binding activity and mRNA binding activity involved in posttranscriptional gene silencing. Involved in several processes, including positive regulation of cell population proliferation; regulation of gene expression; and regulation of signal transduction. involved in negative regulation of apoptotic process	negative	all	#N/A	#N/A
FBgn0262429	mir-13a	GAGA type 2	indirect	GTGAGTGCACGAGTGAGAGAATCTGTGT	Enables mRNA 3'-UTR binding activity and mRNA binding activity involved in posttranscriptional gene silencing. Involved in gene silencing by miRNA and negative regulation of apoptotic process.	negative	all	#N/A	#N/A
FBgn0262447	mir-14	GAGA type 2	direct	CAAATCCAAAGAGAATGAGAGAGCGAAA	a cell death suppressor - regulates fat metabolism - regulates insulin production and metabolism through its target,	negative	all	#N/A	#N/A
FBgn0262447	mir-14	GAGA type 1	direct	AAAGAGAATGAGAGAGCGAAAAAGC	a cell death suppressor - regulates fat metabolism - regulates insulin production and metabolism through its target,	negative	all	#N/A	#N/A
FBgn0262371	mir-263b	GAGA type 2	direct	GGCTCGAATCGAGTGCTAGCGACAGGGA	Enables mRNA 3'-UTR binding activity and mRNA binding activity involved in posttranscriptional gene silencing. Involved in several processes, including positive regulation of locomotor rhythm; regulation of branching morphogenesis of a nerve; and sensory organ development. Is expressed in adult central nervous system; external sensory organ precursor cell; haltere; interommatidial bristle; and se…	negative	all	#N/A	#N/A
FBgn0262403	mir-278	GAGA type 1	indirect	CTGCGAAGTGAGAGAAGTAAATGAA	Involved in female germ-line stem cell asymmetric division and negative regulation of apoptotic process.	negative	all	#N/A	#N/A
FBgn0262377	mir-2a-1	GAGA type 1	indirect	TGACTGCGGGAGTTCAGAATTTTCA	Enables mRNA 3'-UTR binding activity and mRNA binding activity involved in posttranscriptional gene silencing. Involved in gene silencing by miRNA; negative regulation of apoptotic process; and negative regulation of translational initiation. Is expressed in embryonic epidermis; embryonic hindgut; and organism	negative	all	#N/A	#N/A
FBgn0262460	mir-2a-2	GAGA type 1	indirect	TGACTGCGGGAGTTCAGAA	Enables mRNA 3'-UTR binding activity and mRNA binding activity involved in posttranscriptional gene silencing. Involved in gene silencing by miRNA; negative regulation of apoptotic process; and negative regulation of translational initiation.	negative	all	#N/A	#N/A
FBgn0262397	mir-2c	GAGA type 2	indirect	GTGAGTGCACGAGTGAGAGAATCTGTGT	Enables mRNA 3'-UTR binding activity and mRNA binding activity involved in posttranscriptional gene silencing. Involved in gene silencing by miRNA; negative regulation of apoptotic process; and negative regulation of translational initiation. Is expressed in embryonic/larval brain and larval ventral nerve cord.	negative	all	#N/A	#N/A
FBgn0262464	mir-6-1	GAGA type 2	indirect	ACCTTTCTTTGAAAAAGAGACCATACCG	Enables mRNA 3'-UTR binding activity and mRNA binding activity involved in posttranscriptional gene silencing. Involved in gene silencing by miRNA and negative regulation of apoptotic process. Is expressed in dorsal ectoderm and organism.	negative	all	#N/A	#N/A
FBgn0262464	mir-6-1	GAGA type 1	direct	TAAAGTTGCGAGTGAAAATTAAAAT	Enables mRNA 3'-UTR binding activity and mRNA binding activity involved in posttranscriptional gene silencing. Involved in gene silencing by miRNA and negative regulation of apoptotic process. Is expressed in dorsal ectoderm and organism.	negative	all	#N/A	#N/A
FBgn0262410	mir-6-2	GAGA type 1	direct	TAAAGTTGCGAGTGAAAATTAAAAT	Enables mRNA 3'-UTR binding activity and mRNA binding activity involved in posttranscriptional gene silencing. Involved in gene silencing by miRNA and negative regulation of apoptotic process	negative	all	#N/A	#N/A
FBgn0000014	abdominal A	GAGA type 1	indirect	GCTGCCTTTGAGTGAGCGTGTTTCA	abdominal A (abd-A) encodes a homeobox-containing transcription factor component of the bithorax complex. It contributes to the developmental fate of embryonic segments	positive	development	0.607925	0.000682644
FBgn0000014	abdominal A	GAGA type 2	direct	GAGCGGGAAAGAGAGAGAGAACAGCGGC	abdominal A (abd-A) encodes a homeobox-containing transcription factor component of the bithorax complex. It contributes to the developmental fate of embryonic segments	positive	development	0.607925	0.000682644
FBgn0000014	abdominal A	GAGA type 1	direct	CGGGAAAGAGAGAGAGAACAGCGGC	abdominal A (abd-A) encodes a homeobox-containing transcription factor component of the bithorax complex. It contributes to the developmental fate of embryonic segments	positive	development	0.607925	0.000682644
FBgn0000015	Abdominal B	GAGA type 2	direct	GTGTATTTCTGAGTGTGAGTGCGAGTGT	Abdominal B (Abd-B) is one of the three hox genes of the bithorax complex. The product of Abd-B specifies the identity of the posterior abdominal segments, the external genitalia and the gonads. It is also involved in regulating the post-mating-response, involved_in positive regulation of apoptotic process involved in morphogenesis	positive	development	2.68019	1.8931e-06
FBgn0000015	Abdominal B	GAGA type 2	direct	TTCTGAGTGTGAGTGCGAGTGTGAGTGT	Abdominal B (Abd-B) is one of the three hox genes of the bithorax complex. The product of Abd-B specifies the identity of the posterior abdominal segments, the external genitalia and the gonads. It is also involved in regulating the post-mating-response, involved_in positive regulation of apoptotic process involved in morphogenesis	positive	development	2.68019	1.8931e-06
FBgn0000015	Abdominal B	GAGA type 2	direct	GTGTGAGTGCGAGTGTGAGTGTGAGTGG	Abdominal B (Abd-B) is one of the three hox genes of the bithorax complex. The product of Abd-B specifies the identity of the posterior abdominal segments, the external genitalia and the gonads. It is also involved in regulating the post-mating-response, involved_in positive regulation of apoptotic process involved in morphogenesis	positive	development	2.68019	1.8931e-06
FBgn0000015	Abdominal B	GAGA type 2	direct	GTGCGAGTGTGAGTGTGAGTGGGCCATG	Abdominal B (Abd-B) is one of the three hox genes of the bithorax complex. The product of Abd-B specifies the identity of the posterior abdominal segments, the external genitalia and the gonads. It is also involved in regulating the post-mating-response, involved_in positive regulation of apoptotic process involved in morphogenesis	positive	development	2.68019	1.8931e-06
FBgn0028484	Ack	GAGA type 2	indirect	GTATTATTTTTCTTTAGAGAAGATAAAT	Non-receptor tyrosine-protein and serine/threonine-protein Activated Cdc42 kinase (Ack) is implicated in diverse biological functions such as cell survival, cell differentiation, cell growth and proliferation. Essential for male and female fertility (PubMed:22615583, PubMed:23562806). During oogenesis required for the correct temporal assembly, and consequently the catalytic activity of long CTPs…	negative	all	0.584048	2.79005e-05
FBgn0010379	Akt	GAGA type 1	indirect	GATGCCAGAGAGAGACATTATTTAA	Akt kinase (Akt) encodes the core kinase component of the insulin/insulin-like growth factor pathway. It functions downstream of the product of Pi3K92E and is activated by phosphatidylinositol binding and phosphorylation. It regulates cell growth and survival, stress responses and ageing.	negative	all	0.977849	0.877038
FBgn0004569	argos	GAGA type 1	indirect	CTGTGCACTGAGAGAAAATGCTCGA	Regulates cell determination; development of ommatidia and optic lobe. Is a signaling molecule involved in the process of axon pathfinding in the eye. Part of the Ras pathway regulating programmed cell death in pupal eyes; activated by lozenge (lz). Antagonist for the Egfr receptor (gurken). Inhibits Egfr signaling without interacting directly with the receptor, but instead by sequestering the Eg…	positive	development	1.15231	0.680746
FBgn0036255	Atg12	GAGA type 2	indirect	CATCCTGCGCAAGAAAGAGCTACTACAG	Required for autophagy	positive	all	0.846004	0.338371
FBgn0035850	Atg18a	GAGA type 2	indirect	ACCGAATCGTGAGCACGAGCCAGCATAG	Autophagy-related 18a (Atg18a) encodes a protein that regulates autophagy by participating in isolation membrane elongation around cytoplasmic cargoes	positive	all	1.24612	0.095723
FBgn0035850	Atg18a	GAGA type 2	indirect	ACCGAATCGTGAGCACGAGCCAGCATAG	Autophagy-related 18a (Atg18a) encodes a protein that regulates autophagy by participating in isolation membrane elongation around cytoplasmic cargoes	positive	all	1.24612	0.095723
FBgn0035850	Atg18a	GAGA type 1	indirect	ACCGAATCGTGAGCACGAGCCAGCATAG	Autophagy-related 18a (Atg18a) encodes a protein that regulates autophagy by participating in isolation membrane elongation around cytoplasmic cargoes	positive	all	1.24612	0.095723
FBgn0264325	atg6	GAGA type 2	direct	CCAACCCCTTGAGTTCTCTCTTATCAGC	Autophagy-related 6 (Atg6) encodes a component of the Vps34 complex that is required for the formation of PI3P, and functions in vesicle trafficking including autophagy and endocytosis.	positive	all	1.01526	0.923954
FBgn0264325	atg6	GAGA type 1	indirect	AGTAAAAAAGAGAGAAATAACAGAA	Autophagy-related 6 (Atg6) encodes a component of the Vps34 complex that is required for the formation of PI3P, and functions in vesicle trafficking including autophagy and endocytosis.	positive	all	1.01526	0.923954
FBgn0037007	BNIP3	GAGA type 1	direct	GATCTTGTCGAGCGATTTAGTTACA	Predicted to be involved in mitochondrial outer membrane permeabilization and regulation of programmed cell death. Located in nucleus. Is expressed in several structures, including adult head; apoptotic amnioserosa; ectoderm; ectoderm anlage; and extended germ band embryo. Orthologous to several human genes including BNIP3 (BCL2 interacting protein 3)	positive	development	1.34479	0.0636345
FBgn0024250	brinker	GAGA type 2	indirect	GCAGCAGTGGGAGAGAGAGTGAGAGGGG	brinker (brk) encodes a transcriptional repressor that plays important roles in the development of many tissues, including most imaginal discs, where its expression is negatively regulated by Dpp signaling. It is involved in the regulation of apoptotic process	positive	development	1.51995	0.413745
FBgn0024250	brinker	GAGA type 2	indirect	CAGTGGGAGAGAGAGTGAGAGGGGGAGC	brinker (brk) encodes a transcriptional repressor that plays important roles in the development of many tissues, including most imaginal discs, where its expression is negatively regulated by Dpp signaling. It is involved in the regulation of apoptotic process	positive	development	1.51995	0.413745
FBgn0024250	brinker	GAGA type 2	indirect	GTGGGAGAGAGAGTGAGAGGGGGAGCTA	brinker (brk) encodes a transcriptional repressor that plays important roles in the development of many tissues, including most imaginal discs, where its expression is negatively regulated by Dpp signaling. It is involved in the regulation of apoptotic process	positive	development	1.51995	0.413745
FBgn0024250	brinker	GAGA type 2	indirect	GAGAGAGTGAGAGGGGGAGCTAGAGAGC	brinker (brk) encodes a transcriptional repressor that plays important roles in the development of many tissues, including most imaginal discs, where its expression is negatively regulated by Dpp signaling. It is involved in the regulation of apoptotic process	positive	development	1.51995	0.413745
FBgn0024250	brinker	GAGA type 2	indirect	GTGAGAGGGGGAGCTAGAGAGCGAGCAA	brinker (brk) encodes a transcriptional repressor that plays important roles in the development of many tissues, including most imaginal discs, where its expression is negatively regulated by Dpp signaling. It is involved in the regulation of apoptotic process	positive	development	1.51995	0.413745
FBgn0024250	brinker	GAGA type 2	indirect	GGGGGAGCTAGAGAGCGAGCAACAGAGA	brinker (brk) encodes a transcriptional repressor that plays important roles in the development of many tissues, including most imaginal discs, where its expression is negatively regulated by Dpp signaling. It is involved in the regulation of apoptotic process	positive	development	1.51995	0.413745
FBgn0024250	brinker	GAGA type 2	indirect	GCGAGCAACAGAGAGAGAGCGCATGGCG	brinker (brk) encodes a transcriptional repressor that plays important roles in the development of many tissues, including most imaginal discs, where its expression is negatively regulated by Dpp signaling. It is involved in the regulation of apoptotic process	positive	development	1.51995	0.413745
FBgn0024250	brinker	GAGA type 1	indirect	CAGCAGTGGGAGAGAGAGTGAGAGG	brinker (brk) encodes a transcriptional repressor that plays important roles in the development of many tissues, including most imaginal discs, where its expression is negatively regulated by Dpp signaling. It is involved in the regulation of apoptotic process	positive	development	1.51995	0.413745
FBgn0040491	Buffy	GAGA type 1	indirect	AAGAAGTAGGAGTGAGGTTAACAAC	Buffy (Buffy) encodes one of the two Bcl-2 family members in Drosophila (the other being the product of Debcl). Its loss has been linked to altered energy metabolism in larvae.Predicted to enable protein heterodimerization activity and protein homodimerization activity. Involved in several processes, including ectopic germ cell programmed cell death; positive regulation of macroautophagy? responc…	negative	all	2.77638	1.90696e-08
FBgn0000253	Cam	GAGA type 2	direct	TCGTTCTCGCGAGAGCGAGAGCGGTTAT	Calmodulin (Cam) encodes a Calcium-binding messenger protein. It acts as a part of the calcium signal transduction pathway and interacts with various target proteins such as kinases or phosphatases. It is involved in actin filament-based movement, mitotic spinde assembly, axon guidance, DNA damage response, autophagy, cell death, sensory perception, and muscle homeostasis	positive	all	1.05586	0.664022
FBgn0000253	Cam	GAGA type 2	direct	GTTCTCGCGAGAGCGAGAGCGGTTATTG	Calmodulin (Cam) encodes a Calcium-binding messenger protein. It acts as a part of the calcium signal transduction pathway and interacts with various target proteins such as kinases or phosphatases. It is involved in actin filament-based movement, mitotic spinde assembly, axon guidance, DNA damage response, autophagy, cell death, sensory perception, and muscle homeostasis	positive	all	1.05586	0.664022
FBgn0029093	cathepsin D	GAGA type 1	indirect	TTTTGATTAGAGAGATTCGATAGTT	cathD (cathD) encodes a protein involved in apoptosis and the defense response to Gram-negative bacteria. nurse cell apoptotic process	positive (non-apoptotic!)	development	1.07638	0.588749
FBgn0013762	Cdk5	GAGA type 1	indirect	AATGCAGCTGAGCGACAAGGATTTG	Cyclin-dependent kinase 5 (Cdk5) encodes a protein serine-threonine kinase of the cyclin-dependent kinase family whose activity is largely restricted to post-mitotic neurons. It is required for synaptic homeostasis and fidelity of axon patterning, and altered activity causes adult-onset neurodegeneration. involved_in intrinsic apoptotic signaling pathway in response to endoplasmic reticulum stress	positive	all	0.930606	0.655902
FBgn0263237	Cdk7	GAGA type 1	direct	AATCGCATAGAGCGACTTCTTTAGC	Cyclin-dependent kinase 7 (Cdk7) encodes a serine/threonine protein kinase whose activity depends on the regulatory subunits encoded by CycH and Mat1. This trimeric Cdk complex activates other Cdks by phosphorylation in their T-loop and is called Cdk activating kinase (CAK). CAK can also be part of TFIIH, where the product of Cdk7 phosphorylates different transcription substrates (e.g. CTD of Pol…	positive	development	0.905629	0.59814
FBgn0033971	CG10209	GAGA type 1	indirect	ACCATCCTTGAGAGACACAATCAAG	CG10209 encodes a DNA binding nuclear apoptosis-inducing factor involved in the apoptotic process.	positive	all	0.93627	0.670077
FBgn0033985	CG10257	GAGA type 2	indirect	GTGTGGATATGAGGCTGAGTGTGTGTAC	Predicted to be involved in I-kappaB kinase/NF-kappaB signaling; negative regulation of extrinsic apoptotic signaling pathway via death domain receptors; and positive regulation of neurogenesis. Is expressed in eye.	negative	all, development	1.79844	0.518052
FBgn0036323	CG14118	GAGA type 2	direct	ACGAAAGAGAGAGCGAGAGAGAGAGAGA	Predicted to enable endoribonuclease activity and single-stranded DNA endodeoxyribonuclease activity. Predicted to be involved in apoptotic DNA fragmentation. Predicted to be active in mitochondrial inner membrane and nucleus.	positive	all (execution)	0.308096	0.00207281
FBgn0036323	CG14118	GAGA type 2	direct	AAGAGAGAGCGAGAGAGAGAGAGAGATG	Predicted to enable endoribonuclease activity and single-stranded DNA endodeoxyribonuclease activity. Predicted to be involved in apoptotic DNA fragmentation. Predicted to be active in mitochondrial inner membrane and nucleus.	positive	all (execution)	0.308096	0.00207281
FBgn0036323	CG14118	GAGA type 2	direct	GAGAGAGCGAGAGAGAGAGAGAGATGTA	Predicted to enable endoribonuclease activity and single-stranded DNA endodeoxyribonuclease activity. Predicted to be involved in apoptotic DNA fragmentation. Predicted to be active in mitochondrial inner membrane and nucleus.	positive	all (execution)	0.308096	0.00207281
FBgn0036323	CG14118	GAGA type 2	direct	GAGAGCGAGAGAGAGAGAGAGATGTAAG	Predicted to enable endoribonuclease activity and single-stranded DNA endodeoxyribonuclease activity. Predicted to be involved in apoptotic DNA fragmentation. Predicted to be active in mitochondrial inner membrane and nucleus.	positive	all (execution)	0.308096	0.00207281
FBgn0036323	CG14118	GAGA type 2	direct	GAGCGAGAGAGAGAGAGAGATGTAAGAT	Predicted to enable endoribonuclease activity and single-stranded DNA endodeoxyribonuclease activity. Predicted to be involved in apoptotic DNA fragmentation. Predicted to be active in mitochondrial inner membrane and nucleus.	positive	all (execution)	0.308096	0.00207281
FBgn0036323	CG14118	GAGA type 2	direct	AAACGAAAGAGAGAGCGAGAGAGAGAGA	Predicted to enable endoribonuclease activity and single-stranded DNA endodeoxyribonuclease activity. Predicted to be involved in apoptotic DNA fragmentation. Predicted to be active in mitochondrial inner membrane and nucleus.	positive	all (execution)	0.308096	0.00207281
FBgn0036323	CG14118	GAGA type 2	direct	ACGAAAGAGAGAGCGAGAGAGAGAGAGA	Predicted to enable endoribonuclease activity and single-stranded DNA endodeoxyribonuclease activity. Predicted to be involved in apoptotic DNA fragmentation. Predicted to be active in mitochondrial inner membrane and nucleus.	positive	all (execution)	0.308096	0.00207281
FBgn0036323	CG14118	GAGA type 2	direct	AAGAGAGAGCGAGAGAGAGAGAGAGATG	Predicted to enable endoribonuclease activity and single-stranded DNA endodeoxyribonuclease activity. Predicted to be involved in apoptotic DNA fragmentation. Predicted to be active in mitochondrial inner membrane and nucleus.	positive	all (execution)	0.308096	0.00207281
FBgn0036323	CG14118	GAGA type 2	direct	GAGAGAGCGAGAGAGAGAGAGAGATGTA	Predicted to enable endoribonuclease activity and single-stranded DNA endodeoxyribonuclease activity. Predicted to be involved in apoptotic DNA fragmentation. Predicted to be active in mitochondrial inner membrane and nucleus.	positive	all (execution)	0.308096	0.00207281
FBgn0036323	CG14118	GAGA type 2	direct	GAGAGCGAGAGAGAGAGAGAGATGTAAG	Predicted to enable endoribonuclease activity and single-stranded DNA endodeoxyribonuclease activity. Predicted to be involved in apoptotic DNA fragmentation. Predicted to be active in mitochondrial inner membrane and nucleus.	positive	all (execution)	0.308096	0.00207281
FBgn0036323	CG14118	GAGA type 2	direct	GAGCGAGAGAGAGAGAGAGATGTAAGAT	Predicted to enable endoribonuclease activity and single-stranded DNA endodeoxyribonuclease activity. Predicted to be involved in apoptotic DNA fragmentation. Predicted to be active in mitochondrial inner membrane and nucleus.	positive	all (execution)	0.308096	0.00207281
FBgn0036323	CG14118	GAGA type 1	direct	TTATTCTCAGAGAGATTACAAGACA	Predicted to enable endoribonuclease activity and single-stranded DNA endodeoxyribonuclease activity. Predicted to be involved in apoptotic DNA fragmentation. Predicted to be active in mitochondrial inner membrane and nucleus.	positive	all (execution)	0.308096	0.00207281
FBgn0040650	CG15456	GAGA type 1	direct	CGATATTCAGAGCGATAACGACAGC	Predicted to be involved in negative regulation of apoptotic process; positive regulation of filopodium assembly; and response to selenium ion. Predicted to be active in cytosol. Orthologous to human MIEN1 (migration and invasion enhancer 1).	negative	all	1.54067	0.0143319
FBgn0030163	CG1791	GAGA type 1	indirect	TAATCAATCGAGTGACCTTTGTTTC	Predicted to enable transmembrane receptor protein tyrosine kinase activator activity. Predicted to be involved in negative regulation of apoptotic process. Predicted to be active in collagen-containing extracellular matrix and extracellular space. Human ortholog(s) of this gene implicated in familial hypobetalipoproteinemia 2. Orthologous to human ANGPTL3 (angiopoietin like 3) and ANGPTL4 (angio…	negative	all	#N/A	#N/A
FBgn0031384	CG4238	GAGA type 1	direct	GTGGAACCTGAGTGAAAATTTTTTA	Predicted to enable ubiquitin protein ligase activity. Predicted to be involved in cellular protein metabolic process; negative regulation of apoptotic process; and positive regulation of protein catabolic process. Predicted to be located in cytosol. Predicted to be active in cytoplasm. Is expressed in adult head. Orthologous to human AREL1 (apoptosis resistant E3 ubiquitin protein ligase 1)	negative	all	0.599519	1.3963e-06
FBgn0002174	CG5504	GAGA type 2	direct	TGAAGGCACTGAGCACTAGCACATACGG	May act as a tumor suppressor in larval imaginal disks	positive	all	0.684229	8.48623e-05
FBgn0036887	CG9231	GAGA type 1	indirect	GGTCACCCTGAGAGACGTTCACACT	Predicted to be involved in cellular response to hypoxia; positive regulation of apoptotic process; and positive regulation of release of cytochrome c from mitochondria. Predicted to be located in cytosol and mitochondrion. Is expressed in adult head; adult heart; embryonic/larval midgut; gastric caecum; and organism. Orthologous to several human genes including FAM162A (family with sequence simi…	positive	all	0.894838	0.343325
FBgn0024732	Drep1	GAGA type 1	direct	ATTCAGCGAGAGAGAACGTGTTTTT	DNA fragmentation factor-related protein 1 (Drep1) encodes a protein that regulates apoptosis. Predicted to enable deoxyribonuclease inhibitor activity. Involved in negative regulation of apoptotic process and nurse cell apoptotic process.	negative	all	1.24961	0.308803
FBgn0036165	charybde	GAGA type 2	direct	AAACACTCAAGAGAGCGAGCCGCTCAAC	Inhibits cell growth by regulating the Tor pathway upstream of the Tsc1-Tsc2 complex and downstream of Akt1. Acts as cell death activator during head development. Involved in several processes, including head involution; regulation of TOR signaling; and response to oxidative stress. Predicted to be located in cytoplasm. Is expressed in several structures, including adult brain; ectoderm anlage; e…	positive	development	0.960447	0.87002
FBgn0036165	charybde	GAGA type 1	direct	CACTCAAGAGAGCGAGCCGCTCAAC	Inhibits cell growth by regulating the Tor pathway upstream of the Tsc1-Tsc2 complex and downstream of Akt1. Acts as cell death activator during head development. Involved in several processes, including head involution; regulation of TOR signaling; and response to oxidative stress. Predicted to be located in cytoplasm. Is expressed in several structures, including adult brain; ectoderm anlage; e…	positive	development	0.960447	0.87002
FBgn0023076	Clock	GAGA type 1	indirect	CAGAGGGTCTCTCTCGGATCGGATA	Circadian regulator that acts as a transcription factor and generates a rhythmic output with a period of about 24 hours. Oscillates in antiphase to the cycling observed for period (PER) and timeless (TIM).	negative	all	1.03974	0.864392
FBgn0030028	Companion of reaper	GAGA type 2	direct	CATTCAATGTGAGCACGAGCGAACACAC	Companion of reaper (Corp) is a gene that is transcriptionally induced following DNA damage. It may function to inhibit the pro-apoptotic activity of the transcriptional factor encoded by p53.	negative	all	2.86234	8.14446e-06
FBgn0030028	Companion of reaper	GAGA type 1	indirect	TGGCAATTGGAGAGAGTAAAAAAGA	Companion of reaper (Corp) is a gene that is transcriptionally induced following DNA damage. It may function to inhibit the pro-apoptotic activity of the transcriptional factor encoded by p53.	negative	all	2.86234	8.14446e-06
FBgn0010382	Cyclin E	GAGA type 2	indirect	CGCAAAGAGAGAGTCGGAGTTTAGTGGC	Essential for the control of the cell cycle at the G1/S (start) transition. Targeted by archipelago for degradation by the SFC ubiquitin ligase complex	positive	?	0.592354	5.09728e-06
FBgn0010382	Cyclin E	GAGA type 1	indirect	CGGCGCAAAGAGAGAGTCGGAGTTT	Essential for the control of the cell cycle at the G1/S (start) transition. Targeted by archipelago for degradation by the SFC ubiquitin ligase complex	positive	?	0.592354	5.09728e-06
FBgn0086907	Cytochrome c distal	GAGA type 2	direct	AATCGACGATGAGAAAGAGAGACTCGCA	Cytochrome c distal is a Electron carrier protein. The oxidized form of the cytochrome c heme group can accept an electron from the heme group of the cytochrome c1 subunit of cytochrome reductase. Cytochrome c then transfers this electron to the cytochrome oxidase complex, the final protein carrier in the mitochondrial electron-transport chain	positive	all	0.915856	0.590434
FBgn0086907	Cytochrome c distal	GAGA type 1	direct	GATGAGAAAGAGAGACTCGCAGGAA	Cytochrome c distal is a Electron carrier protein. The oxidized form of the cytochrome c heme group can accept an electron from the heme group of the cytochrome c1 subunit of cytochrome reductase. Cytochrome c then transfers this electron to the cytochrome oxidase complex, the final protein carrier in the mitochondrial electron-transport chain	positive	all	0.915856	0.590434
FBgn0028381	Decay	GAGA type 2	direct	ATACCGCGGCGAGCGAGAGAAGAATCCA	Death executioner caspase related to Apopain/Yama (Decay) encodes one of the seven members of the caspase family of cysteine proteases. It has substrate specificity similar to the effector caspases encoded by Drice and Dcp-1. involved in the programmed cell death	positive	development (execution)	1.16404	0.792788
FBgn0028381	Decay	GAGA type 2	direct	AGGCGAACGGGAGCGAGAGCTTTTTTTT	Death executioner caspase related to Apopain/Yama (Decay) encodes one of the seven members of the caspase family of cysteine proteases. It has substrate specificity similar to the effector caspases encoded by Drice and Dcp-1. involved in the programmed cell death	positive	development (execution)	1.16404	0.792788
FBgn0028381	Decay	GAGA type 2	direct	ATACCGCGGCGAGCGAGAGAAGAATCCA	Death executioner caspase related to Apopain/Yama (Decay) encodes one of the seven members of the caspase family of cysteine proteases. It has substrate specificity similar to the effector caspases encoded by Drice and Dcp-1. involved in the programmed cell death	positive	development (execution)	1.16404	0.792788
FBgn0028381	Decay	GAGA type 2	direct	AGGCGAACGGGAGCGAGAGCTTTTTTTT	Death executioner caspase related to Apopain/Yama (Decay) encodes one of the seven members of the caspase family of cysteine proteases. It has substrate specificity similar to the effector caspases encoded by Drice and Dcp-1. involved in the programmed cell death	positive	development (execution)	1.16404	0.792788
FBgn0028381	Decay	GAGA type 1	direct	GCGGCGAGCGAGAGAAGAATCCACC	Death executioner caspase related to Apopain/Yama (Decay) encodes one of the seven members of the caspase family of cysteine proteases. It has substrate specificity similar to the effector caspases encoded by Drice and Dcp-1. involved in the programmed cell death	positive	development (execution)	1.16404	0.792788
FBgn0028381	Decay	GAGA type 1	direct	ATACCGCGGCGAGCGAGAGAAGAATCCA	Death executioner caspase related to Apopain/Yama (Decay) encodes one of the seven members of the caspase family of cysteine proteases. It has substrate specificity similar to the effector caspases encoded by Drice and Dcp-1. involved in the programmed cell death	positive	development (execution)	1.16404	0.792788
FBgn0267972	Derlin-1	GAGA type 1	direct	AAATGACTTGAGTTCTTTAAGAACA	Derlin-1 (Der-1) encodes a transmembrane protein in the endoplasmic reticulum (ER) that is required for the retro-translocation of misfolded ER proteins to the cytoplasm for ubiquitin-mediated protein degradation. This process is referred to as "ER-Associated Degradation". Involved in positive regulation of apoptotic process and response to endoplasmic reticulum stress.	positive	all	0.621279	2.75178e-06
FBgn0015247	Diap-2	GAGA type 2	indirect	GCGGGATATCGAGAATGAGACAGCATCC	Death-associated inhibitor of apoptosis 2 (Diap2) encodes a protein with ubiquitin E3-ligase activity that functions in the Imd pathway by conjugating the product of imd with K63-polyubiquitin chai	negative	all	0.938262	0.617858
FBgn0015247	Diap-2	GAGA type 2	indirect	GCGGGATATCGAGAATGAGACAGCATCC	Death-associated inhibitor of apoptosis 2 (Diap2) encodes a protein with ubiquitin E3-ligase activity that functions in the Imd pathway by conjugating the product of imd with K63-polyubiquitin chai	negative	all	0.938262	0.617858
FBgn0015247	Diap-2	GAGA type 1	indirect	GCGGGATATCGAGAATGAGACAGCATCC	Death-associated inhibitor of apoptosis 2 (Diap2) encodes a protein with ubiquitin E3-ligase activity that functions in the Imd pathway by conjugating the product of imd with K63-polyubiquitin chai	negative	all	0.938262	0.617858
FBgn0000463	Dl	GAGA type 2	direct	AGAGAAATGAGAGAGCGAGTACGTTTCG	AGAGAAATGAGAGAGCGAGTACGTTTCG	positive	development	0.941887	0.78877
FBgn0015664	Dref	GAGA type 1	direct	CCCCCGGCCGAGCGAGAAATTTCCC	DNA replication-related element factor (Dref) encodes a BED finger-type transcription factor that binds to the DRE sequence (TATCGATA). The Dref product is involved in tumor suppressor, TOR, JNK and EGFR signalling pathways. It also plays a role in chromatin organization including insulator function, chromatin remodeling, and telomere maintenance	positive	all	0.873749	0.515602
FBgn0024732	Drep1	GAGA type 2	indirect	TTCGAACTGCGAGTGCTCGCTTTTAAAT	DNA fragmentation factor-related protein 1 (Drep1) encodes a protein that regulates apoptosis. Predicted to enable deoxyribonuclease inhibitor activity. Involved in negative regulation of apoptotic process and nurse cell apoptotic process.	negative	all	1.24961	0.308803
FBgn0024732	Drep1	GAGA type 1	direct	ATATTCAGCGAGAGAGAACGTGTTT	DNA fragmentation factor-related protein 1 (Drep1) encodes a protein that regulates apoptosis. Predicted to enable deoxyribonuclease inhibitor activity. Involved in negative regulation of apoptotic process and nurse cell apoptotic process.	negative	all	1.24961	0.308803
FBgn0028407	Drep3	GAGA type 1	indirect	AGGCAAAGAGAGAGAGAGAGAGAGA	DNA fragmentation factor-related protein 3 (Drep3) encodes a CIDE domain containing protein that can interact with the proteins encoded by Drep2 and Drep4 via CIDE-CIDE interaction. Predicted to be involved in regulation of apoptotic process.	negative	all	1.22925	0.114976
FBgn0028407	Drep3	GAGA type 1	indirect	GCAAAGAGAGAGAGAGAGAGAGAGA	DNA fragmentation factor-related protein 3 (Drep3) encodes a CIDE domain containing protein that can interact with the proteins encoded by Drep2 and Drep4 via CIDE-CIDE interaction. Predicted to be involved in regulation of apoptotic process.	negative	all	1.22925	0.114976
FBgn0028407	Drep3	GAGA type 1	indirect	AAAGAGAGAGAGAGAGAGAGAGAGC	DNA fragmentation factor-related protein 3 (Drep3) encodes a CIDE domain containing protein that can interact with the proteins encoded by Drep2 and Drep4 via CIDE-CIDE interaction. Predicted to be involved in regulation of apoptotic process.	negative	all	1.22925	0.114976
FBgn0028407	Drep3	GAGA type 1	indirect	AGAGAGAGAGAGAGAGAGAGCGAGC	DNA fragmentation factor-related protein 3 (Drep3) encodes a CIDE domain containing protein that can interact with the proteins encoded by Drep2 and Drep4 via CIDE-CIDE interaction. Predicted to be involved in regulation of apoptotic process.	negative	all	1.22925	0.114976
FBgn0028407	Drep3	GAGA type 1	indirect	AGAGAGAGAGAGCGAGCGCTCTGTT	DNA fragmentation factor-related protein 3 (Drep3) encodes a CIDE domain containing protein that can interact with the proteins encoded by Drep2 and Drep4 via CIDE-CIDE interaction. Predicted to be involved in regulation of apoptotic process.	negative	all	1.22925	0.114976
FBgn0028407	Drep3	GAGA type 2	indirect	GAGGCAAAGAGAGAGAGAGAGAGAGAGA	DNA fragmentation factor-related protein 3 (Drep3) encodes a CIDE domain containing protein that can interact with the proteins encoded by Drep2 and Drep4 via CIDE-CIDE interaction. Predicted to be involved in regulation of apoptotic process.	negative	all	1.22925	0.114976
FBgn0028407	Drep3	GAGA type 2	indirect	GGCAAAGAGAGAGAGAGAGAGAGAGAGC	DNA fragmentation factor-related protein 3 (Drep3) encodes a CIDE domain containing protein that can interact with the proteins encoded by Drep2 and Drep4 via CIDE-CIDE interaction. Predicted to be involved in regulation of apoptotic process.	negative	all	1.22925	0.114976
FBgn0028407	Drep3	GAGA type 2	indirect	CAAAGAGAGAGAGAGAGAGAGAGAGCGA	DNA fragmentation factor-related protein 3 (Drep3) encodes a CIDE domain containing protein that can interact with the proteins encoded by Drep2 and Drep4 via CIDE-CIDE interaction. Predicted to be involved in regulation of apoptotic process.	negative	all	1.22925	0.114976
FBgn0028407	Drep3	GAGA type 2	indirect	AAGAGAGAGAGAGAGAGAGAGAGCGAGC	DNA fragmentation factor-related protein 3 (Drep3) encodes a CIDE domain containing protein that can interact with the proteins encoded by Drep2 and Drep4 via CIDE-CIDE interaction. Predicted to be involved in regulation of apoptotic process.	negative	all	1.22925	0.114976
FBgn0028407	Drep3	GAGA type 2	indirect	GAGAGAGAGAGAGAGAGAGAGCGAGCGC	DNA fragmentation factor-related protein 3 (Drep3) encodes a CIDE domain containing protein that can interact with the proteins encoded by Drep2 and Drep4 via CIDE-CIDE interaction. Predicted to be involved in regulation of apoptotic process.	negative	all	1.22925	0.114976
FBgn0028407	Drep3	GAGA type 2	indirect	GAGAGAGAGAGAGAGAGAGCGAGCGCTC	DNA fragmentation factor-related protein 3 (Drep3) encodes a CIDE domain containing protein that can interact with the proteins encoded by Drep2 and Drep4 via CIDE-CIDE interaction. Predicted to be involved in regulation of apoptotic process.	negative	all	1.22925	0.114976
FBgn0028407	Drep3	GAGA type 2	indirect	GAGAGAGAGAGAGAGCGAGCGCTCTGTT	DNA fragmentation factor-related protein 3 (Drep3) encodes a CIDE domain containing protein that can interact with the proteins encoded by Drep2 and Drep4 via CIDE-CIDE interaction. Predicted to be involved in regulation of apoptotic process.	negative	all	1.22925	0.114976
FBgn0283531	Duox	GAGA type 2	direct	GAGCCCCAAAGAGCGGGAGCGAGGCCAC	Plays a role in innate immunity limiting microbial proliferation in the gut (PubMed:16272120, PubMed:25639794). Acts downstream of a hh-signaling pathway to induce the production of reactive oxygen species (ROS) in response to intestinal bacterial infection (PubMed:25639794). May generate antimicrobial oxidative burst through its peroxidase-like domain	negative	all	0.618829	0.0171167
FBgn0283531	Duox	GAGA type 1	direct	GACCGATTCGAGCTCCAACACGGAT	Plays a role in innate immunity limiting microbial proliferation in the gut (PubMed:16272120, PubMed:25639794). Acts downstream of a hh-signaling pathway to induce the production of reactive oxygen species (ROS) in response to intestinal bacterial infection (PubMed:25639794). May generate antimicrobial oxidative burst through its peroxidase-like domain	negative	all	0.618829	0.0171167
FBgn0283531	Duox	GAGA type 1	indirect	TCCGTGTTGGAGCTCGAATCGGTCC	Plays a role in innate immunity limiting microbial proliferation in the gut (PubMed:16272120, PubMed:25639794). Acts downstream of a hh-signaling pathway to induce the production of reactive oxygen species (ROS) in response to intestinal bacterial infection (PubMed:25639794). May generate antimicrobial oxidative burst through its peroxidase-like domain	negative	all	0.618829	0.0171167
FBgn0263933	ebi	GAGA type 2	indirect	AAGCTCCAGCGAGTTGGAGTTCCATAAA	ebi (ebi) encodes a nuclear-localized protein that regulates Egfr, Notch and Wg signaling pathways. ebi encoded product contributes to multiple processes including wing growth and eye development as well as regulation of transcription and innate immune response.	negative	development	0.820872	0.181483
FBgn0263933	ebi	GAGA type 1	direct	ATGGACGAAGAGAGACGACAATTCG	ebi (ebi) encodes a nuclear-localized protein that regulates Egfr, Notch and Wg signaling pathways. ebi encoded product contributes to multiple processes including wing growth and eye development as well as regulation of transcription and innate immune response.	negative	development	0.820872	0.181483
FBgn0000542	ec	GAGA type 1	indirect	GCGATGGTGGAGAGACGAGATGGTG	echinus (ec) encodes a protein phosphatase 1 (PP1) binding protein involved in interommatidial cell sorting and cell death.	positive	development	0.8701	0.537762
FBgn0000546	Ecdysone receptor	GAGA type 2	direct	AAACTGCGTTGAGAGCGAGCCAAAGCGT	Ecdysone receptor (EcR) encodes a protein that interacts with the product of usp to form the nuclear ecdysone receptor heterodimer, which modulates, in conjunction with co-activators and co-repressors, the activities of hundreds of genes in a tissue- and stage-specific way. EcR is widely expressed in embryonic and larval tissues and in some adult tissues where its activities (modulated by the hor…	positive	all, development	0.962577	0.922007
FBgn0003731	Egfr	GAGA type 1	direct	TGCGAGCGAGAGAGAGAGAGCGAAG	Epidermal growth factor receptor (Egfr) encodes the transmembrane tyrosine kinase receptor for signaling ligands (encoded by grk, spi, vn, and Krn) in the TGFα family, which utilises the intracellular MAP kinase pathway. The product of Egfr contributes to growth regulation, cell survival and developmental patterning.	negative	all	0.698199	0.0636001
FBgn0003731	Egfr	GAGA type 1	direct	CGAGCGAGAGAGAGAGAGCGAAGTT	Epidermal growth factor receptor (Egfr) encodes the transmembrane tyrosine kinase receptor for signaling ligands (encoded by grk, spi, vn, and Krn) in the TGFα family, which utilises the intracellular MAP kinase pathway. The product of Egfr contributes to growth regulation, cell survival and developmental patterning.	negative	all	0.698199	0.0636001
FBgn0003731	Egfr	GAGA type 1	direct	AGCGAGAGAGAGAGAGCGAAGTTCG	Epidermal growth factor receptor (Egfr) encodes the transmembrane tyrosine kinase receptor for signaling ligands (encoded by grk, spi, vn, and Krn) in the TGFα family, which utilises the intracellular MAP kinase pathway. The product of Egfr contributes to growth regulation, cell survival and developmental patterning.	negative	all	0.698199	0.0636001
FBgn0003731	Egfr	GAGA type 1	direct	TCGAACATCGAGCGAAACGGGCAAA	Epidermal growth factor receptor (Egfr) encodes the transmembrane tyrosine kinase receptor for signaling ligands (encoded by grk, spi, vn, and Krn) in the TGFα family, which utilises the intracellular MAP kinase pathway. The product of Egfr contributes to growth regulation, cell survival and developmental patterning.	negative	all	0.698199	0.0636001
FBgn0003731	Egfr	GAGA type 2	direct	AACTTGTTGCGAGCGAGAGAGAGAGAGC	Epidermal growth factor receptor (Egfr) encodes the transmembrane tyrosine kinase receptor for signaling ligands (encoded by grk, spi, vn, and Krn) in the TGFα family, which utilises the intracellular MAP kinase pathway. The product of Egfr contributes to growth regulation, cell survival and developmental patterning.	negative	all	0.698199	0.0636001
FBgn0003731	Egfr	GAGA type 2	direct	TGTTGCGAGCGAGAGAGAGAGAGCGAAG	Epidermal growth factor receptor (Egfr) encodes the transmembrane tyrosine kinase receptor for signaling ligands (encoded by grk, spi, vn, and Krn) in the TGFα family, which utilises the intracellular MAP kinase pathway. The product of Egfr contributes to growth regulation, cell survival and developmental patterning.	negative	all	0.698199	0.0636001
FBgn0003731	Egfr	GAGA type 2	direct	TTGCGAGCGAGAGAGAGAGAGCGAAGTT	Epidermal growth factor receptor (Egfr) encodes the transmembrane tyrosine kinase receptor for signaling ligands (encoded by grk, spi, vn, and Krn) in the TGFα family, which utilises the intracellular MAP kinase pathway. The product of Egfr contributes to growth regulation, cell survival and developmental patterning.	negative	all	0.698199	0.0636001
FBgn0003731	Egfr	GAGA type 2	direct	GCGAGCGAGAGAGAGAGAGCGAAGTTCG	Epidermal growth factor receptor (Egfr) encodes the transmembrane tyrosine kinase receptor for signaling ligands (encoded by grk, spi, vn, and Krn) in the TGFα family, which utilises the intracellular MAP kinase pathway. The product of Egfr contributes to growth regulation, cell survival and developmental patterning.	negative	all	0.698199	0.0636001
FBgn0033483	eiger	GAGA type 2	indirect	GCAGGCAGGCGAGCAAGAGGGACAACGG	eiger (egr) encodes the TNF superfamily ligand that activates the intracellular JNK pathway through its receptor encoded by grnd or wgn. Its roles include cell death, tumor suppression, tumor promotion, growth regulation, host defense, pain sensitization, and nutrient response. cts upstream of with a positive effect on apoptotic process.	positive	all	1.91364	0.00456738
FBgn0033690	EndoG	GAGA type 1	direct	GAGTTATTCGAGCTCGGATATCTTG	Endonuclease G (EndoG) encodes an enzyme with endodeoxyribonuclease and endoribonuclease activity. It is involved in germ cell programmed cell death, mitochondrion inheritance and spermatid development.	positive	all (execution)	0.973272	0.912393
FBgn0033690	EndoG	GAGA type 1	indirect	AAGATATCCGAGCTCGAATAACTCG	Endonuclease G (EndoG) encodes an enzyme with endodeoxyribonuclease and endoribonuclease activity. It is involved in germ cell programmed cell death, mitochondrion inheritance and spermatid development.	positive	all (execution)	0.973272	0.912393
FBgn0000577	engrailed	GAGA type 2	direct	CGCCCCGTGAGAGAGGGAGAGCTTGCGC	engrailed (en) encodes a homeodomain-containing transcription factor that is essential for posterior compartment identity and for compartment boundary formation and maintenance. It positively regulates the hh gene and negatively regulates the Hedgehog targets encoded by ci, ptc and dpp	negative	development	2.59335	1.80287e-08
FBgn0000577	engrailed	GAGA type 2	direct	CCCCGTGAGAGAGGGAGAGCTTGCGCCT	engrailed (en) encodes a homeodomain-containing transcription factor that is essential for posterior compartment identity and for compartment boundary formation and maintenance. It positively regulates the hh gene and negatively regulates the Hedgehog targets encoded by ci, ptc and dpp	negative	development	2.59335	1.80287e-08
FBgn0000320	eya	GAGA type 2	direct	CCAAGCGTGCGAGCGAGAGCGCAGCGCT	eyes absent (eya) encodes a transcriptional cofactor that physically interacts with several other retinal determination proteins, including those encoded by ey, dac, and so. The product of eya regulates eye, gonad, and brain development as well as axon pathfinding.	negative	development	0.892344	0.44382
FBgn0000320	eya	GAGA type 1	indirect	GCCGCTTTTGAGTGAGTTTTCTCAG	eyes absent (eya) encodes a transcriptional cofactor that physically interacts with several other retinal determination proteins, including those encoded by ey, dac, and so. The product of eya regulates eye, gonad, and brain development as well as axon pathfinding.	negative	development	0.892344	0.44382
FBgn0000320	eya	GAGA type 1	indirect	GCGAGTTTTGAGTGAGTTTCCTCTG	eyes absent (eya) encodes a transcriptional cofactor that physically interacts with several other retinal determination proteins, including those encoded by ey, dac, and so. The product of eya regulates eye, gonad, and brain development as well as axon pathfinding.	negative	development	0.892344	0.44382
FBgn0001075	fat	GAGA type 2	indirect	GCTACGCAGAGAGATAGAGTTGGACTCT	fat (ft) is a tumor suppressor gene that encodes a large cadherin family transmembrane protein. It functions in the Hippo signaling pathway (as a receptor) and the Dachsous-Fat planar cell polarity pathway (as a transmembrane component).	positive	all	3.69092	2.63927e-11
FBgn0001075	fat	GAGA type 1	indirect	GACTCTCCGGAGAGAGATACCTGTT	fat (ft) is a tumor suppressor gene that encodes a large cadherin family transmembrane protein. It functions in the Hippo signaling pathway (as a receptor) and the Dachsous-Fat planar cell polarity pathway (as a transmembrane component).	positive	all	3.69092	2.63927e-11
FBgn0266084	Fhos	GAGA type 1	indirect	TCGGCAAGCGAGAGATTCGATCGGA	Formin homology 2 domain containing (Fhos) encodes a protein that regulates actin-dependent remodeling of muscle cytoskeleton via induction of actin stress fibers, directs macrophage migration during cellular immune response, and is involved in autophagic programmed cell death.	positive	all, development	2.09306	0.000134098
FBgn0266084	Fhos	GAGA type 1	direct	TCCGTTCAAGAGAGAATCGGAATGA	Formin homology 2 domain containing (Fhos) encodes a protein that regulates actin-dependent remodeling of muscle cytoskeleton via induction of actin stress fibers, directs macrophage migration during cellular immune response, and is involved in autophagic programmed cell death.	positive	all, development	2.09306	0.000134098
FBgn0028734	Fmr1	GAGA type 1	indirect	GCCTTGCCAGAGTGACTATAAGTTG	Fmr1 (Fmr1) encodes an RNA and channel binding protein. It acts as a neural growth brake regulating RNA trafficking, RNA translation and neuronal excitability. Fmr1 loss causes Fragile X syndrome	positive	development	0.852326	0.343781
FBgn0000659	fork head	GAGA type 2	direct	GGCCATTGGCGAGAACGAGTCGGAGCTG	fork head (fkh) encodes a winged-helix nuclear transcription factor most studied for its role in salivary gland formation, where it is required for salivary gland viability, invagination, and maintaining expression of other early-expressed salivary gland transcription factors. It works with the product of sage to activate expression of salivary gland specific gene products, such as secreted prote…	negative	development	2.81482	0.431859
FBgn0000659	fork head	GAGA type 2	direct	TGGCGAGAACGAGTCGGAGCTGGTGCTG	fork head (fkh) encodes a winged-helix nuclear transcription factor most studied for its role in salivary gland formation, where it is required for salivary gland viability, invagination, and maintaining expression of other early-expressed salivary gland transcription factors. It works with the product of sage to activate expression of salivary gland specific gene products, such as secreted prote…	negative	development	2.81482	0.431859
FBgn0259108	futsch	GAGA type 1	indirect	CGCCAGCCAGAGTGACGACATCGAA	futsch (futsch) encodes a microtubule binding protein involved in the formation of synaptic buttons at the neuromuscular junctions. Its expression levels are regulated by the product of TBPH to prevent synaptic defects	negative	development	0.581373	0.0179473
FBgn0261703	gce	GAGA type 2	direct	CAAGTTGCGTGAGCGCGAGCGAGACGGC	germ cell-expressed bHLH-PAS (gce) encodes a bHLH-PAS domain transcription factor paralogous to the product of Met. It is a receptor for the sesquiterpenoid juvenile hormone.	negative	development	1.73054	0.0168063
FBgn0261703	gce	GAGA type 2	direct	AAAGCTGTCTGAGCGCGAGAGTCCTGGC	germ cell-expressed bHLH-PAS (gce) encodes a bHLH-PAS domain transcription factor paralogous to the product of Met. It is a receptor for the sesquiterpenoid juvenile hormone.	negative	development	1.73054	0.0168063
FBgn0261703	gce	GAGA type 1	direct	CGTGAGCGCGAGCGAGACGGCTGTG	germ cell-expressed bHLH-PAS (gce) encodes a bHLH-PAS domain transcription factor paralogous to the product of Met. It is a receptor for the sesquiterpenoid juvenile hormone.	negative	development	1.73054	0.0168063
FBgn0015946	grim	GAGA type 1	indirect	AGAAGCGGTGAGAGACTCGGGAAAT	grim (grim) encodes a member of the inhibitor of apoptotic protein antagonists. In response to death signals, it induces apoptosis of cells in the central nervous system. It is important particularly for the apoptosis of specific juvenile neurons during metamorphosis	positive	all, development	#N/A	#N/A
FBgn0015946	grim	GAGA type 1	direct	ATTCACTGCGAGAGAGGAACTCGCT	grim (grim) encodes a member of the inhibitor of apoptotic protein antagonists. In response to death signals, it induces apoptosis of cells in the central nervous system. It is important particularly for the apoptosis of specific juvenile neurons during metamorphosis	positive	all, development	#N/A	#N/A
FBgn0025825	HDAC3	GAGA type 1	direct	ACATGCACAGAGAGACTTGTGAATT	Histone deacetylase 3 (HDAC3) encodes a histone deacetylase involved in chromatin silencing. It controls cell growth through apoptosis suppression by regulating transcription of hid.	negative	all	#N/A	#N/A
FBgn0003997	hid	GAGA type 2	indirect	ATAGCTGAGTGAGGAAGAGTATACTCGG	Activator of apoptosis, with grim and rpr, that acts on the effector Dredd	positive	all	0.941146	0.784755
FBgn0003997	hid	GAGA type 2	direct	GCATGTGCAGGAGAGGGAGCGAGAGAGA	Activator of apoptosis, with grim and rpr, that acts on the effector Dredd	positive	all	0.941146	0.784755
FBgn0003997	hid	GAGA type 2	direct	GCAGGAGAGGGAGCGAGAGAGATTGCGA	Activator of apoptosis, with grim and rpr, that acts on the effector Dredd	positive	all	0.941146	0.784755
FBgn0003997	hid	GAGA type 2	indirect	ATAGCTGAGTGAGGAAGAGTATACTCGG	Activator of apoptosis, with grim and rpr, that acts on the effector Dredd	positive	all	0.941146	0.784755
FBgn0003997	hid	GAGA type 1	direct	CATGTGCAGGAGAGGGAGCGAGAGA	Activator of apoptosis, with grim and rpr, that acts on the effector Dredd	positive	all	0.941146	0.784755
FBgn0003997	hid	GAGA type 1	indirect	ATAGCTGAGTGAGGAAGAGTATACTCGG	Activator of apoptosis, with grim and rpr, that acts on the effector Dredd	positive	all	0.941146	0.784755
FBgn0035142	Hipk	GAGA type 2	direct	AAAACCGGCAGAGTCAGAGTGACCAGCT	Homeodomain interacting protein kinase (Hipk) encodes a protein that belongs to the DYRK family kinases. It can modulate signaling pathways including Wingless, Notch, Hippo, Hedgehog, JNK, and cell death. It plays roles in development, proliferation and patterning of many tissues, including the eye, wing, and the embryo	positive	all	0.648219	0.0201069
FBgn0035142	Hipk	GAGA type 1	indirect	GTGAGTCCGGAGCTTGAATGCTCGA	Homeodomain interacting protein kinase (Hipk) encodes a protein that belongs to the DYRK family kinases. It can modulate signaling pathways including Wingless, Notch, Hippo, Hedgehog, JNK, and cell death. It plays roles in development, proliferation and patterning of many tissues, including the eye, wing, and the embryo	positive	all	0.648219	0.0201069
FBgn0032525	Hsp60D	GAGA type 2	indirect	TAGATCAGCCGAGTTTGAGCTACGTGGA	Heat shock protein 60D (Hsp60D) encodes a protein involved in caspase-mediated apoptosis and polyQ-mediated neurodegeneration.	positive	all	0.847923	0.160799
FBgn0261984	Ire1	GAGA type 2	indirect	TCAAAGGACGGAGCAAGAGCTCCCAGGA	Inositol-requiring enzyme-1 (Ire1) encodes a transmembrane protein that mediates the unfolded protein response. Misfolded peptides in the endoplasmic reticulum activate the RNase activity of the product of Ire1, thereby promoting the cleavage of its downstream substrates, such as Xbp1 mRNA. The product of Ire1 is also required for photoreceptor differentiation	negative	all	0.917304	0.6926
FBgn0010051	Itpr	GAGA type 1	direct	AGATCGTTAGAGTGACCATTTCATT	Inositol 1,4,5,-trisphosphate receptor (Itpr) encodes an intracellular ligand gated calcium channel. It functions downstream of G-protein coupled receptors that activate Gq/PLCbeta signaling and generate inositol tris-phosphate. Itpr depletion affects ecdysone release, response to nutritional stress, lipid metabolism and flight.	positive	all, development	1.17937	0.527144
FBgn0013469	klu	GAGA type 2	indirect	AAAGTCGCGAGAGAGCGAGAAAGAGCAG	transcription factor - zinc finger - early growth response family - involved in determination of the identities of secondary precursor cells within neuroblast lineages in the central nervous system - a genetic cascade involving and specifies the abdominal leucokinergic neurons in the Drosophila CNS	positive	development	0.601032	0.0322315
FBgn0013469	klu	GAGA type 2	indirect	GCGAGAGAGCGAGAAAGAGCAGCACGTG	transcription factor - zinc finger - early growth response family - involved in determination of the identities of secondary precursor cells within neuroblast lineages in the central nervous system - a genetic cascade involving and specifies the abdominal leucokinergic neurons in the Drosophila CNS	positive	development	0.601032	0.0322315
FBgn0029800	lin-52	GAGA type 1	direct	GAGGTCGCGGAGAGGTTCGCGTTTC	lin-52 (lin-52) encodes a subunit of the MuvB core complex. The MuvB core binds to the oncoprotein encoded by Myb and the Rbf-E2f2-Dp tumor suppressor complex, thereby controlling the expression of many genes, including critical regulators of the cell cycle. Involved in compound eye development; negative regulation of execution phase of apoptosis;	negative	all (execution)	1.43486	0.0160972
FBgn0001234	lncRNA:Hsrω	GAGA type 1	indirect	TAAAAACAAGAGAGAGTTCTATAAT	Heat shock RNA ω (lncRNA:Hsrω) is a developmentally expressed and stress-inducible long non-coding RNA gene, producing multiple nuclear and cytoplasmic transcripts. The long nuclear transcripts, in association with various heterogeneous nuclear ribonucleoproteins (hnRNPs), organize nucleoplasmic omega speckles to regulate multiple cellular processes. It is involved in the biological process descr…	positive	all	3.3567	1.58172e-13
FBgn0283521	lola	GAGA type 2	indirect	TAGAACAAGTGAGTGCGAGCGAGATGGG	longitudinals lacking (lola) encodes a protein involved in Notch signaling, cell death, regulation of retrotransposons and expression of axon and dendrite patterning genes. It contributes to oogenesis, spermatogenesis, neural wiring, eye development and a variety of behaviors.	positive	development	1.09106	0.584294
FBgn0002723	Met	GAGA type 2	direct	TGCCGTAAACAAGAAAGAGCGCCAATAG	Methoprene-tolerant (Met) encodes bHLH-PAS domain transcription factor paralogous to gce. It is a receptor for the sesquiterpenoid juvenile hormone.	negative	development	0.924216	0.8039
FBgn0039140	Mitochondrial Rho	GAGA type 2	direct	TTGAGCATTCGAGCACTCGAACTCGAAC	Mitochondrial Rho (Miro) encodes an atypical GTPase and Ca[2+] sensor on the outer mitochondrial membrane that is vital for mitochondrial homeostasis and microtubule-based mitochondrial transport. It mediates linkage to kinesin and dynein motors through interactions with Milton/TRAK adaptor proteins	positive	all	0.767658	0.0120951
FBgn0039140	Mitochondrial Rho	GAGA type 2	indirect	GCTCCAGTTCGAGTTCGAGTGCTCGAAT	Mitochondrial Rho (Miro) encodes an atypical GTPase and Ca[2+] sensor on the outer mitochondrial membrane that is vital for mitochondrial homeostasis and microtubule-based mitochondrial transport. It mediates linkage to kinesin and dynein motors through interactions with Milton/TRAK adaptor proteins	positive	all	0.767658	0.0120951
FBgn0039140	Mitochondrial Rho	GAGA type 2	indirect	GTTCGAGTTCGAGTGCTCGAATGCTC	Mitochondrial Rho (Miro) encodes an atypical GTPase and Ca[2+] sensor on the outer mitochondrial membrane that is vital for mitochondrial homeostasis and microtubule-based mitochondrial transport. It mediates linkage to kinesin and dynein motors through interactions with Milton/TRAK adaptor proteins	positive	all	0.767658	0.0120951
FBgn0026252	moleskin	GAGA type 1	indirect	GTTAAAGGCGAGCGAAGATCGCAAC	moleskin (msk) encodes an importin that contributes to protein import into the nucleus. It is involved in eye development, muscle attachment and wing cell fate specification. involved_in negative regulation of neuron apoptotic process	negative	development	0.775072	0.0395707
FBgn0036486	Msh6	GAGA type 1	direct	AACGGGCACGAGTTCCCTAAATATA	Msh6 (Msh6) encodes a heterodimer with the product of spel1 to detect base-base mismatches and small insertion/deletion loops. It then recruits the rest of the mismatch repair machinery.	positive	all	0.643198	0.00507397
FBgn0262656	myc	GAGA type 2	indirect	TTTTTTGAGTGAAAGAGAGTGAGATTTT	Myc (Myc) encodes a transcription factor that is homologous to vertebrate Myc proto-oncogenes. It contributes to cell growth, cell competition and regenerative proliferation.	positive	all	0.635584	0.133503
FBgn0262656	myc	GAGA type 2	indirect	TTGAGTGAAAGAGAGTGAGATTTTTGAG	Myc (Myc) encodes a transcription factor that is homologous to vertebrate Myc proto-oncogenes. It contributes to cell growth, cell competition and regenerative proliferation.	positive	all	0.635584	0.133503
FBgn0262656	myc	GAGA type 1	indirect	AGTGAAAGAGAGTGAGATTTTTGAG	Myc (Myc) encodes a transcription factor that is homologous to vertebrate Myc proto-oncogenes. It contributes to cell growth, cell competition and regenerative proliferation.	positive	all	0.635584	0.133503
FBgn0031043	Naa20A	GAGA type 2	direct	GCCTGCCGTTGAGACTGAGACTGTTCCA	N(alpha)-acetyltransferase 20 A Predicted to enable peptide alpha-N-acetyltransferase activity. Involved in histone acetylation and negative regulation of neuron apoptotic process. Part of NatB complex.	negative	development	1.40635	0.0275725
FBgn0031043	Naa20A	GAGA type 1	direct	GAAGAAGAAGAGCGAGGACAGGACC	N(alpha)-acetyltransferase 20 A Predicted to enable peptide alpha-N-acetyltransferase activity. Involved in histone acetylation and negative regulation of neuron apoptotic process. Part of NatB complex.	negative	development	1.40635	0.0275725
FBgn0002962	nanos	GAGA type 2	direct	GTTGCAAAACGAGCGCTCTTCGCCGGCG	nanos (nos) encodes an RNA-binding protein that forms part of a translational repressor complex. It functions as the localized determinant of abdominal segmentation. It contributes to germline development, germline stem cell renewal, and neuronal morphogenesis and function	negative	development	1.09746	0.70352
FBgn0261530	nbs	GAGA type 1	indirect	ACAAAGAAGGAGTGAGAATAATAGG	nbs (nbs) encodes a component of the conserved MRN complex, which plays an important role in the repair of DNA double strand breaks. The product of nbs is required to prevent chromosome breakage, interacts with the telomere capping complex and prevents telomeric fusions	negative	all	1.03336	0.8039
FBgn0262738	norpA	GAGA type 1	indirect	TTTAAAACAGAGAGACATAAATGCA	The production of the second messenger molecules diacylglycerol (DAG) and inositol 1,4,5-trisphosphate (IP3) is mediated by activated phosphatidylinositol-specific phospholipase C enzymes (By similarity). Essential component of the phototransduction pathway . Essential downstream component of a hh-signaling pathway which regulates the Duox-dependent gut immune response to bacterial uracil; requir…	negative	development	1.09078	0.691528
FBgn0261276	Optic atrophy 1	GAGA type 2	indirect	CTTAACTACATCTTAAGAGCTTTAAGTA	Optic atrophy 1 (Opa1) encodes a dynamin-related GTPase that mediates fusion of the inner membrane of mitochondria. It usually works with the product of Marf to coordinately fuse both mitochondrial membranes. The product of Opa1 activity is regulated by proteolytic processing. involved_in negative regulation of endoplasmic reticulum stress-induced intrinsic apoptotic signaling pathway	negative	all	0.981383	0.919174
FBgn0019952	Orct	GAGA type 1	direct	ATATATGGGGAGCTCATATATAATA	Organic cation transporter, Probably transports organic cations. Predicted to enable transmembrane transporter activity. Predicted to be involved in apoptotic process.	?	?	6.59368	2.19192e-27
FBgn0259834	out	GAGA type 2	direct	GAGACAGGTGGAGAGAGAGGGAAGGCTA	outsiders (out) encodes a monocarboxylate transporter involved in programmed cell death of primordial germ cell/pole cells.	negative	development	1.07619	0.630301
FBgn0259834	out	GAGA type 2	indirect	ACGGCGGAACGAGAGCGAGATGGTCGGA	outsiders (out) encodes a monocarboxylate transporter involved in programmed cell death of primordial germ cell/pole cells.	negative	development	1.07619	0.630301
FBgn0259834	out	GAGA type 1	indirect	CCGTACACTGAGAGAAATTTGCATT	outsiders (out) encodes a monocarboxylate transporter involved in programmed cell death of primordial germ cell/pole cells.	negative	development	1.07619	0.630301
FBgn0003892	patched	GAGA type 2	direct	CACGAAACAAGAGAGCGAGTGAGAGTAG	patched (ptc) is a segment polarity gene that encodes a 12-pass transmembrane protein involved in Hh signalling regulation. ptc product contributes to the binding, internalization and degradation of the ligand encoded by hh, limiting its activity spatial range. ptc product also represses the constitutive signaling activity of the transmembrane protein encoded by smo.	negative	development	1.35678	0.155524
FBgn0003892	patched	GAGA type 2	direct	ACAAGAGAGCGAGTGAGAGTAGGGAGAG	patched (ptc) is a segment polarity gene that encodes a 12-pass transmembrane protein involved in Hh signalling regulation. ptc product contributes to the binding, internalization and degradation of the ligand encoded by hh, limiting its activity spatial range. ptc product also represses the constitutive signaling activity of the transmembrane protein encoded by smo.	negative	development	1.35678	0.155524
FBgn0003892	patched	GAGA type 2	direct	CCCGCTGGGCAAGAGAGAGTGAGAGAGA	patched (ptc) is a segment polarity gene that encodes a 12-pass transmembrane protein involved in Hh signalling regulation. ptc product contributes to the binding, internalization and degradation of the ligand encoded by hh, limiting its activity spatial range. ptc product also represses the constitutive signaling activity of the transmembrane protein encoded by smo.	negative	development	1.35678	0.155524
FBgn0003892	patched	GAGA type 2	direct	CTGGGCAAGAGAGAGTGAGAGAGAGAAA	patched (ptc) is a segment polarity gene that encodes a 12-pass transmembrane protein involved in Hh signalling regulation. ptc product contributes to the binding, internalization and degradation of the ligand encoded by hh, limiting its activity spatial range. ptc product also represses the constitutive signaling activity of the transmembrane protein encoded by smo.	negative	development	1.35678	0.155524
FBgn0003892	patched	GAGA type 2	direct	GGGCAAGAGAGAGTGAGAGAGAGAAACA	patched (ptc) is a segment polarity gene that encodes a 12-pass transmembrane protein involved in Hh signalling regulation. ptc product contributes to the binding, internalization and degradation of the ligand encoded by hh, limiting its activity spatial range. ptc product also represses the constitutive signaling activity of the transmembrane protein encoded by smo.	negative	development	1.35678	0.155524
FBgn0003892	patched	GAGA type 2	direct	AAGAGAGAGTGAGAGAGAGAAACAGCGG	patched (ptc) is a segment polarity gene that encodes a 12-pass transmembrane protein involved in Hh signalling regulation. ptc product contributes to the binding, internalization and degradation of the ligand encoded by hh, limiting its activity spatial range. ptc product also represses the constitutive signaling activity of the transmembrane protein encoded by smo.	negative	development	1.35678	0.155524
FBgn0020386	Pdk1	GAGA type 2	indirect	AACTGGAAGAGAGATAGAGAGTTATGGG	Phosphoinositide-dependent kinase 1 Serine/threonine kinase required for embryonic development. Inhibits apoptosis. Acts in the insulin receptor transduction pathway which regulates cell growth and organ size, by phosphorylating and activating Akt1 and S6k. May be involved in axonal pathfinding and synaptogenesis, and in spermatogenesis.	negative	all	0.583926	2.00398e-06
FBgn0020386	Pdk1	GAGA type 2	indirect	AACTGGAAGAGAGATAGAGAGTTATGGG	Serine/threonine kinase required for embryonic development. Inhibits apoptosis. Acts in the insulin receptor transduction pathway which regulates cell growth and organ size, by phosphorylating and activating Akt1 and S6k. May be involved in axonal pathfinding and synaptogenesis, and in spermatogenesis	negative	all	0.583926	2.00398e-06
FBgn0032749	Phlpp	GAGA type 2	indirect	TCATTGAAAAGAGGGTGAGTTTCAGCAA	PH domain leucine-rich repeat protein phosphatase (Phlpp) encodes an enzyme involved in apoptosis regulation and tumor growth suppression via dephosphorylation of the product of Akt.	positive	all	0.704644	0.0335377
FBgn0032749	Phlpp	GAGA type 2	indirect	TCCGATCAAAGAGCACGAGGGGCTCTCT	PH domain leucine-rich repeat protein phosphatase (Phlpp) encodes an enzyme involved in apoptosis regulation and tumor growth suppression via dephosphorylation of the product of Akt.	positive	all	0.704644	0.0335377
FBgn0029891	Pink1	GAGA type 1	direct	GCCAACAAGGAGAGGATCGACAAGA	PTEN-induced putative kinase 1 (Pink1) is the ortholog of human PINK1, a gene mutated in autosomal recessive Parkinson's disease. Pink1 encodes a mitochondrially targeted Ser-Thr kinase. It has been linked to a number of cellular functions including altering mitochondrial dynamics, the autophagic degradation of dysfunctional mitochondria, and the proper function of Complex I of the electron trans…	negative	all	0.753092	0.0220846
FBgn0013726	pnut	GAGA type 1	direct	AGCAAGTGTGAGAGAGAAGCGAAAG	peanut (pnut) encodes a protein that belongs to the septin family of polymerizing GTPases. Together with the products of Septin1 and Septin2, it forms the septin complex. It participates in cytokinesis and other processes that involve organization of the cell cortex.	positive	all	0.915141	0.638036
FBgn0013726	pnut	GAGA type 1	direct	CAAGTGTGAGAGAGAAGCGAAAGTC	peanut (pnut) encodes a protein that belongs to the septin family of polymerizing GTPases. Together with the products of Septin1 and Septin2, it forms the septin complex. It participates in cytokinesis and other processes that involve organization of the cell cortex.	positive	all	0.915141	0.638036
FBgn0013726	pnut	GAGA type 1	direct	GTTCTCAGCGAGAGAGATAAGCTCA	peanut (pnut) encodes a protein that belongs to the septin family of polymerizing GTPases. Together with the products of Septin1 and Septin2, it forms the septin complex. It participates in cytokinesis and other processes that involve organization of the cell cortex.	positive	all	0.915141	0.638036
FBgn0013726	pnut	GAGA type 1	direct	TCTCAGCGAGAGAGATAAGCTCAGC	peanut (pnut) encodes a protein that belongs to the septin family of polymerizing GTPases. Together with the products of Septin1 and Septin2, it forms the septin complex. It participates in cytokinesis and other processes that involve organization of the cell cortex.	positive	all	0.915141	0.638036
FBgn0013726	pnut	GAGA type 2	indirect	TTGTGACGCTGAGAACTCGACTTTCGCT	peanut (pnut) encodes a protein that belongs to the septin family of polymerizing GTPases. Together with the products of Septin1 and Septin2, it forms the septin complex. It participates in cytokinesis and other processes that involve organization of the cell cortex.	positive	all	0.915141	0.638036
FBgn0003118	pointed	GAGA type 1	direct	AGAGAAAGAGAGAGAGAAACGGAGA	pointed (pnt) encodes an ETS family transcriptional activator that functions downstream of Ras signaling. It is necessary and sufficient for triggering cellular senescence upon Ras activation, and by doing so suppresses Ras-driven tumor growth. involved_in negative regulation of apoptotic signaling pathway	negative	all	2.15694	0.000748938
FBgn0003118	pointed	GAGA type 1	direct	AGAAAGAGAGAGAGAAACGGAGAGA	pointed (pnt) encodes an ETS family transcriptional activator that functions downstream of Ras signaling. It is necessary and sufficient for triggering cellular senescence upon Ras activation, and by doing so suppresses Ras-driven tumor growth. involved_in negative regulation of apoptotic signaling pathway	negative	all	2.15694	0.000748938
FBgn0003118	pointed	GAGA type 2	direct	TAGCAGCGGAGAGAAAGAGAGAGAGAAA	pointed (pnt) encodes an ETS family transcriptional activator that functions downstream of Ras signaling. It is necessary and sufficient for triggering cellular senescence upon Ras activation, and by doing so suppresses Ras-driven tumor growth. involved_in negative regulation of apoptotic signaling pathway	negative	all	2.15694	0.000748938
FBgn0003118	pointed	GAGA type 2	direct	CGGAGAGAAAGAGAGAGAGAAACGGAGA	pointed (pnt) encodes an ETS family transcriptional activator that functions downstream of Ras signaling. It is necessary and sufficient for triggering cellular senescence upon Ras activation, and by doing so suppresses Ras-driven tumor growth. involved_in negative regulation of apoptotic signaling pathway	negative	all	2.15694	0.000748938
FBgn0038519	Prx3	GAGA type 1	direct	GGATTAAGAGAGCGATATATAAAAG	Peroxiredoxin 3 (Prx3) encodes an antioxidant protein involved in hydrogen peroxide catabolism and regulation of apoptosis.	negative	all	1.00362	0.986142
FBgn0243512	puckered	GAGA type 2	direct	CAAAAGGTTTGAGCCCGAGATAAAAGAA	puckered (puc) encodes a serine/threonine protein phosphatase that mediates a feedback loop that regulates the Jun-N-terminal kinase pathway	negative	development	1.10417	0.554475
FBgn0032006	Pvr	GAGA type 1	direct	AAACTAAACGAGAGATAAACTCCCT	PDGF- and VEGF-receptor related (Pvr) encodes a receptor tyrosine kinase activated by the binding of PDGF- and VEGF-related factors (encoded by Pvf1, Pvf2 or Pvf3). It is involved in cell migration regulation and it has been shown to activate the canonical Ras/Raf/MAP kinase (ERK) cascade, the PI3K kinase pathway, TORC1, Rho family small GTPases and the JNK cascade, in a context-dependent manner.	negative	all	0.745071	0.0967893
FBgn0030613	Rab3 GDP-GTP exchange factor	GAGA type 2	indirect	GCCCCTGCTCGAGCGCTAGTGCAATGTG	Rab3 GDP-GTP exchange factor (Rab3-GEF) encodes a guanine nucleotide exchange factor (GEF) for the small GTPase encoded by Rab3. They control synaptic development and function, including the regulation of active zone protein composition at the neuromuscular junction. cell death; regulation of programmed cell death;	positive	development	1.42461	0.227558
FBgn0030613	Rab3 GDP-GTP exchange factor	GAGA type 2	direct	AATATAATCTGAATGAGAGTTCGTGATA	Rab3 GDP-GTP exchange factor (Rab3-GEF) encodes a guanine nucleotide exchange factor (GEF) for the small GTPase encoded by Rab3. They control synaptic development and function, including the regulation of active zone protein composition at the neuromuscular junction. cell death; regulation of programmed cell death;	positive	development	1.42461	0.227558
FBgn0030613	Rab3 GDP-GTP exchange factor	GAGA type 1	direct	TTGTTTTTAGAGAGATTTCTCCGAT	Rab3 GDP-GTP exchange factor (Rab3-GEF) encodes a guanine nucleotide exchange factor (GEF) for the small GTPase encoded by Rab3. They control synaptic development and function, including the regulation of active zone protein composition at the neuromuscular junction. cell death; regulation of programmed cell death;	positive	development	1.42461	0.227558
FBgn0003079	Raf	GAGA type 2	indirect	ATGAACTACTGAGATCGAGATCGAGTTG	Raf oncogene (Raf) encodes a serine-threonine protein kinase that acts downstream of the product of ras. It activates the MEK/ERK pathway to regulate cell proliferation, differentiation and survival downstream of receptor tyrosine kinases such as those encoded by tor, Egfr, and sev	negative	all	0.866366	0.436234
FBgn0003079	Raf	GAGA type 2	indirect	TACTGAGATCGAGATCGAGTTGATGGCA	Raf oncogene (Raf) encodes a serine-threonine protein kinase that acts downstream of the product of ras. It activates the MEK/ERK pathway to regulate cell proliferation, differentiation and survival downstream of receptor tyrosine kinases such as those encoded by tor, Egfr, and sev	negative	all	0.866366	0.436234
FBgn0029840	raptor	GAGA type 2	direct	GGCCGAGGGTGAGGATGAGCTGATTGAG	raptor (raptor) encodes a crucial component of target of rapamycin (TOR) complex 1, which is a conserved regulator of cell growth and metabolism.	negative	all	0.674322	0.141995
FBgn0017579	RpL14	GAGA type 1	direct	AAGGTCAAGGAGCTCTCCGGCTCCG	Ribosomal protein L14 (RpL14) encodes a component of the large subunit of cytoplasmic ribosomes, which translate mRNAs encoded by the nuclear genome. RpL14 is haploinsufficient - heterozygous mutants display the 'Minute' phenotype, characterized by a slower developmental rate and small adult bristles. Involved in negative regulation of neuron apoptotic process.	negative	development	1.80363	0.000106873
FBgn0034763	RYBP	GAGA type 2	indirect	AATCTTTAAAGAGGATGAGACATGAAAT	Ring and YY1 Binding Protein (RYBP) encodes a ubiquitin interacting protein. It interacts with epigenetic regulators of the Polycomb and trithorax groups to control post-translational histone modifications. The product of RYBP is involved in regulation of the innate immune response and cell death/cell survival, and the control of morphogenesis	negative	all	0.917609	0.440463
FBgn0033784	SCCRO3	GAGA type 2	indirect	TGTGAGCGCCGAGTTTGAGCAAAGCTAA	Squamous cell carcinoma-related oncogene 3 (SCCRO3) encodes a protein involved in the regulation of protein neddylation. involved_in positive regulation of apoptotic process	positive	all	0.644693	5.68672e-05
FBgn0004170	scute	GAGA type 1	indirect	GAAACGGGCGAGAGAATCGGAGAGA	scute (sc) is a proneural gene of the achaete-scute complex. It encodes a transcription factor involved in nervous system development, Notch signalling and sex determination	negative	development	#N/A	#N/A
FBgn0004170	scute	GAGA type 1	indirect	AGAGAAAGAGAGAGAGAGAGTGACG	scute (sc) is a proneural gene of the achaete-scute complex. It encodes a transcription factor involved in nervous system development, Notch signalling and sex determination	negative	development	#N/A	#N/A
FBgn0004170	scute	GAGA type 1	indirect	AGAGAGAGAGAGTGACGGCAAGAGC	scute (sc) is a proneural gene of the achaete-scute complex. It encodes a transcription factor involved in nervous system development, Notch signalling and sex determination	negative	development	#N/A	#N/A
FBgn0004170	scute	GAGA type 1	direct	TGGACTGTCGAGTGAGAACAGTTTT	scute (sc) is a proneural gene of the achaete-scute complex. It encodes a transcription factor involved in nervous system development, Notch signalling and sex determination	negative	development	#N/A	#N/A
FBgn0004170	scute	GAGA type 1	indirect	AAGGTATCTGAGTGAGGGCTCTTTT	scute (sc) is a proneural gene of the achaete-scute complex. It encodes a transcription factor involved in nervous system development, Notch signalling and sex determination	negative	development	#N/A	#N/A
FBgn0004170	scute	GAGA type 2	indirect	GAGAATCGGAGAGAAAGAGAGAGAGAGA	scute (sc) is a proneural gene of the achaete-scute complex. It encodes a transcription factor involved in nervous system development, Notch signalling and sex determination	negative	development	#N/A	#N/A
FBgn0004170	scute	GAGA type 2	indirect	CGGAGAGAAAGAGAGAGAGAGAGTGACG	scute (sc) is a proneural gene of the achaete-scute complex. It encodes a transcription factor involved in nervous system development, Notch signalling and sex determination	negative	development	#N/A	#N/A
FBgn0004170	scute	GAGA type 2	indirect	GAGAGAAAGAGAGAGAGAGAGTGACGGC	scute (sc) is a proneural gene of the achaete-scute complex. It encodes a transcription factor involved in nervous system development, Notch signalling and sex determination	negative	development	#N/A	#N/A
FBgn0004170	scute	GAGA type 2	indirect	GAGAAAGAGAGAGAGAGAGTGACGGCAA	scute (sc) is a proneural gene of the achaete-scute complex. It encodes a transcription factor involved in nervous system development, Notch signalling and sex determination	negative	development	#N/A	#N/A
FBgn0004170	scute	GAGA type 2	indirect	GTATCTGAGTGAGGGCTCTTTTTGCTAC	scute (sc) is a proneural gene of the achaete-scute complex. It encodes a transcription factor involved in nervous system development, Notch signalling and sex determination	negative	development	#N/A	#N/A
FBgn0004170	scute	GAGA type 2	direct	TCGAGTACCTGAGACAGAGAAAGAGAGA	scute (sc) is a proneural gene of the achaete-scute complex. It encodes a transcription factor involved in nervous system development, Notch signalling and sex determination	negative	development	#N/A	#N/A
FBgn0004170	scute	GAGA type 2	direct	ACCTGAGACAGAGAAAGAGAGAGAGACT	scute (sc) is a proneural gene of the achaete-scute complex. It encodes a transcription factor involved in nervous system development, Notch signalling and sex determination	negative	development	#N/A	#N/A
FBgn0004170	scute	GAGA type 2	direct	GACAGAGAAAGAGAGAGAGACTACCTGT	scute (sc) is a proneural gene of the achaete-scute complex. It encodes a transcription factor involved in nervous system development, Notch signalling and sex determination	negative	development	#N/A	#N/A
FBgn0041094	scylla	GAGA type 1	indirect	CAAGAGCGCGAGAGAGAGGGATATA	Inhibits cell growth by regulating the Tor pathway upstream of the Tsc1-Tsc2 complex and downstream of Akt1. Acts as cell death activator during head development.	positive	development	1.24195	0.224516
FBgn0041094	scylla	GAGA type 1	indirect	AGAGCGCGAGAGAGAGGGATATAAC	Inhibits cell growth by regulating the Tor pathway upstream of the Tsc1-Tsc2 complex and downstream of Akt1. Acts as cell death activator during head development.	positive	development	1.24195	0.224516
FBgn0041094	scylla	GAGA type 1	indirect	CCCGAATTTGAGAGAAAACCACGAA	Inhibits cell growth by regulating the Tor pathway upstream of the Tsc1-Tsc2 complex and downstream of Akt1. Acts as cell death activator during head development.	positive	development	1.24195	0.224516
FBgn0041094	scylla	GAGA type 1	direct	AGCGCGCATGAGCGAGACGGCGGAC	Inhibits cell growth by regulating the Tor pathway upstream of the Tsc1-Tsc2 complex and downstream of Akt1. Acts as cell death activator during head development.	positive	development	1.24195	0.224516
FBgn0041094	scylla	GAGA type 2	indirect	GCCGGCGAAAGAGCACGAGAGCGCAAGA	Inhibits cell growth by regulating the Tor pathway upstream of the Tsc1-Tsc2 complex and downstream of Akt1. Acts as cell death activator during head development.	positive	development	1.24195	0.224516
FBgn0041094	scylla	GAGA type 2	indirect	AAGAGCGCAAGAGCGCGAGAGAGAGGGA	Inhibits cell growth by regulating the Tor pathway upstream of the Tsc1-Tsc2 complex and downstream of Akt1. Acts as cell death activator during head development.	positive	development	1.24195	0.224516
FBgn0041094	scylla	GAGA type 2	indirect	GCAAGAGCGCGAGAGAGAGGGATATAAC	Inhibits cell growth by regulating the Tor pathway upstream of the Tsc1-Tsc2 complex and downstream of Akt1. Acts as cell death activator during head development.	positive	development	1.24195	0.224516
FBgn0002573	sens	GAGA type 1	indirect	GTACAAATCGAGCTCTCTTTTTTTT	senseless (sens) encodes a transcription factor that stimulates expression of proneural gene expression. It regulates differentiation of the peripheral nervous system and the R8 photoreceptor.	negative	all	1.51539	0.00909059
FBgn0002573	sens	GAGA type 1	direct	AAAAAAAGAGAGCTCGATTTGTACC	senseless (sens) encodes a transcription factor that stimulates expression of proneural gene expression. It regulates differentiation of the peripheral nervous system and the R8 photoreceptor.	negative	all	1.51539	0.00909059
FBgn0002573	sens	GAGA type 2	indirect	GGTACAAATCGAGCTCTCTTTTTTTTAT	senseless (sens) encodes a transcription factor that stimulates expression of proneural gene expression. It regulates differentiation of the peripheral nervous system and the R8 photoreceptor.	negative	all	1.51539	0.00909059
FBgn0002573	sens	GAGA type 2	indirect	TGGTGGTGGCTCTCGAGAGCCCTGCAAT	senseless (sens) encodes a transcription factor that stimulates expression of proneural gene expression. It regulates differentiation of the peripheral nervous system and the R8 photoreceptor.	negative	all	1.51539	0.00909059
FBgn0002573	sens	GAGA type 2	direct	ATTGCAGGGCTCTCGAGAGCCACCACCA	senseless (sens) encodes a transcription factor that stimulates expression of proneural gene expression. It regulates differentiation of the peripheral nervous system and the R8 photoreceptor.	negative	all	1.51539	0.00909059
FBgn0036786	sickle	GAGA type 2	direct	GAGGGCGACAGAGAGAGAGAGAGAAAGA	sickle (skl) encodes a member of the inhibitor of apoptotic protein antagonists. It is partially involved in the apoptosis of some larval neurons during metamorphosis	positive	all	#N/A	#N/A
FBgn0036786	sickle	GAGA type 2	direct	GGGCGACAGAGAGAGAGAGAGAAAGAGA	sickle (skl) encodes a member of the inhibitor of apoptotic protein antagonists. It is partially involved in the apoptosis of some larval neurons during metamorphosis	positive	all	#N/A	#N/A
FBgn0036786	sickle	GAGA type 2	direct	GAGAGAAAGAGAGAAAGAGAGAGGTAGG	sickle (skl) encodes a member of the inhibitor of apoptotic protein antagonists. It is partially involved in the apoptosis of some larval neurons during metamorphosis	positive	all	#N/A	#N/A
FBgn0036786	sickle	GAGA type 2	direct	GAGGGCGACAGAGAGAGAGAGAGAAAGA	sickle (skl) encodes a member of the inhibitor of apoptotic protein antagonists. It is partially involved in the apoptosis of some larval neurons during metamorphosis	positive	all	#N/A	#N/A
FBgn0036786	sickle	GAGA type 2	direct	GGGCGACAGAGAGAGAGAGAGAAAGAGA	sickle (skl) encodes a member of the inhibitor of apoptotic protein antagonists. It is partially involved in the apoptosis of some larval neurons during metamorphosis	positive	all	#N/A	#N/A
FBgn0036786	sickle	GAGA type 2	direct	GCGACAGAGAGAGAGAGAGAAAGAGAGA	sickle (skl) encodes a member of the inhibitor of apoptotic protein antagonists. It is partially involved in the apoptosis of some larval neurons during metamorphosis	positive	all	#N/A	#N/A
FBgn0036786	sickle	GAGA type 2	direct	GAGAGAGAGAGAGAAAGAGAGAAAGAGA	sickle (skl) encodes a member of the inhibitor of apoptotic protein antagonists. It is partially involved in the apoptosis of some larval neurons during metamorphosis	positive	all	#N/A	#N/A
FBgn0036786	sickle	GAGA type 2	direct	GAGAGAAAGAGAGAAAGAGAGAGGTAGG	sickle (skl) encodes a member of the inhibitor of apoptotic protein antagonists. It is partially involved in the apoptosis of some larval neurons during metamorphosis	positive	all	#N/A	#N/A
FBgn0036786	sickle	GAGA type 1	direct	AGGGCGACAGAGAGAGAGAGAGAAA	sickle (skl) encodes a member of the inhibitor of apoptotic protein antagonists. It is partially involved in the apoptosis of some larval neurons during metamorphosis	positive	all	#N/A	#N/A
FBgn0036786	sickle	GAGA type 1	direct	GAGGGCGACAGAGAGAGAGAGAGAAAGA	sickle (skl) encodes a member of the inhibitor of apoptotic protein antagonists. It is partially involved in the apoptosis of some larval neurons during metamorphosis	positive	all	#N/A	#N/A
FBgn0283468	slmb	GAGA type 1	direct	CAGAAAACGGAGAGAGCGATCGAGA	supernumerary limbs (slmb) encodes an essential, conserved F-box protein and a component of the SCF (Skp/Cullin/F-box) E3 ubiquitin-ligase, providing substrate specificity to the SCF. It negatively regulates multiple signaling pathways and cellular processes by promoting the proteasome-mediated degradation or cleavage of its targets, including the products of arm and ci (Wg and Hh signaling), SAK…	negative	all	0.757873	0.0144321
FBgn0005613	Sox15	GAGA type 2	direct	TTCTGAAAGTGAGACCGAGAGATCGCGA	Sox box protein 15 (Sox15) encodes a transcription factor that regulates cell proliferation and cell death in the wing disc	negative	development	0.971713	0.972772
FBgn0005613	Sox15	GAGA type 1	direct	AGTGAGACCGAGAGATCGCGAGAGT	Sox box protein 15 (Sox15) encodes a transcription factor that regulates cell proliferation and cell death in the wing disc	negative	development	0.971713	0.972772
FBgn0035379	spz5	GAGA type 2	indirect	CTCGGGAAAAGAGGCAGAGAAAAGCAGA	spatzle 5 Neurotrophin which may function as a ligand for the Toll-related receptors Toll-6 and Toll-7 . Binds to Toll-7 and Toll-6, and probably acts as their ligands in the promotion of motor axon targeting and neuronal survival in the central nervous system (CNS) . Involved in synaptic targeting of ISNb/d motorneurons and also some SNa motorneurons . May be involved in the normal development o…	negative	development	1.64437	0.00113645
FBgn0035379	spz5	GAGA type 1	indirect	CTCGGGAAAAGAGGCAGAGAAAAGCAGA	spatzle 5 Neurotrophin which may function as a ligand for the Toll-related receptors Toll-6 and Toll-7 . Binds to Toll-7 and Toll-6, and probably acts as their ligands in the promotion of motor axon targeting and neuronal survival in the central nervous system (CNS) . Involved in synaptic targeting of ISNb/d motorneurons and also some SNa motorneurons . May be involved in the normal development o…	negative	development	1.64437	0.00113645
FBgn0033051	Strica	GAGA type 2	direct	ATAAAAGAGAGAGTAAGAGCGAACCATA	Ser/Thr-rich caspase (Strica) encodes a member of initiator caspases. It contributes, redundantly or cooperatively with the product of Dronc, to the apoptosis of selective larval neurons during metamorphosis and nurse cells during oogenesis, and competitive apoptosis of heterozygous mutant cells	positive	development	1.37503	0.293142
FBgn0003656	swiss cheese	GAGA type 1	indirect	AGCCCGCTAGAGTGACCATACAAAG	swiss cheese (sws) encodes a transmembrane protein that hydrolyzes phosphatidylcholine and binds to and inhibits the C3 catalytic subunit of protein kinase A. Its loss leads to neuronal and glial degeneration and apoptotic cell death.	negative	development	0.645031	0.00190395
FBgn0026323	Tak1	GAGA type 1	direct	GGGCGGGTAGAGAGAATTAAATAGA	TGF-β activated kinase 1 (Tak1) encodes a MAP kinase kinase kinase that functions downstream of the products of imd, Fadd and Diap2. It also functions upstream of the IKK complex in the Imd pathway, a pathway regulating the antibacterial response and other less characterized cellular processes. Upon activation the product of imd, the product of Tak1 can also activate the JNK pathway at the level …	positive	all	1.68856	0.00301259
FBgn0051682	Testis EndoG-Like 1	GAGA type 1	indirect	TGATCGGTAGAGTGATGAAAAAGTG	Predicted to enable endoribonuclease activity and single-stranded DNA endodeoxyribonuclease activity. Predicted to be involved in apoptotic DNA fragmentation. Predicted to be active in mitochondrial inner membrane and nucleus.	positive	all (execution)	0.870718	0.392212
FBgn0051679	Testis EndoG-Like 3	GAGA type 2	direct	GTGGGCCGTGGAGTACGAGATGATCGGA	Predicted to enable endoribonuclease activity and single-stranded DNA endodeoxyribonuclease activity. Predicted to be involved in apoptotic DNA fragmentation. Predicted to be active in mitochondrial inner membrane and nucleus. Orthologous to human ENDOG (endonuclease G).	positive	all (execution)	0.890444	0.410473
FBgn0051679	Testis EndoG-Like 3	GAGA type 2	direct	CGACATCCGGGAGATTGAGCACTACGCA	Predicted to enable endoribonuclease activity and single-stranded DNA endodeoxyribonuclease activity. Predicted to be involved in apoptotic DNA fragmentation. Predicted to be active in mitochondrial inner membrane and nucleus. Orthologous to human ENDOG (endonuclease G).	positive	all (execution)	0.890444	0.410473
FBgn0051679	Testis EndoG-Like 3	GAGA type 2	direct	TCGATGGTTTGAGAAGGAGTGCCCTATT	Predicted to enable endoribonuclease activity and single-stranded DNA endodeoxyribonuclease activity. Predicted to be involved in apoptotic DNA fragmentation. Predicted to be active in mitochondrial inner membrane and nucleus. Orthologous to human ENDOG (endonuclease G).	positive	all (execution)	0.890444	0.410473
FBgn0004436	Ubc6	GAGA type 1	indirect	TTTACAATTGAGCGACATGGCAAAA	Ubiquitin conjugating enzyme 6 (Ubc6) encodes an enzyme that acts together with E3 ubiquitin ligases to transfer ubiquitin to target proteins. involved_in negative regulation of intrinsic apoptotic signaling pathway in response to DNA damage by p53 class mediator	negative	all	1.05066	0.722041
FBgn0003965	v	GAGA type 2	indirect	ACCGATAACAGAGCGAGAGAGCTCCAGT	Heme-dependent dioxygenase that catalyzes the oxidative cleavage of the L-tryptophan (L-Trp) pyrrole ring and converts L-tryptophan to N-formyl-L-kynurenine. Catalyzes the oxidative cleavage of the indole moiety (PubMed:23333332). Required during larval growth to control the level of potentially harmful free tryptophan in the hemolymph. In the adult the same reaction is the first step in the ommo…	positive	development	0.763883	0.561513
FBgn0011739	warts	GAGA type 2	indirect	ACATTGTTTTGAGTAAGAATGAAAATAT	warts (wts) encodes a tumor suppressor kinase in the Hippo pathway involved in the control of tissue growth. It also plays a post-mitotic role in R8 photoreceptor cells where it antagonizes the product of melt to control the bistable choice of Rhodospin expression	positive	all	0.693348	0.0129969
FBgn0016078	wun	GAGA type 2	direct	AATATTACCAGAGAGAGAGAGAGGGTCT	wunen (wun) encodes a lipid phosphate phosphatase with 6 transmembrane domains and an active site that is predicted to face extracellularly. It is required for germ cell migration and survival, septate junction function in the tracheal system and for heart formation	negative	development	1.30504	0.044903
FBgn0016078	wun	GAGA type 2	direct	TATTACCAGAGAGAGAGAGAGGGTCTCT	wunen (wun) encodes a lipid phosphate phosphatase with 6 transmembrane domains and an active site that is predicted to face extracellularly. It is required for germ cell migration and survival, septate junction function in the tracheal system and for heart formation	negative	development	1.30504	0.044903
FBgn0016078	wun	GAGA type 2	direct	TTACCAGAGAGAGAGAGAGGGTCTCTCT	wunen (wun) encodes a lipid phosphate phosphatase with 6 transmembrane domains and an active site that is predicted to face extracellularly. It is required for germ cell migration and survival, septate junction function in the tracheal system and for heart formation	negative	development	1.30504	0.044903
FBgn0041087	wun2	GAGA type 2	indirect	ACTCTCCAGCGAGCTCTCTCATGGATAA	wunen-2 (wun2) encodes a lipid phosphate phosphatase, an enzyme with an active site predicted to face extracellularly. It is required for germ cell migration and survival, acting partially redundantly with its paralog wun	negative	development	1.18495	0.374312
FBgn0041087	wun2	GAGA type 2	direct	TGCGAAGTTTGAGATGGAGTGGGTGTAA	wunen-2 (wun2) encodes a lipid phosphate phosphatase, an enzyme with an active site predicted to face extracellularly. It is required for germ cell migration and survival, acting partially redundantly with its paralog wun	negative	development	1.18495	0.374312
FBgn0041087	wun2	GAGA type 2	direct	ATTTATCCATGAGAGAGCTCGCTGGAGA	wunen-2 (wun2) encodes a lipid phosphate phosphatase, an enzyme with an active site predicted to face extracellularly. It is required for germ cell migration and survival, acting partially redundantly with its paralog wun	negative	development	1.18495	0.374312
		miRNA
		stress -related
		DNA breaks

## Sheet: autophagy_GAF_-500
Fbgn	gene name	GAGA type	direction	sequense	description	process regulation	time of action	DEG FC	Padj
FBgn0023169	AMPKα	GAGA type 2	direct	ACTGGAAGGCGAGAGAGAGAGAGAAAGA	AMP-activated protein kinase α subunit (AMPKα) encodes the α subunit of the AMP-activated protein kinase (AMPK) complex. In general AMPK helps cells conserve energy through inhibition of energy consuming processes (fatty acid synthesis, protein synthesis). AMPK is usually active when the TOR pathway is inhibited	positive	all	0.826542	0.111902
FBgn0023169	AMPKα	GAGA type 2	direct	TGGAAGGCGAGAGAGAGAGAGAAAGAGA	AMP-activated protein kinase α subunit (AMPKα) encodes the α subunit of the AMP-activated protein kinase (AMPK) complex. In general AMPK helps cells conserve energy through inhibition of energy consuming processes (fatty acid synthesis, protein synthesis). AMPK is usually active when the TOR pathway is inhibited	positive	all	0.826542	0.111902
FBgn0023169	AMPKα	GAGA type 2	direct	GAAGGCGAGAGAGAGAGAGAAAGAGAGG	AMP-activated protein kinase α subunit (AMPKα) encodes the α subunit of the AMP-activated protein kinase (AMPK) complex. In general AMPK helps cells conserve energy through inhibition of energy consuming processes (fatty acid synthesis, protein synthesis). AMPK is usually active when the TOR pathway is inhibited	positive	all	0.826542	0.111902
FBgn0023169	AMPKα	GAGA type 2	direct	GAGAGAGAGAGAGAAAGAGAGGGCGCGA	AMP-activated protein kinase α subunit (AMPKα) encodes the α subunit of the AMP-activated protein kinase (AMPK) complex. In general AMPK helps cells conserve energy through inhibition of energy consuming processes (fatty acid synthesis, protein synthesis). AMPK is usually active when the TOR pathway is inhibited	positive	all	0.826542	0.111902
FBgn0023169	AMPKα	GAGA type 1	direct	CTGGAAGGCGAGAGAGAGAGAGAAA	AMP-activated protein kinase α subunit (AMPKα) encodes the α subunit of the AMP-activated protein kinase (AMPK) complex. In general AMPK helps cells conserve energy through inhibition of energy consuming processes (fatty acid synthesis, protein synthesis). AMPK is usually active when the TOR pathway is inhibited	positive	all	0.826542	0.111902
FBgn0023169	AMPKα	GAGA type 1	direct	GGAAGGCGAGAGAGAGAGAGAAAGA	AMP-activated protein kinase α subunit (AMPKα) encodes the α subunit of the AMP-activated protein kinase (AMPK) complex. In general AMPK helps cells conserve energy through inhibition of energy consuming processes (fatty acid synthesis, protein synthesis). AMPK is usually active when the TOR pathway is inhibited	positive	all	0.826542	0.111902
FBgn0023169	AMPKα	GAGA type 1	direct	AAGGCGAGAGAGAGAGAGAAAGAGA	AMP-activated protein kinase α subunit (AMPKα) encodes the α subunit of the AMP-activated protein kinase (AMPK) complex. In general AMPK helps cells conserve energy through inhibition of energy consuming processes (fatty acid synthesis, protein synthesis). AMPK is usually active when the TOR pathway is inhibited	positive	all	0.826542	0.111902
FBgn0023169	AMPKα	GAGA type 1	direct	GGCGAGAGAGAGAGAGAAAGAGAGG	AMP-activated protein kinase α subunit (AMPKα) encodes the α subunit of the AMP-activated protein kinase (AMPK) complex. In general AMPK helps cells conserve energy through inhibition of energy consuming processes (fatty acid synthesis, protein synthesis). AMPK is usually active when the TOR pathway is inhibited	positive	all	0.826542	0.111902
FBgn0010380	AP-1-2β	GAGA type 1	indirect	CTCGTAAAAGAGCTCAGATTAGGAA	Adaptor Protein complex 1/2, β subunit (AP-1-2β) encodes a clathrin adaptor involved in vesicle trafficking and autophagy regulation.	positive	all	1.03284	0.839573
FBgn0010380	AP-1-2β	GAGA type 1	indirect	CTCGTAAAAGAGCGAATTAGAGTGAGATGGCTATAAGCTCAGATTAGGAA	Adaptor Protein complex 1/2, β subunit (AP-1-2β) encodes a clathrin adaptor involved in vesicle trafficking and autophagy regulation.	positive	all	1.03284	0.839573
FBgn0010380	AP-1-2β	GAGA type 1	direct	TCCTAATCTGAGCTCTTTTACGAGT	Adaptor Protein complex 1/2, β subunit (AP-1-2β) encodes a clathrin adaptor involved in vesicle trafficking and autophagy regulation.	positive	all	1.03284	0.839573
FBgn0264855	AP-2α	GAGA type 1	indirect	ATGGACGAAGAGAGACGACAATTCG	Adaptor Protein complex 2, α subunit (AP-2α) encodes a subunit of the AP-2 adaptor complex. It is required for proper intracellular trafficking and secretion. It contributes to asymmetric cell division, Notch signalling, apico-basal polarity and neurogenesis.	positive	all	0.851971	0.355422
FBgn0036255	Atg12	GAGA type 2	indirect	CATCCTGCGCAAGAAAGAGCTACTACAG	Required for autophagy	positive	all	0.846004	0.338371
FBgn0035850	Atg18a	GAGA type 2	indirect	ACCGAATCGTGAGCACGAGCCAGCATAG	Autophagy-related 18a (Atg18a) encodes a protein that regulates autophagy by participating in isolation membrane elongation around cytoplasmic cargoes	positive	all	1.24612	0.095723
FBgn0264325	atg6	GAGA type 2	direct	CCAACCCCTTGAGTTCTCTCTTATCAGC	Autophagy-related 6 (Atg6) encodes a component of the Vps34 complex that is required for the formation of PI3P, and functions in vesicle trafficking including autophagy and endocytosis.	positive	all	1.01526	0.923954
FBgn0264325	atg6	GAGA type 1	indirect	AGTAAAAAAGAGAGAAATAACAGAA	Autophagy-related 6 (Atg6) encodes a component of the Vps34 complex that is required for the formation of PI3P, and functions in vesicle trafficking including autophagy and endocytosis.	positive	all	1.01526	0.923954
FBgn0283451	Brc	GAGA type 2	indirect	GTCGCAGGCTGAGGCTGAGACTGAGGCT	Broad-complex proteins are required for puffing and transcription of salivary gland late genes during metamorphosis.	positive	development	1.26293	0.198012
FBgn0283451	Brc	GAGA type 2	indirect	GGCTGAGGCTGAGACTGAGGCTGAGGCT	Broad-complex proteins are required for puffing and transcription of salivary gland late genes during metamorphosis.	positive	development	1.26293	0.198012
FBgn0040491	Buffy	GAGA type 1	indirect	AAGAAGTAGGAGTGAGGTTAACAAC	Buffy (Buffy) encodes one of the two Bcl-2 family members in Drosophila (the other being the product of Debcl). Its loss has been linked to altered energy metabolism in larvae.Predicted to enable protein heterodimerization activity and protein homodimerization activity. Involved in several processes, including ectopic germ cell programmed cell death; positive regulation of macroautophagy? responc…	negative	all	2.77638	1.90696e-08
FBgn0000257	car	GAGA type 1	direct	CCGGCAATTGAGCTCTTTTTGAGTG	carnation (car) encodes a subunit of the conserved HOPS complex, which is required for pigment granule formation and membrane fusion events, such as fusions between endosomes or autophagosomes with lysosomes. car loss of function mutant flies exhibit altered eye color.	positive	all	1.04385	0.831719
FBgn0039749	CG11498	GAGA type 2	indirect	AGCGCTGCCAGAGAGAGAGAAAGACAGT	Predicted to be involved in mitochondrial protein catabolic process and mitophagy by induced vacuole formation. Predicted to be active in mitochondrial outer membrane. Is expressed in spermatozoon.	positive	development	0.750695	0.593701
FBgn0039749	CG11498	GAGA type 1	indirect	GCGCTGCCAGAGAGAGAGAAAGACA	Predicted to be involved in mitochondrial protein catabolic process and mitophagy by induced vacuole formation. Predicted to be active in mitochondrial outer membrane. Is expressed in spermatozoon.	positive	development	0.750695	0.593701
FBgn0039749	CG11498	GAGA type 1	indirect	GCTGCCAGAGAGAGAGAAAGACAGT	Predicted to be involved in mitochondrial protein catabolic process and mitophagy by induced vacuole formation. Predicted to be active in mitochondrial outer membrane. Is expressed in spermatozoon.	positive	development	0.750695	0.593701
FBgn0039749	CG11498	GAGA type 1	indirect	CCACCAGAAGAGCTCTATTGGTTTC	Predicted to be involved in mitochondrial protein catabolic process and mitophagy by induced vacuole formation. Predicted to be active in mitochondrial outer membrane. Is expressed in spermatozoon.	positive	development	0.750695	0.593701
FBgn0031729	CG12511	GAGA type 2	direct	CGCAGCTGGGGAGTGTGAGAAGCGCATA	Predicted to be involved in autophagy of mitochondrion. Predicted to be integral component of mitochondrial outer membrane. Orthologous to human FUNDC1 (FUN14 domain containing 1) and FUNDC2 (FUN14 domain containing 2).	positive	all	0.427295	6.9158e-12
FBgn0031869	CG18304	GAGA type 1	indirect	AATCGATGAGAGCGATTCGAAAATT	Predicted to be involved in regulation of autophagy. Predicted to be located in extracellular space. Is expressed in adult head and spermatozoon. Orthologous to several human genes including SOGA3 (SOGA family member 3).	positive	all	1.72022	0.00212092
FBgn0052087	CG32087	GAGA type 2	direct	ATATCAGGCCGAGGATGAGCATTTGGAG	Predicted to be involved in Golgi organization; autophagy; and cell-cell adhesion. Predicted to be active in endoplasmic reticulum and membrane. Is expressed in adult head. Orthologous to human VMP1 (vacuole membrane protein 1).	positive	all	0.836288	0.0907316
FBgn0052087	CG32087	GAGA type 1	indirect	TACTGATCTGAGTGATAAAATTCTC	Predicted to be involved in Golgi organization; autophagy; and cell-cell adhesion. Predicted to be active in endoplasmic reticulum and membrane. Is expressed in adult head. Orthologous to human VMP1 (vacuole membrane protein 1).	positive	development	0.836288	0.0907316
FBgn0025624	CG4025	GAGA type 2	direct	GTAGTACTTTGAGCTTGAGAAGTAATCA	Predicted to be involved in regulation of autophagy. Predicted to be located in lysosome. Human ortholog(s) of this gene implicated in cone-rod dystrophy. Orthologous to several human genes including DRAM2 (DNA damage regulated autophagy modulator 2).	positive	all	1.77165	0.000396655
FBgn0025624	CG4025	GAGA type 1	direct	CCCGCGGACGAGATCTTTATTTTCT	Predicted to be involved in regulation of autophagy. Predicted to be located in lysosome. Human ortholog(s) of this gene implicated in cone-rod dystrophy. Orthologous to several human genes including DRAM2 (DNA damage regulated autophagy modulator 2)	positive	all	1.77165	0.000396655
FBgn0030838	CG5445	GAGA type 2	indirect	GATGGCAATGGAGGATGAGTTCATGGGC	Predicted to enable ubiquitin binding activity. Predicted to be involved in macroautophagy. Predicted to be active in phagophore assembly site. Is expressed in organism. Orthologous to human ILRUN (inflammation and lipid regulator with UBA-like and NBR1-like domains)	positive	all	0.803175	0.0793823
FBgn0030838	CG5445	GAGA type 1	direct	GGCGGCGTAGAGATCCTTAAGCTCG	Predicted to enable ubiquitin binding activity. Predicted to be involved in macroautophagy. Predicted to be active in phagophore assembly site. Is expressed in organism. Orthologous to human ILRUN (inflammation and lipid regulator with UBA-like and NBR1-like domains).	positive	all	0.803175	0.0793823
FBgn0000247	claret	GAGA type 1	direct	AGGTCCCTTGAGAGGGGCGGCAATA	claret (ca) encodes a protein that is required for wild-type eye color. ca mutant flies show a wine-red eye color	positive	all	0.592988	0.000430789
FBgn0000346	comt	GAGA type 2	indirect	TAGAGTGCTCGAGAGCTCTTTAATATAA	comatose (comt) encodes the N-ethylmaleimide-Sensitive Factor 1 protein. It is required for maintenance of neurotransmitter release through disassembly or rearrangement of plasma membrane SNARE complexes following synaptic vesicle fusion	positive	development	0.913943	0.593924
FBgn0000346	comt	GAGA type 2	direct	AAGAGCTCTCGAGCACTCTACCAATTTA	comatose (comt) encodes the N-ethylmaleimide-Sensitive Factor 1 protein. It is required for maintenance of neurotransmitter release through disassembly or rearrangement of plasma membrane SNARE complexes following synaptic vesicle fusion	positive	development	0.913943	0.593924
FBgn0000346	comt	GAGA type 1	indirect	AGTGCTCGAGAGCTCTTTAATATAA	comatose (comt) encodes the N-ethylmaleimide-Sensitive Factor 1 protein. It is required for maintenance of neurotransmitter release through disassembly or rearrangement of plasma membrane SNARE complexes following synaptic vesicle fusion.	positive	development	0.913943	0.593924
FBgn0031461	daw	GAGA type 2	indirect	AAGTGCGACAGAGAGAGAGAGAGGGAGA	dawdle (daw) encodes an Activin- like ligand of the TGF beta superfamily that is required for proper tricarboxylic acid cycle function in the fat body and also regulates insulin release from IPC neurons.	positive	development	3.25638	0.00206329
FBgn0031461	daw	GAGA type 2	indirect	GTGCGACAGAGAGAGAGAGAGGGAGAGC	dawdle (daw) encodes an Activin- like ligand of the TGF beta superfamily that is required for proper tricarboxylic acid cycle function in the fat body and also regulates insulin release from IPC neurons.	positive	development	3.25638	0.00206329
FBgn0031461	daw	GAGA type 2	indirect	GCGACAGAGAGAGAGAGAGGGAGAGCAG	dawdle (daw) encodes an Activin- like ligand of the TGF beta superfamily that is required for proper tricarboxylic acid cycle function in the fat body and also regulates insulin release from IPC neurons.	positive	development	3.25638	0.00206329
FBgn0031461	daw	GAGA type 2	indirect	CAGAGAGAGAGAGAGGGAGAGCAGGGAG	dawdle (daw) encodes an Activin- like ligand of the TGF beta superfamily that is required for proper tricarboxylic acid cycle function in the fat body and also regulates insulin release from IPC neurons.	positive	development	3.25638	0.00206329
FBgn0031461	daw	GAGA type 2	indirect	GAGAGAGAGAGAGGGAGAGCAGGGAGAG	dawdle (daw) encodes an Activin- like ligand of the TGF beta superfamily that is required for proper tricarboxylic acid cycle function in the fat body and also regulates insulin release from IPC neurons.	positive	development	3.25638	0.00206329
FBgn0031461	daw	GAGA type 2	indirect	GGCCGTTCGTGAGTTCGAGCTTGTTGGG	dawdle (daw) encodes an Activin- like ligand of the TGF beta superfamily that is required for proper tricarboxylic acid cycle function in the fat body and also regulates insulin release from IPC neurons.	positive	development	3.25638	0.00206329
FBgn0031461	daw	GAGA type 1	indirect	TGCGACAGAGAGAGAGAGAGGGAGA	dawdle (daw) encodes an Activin- like ligand of the TGF beta superfamily that is required for proper tricarboxylic acid cycle function in the fat body and also regulates insulin release from IPC neurons.	negative	all	3.25638	0.00206329
FBgn0086687	Desat1	GAGA type 1	indirect	CCTTTCTGTGAGTGATTAAATTAAA	Desaturase 1 (Desat1) encodes a transmembrane fatty acid desaturase that utilizes myristate and stearate ( C16:0 and C18:0 ) to synthesize myristoleic and oleic acids ( C16:1 and C18:1 ). It is involved in the synthesis of unsaturated fatty acids.	positive	all	1.10117	0.512363
FBgn0000482	dor	GAGA type 2	direct	TATATAAATCGAGTCAGAGAGGTGTAAA	Plays a role in vesicle-mediated protein trafficking to lysosomal compartments and in membrane docking/fusion reactions of late endosomes/lysosomes probably as part of the class C core vacuole/endosome tethering (CORVET) complex	positive	all	1.26691	0.268729
FBgn0035542	DOR	GAGA type 1	indirect	ACTGAAAAGGAGAGAGAACAAAAGG	Diabetes and obesity regulated (DOR) encodes a transcriptional coactivator of ecdysone receptor signaling required during metamorphosis. It is antagonized by insulin signaling via the product of foxo in the fat body and forms part of a feed-forward mechanism whereby ecdysone potentiates its own signaling. The product of DOR also regulates autophagosome formation and protein degradation via ecdyso…	positive	all	1.2072	0.10605
FBgn0000546	Ecdysone receptor	GAGA type 2	direct	AAACTGCGTTGAGAGCGAGCCAAAGCGT	Ecdysone receptor (EcR) encodes a protein that interacts with the product of usp to form the nuclear ecdysone receptor heterodimer, which modulates, in conjunction with co-activators and co-repressors, the activities of hundreds of genes in a tissue- and stage-specific way. EcR is widely expressed in embryonic and larval tissues and in some adult tissues where its activities (modulated by the hor…	positive	all, development	0.962577	0.922007
FBgn0038427	ema	GAGA type 1	direct	GGTTCTTTTGAGAGGTTTTTAAAAG	endosomal maturation defective (ema) encodes a protein involved in membrane trafficking that is required for endosomal maturation and autophagy	positive	all	0.675732	0.00049946
FBgn0038197	foxo	GAGA type 1	direct	TCCCTTAAAGAGAGAAATTTGTATG	ranscription factor involved in the regulation of the insulin signaling pathway. Consistently activates both the downstream target Thor\d4EBP and the feedback control target InR. Involved in negative regulation of the cell cycle, modulating cell growth and proliferation. In response to cellular stresses, such as nutrient deprivation or increased levels of reactive oxygen species, foxo is activate…	positive	all	1.99123	0.000840069
FBgn0005198	gig	GAGA type 1	indirect	AGTCCGCGCGAGCTCAAAAAAAAAA	gigas (gig) encodes a tumour suppressor protein that, together with with the product of Tsc1, controls cellular growth via antagonizing insulin and TOR signalling pathways.	positive	all	0.737126	0.118474
FBgn0266064	GlyS	GAGA type 2	indirect	TTGTATTGGCGAGTGGGAGTTTGCGCAG	Glycogen synthase (GlyS) encodes a glycosyltransferase that catalyzes linkage of glucose monomers into glycogen. Regulation of the product of GlyS activity by glucose 6-phosphate and phosphorylation helps control cellular glycogen levels.	positive	all	1.6262	0.077558
FBgn0010303	hep	GAGA type 1	indirect	GGTCGATTCGAGAGACTTCGTTGTT	hemipterous (hep) encodes a serine/threonine protein kinase involved in the Jun-N-terminal kinase pathway by phosphorylating the product of bsk.	positive	all	0.964282	0.888978
FBgn0003997	hid	GAGA type 1	direct	CATGTGCAGGAGAGGGAGCGAGAGA	Activator of apoptosis, with grim and rpr, that acts on the effector Dredd	positive	all	0.941146	0.784755
FBgn0003997	hid	GAGA type 1	direct	AGAGGGAGCGAGAGAGATTGCGATT	Activator of apoptosis, with grim and rpr, that acts on the effector Dredd	positive	all	0.941146	0.784755
FBgn0003997	hid	GAGA type 1	direct	AGGGAGCGAGAGAGATTGCGATTGC	Activator of apoptosis, with grim and rpr, that acts on the effector Dredd	positive	all	0.941146	0.784755
FBgn0003997	hid	GAGA type 2	indirect	ATAGCTGAGTGAGGAAGAGTATACTCGG	Activator of apoptosis, with grim and rpr, that acts on the effector Dredd	positive	all	0.941146	0.784755
FBgn0003997	hid	GAGA type 2	direct	GCATGTGCAGGAGAGGGAGCGAGAGAGA	Activator of apoptosis, with grim and rpr, that acts on the effector Dredd	positive	all	0.941146	0.784755
FBgn0003997	hid	GAGA type 2	direct	GCAGGAGAGGGAGCGAGAGAGATTGCGA	Activator of apoptosis, with grim and rpr, that acts on the effector Dredd	positive	all	0.941146	0.784755
FBgn0030600	highwire	GAGA type 1	indirect	GCTTCCTGCGAGAGAGGACGCTCAG	Atypical E3 ubiquitin-protein ligase which specifically mediates ubiquitination of threonine and serine residues on target proteins, instead of ubiquitinating lysine residues (By similarity). Shows esterification activity towards both threonine and serine, with a preference for threonine, and acts via two essential catalytic cysteine residues that relay ubiquitin to its substrate via thioester in…	positive	development	0.431579	3.57692e-06
FBgn0266599	Hsc70-4	GAGA type 1	indirect	GTACATTTT	Heat shock protein cognate 4 (Hsc70-4) encodes a protein involved in protein folding. It contributes to clathrin-mediated endocytosis, neurotransmitter exocytosis and RNAi response	positive	all	0.878958	0.314605
FBgn0283499	InR	GAGA type 1	indirect	CCTATAGCAGAGCTCTTCGTTTACC	Insulin-like receptor Has a ligand-stimulated tyrosine-protein kinase activity. Required for cell survival. Regulates body size and organ size by altering cell number and cell size in a cell-autonomous manner. Involved in the development of the embryonic nervous system, and is necessary for axon guidance and targeting in the visual system. Also plays a role in life-span determination.	negative	all	0.719749	0.147044
FBgn0032230	lowfat	GAGA type 1	indirect	ATATAAACGGAGTGAATATACTTAA	lowfat (lft) encodes a protein that influences Dachsous-Fat signaling by elevating levels of the products of ds and ft at apical membranes. Mutation of lft causes mild planar cell polarity and growth phenotypes	positive	all	2.24578	0.00679618
FBgn0043884	mask	GAGA type 1	indirect	GTTATATATGAGAGAGTTCATAATA	Mediator of receptor tyrosine kinase (RTK) signaling, and may act either downstream of MAPK or transduce signaling through a parallel branch of the RTK pathway (PubMed:11782402). Required for the development and organization of indirect flight muscle sarcomeres by regulating the formation of M line and H zone and the correct assembly of thick and thin filaments in the sarcomere	negative	all	0.520413	4.56513e-05
FBgn0043884	mask	GAGA type 1	direct	ATATAACAAGAGAGAAGTTAGTAAA	Mediator of receptor tyrosine kinase (RTK) signaling, and may act either downstream of MAPK or transduce signaling through a parallel branch of the RTK pathway (PubMed:11782402). Required for the development and organization of indirect flight muscle sarcomeres by regulating the formation of M line and H zone and the correct assembly of thick and thin filaments in the sarcomere	negative	all	0.520413	4.56513e-05
FBgn0262656	myc	GAGA type 2	indirect	TTTTTTGAGTGAAAGAGAGTGAGATTTT	Myc (Myc) encodes a transcription factor that is homologous to vertebrate Myc proto-oncogenes. It contributes to cell growth, cell competition and regenerative proliferation.	positive	all	0.635584	0.133503
FBgn0262656	myc	GAGA type 1	indirect	AGTGAAAGAGAGTGAGATTTTTGAG	Myc (Myc) encodes a transcription factor that is homologous to vertebrate Myc proto-oncogenes. It contributes to cell growth, cell competition and regenerative proliferation.	positive	all	0.635584	0.133503
FBgn0030800	Nprl2	GAGA type 1	direct	ATGACCGCAGAGCGAGCGCTAAAAT	Nitrogen permease regulator-like 2 (Nprl2) encodes a component of the highly conserved GAP activity towards rags 1 (GATOR1) complex, which inhibits the product of Tor activity in response to amino acid starvation. The product of Nprl2, as well as the other GATOR1 components encoded by Nprl3 and Iml1, regulates early meiotic progression.	positive	all	1.20483	0.390067
FBgn0036397	Nprl3	GAGA type 1	indirect	TCCCTGGTCGAGCGATAACGATCTA	Nitrogen permease regulator-like 3 (Nprl3) encodes a component of the highly conserved GAP activity towards rags 1 (GATOR1) complex, which inhibits the product of Tor activity in response to amino acid starvation. The product of Nprl3, as well as the other GATOR1 components encoded by Nprl2 and Iml1, regulates early meiotic progression.	negative	all	0.960897	0.803347
FBgn0035461	ntc	GAGA type 2	direct	ATCTAGAAACTAGCTAGAGATTTCAATT	nutcracker Functions together with PI31 to control non-apoptotic caspase activation during sperm individualization. Positively regulates PI31 stability.	negative	development	0.926506	0.620241
FBgn0035461	ntc	GAGA type 1	indirect	GCAGATGAGGAGAGAGTCGCTTGTT	nutcracker Functions together with PI31 to control non-apoptotic caspase activation during sperm individualization. Positively regulates PI31 stability.	positive	development	0.926506	0.620241
FBgn0033247	Nup44A	GAGA type 2	indirect	CGCCGCCCATGAGACAGAGATACATGGA	Nucleoporin at 44A (Nup44A) encodes a nuclear pore protein involved in TORC1 signaling, autophagy and oogenesis	negative	all	0.909638	0.486086
FBgn0029891	Pink1	GAGA type 1	direct	GCCAACAAGGAGAGGATCGACAAGA	PTEN-induced putative kinase 1 (Pink1) is the ortholog of human PINK1, a gene mutated in autosomal recessive Parkinson's disease. Pink1 encodes a mitochondrially targeted Ser-Thr kinase. It has been linked to a number of cellular functions including altering mitochondrial dynamics, the autophagic degradation of dysfunctional mitochondria, and the proper function of Complex I of the electron trans…	positive	all	0.753092	0.0220846
FBgn0003079	Raf	GAGA type 2	indirect	ATGAACTACTGAGATCGAGATCGAGTTG	Raf oncogene (Raf) encodes a serine-threonine protein kinase that acts downstream of the product of ras. It activates the MEK/ERK pathway to regulate cell proliferation, differentiation and survival downstream of receptor tyrosine kinases such as those encoded by tor, Egfr, and sev	negative	all	0.866366	0.436234
FBgn0003079	Raf	GAGA type 2	indirect	TACTGAGATCGAGATCGAGTTGATGGCA	Raf oncogene (Raf) encodes a serine-threonine protein kinase that acts downstream of the product of ras. It activates the MEK/ERK pathway to regulate cell proliferation, differentiation and survival downstream of receptor tyrosine kinases such as those encoded by tor, Egfr, and sev	negative	all	0.866366	0.436234
FBgn0029840	raptor	GAGA type 2	direct	GGCCGAGGGTGAGGATGAGCTGATTGAG	raptor (raptor) encodes a crucial component of target of rapamycin (TOR) complex 1, which is a conserved regulator of cell growth and metabolism.	negative	all	0.674322	0.141995
FBgn0041191	Rheb	GAGA type 2	indirect	TCGCAACATCGAGGATGAGCTCTCACGC	Ras homolog enriched in brain (Rheb) encodes a Ras homolog that is the target of the product of gig. It activates the protein kinase encoded by Tor, leading to enlarged cell size	positive	all	1.13971	0.328601
FBgn0041191	Rheb	GAGA type 1	direct	GAAGCGTGAGAGCTCATCCTCGATG	Ras homolog enriched in brain (Rheb) encodes a Ras homolog that is the target of the product of gig. It activates the protein kinase encoded by Tor, leading to enlarged cell size	negative	all	1.13971	0.328601
FBgn0041191	Rheb	GAGA type 1	indirect	ATCGAGGATGAGCTCTCACGCTTCG	Ras homolog enriched in brain (Rheb) encodes a Ras homolog that is the target of the product of gig. It activates the protein kinase encoded by Tor, leading to enlarged cell size	negative	all	1.13971	0.328601
FBgn0086357	sec61alpha	GAGA type 2	indirect	TGCTAGTGCCGAGAA	Sec61 α subunit (Sec61α) encodes a subunit of the the translocon, a protein-conducting channel that mediates the co-translational transport of nascent polypeptides into the endoplasmic reticulum. It is a subunit of the Sec61 heterotrimer that forms the core of translocon channel.	positive	all	1.44256	0.0176425
FBgn0034897	Sesn	GAGA type 2	indirect	TACGAGCAACGAGCGAGAGAGCAAGTGT	Sestrin (Sesn) encodes a stress-inducible protein that suppresses accumulation of reactive oxygen species and inhibits the TORC1 signaling pathway, which allows it to regulate oxidative damage	positive	all	#N/A	#N/A
FBgn0086656	shrb	GAGA type 2	direct	GCAGCATCTTGAGTGTGAGGCAGAGGAA	shrub (shrb) encodes Shrub encodes Vps32/Snf7, a filament-forming subunit of the ESCRT-III complex involved in inward membrane budding. It regulates multiple cellular processes involving ESCRTs activity including multivesicular body biogenesis, cytokinesis, membrane repair and regulation of membrane associated signaling.	positive	all	1.23133	0.0405629
FBgn0086656	shrb	GAGA type 2	direct	TCTTGAGTGTGAGGCAGAGGAACTGGGT	shrub (shrb) encodes Shrub encodes Vps32/Snf7, a filament-forming subunit of the ESCRT-III complex involved in inward membrane budding. It regulates multiple cellular processes involving ESCRTs activity including multivesicular body biogenesis, cytokinesis, membrane repair and regulation of membrane associated signaling.	positive	all	1.23133	0.0405629
FBgn0031455	Snapin	GAGA type 1	indirect	GAAGTCGGTGAGT	Component of the biogenesis of lysosome-related organelles complex-1 (BLOC-1) involved in pigment granule biogenesis (PubMed:20015953). May participate in the coupling of lysosomes to microtubule plus-end-directed kinesin motor (By similarity).	positive	all	#N/A	#N/A
FBgn0261283	SREBP	GAGA type 2	indirect	ACGAATCGCGGAGCCAGAGAAGCGGTAA	Sterol regulatory element binding protein (SREBP) encodes a membrane protein that functions as a master-regulator of lipogenesis. It activates transcription of lipogenic genes upon reduction of lipid or cholesterol levels.	positive	all	1.20644	0.182828
FBgn0003507	srp	GAGA type 2	direct	CACCAAGTCGGAGAGCGAGAGTTGCCCC	serpent (srp) encodes an important transcription factor for the proper development of mesodermal derivatives such as fat body, hemocytes and limph gland. It contributes to endoderm development, hemopoiesis and glucose metabolism.	positive	development	1.45061	0.00892512
FBgn0003507	srp	GAGA type 2	direct	CCAAGTCGGAGAGCGAGAGTTGCCCCGA	serpent (srp) encodes an important transcription factor for the proper development of mesodermal derivatives such as fat body, hemocytes and limph gland. It contributes to endoderm development, hemopoiesis and glucose metabolism.	positive	development	1.45061	0.00892512
FBgn0003507	srp	GAGA type 2	indirect	GGCACAGATAGAGCGAGAGGCAGGGTGG	serpent (srp) encodes an important transcription factor for the proper development of mesodermal derivatives such as fat body, hemocytes and limph gland. It contributes to endoderm development, hemopoiesis and glucose metabolism.	positive	development	1.45061	0.00892512
FBgn0261041	straightjacket	GAGA type 1	direct	ACGGAACAGGAGTGATAAAGCTTTA	straightjacket (stj) encodes a voltage-gated calcium channel subunit involved in neuromuscular junction development and autophagosome maturation	positive	development	31.3424	5.71046e-88
FBgn0052039	Svip	GAGA type 2	indirect	CGGATAATAATCTTGAGAGAATCAATTT	Involved in autophagosome-lysosome fusion and lysosomal membrane organization. Located in lysosomal membrane. Orthologous to human SVIP (small VCP interacting protein)	positive	all	1.29235	0.0647958
FBgn0052039	Svip	GAGA type 2	direct	TGAAAGCAAAGAGAATGAGAAACCACAC	Involved in autophagosome-lysosome fusion and lysosomal membrane organization. Located in lysosomal membrane. Orthologous to human SVIP (small VCP interacting protein)	positive	all	1.29235	0.0647958
FBgn0052039	Svip	GAGA type 1	indirect	AATAATCTTGAGAGAATCAATTTAA	Involved in autophagosome-lysosome fusion and lysosomal membrane organization. Located in lysosomal membrane. Orthologous to human SVIP (small VCP interacting protein)	positive	all	1.29235	0.0647958
FBgn0026323	Tak1	GAGA type 1	direct	GGGCGGGTAGAGAGAATTAAATAGA	TGF-β activated kinase 1 (Tak1) encodes a MAP kinase kinase kinase that functions downstream of the products of imd, Fadd and Diap2. It also functions upstream of the IKK complex in the Imd pathway, a pathway regulating the antibacterial response and other less characterized cellular processes. Upon activation the product of imd, the product of Tak1 can also activate the JNK pathway at the level …	positive	all	1.68856	0.00301259
FBgn0034476	Toll-7	GAGA type 2	indirect	GCGCCACTGTTCTTGAGAGAAGGTACAA	Toll-7 (Toll-7) encodes a plasma membrane Toll receptor that binds to viral glycoproteins, leading to the activation of antiviral defenses including autophagy.	positive	all	0.615178	0.00132695
FBgn0034476	Toll-7	GAGA type 2	indirect	GGTACAAAATGAGAGAGAGCAAATCGTT	Toll-7 (Toll-7) encodes a plasma membrane Toll receptor that binds to viral glycoproteins, leading to the activation of antiviral defenses including autophagy.	positive	all	0.615178	0.00132695
FBgn0034476	Toll-7	GAGA type 1	indirect	ACTGTTCTTGAGAGAAGGTACAAAA	Toll-7 (Toll-7) encodes a plasma membrane Toll receptor that binds to viral glycoproteins, leading to the activation of antiviral defenses including autophagy.	positive	all	0.615178	0.00132695
FBgn0034476	Toll-7	GAGA type 1	indirect	GTACAAAATGAGAGAGAGCAAATCG	Toll-7 (Toll-7) encodes a plasma membrane Toll receptor that binds to viral glycoproteins, leading to the activation of antiviral defenses including autophagy.	positive	all	0.615178	0.00132695
FBgn0030748	Traf-like	GAGA type 2	direct	TGTACAAGGGGAGCTAGAGATATGAACA	TNF-receptor-associated factor-like. Predicted to enable tumor necrosis factor receptor binding activity and ubiquitin protein ligase binding activity. Involved in positive regulation of lipophagy. Predicted to be located in cytoplasm. Predicted to be active in cytoplasmic side of plasma membrane. Is expressed in adult head; excretory system; germ layer derivative; and gut section.	positive	development	0.371751	0.00944742
FBgn0004436	Ubc6	GAGA type 1	indirect	TTTACAATTGAGCGACATGGCAAAA	Ubiquitin conjugating enzyme 6 (Ubc6) encodes an enzyme that acts together with E3 ubiquitin ligases to transfer ubiquitin to target proteins. involved_in negative regulation of intrinsic apoptotic signaling pathway in response to DNA damage by p53 class mediator	positive	all	1.05066	0.722041
FBgn0028671	Vha100-1	GAGA type 2	indirect	GAAGGCCGAAGAGAAGGAGCAGAGCGAG	Vacuolar H[+] ATPase 100kD subunit 1 (Vha100-1) encodes a subunit of the V0 domain of V-ATPase, which acidifies autophagosomes and lysosomes in neurons. The product of Vha100-1 is involved in autophagosome maturation, tracheal branching and eye development	positive	all	0.891162	0.430098
FBgn0021814	Vps28	GAGA type 1	indirect	TAAGCGCACGAGTGATAACCGTCTC	Vacuolar protein sorting 28 (Vps28) encodes a member of the ESCRT-I complex, which sorts certain endocytosed receptors for degradation via the multivesicular body	positive	all	1.02455	0.890186
FBgn0021814	Vps28	GAGA type 1	direct	TTTGAAGTGGAGAGACGGTTATCAC	Vacuolar protein sorting 28 (Vps28) encodes a member of the ESCRT-I complex, which sorts certain endocytosed receptors for degradation via the multivesicular body	positive	all	1.02455	0.890186
FBgn0038593	Vps39	GAGA type 1	indirect	TAAAAAGTTGAGTGAAATTTTAAAT	Vacuolar protein sorting 39 (Vps39) encodes a subunit of the homotypic fusion and vacuole protein sorting (HOPS) complex required for autophagosome maturation	positive	all	0.889585	0.512746
FBgn0260862	Vti1a	GAGA type 1	indirect	GCTTTATGCGAGTGGAGATTCTTTG	Vesicle transport through interaction with t-SNAREs 1a (Vti1a) encodes a protein involved in vesicle trafficking. [	positive	all	0.736651	0.0365831
FBgn0264751	Vti1b	GAGA type 1	indirect	TTGAGTTCAGAGAGAAATATAAAAC	Predicted to enable SNAP receptor activity and SNARE binding activity. Predicted to be involved in several processes, including Golgi vesicle transport; regulation of protein localization to plasma membrane; and retrograde transport, endosome to Golgi. Predicted to be part of SNARE complex. Predicted to be active in Golgi apparatus; cytoplasmic vesicle membrane; and endoplasmic reticulum membrane…	positive	all	1.09211	0.571338
FBgn0011739	warts	GAGA type 2	indirect	ACATTGTTTTGAGTAAGAATGAAAATAT	warts (wts) encodes a tumor suppressor kinase in the Hippo pathway involved in the control of tissue growth. It also plays a post-mitotic role in R8 photoreceptor cells where it antagonizes the product of melt to control the bistable choice of Rhodospin expression	positive	all	0.693348	0.0129969
miRNA
stress -related
DNA breaks

## Sheet: ncRNA_-500_-1000
FBgn	Symbol	Name	GAGA type	Direction	Site sequence		padj	Fold change	ncRNA -500…+1	testis-specific ncRNA from Vedelek et al., 2018	testis-nonspecific ncRNA, expressed in Trl mutant testes	testis- nonspecific ncRNA (from Vedelek et al., 2018)
FBgn0263405	lncRNA:CR43451	long non-coding RNA:CR43451	GAGA type 1	indirect	GTGAAAGAGGAGAGATCCCAAAAAT		1.80695e-22	4370.43	0	0	1	1
FBgn0263405	lncRNA:CR43451	long non-coding RNA:CR43451	GAGA type 1	indirect	GTGACATTTGAGTGATTCGAGCGAC		1.80695e-22	4370.43	0	0	1	1
FBgn0264570	lncRNA:CR43942	long non-coding RNA:CR43942	GAGA type 1	indirect	GTGTCATTAGAGATCTAATTCTGTT		5.95982e-21	3236.16	1	0	0	0
FBgn0250817	lncRNA:CR40465	long non-coding RNA:CR40465	GAGA type 1	indirect	GAGAATCTAGAGAGAATCGCAGCTT		4.27537e-19	2329.64	1	0	0	0
FBgn0250817	lncRNA:CR40465	long non-coding RNA:CR40465	GAGA type 1	direct	AACTTAAACGAGCGAGGATAAGCTC		4.27537e-19	2329.64	1	0	0	0
FBgn0265079	lncRNA:CR44190	long non-coding RNA:CR44190	GAGA type 1	indirect	TCAATAGACGAGTGGGGATGGGAAT		7.30486e-16	1114.14	1	0	0	0
FBgn0265079	lncRNA:CR44190	long non-coding RNA:CR44190	GAGA type 2	indirect	GCACGCAAATGAGCGAGAGTCAGCCGAA		7.30486e-16	1114.14	1	0	0	0
FBgn0265584	lncRNA:CR44411	long non-coding RNA:CR44411	GAGA type 1	indirect	TGCAACTTTGAGAGATAACAAAAGT		1.6741e-12	551.25	1	0	0	0
FBgn0265584	lncRNA:CR44411	long non-coding RNA:CR44411	GAGA type 1	indirect	GGAGGCAGGGAGAGAGAGAGAGAGA		1.6741e-12	551.25	1	0	0	0
FBgn0265584	lncRNA:CR44411	long non-coding RNA:CR44411	GAGA type 1	indirect	AGGCAGGGAGAGAGAGAGAGAGAGT		1.6741e-12	551.25	1	0	0	0
FBgn0265584	lncRNA:CR44411	long non-coding RNA:CR44411	GAGA type 1	indirect	AGGGAGAGAGAGAGAGAGAGTGAGC		1.6741e-12	551.25	1	0	0	0
FBgn0265584	lncRNA:CR44411	long non-coding RNA:CR44411	GAGA type 2	direct	ATCGATGCGCGAGTGTGAGGTGCCCGGC		1.6741e-12	551.25	1	0	0	0
FBgn0265584	lncRNA:CR44411	long non-coding RNA:CR44411	GAGA type 2	indirect	CGGAGGCAGGGAGAGAGAGAGAGAGAGT		1.6741e-12	551.25	1	0	0	0
FBgn0265584	lncRNA:CR44411	long non-coding RNA:CR44411	GAGA type 2	indirect	GAGGCAGGGAGAGAGAGAGAGAGAGTGA		1.6741e-12	551.25	1	0	0	0
FBgn0265584	lncRNA:CR44411	long non-coding RNA:CR44411	GAGA type 2	indirect	GGCAGGGAGAGAGAGAGAGAGAGTGAGC		1.6741e-12	551.25	1	0	0	0
FBgn0265584	lncRNA:CR44411	long non-coding RNA:CR44411	GAGA type 2	indirect	CAGGGAGAGAGAGAGAGAGAGTGAGCGG		1.6741e-12	551.25	1	0	0	0
FBgn0265584	lncRNA:CR44411	long non-coding RNA:CR44411	GAGA type 2	indirect	GGGAGAGAGAGAGAGAGAGTGAGCGGAG		1.6741e-12	551.25	1	0	0	0
FBgn0265584	lncRNA:CR44411	long non-coding RNA:CR44411	GAGA type 2	indirect	GAGAGAGAGAGAGAGTGAGCGGAGAAAA		1.6741e-12	551.25	1	0	0	0
FBgn0264879	lncRNA:CR44070	long non-coding RNA:CR44070	GAGA type 1	direct	AAATTTGGTGAGCTCGAGTGCGAAC		2.72787e-12	545.985	0	0	0	0
FBgn0264879	lncRNA:CR44070	long non-coding RNA:CR44070	GAGA type 2	direct	TAAATTTGGTGAGCTCGAGTGCGAACAC		2.72787e-12	545.985	0	0	0	0
FBgn0266306	lncRNA:CR44971	long non-coding RNA:CR44971	GAGA type 1	direct	TGAATTTATGAGTTCAATAATTTTA		1.35252e-15	439.001	1	0	0	0
FBgn0266306	lncRNA:CR44971	long non-coding RNA:CR44971	GAGA type 1	indirect	GCGGCCGAGGAGTGACAACAAGCCG		1.35252e-15	439.001	1	0	0	0
FBgn0266306	lncRNA:CR44971	long non-coding RNA:CR44971	GAGA type 2	direct	CTGCATATCCGAGGCTGAGTGCAGTCTT		1.35252e-15	439.001	1	0	0	0
FBgn0266306	lncRNA:CR44971	long non-coding RNA:CR44971	GAGA type 2	direct	GCTGCATGCGGAGACAGAGCTCATCTCC		1.35252e-15	439.001	1	0	0	0
FBgn0267229	lncRNA:CR45669	long non-coding RNA:CR45669	GAGA type 2	direct	AGCGGATTTTGAGGGCTCTTCACGTCTT		1.5226e-10	358.146	1	0	1	1
FBgn0267229	lncRNA:CR45669	long non-coding RNA:CR45669	GAGA type 2	direct	TTTTTGGCGAGAGAGCGAGAGGAACTGG		1.5226e-10	358.146	1	0	1	1
FBgn0267229	lncRNA:CR45669	long non-coding RNA:CR45669	GAGA type 2	direct	TTTGGCGAGAGAGCGAGAGGAACTGGCA		1.5226e-10	358.146	1	0	1	1
FBgn0263290	lncRNA:CR43399	long non-coding RNA:CR43399	GAGA type 1	direct	AAAGAGAAAGAGAGAGCGAGAGAGA		3.21186e-10	328.474	1	0	0	0
FBgn0263290	lncRNA:CR43399	long non-coding RNA:CR43399	GAGA type 1	direct	AGAGAGAGCGAGAGAGAAAGAGGGT		3.21186e-10	328.474	1	0	0	0
FBgn0263290	lncRNA:CR43399	long non-coding RNA:CR43399	GAGA type 2	direct	TAGAAAGAAAGAGAAAGAGAGAGCGAGA		3.21186e-10	328.474	1	0	0	0
FBgn0263290	lncRNA:CR43399	long non-coding RNA:CR43399	GAGA type 2	direct	AAGAGAAAGAGAGAGCGAGAGAGAAAGA		3.21186e-10	328.474	1	0	0	0
FBgn0263290	lncRNA:CR43399	long non-coding RNA:CR43399	GAGA type 2	direct	GAGAAAGAGAGAGCGAGAGAGAAAGAGG		3.21186e-10	328.474	1	0	0	0
FBgn0263290	lncRNA:CR43399	long non-coding RNA:CR43399	GAGA type 2	direct	GAGAGCGAGAGAGAAAGAGGGTGTGACG		3.21186e-10	328.474	1	0	0	0
FBgn0267935	lncRNA:CR46215	long non-coding RNA:CR46215	GAGA type 1	indirect	CAGCCAAATGAGAGATGCAAAAATT		1.49799e-10	317.559	1	0	0	0
FBgn0267158	lncRNA:CR45598	long non-coding RNA:CR45598	GAGA type 2	indirect	TCGGGGGGATGAGGATGAGGGCGTAGAT		5.9539e-10	274.596	0	0	0	0
FBgn0262895	lncRNA:CR43250	long non-coding RNA:CR43250	GAGA type 2	direct	TTGTATTTATGAATGAGAGTGCCCGTGG		1.28062e-07	162.089	1	0	1	1
FBgn0262895	lncRNA:CR43250	long non-coding RNA:CR43250	GAGA type 2	direct	TCGGATCGACGAGCGCGAGAATGCACAT		1.28062e-07	162.089	1	0	1	1
FBgn0266800	lncRNA:CR45262	long non-coding RNA:CR45262	GAGA type 1	indirect	CCCTGAGATGAGCTCTGAAACTATT		4.78725e-07	144.394	0	0	0	0
FBgn0266800	lncRNA:CR45262	long non-coding RNA:CR45262	GAGA type 2	indirect	CTATTTAAACGAGTGCTCTTAAAGTAAT		4.78725e-07	144.394	0	0	0	0
FBgn0058469	lncRNA:CR40469	long non-coding RNA:CR40469	GAGA type 1	direct	TGAATAACCGAGCTCCAATTTCCAC		5.50564e-10	140.113	0	0	1	1
FBgn0266698	lncRNA:CR45188	long non-coding RNA:CR45188	GAGA type 1	direct	TGGATATCGGAGTGAAATGGTAAAG		4.16576e-26	126.234	1	0	0	0
FBgn0266862	lncRNA:CR45323	long non-coding RNA:CR45323	GAGA type 2	direct	TGGTTACGGCTCTTGAGAGTAATTTTAA		2.05092e-08	124.214	0	0	0	0
FBgn0266862	lncRNA:CR45323	long non-coding RNA:CR45323	GAGA type 2	indirect	TTAAAATTACTCTCAAGAGCCGTAACCA		2.05092e-08	124.214	0	0	0	0
FBgn0266774	lncRNA:CR45239	long non-coding RNA:CR45239	GAGA type 1	indirect	CATTAGCCGGAGCTCTGATTTCATA		5.3707e-06	116.047	1	0	0	0
FBgn0266774	lncRNA:CR45239	long non-coding RNA:CR45239	GAGA type 1	indirect	GCATTAGCTGAGCTTTTTAGATTCT		5.3707e-06	116.047	1	0	0	0
FBgn0266589	lncRNA:CR45114	long non-coding RNA:CR45114	GAGA type 1	direct	GACTCATCGGAGCGAATTATGAACT		6.0188e-15	95.695	1	0	0	0
FBgn0266764	lncRNA:CR45229	long non-coding RNA:CR45229	GAGA type 1	direct	CAGCACTTTGAGTGATTTATTTCAC		1.79611e-07	90.233	1	0	0	0
FBgn0266764	lncRNA:CR45229	long non-coding RNA:CR45229	GAGA type 1	indirect	CTTTTCCGTGAGTGGGTCGCCTTGC		1.79611e-07	90.233	1	0	0	0
FBgn0266764	lncRNA:CR45229	long non-coding RNA:CR45229	GAGA type 1	indirect	TGCAAAACTGAGATCTTTATTATTT		1.79611e-07	90.233	1	0	0	0
FBgn0266764	lncRNA:CR45229	long non-coding RNA:CR45229	GAGA type 2	direct	AAGTCGGAACGAGAGTGAGGTTCAGGTT		1.79611e-07	90.233	1	0	0	0
FBgn0267926	lncRNA:CR46207	long non-coding RNA:CR46207	GAGA type 1	direct	TTCTGTTATTCTCTCTGATTTTAAA		2.79955e-05	89.6086	1	0	1	1
FBgn0267926	lncRNA:CR46207	long non-coding RNA:CR46207	GAGA type 1	indirect	TTAAAATCAGAGAGAATAACAGAAA		2.79955e-05	89.6086	1	0	1	1
FBgn0267926	lncRNA:CR46207	long non-coding RNA:CR46207	GAGA type 2	direct	CTAGAAGGTAGAGATAGAGGTATTCAAA		2.79955e-05	89.6086	1	0	1	1
FBgn0264512	lncRNA:CR43911	long non-coding RNA:CR43911	GAGA type 1	direct	CGGAACAAAGAGTGAAGACACTGAA		3.66156e-09	89.4437	1	0	0	0
FBgn0264512	lncRNA:CR43911	long non-coding RNA:CR43911	GAGA type 2	indirect	ACCAAGAATAGAGCTAGAGTTTTCATTT		3.66156e-09	89.4437	1	0	0	0
FBgn0266139	lncRNA:CR44845	long non-coding RNA:CR44845	GAGA type 1	indirect	CTTTCCTGGGAGAGATTTCGTTGCA		5.7752e-07	76.4667	1	0	0	0
FBgn0266139	lncRNA:CR44845	long non-coding RNA:CR44845	GAGA type 1	direct	AGGCCTCTCGAGTGAATCTTCAAAT		5.7752e-07	76.4667	1	0	0	0
FBgn0266139	lncRNA:CR44845	long non-coding RNA:CR44845	GAGA type 2	direct	TTCCAAACTTGAGGCCTCTCGAGTGAAT		5.7752e-07	76.4667	1	0	0	0
FBgn0264709	lncRNA:CR43978	long non-coding RNA:CR43978	GAGA type 1	direct	CCTGCAACTGAGTTCAGAATTTAAT		2.22508e-13	76.1199	1	0	0	0
FBgn0266643	lncRNA:CR45150	long non-coding RNA:CR45150	GAGA type 2	direct	TTGTATGACATCTTAAGAGCCCCAAATC		0.000256088	72.4586	0	0	0	0
FBgn0266154	lncRNA:CR44860	long non-coding RNA:CR44860	GAGA type 1	indirect	TTTCTTGTTGAGCTCGAATAAAAAT		0.000178967	70.0672	1	0	0	0
FBgn0265424	lncRNA:TS14	long noncoding RNA: testis-specific 14	GAGA type 2	direct	GCTCAAGGAAGAGAATGAGCCAAATATT		1.05244e-22	67.1761	0	1	0	0
FBgn0283626	lncRNA:CR46299	long non-coding RNA:CR46299	GAGA type 1	direct	TCAAAACTAGAGAGAATGCAATAGT		1.02488e-18	65.2485	0	0	0	0
FBgn0264471	lncRNA:CR43879	long non-coding RNA:CR43879	GAGA type 1	indirect	TGTGTATCTGAGTGAGTGCAACAAA		7.92795e-24	62.4261	1	0	0	0
FBgn0264471	lncRNA:CR43879	long non-coding RNA:CR43879	GAGA type 1	direct	TGTATCTGTGAGAGAAGACAACTCA		7.92795e-24	62.4261	1	0	0	0
FBgn0264471	lncRNA:CR43879	long non-coding RNA:CR43879	GAGA type 2	indirect	ATATGCGAGCAAGAAAGAGCGAGGTTAA		7.92795e-24	62.4261	1	0	0	0
FBgn0263505	lncRNA:CR43494	long non-coding RNA:CR43494	GAGA type 1	indirect	ATTAAAGGCGAGTGACCATGGAAAC		4.904e-24	58.3158	1	0	0	0
FBgn0263505	lncRNA:CR43494	long non-coding RNA:CR43494	GAGA type 1	indirect	GCGGGACAGGAGAGACAACAAGGTT		4.904e-24	58.3158	1	0	0	0
FBgn0265886	lncRNA:CR44675	long non-coding RNA:CR44675	GAGA type 1	direct	CCCAAAGGGGAGTGACTGTCATTCC		2.30812e-27	57.1695	0	0	0	0
FBgn0267562	lncRNA:CR45902	long non-coding RNA:CR45902	GAGA type 2	indirect	CTAAACAATGAAGTAAGAGTAAACAGTT		3.8813e-23	56.9406	0	0	0	0
FBgn0287465	lncRNA:CR46454	long non-coding RNA:CR46454	GAGA type 1	indirect	GCTGTTGGTGAGTGAGAGTGCGACA		1.08748e-26	55.8442	1	0	0	0
FBgn0287465	lncRNA:CR46454	long non-coding RNA:CR46454	GAGA type 1	indirect	GAGGAGAGGGAGAGAGAAGGCAACC		1.08748e-26	55.8442	1	0	0	0
FBgn0287465	lncRNA:CR46454	long non-coding RNA:CR46454	GAGA type 2	indirect	CGCTGTTGGTGAGTGAGAGTGCGACAGA		1.08748e-26	55.8442	1	0	0	0
FBgn0287465	lncRNA:CR46454	long non-coding RNA:CR46454	GAGA type 2	direct	GGAAACATCTGAGAAAGAGAGGGCACGA		1.08748e-26	55.8442	1	0	0	0
FBgn0287465	lncRNA:CR46454	long non-coding RNA:CR46454	GAGA type 2	indirect	TTGAAGAGGAGAGGGAGAGAGAAGGCAA		1.08748e-26	55.8442	1	0	0	0
FBgn0287465	lncRNA:CR46454	long non-coding RNA:CR46454	GAGA type 2	direct	GCCAAGCAGAGAGCATGAGACAGTGTGT		1.08748e-26	55.8442	1	0	0	0
FBgn0265739	lncRNA:CR44546	long non-coding RNA:CR44546	GAGA type 1	indirect	GGTCAATTAGAGAGATACATAAATA		1.56383e-08	55.0401	1	0	0	0
FBgn0265739	lncRNA:CR44546	long non-coding RNA:CR44546	GAGA type 1	indirect	CGCTGCACTGAGAGAAAATGTTATA		1.56383e-08	55.0401	1	0	0	0
FBgn0265739	lncRNA:CR44546	long non-coding RNA:CR44546	GAGA type 2	direct	TGCCACAGTTGAACAAGAGTACGAAAAA		1.56383e-08	55.0401	1	0	0	0
FBgn0265739	lncRNA:CR44546	long non-coding RNA:CR44546	GAGA type 2	direct	CGCGGGGGAAGAGACCGAGAATGTGGCC		1.56383e-08	55.0401	1	0	0	0
FBgn0265095	lncRNA:CR44200	long non-coding RNA:CR44200	GAGA type 1	indirect	TGTGAATAGGAGAGATGTATCCAAA		9.25863e-15	54.4613	1	0	0	0
FBgn0265095	lncRNA:CR44200	long non-coding RNA:CR44200	GAGA type 1	direct	GATGTGAACGAGATCGGATGTGAGG		9.25863e-15	54.4613	1	0	0	0
FBgn0265095	lncRNA:CR44200	long non-coding RNA:CR44200	GAGA type 2	indirect	TTTTATTCCCGAGTACTCGTACACCTAT		9.25863e-15	54.4613	1	0	0	0
FBgn0264515	lncRNA:CR43914	long non-coding RNA:CR43914	GAGA type 2	indirect	AGGAAAAGTCGAGCTCGAGAACGACGGA		1.14924e-29	54.022	1	0	0	0
FBgn0264515	lncRNA:CR43914	long non-coding RNA:CR43914	GAGA type 2	indirect	ACAAACCGAAGAGTGCGAGGAAGTGGGC		1.14924e-29	54.022	1	0	0	0
FBgn0264515	lncRNA:CR43914	long non-coding RNA:CR43914	GAGA type 2	indirect	ATCGCAGACGGAGAATGAGAAAAATCAT		1.14924e-29	54.022	1	0	0	0
FBgn0265581	lncRNA:CR44408	long non-coding RNA:CR44408	GAGA type 1	direct	TTGGTAACGGAGAGATATTGGTAAA		7.2524e-18	52.9523	1	0	0	0
FBgn0266209	lncRNA:CR44904	long non-coding RNA:CR44904	GAGA type 1	direct	ATCGCCACTGAGTGATGAAGAGGAG		5.6129e-21	52.683	1	0	0	0
FBgn0266209	lncRNA:CR44904	long non-coding RNA:CR44904	GAGA type 1	direct	GCAGCGACTGAGAGATATGATAACA		5.6129e-21	52.683	1	0	0	0
FBgn0266209	lncRNA:CR44904	long non-coding RNA:CR44904	GAGA type 1	direct	TGTTTCCTTGAGAGATATCTTTATG		5.6129e-21	52.683	1	0	0	0
FBgn0266209	lncRNA:CR44904	long non-coding RNA:CR44904	GAGA type 1	direct	AGCAGCAACGAGAGAGCGCAACAAG		5.6129e-21	52.683	1	0	0	0
FBgn0266209	lncRNA:CR44904	long non-coding RNA:CR44904	GAGA type 2	indirect	GGAAAAAAGAGAGCAAGAGCCAGAGCAG		5.6129e-21	52.683	1	0	0	0
FBgn0266209	lncRNA:CR44904	long non-coding RNA:CR44904	GAGA type 2	indirect	AAGAGAGCAAGAGCCAGAGCAGCGGTAG		5.6129e-21	52.683	1	0	0	0
FBgn0266209	lncRNA:CR44904	long non-coding RNA:CR44904	GAGA type 2	direct	CATACCTCATGAGATAGAGAGCGCTAAA		5.6129e-21	52.683	1	0	0	0
FBgn0266209	lncRNA:CR44904	long non-coding RNA:CR44904	GAGA type 2	direct	CTGGGGATGGGAGCGAGAGAGAGTGCTG		5.6129e-21	52.683	1	0	0	0
FBgn0266209	lncRNA:CR44904	long non-coding RNA:CR44904	GAGA type 2	direct	GGATGGGAGCGAGAGAGAGTGCTGCTGC		5.6129e-21	52.683	1	0	0	0
FBgn0267949	lncRNA:CR46229	long non-coding RNA:CR46229	GAGA type 1	direct	ATTCACTGAGAGCGAGGATTGTTGT		4.47782e-16	51.7088	0	0	0	0
FBgn0267949	lncRNA:CR46229	long non-coding RNA:CR46229	GAGA type 2	direct	AAAATTCACTGAGAGCGAGGATTGTTGT		4.47782e-16	51.7088	0	0	0	0
FBgn0266893	lncRNA:CR45353	long non-coding RNA:CR45353	GAGA type 1	indirect	GTGATATTGGAGCTCTGGCATTGAA		1.07017e-15	50.9598	1	0	0	0
FBgn0266893	lncRNA:CR45353	long non-coding RNA:CR45353	GAGA type 1	indirect	GGGCAATTCGAGCTCCAATCGAGTG		1.07017e-15	50.9598	1	0	0	0
FBgn0266893	lncRNA:CR45353	long non-coding RNA:CR45353	GAGA type 1	indirect	GCTCCAATCGAGTGGCGATATTATC		1.07017e-15	50.9598	1	0	0	0
FBgn0266893	lncRNA:CR45353	long non-coding RNA:CR45353	GAGA type 1	direct	ACTCGATTGGAGCTCGAATTGCCCC		1.07017e-15	50.9598	1	0	0	0
FBgn0266893	lncRNA:CR45353	long non-coding RNA:CR45353	GAGA type 1	direct	TCAATGCCAGAGCTCCAATATCACT		1.07017e-15	50.9598	1	0	0	0
FBgn0266893	lncRNA:CR45353	long non-coding RNA:CR45353	GAGA type 2	indirect	ACACCCACCGGAGATCGAGAGCCCGGGG		1.07017e-15	50.9598	1	0	0	0
FBgn0267032	lncRNA:CR45476	long non-coding RNA:CR45476	GAGA type 2	direct	CGTATAAAGCGAGAAGGAGTGATGTGGG		0.001284	50.6528	0	0	0	0
FBgn0267565	lncRNA:CR45905	long non-coding RNA:CR45905	GAGA type 1	indirect	AGGGGAGAGGAGAGAGTCTAGAATT		1.39322e-05	50.4658	1	0	0	0
FBgn0267565	lncRNA:CR45905	long non-coding RNA:CR45905	GAGA type 1	direct	CCATCCGATGAGTGATATTTTTAAG		1.39322e-05	50.4658	1	0	0	0
FBgn0267565	lncRNA:CR45905	long non-coding RNA:CR45905	GAGA type 2	direct	CTAAACAATGAAGTAAGAGTAAACAGTT		1.39322e-05	50.4658	1	0	0	0
FBgn0265907	lncRNA:CR44696	long non-coding RNA:CR44696	GAGA type 1	direct	GAGTCATGGGAGTGGTATAGGTATG		2.68812e-12	48.5746	0	0	0	0
FBgn0266909	lncRNA:CR45369	long non-coding RNA:CR45369	GAGA type 1	direct	AAAAAAGAGGAGAGAAAAAGAGAAG		0.00212191	48.0227	0	0	1	1
FBgn0266909	lncRNA:CR45369	long non-coding RNA:CR45369	GAGA type 1	direct	AAAGAAGATGAGAGAAAAAGAGAAG		0.00212191	48.0227	0	0	1	1
FBgn0266909	lncRNA:CR45369	long non-coding RNA:CR45369	GAGA type 2	direct	AAAGAAGAAAGAGACAGAGGAAAAGGAA		0.00212191	48.0227	0	0	1	1
FBgn0265375	lncRNA:CR44316	long non-coding RNA:CR44316	GAGA type 1	direct	AGTCTGGAGGAGAGATCGTGCTCTG		6.54726e-15	47.6968	0	0	0	0
FBgn0265375	lncRNA:CR44316	long non-coding RNA:CR44316	GAGA type 1	indirect	GAGATCAGCGAGCGAAAAAGTTAAG		6.54726e-15	47.6968	0	0	0	0
FBgn0264987	lncRNA:CR44138	long non-coding RNA:CR44138	GAGA type 1	direct	AGATTATTCGAGTGGGAATCGAAAA		2.68061e-29	44.7461	1	0	0	0
FBgn0264987	lncRNA:CR44138	long non-coding RNA:CR44138	GAGA type 1	indirect	TTTAGAGTTGAGAGACAATCATGGC		2.68061e-29	44.7461	1	0	0	0
FBgn0264987	lncRNA:CR44138	long non-coding RNA:CR44138	GAGA type 2	indirect	TTATCTTATCGAGTGGGAGCTTTTATTT		2.68061e-29	44.7461	1	0	0	0
FBgn0264338	lncRNA:CR43794	long non-coding RNA:CR43794	GAGA type 1	indirect	TTGCGAGGGGAGTGGGAATAATATT		3.54298e-14	43.8777	0	0	0	0
FBgn0264349	lncRNA:CR43805	long non-coding RNA:CR43805	GAGA type 2	direct	TCCTTCGATAGAGTACTCTACAGTAGTT		3.30801e-16	43.7098	0	0	0	0
FBgn0264349	lncRNA:CR43805	long non-coding RNA:CR43805	GAGA type 2	indirect	AACTACTGTAGAGTACTCTATCGAAGGA		3.30801e-16	43.7098	0	0	0	0
FBgn0266045	lncRNA:CR44810	long non-coding RNA:CR44810	GAGA type 1	direct	TAACAGGGCGAGCGATTATATAAGG		0.000511598	43.6892	1	0	0	0
FBgn0264379	lncRNA:CR43831	long non-coding RNA:CR43831	GAGA type 1	indirect	GAAAGATGGGAGAGAGCGGCATATT		0.00119541	39.5119	0	0	1	1
FBgn0266790	lncRNA:CR45255	long non-coding RNA:CR45255	GAGA type 1	indirect	ATTGTCCGCGAGCGACAAAACTGAC		1.07977e-09	36.2152	0	0	0	0
FBgn0265674	lncRNA:CR44481	long non-coding RNA:CR44481	GAGA type 2	direct	AGGAGCCAAGGAGAAGGAGTCCGGATGA		0.00337945	36.0552	0	0	1	1
FBgn0266788	lncRNA:CR45253	long non-coding RNA:CR45253	GAGA type 1	direct	AACCATGTAGAGTTCTGTAAATTTG		8.10132e-12	34.5248	1	0	0	0
FBgn0266788	lncRNA:CR45253	long non-coding RNA:CR45253	GAGA type 2	indirect	GAGATGGGATGAGGAGGAGTAAATCAAA		8.10132e-12	34.5248	1	0	0	0
FBgn0265909	lncRNA:CR44698	long non-coding RNA:CR44698	GAGA type 1	direct	CCATTTGGTGAGCGATTTATGTGAG		0.00191886	33.0831	0	0	0	0
FBgn0265939	lncRNA:CR44726	long non-coding RNA:CR44726	GAGA type 1	indirect	CTCAGTTTCTCGAGACGATCGGACG		1.93525e-19	32.9151	1	0	0	0
FBgn0263337	lncRNA:CR43418	long non-coding RNA:CR43418	GAGA type 1	indirect	AAAGCCACAGAGCGAGAATTTTAGT		3.7933e-30	30.2344	0	0	0	0
FBgn0263337	lncRNA:CR43418	long non-coding RNA:CR43418	GAGA type 1	indirect	TTAGTCACTGAGCTCATTATTATTA		3.7933e-30	30.2344	0	0	0	0
FBgn0265741	lncRNA:CR44548	long non-coding RNA:CR44548	GAGA type 1	indirect	CCGGAAATGGAGCGACTTAATTTGT		9.87469e-10	29.8759	1	0	1	1
FBgn0265741	lncRNA:CR44548	long non-coding RNA:CR44548	GAGA type 1	indirect	CCTCCGATTGAGATCTCTAAGGAAG		9.87469e-10	29.8759	1	0	1	1
FBgn0265741	lncRNA:CR44548	long non-coding RNA:CR44548	GAGA type 1	indirect	CTCTTCGGCGAGCGAGTTAATAACG		9.87469e-10	29.8759	1	0	1	1
FBgn0265741	lncRNA:CR44548	long non-coding RNA:CR44548	GAGA type 2	indirect	TCCTCCGATTGAGATCTCTAAGGAAGCT		9.87469e-10	29.8759	1	0	1	1
FBgn0266040	lncRNA:CR44805	long non-coding RNA:CR44805	GAGA type 2	indirect	AATGAAATACGAGTACTCTACGCAACTG		3.62579e-11	29.4437	0	1	0	0
FBgn0265957	lncRNA:CR44744	long non-coding RNA:CR44744	GAGA type 1	indirect	GTGGCCATAGAGTGAGCATTTTTAT		4.54252e-14	27.337	1	0	0	0
FBgn0265957	lncRNA:CR44744	long non-coding RNA:CR44744	GAGA type 1	indirect	TTTTTATAAGAGCGAAGATCGTAAA		4.54252e-14	27.337	1	0	0	0
FBgn0263502	lncRNA:CR43491	long non-coding RNA:CR43491	GAGA type 1	indirect	TGAGTGTACGAGTGAGTACTTGAAT		2.24761e-24	26.7232	0	0	0	0
FBgn0263502	lncRNA:CR43491	long non-coding RNA:CR43491	GAGA type 1	indirect	TAAATAAACGAGTGATTATTCAAGA		2.24761e-24	26.7232	0	0	0	0
FBgn0266588	lncRNA:CR45113	long non-coding RNA:CR45113	GAGA type 1	indirect	GACTCATCGGAGCGAATTATGAACT		1.07529e-07	26.5318	1	0	0	0
FBgn0261861	lncRNA:CR42790	long non-coding RNA:CR42790	GAGA type 1	indirect	GGAGTTACGGAGTGAATTATCAGTA		2.36195e-12	26.1744	1	0	0	0
FBgn0265908	lncRNA:CR44697	long non-coding RNA:CR44697	GAGA type 1	direct	GTAGAGCGAGAGAGAGGAAGAGAGA		0.0383755	25.9605	1	0	0	0
FBgn0265908	lncRNA:CR44697	long non-coding RNA:CR44697	GAGA type 1	direct	AGAGGGATGGAGAGATGTGTGGAGA		0.0383755	25.9605	1	0	0	0
FBgn0265908	lncRNA:CR44697	long non-coding RNA:CR44697	GAGA type 1	indirect	GCTTTTCTCGAGTGACTCGGCTGCT		0.0383755	25.9605	1	0	0	0
FBgn0265908	lncRNA:CR44697	long non-coding RNA:CR44697	GAGA type 1	direct	CCATTTGGTGAGCGATTTATGTGAG		0.0383755	25.9605	1	0	0	0
FBgn0265908	lncRNA:CR44697	long non-coding RNA:CR44697	GAGA type 2	direct	AGCGGCGGTAGAGCGAGAGAGAGGAAGA		0.0383755	25.9605	1	0	0	0
FBgn0265908	lncRNA:CR44697	long non-coding RNA:CR44697	GAGA type 2	direct	GCGGTAGAGCGAGAGAGAGGAAGAGAGA		0.0383755	25.9605	1	0	0	0
FBgn0265908	lncRNA:CR44697	long non-coding RNA:CR44697	GAGA type 2	direct	GAGCGAGAGAGAGGAAGAGAGATGGCGA		0.0383755	25.9605	1	0	0	0
FBgn0265908	lncRNA:CR44697	long non-coding RNA:CR44697	GAGA type 2	direct	AAGAGCCATTGAGTCGGAGAGGGATGGA		0.0383755	25.9605	1	0	0	0
FBgn0265908	lncRNA:CR44697	long non-coding RNA:CR44697	GAGA type 2	indirect	GTGTTCGCCAGAGTGAGAGTGGCAGAGA		0.0383755	25.9605	1	0	0	0
FBgn0267542	asRNA:CR45882	antisense RNA:CR45882	GAGA type 1	direct	CCAATTTGCGAGTGACAAGGGTTTT		2.08025e-17	25.8985	0	0	0	0
FBgn0267542	asRNA:CR45882	antisense RNA:CR45882	GAGA type 2	indirect	GTGCCAAACGGAGCACGAGTTGTAAGAG		2.08025e-17	25.8985	0	0	0	0
FBgn0263867	lncRNA:CR43714	long non-coding RNA:CR43714	GAGA type 1	direct	GAGTGGAGGGAGAGATTCGCGCAAC		2.27065e-15	25.883	0	0	1	1
FBgn0263867	lncRNA:CR43714	long non-coding RNA:CR43714	GAGA type 2	direct	GACACGAGTGGAGGGAGAGATTCGCGCA		2.27065e-15	25.883	0	0	1	1
FBgn0263867	lncRNA:CR43714	long non-coding RNA:CR43714	GAGA type 2	indirect	ACATTGGACTGAGACTGAGGATAAGGGT		2.27065e-15	25.883	0	0	1	1
FBgn0266885	lncRNA:CR45346	long non-coding RNA:CR45346	GAGA type 2	indirect	TCATCCCGTCGAGTGCTAGCGAAACATC		0.0354178	25.3587	0	0	0	0
FBgn0264083	lncRNA:CR43752	long non-coding RNA:CR43752	GAGA type 1	direct	GGGGAAGACGAGCGATGCGGGTTTT		4.43293e-09	23.9928	0	0	0	0
FBgn0265164	lncRNA:CR44233	long non-coding RNA:CR44233	GAGA type 1	indirect	AACACAATGGAGAGAAAAATCCAAC		0.00028183	23.4391	0	0	1	1
FBgn0267257	lncRNA:CR45693	long non-coding RNA:CR45693	GAGA type 1	indirect	AATTCGAAAGAGCTCAAGCCATTTG		3.73651e-13	23.4025	1	0	0	0
FBgn0267257	lncRNA:CR45693	long non-coding RNA:CR45693	GAGA type 2	indirect	ATTCAAACAAGAGACGGAGCCCATAACC		3.73651e-13	23.4025	1	0	0	0
FBgn0266366	lncRNA:CR45014	long non-coding RNA:CR45014	GAGA type 1	direct	GCTTTAGTCGAGTTCCCCGAATATA		4.35201e-07	23.376	1	0	1	1
FBgn0267655	lncRNA:CR45993	long non-coding RNA:CR45993	GAGA type 1	indirect	TGGCGTACAGAGAGAAAAACATACT		1.23065e-12	22.8089	0	0	0	0
FBgn0267260	lncRNA:CR45696	long non-coding RNA:CR45696	GAGA type 1	direct	GCTGAGGGTGAGAGAGTTTTGCAGT		0.000117488	21.3129	1	0	0	0
FBgn0267260	lncRNA:CR45696	long non-coding RNA:CR45696	GAGA type 1	direct	TGAATTAAGGAGTTCTTTATCCTTA		0.000117488	21.3129	1	0	0	0
FBgn0267260	lncRNA:CR45696	long non-coding RNA:CR45696	GAGA type 2	direct	AAATGCAGCTGAGGGTGAGAGAGTTTTG		0.000117488	21.3129	1	0	0	0
FBgn0267260	lncRNA:CR45696	long non-coding RNA:CR45696	GAGA type 2	direct	CCAGAAACAAGAGCTGGAGCTGAGTTTA		0.000117488	21.3129	1	0	0	0
FBgn0266636	asRNA:CR45143	antisense RNA:CR45143	GAGA type 1	indirect	AAAGAGACAGAGAGAGAGAGGAAAA		0.0189324	20.618	1	0	0	0
FBgn0266636	asRNA:CR45143	antisense RNA:CR45143	GAGA type 1	indirect	ACCGACACAGAGAGAGGTAAGCGCA		0.0189324	20.618	1	0	0	0
FBgn0266636	asRNA:CR45143	antisense RNA:CR45143	GAGA type 1	direct	AGCTCAAGGGAGAGAGTTACACAAA		0.0189324	20.618	1	0	0	0
FBgn0266636	asRNA:CR45143	antisense RNA:CR45143	GAGA type 1	indirect	CGCGTCGCTGAGAGAGGGAGAAAAA		0.0189324	20.618	1	0	0	0
FBgn0266636	asRNA:CR45143	antisense RNA:CR45143	GAGA type 2	indirect	ACTTCTATGCGAGAGGGAGCACGAGAAA		0.0189324	20.618	1	0	0	0
FBgn0266636	asRNA:CR45143	antisense RNA:CR45143	GAGA type 2	indirect	ATGCGAGAGGGAGCACGAGAAAGAGACA		0.0189324	20.618	1	0	0	0
FBgn0266636	asRNA:CR45143	antisense RNA:CR45143	GAGA type 2	indirect	GAGGGAGCACGAGAAAGAGACAGAGAGA		0.0189324	20.618	1	0	0	0
FBgn0266636	asRNA:CR45143	antisense RNA:CR45143	GAGA type 2	indirect	GCACGAGAAAGAGACAGAGAGAGAGAGG		0.0189324	20.618	1	0	0	0
FBgn0266636	asRNA:CR45143	antisense RNA:CR45143	GAGA type 2	indirect	GAAAGAGACAGAGAGAGAGAGGAAAAGC		0.0189324	20.618	1	0	0	0
FBgn0266636	asRNA:CR45143	antisense RNA:CR45143	GAGA type 2	indirect	AAGAGACAGAGAGAGAGAGGAAAAGCGC		0.0189324	20.618	1	0	0	0
FBgn0266636	asRNA:CR45143	antisense RNA:CR45143	GAGA type 2	direct	TCGGTAGACAGAGAGCGAGAGAGCAGAC		0.0189324	20.618	1	0	0	0
FBgn0266636	asRNA:CR45143	antisense RNA:CR45143	GAGA type 2	direct	GGTAGACAGAGAGCGAGAGAGCAGACCA		0.0189324	20.618	1	0	0	0
FBgn0266636	asRNA:CR45143	antisense RNA:CR45143	GAGA type 2	direct	ACTCGGCGGAGAGAGTGAGACACAGAGA		0.0189324	20.618	1	0	0	0
FBgn0266636	asRNA:CR45143	antisense RNA:CR45143	GAGA type 2	indirect	GCGTCGCTGAGAGAGGGAGAAAAAAGTG		0.0189324	20.618	1	0	0	0
FBgn0266636	asRNA:CR45143	antisense RNA:CR45143	GAGA type 2	indirect	AGAGGAAGACGAGCAAGAGGAAGCTG		0.0189324	20.618	1	0	0	0
FBgn0262564	lncRNA:CR43104	long non-coding RNA:CR43104	GAGA type 1	direct	GATGGTCCAGAGCGAGGACTTAAAT		1.994e-18	20.2946	1	0	0	0
FBgn0262564	lncRNA:CR43104	long non-coding RNA:CR43104	GAGA type 1	indirect	CCTATACGCGAGTGAAAAGTTTTTA		1.994e-18	20.2946	1	0	0	0
FBgn0262564	lncRNA:CR43104	long non-coding RNA:CR43104	GAGA type 1	indirect	CCGCTGAGCGAGAGAGAAATTCAAT		1.994e-18	20.2946	1	0	0	0
FBgn0262564	lncRNA:CR43104	long non-coding RNA:CR43104	GAGA type 2	direct	GCGCAGCGGAGAGTAAGAGAAAAAGATG		1.994e-18	20.2946	1	0	0	0
FBgn0262564	lncRNA:CR43104	long non-coding RNA:CR43104	GAGA type 2	indirect	GTTTTCCGCTGAGCGAGAGAGAAATTCA		1.994e-18	20.2946	1	0	0	0
FBgn0265667	lncRNA:CR44474	long non-coding RNA:CR44474	GAGA type 1	direct	CTGAGATAAGAGATCTGGCCAAATG		8.34378e-06	20.2691	1	0	1	1
FBgn0266308	lncRNA:CR44973	long non-coding RNA:CR44973	GAGA type 1	direct	ATTAAACAAGAGAGAACGCTATTGT		1.0295e-13	19.912	0	0	0	0
FBgn0266738	lncRNA:CR45211	long non-coding RNA:CR45211	GAGA type 1	indirect	TTGATACGTGAGTGAAAATGAAGCC		1.5012e-11	19.782	1	0	0	0
FBgn0266738	lncRNA:CR45211	long non-coding RNA:CR45211	GAGA type 2	indirect	AAGCAACAGTGAGTTAGAACTTTTAT		1.5012e-11	19.782	1	0	0	0
FBgn0266594	lncRNA:CR45119	long non-coding RNA:CR45119	GAGA type 1	direct	TATTCTCTTGAGCTCCATAACATTT		0.00577652	19.136	1	0	0	0
FBgn0265694	lncRNA:CR44501	long non-coding RNA:CR44501	GAGA type 2	indirect	TTTTGGCTTTGAGTCTGAGTTCTGGGTA		1.72782e-17	18.907	1	0	0	0
FBgn0265694	lncRNA:CR44501	long non-coding RNA:CR44501	GAGA type 2	indirect	GAACAGGGAAGAGAAAGAGGAGTGCTCT		1.72782e-17	18.907	1	0	0	0
FBgn0266882	asRNA:CR45343	antisense RNA:CR45343	GAGA type 2	direct	TCAATTTGTTGCTTTAGAGCCCGAAGTT		3.49407e-12	18.6968	1	0	0	0
FBgn0266882	asRNA:CR45343	antisense RNA:CR45343	GAGA type 2	indirect	TATCCTCGATGAGAAGGAGCTGAATGAA		3.49407e-12	18.6968	1	0	0	0
FBgn0030356	lncRNA:CR32661	long non-coding RNA:CR32661	GAGA type 1	indirect	GCTCTGGACGAGCTCTGAAAGCAAA		7.84475e-162	18.608	0	1	0	0
FBgn0267563	lncRNA:CR45903	long non-coding RNA:CR45903	GAGA type 1	direct	AGGGGAGAGGAGAGAGTCTAGAATT		1.36548e-15	18.088	1	0	0	0
FBgn0267563	lncRNA:CR45903	long non-coding RNA:CR45903	GAGA type 1	indirect	CCATCCGATGAGTGATATTTTTAAG		1.36548e-15	18.088	1	0	0	0
FBgn0267563	lncRNA:CR45903	long non-coding RNA:CR45903	GAGA type 2	indirect	CTAAACAATGAAGTAAGAGTAAACAGTT		1.36548e-15	18.088	1	0	0	0
FBgn0265295	asRNA:CR42871	antisense RNA:CR42871	GAGA type 2	direct	AAATAAAATTGATTCAGAGCAGACACAC		0.0260703	17.9309	1	0	0	0
FBgn0265295	asRNA:CR42871	antisense RNA:CR42871	GAGA type 2	direct	AAGTTGTAAAGAGAGGGAGACGTGAATT		0.0260703	17.9309	1	0	0	0
FBgn0265295	asRNA:CR42871	antisense RNA:CR42871	GAGA type 2	indirect	CTGTGCGTGCGAGCGAGAGAAAAGAGCT		0.0260703	17.9309	1	0	0	0
FBgn0265788	lncRNA:CR44577	long non-coding RNA:CR44577	GAGA type 1	direct	TGAAAGTGCGAGTGAAAATGATTTG		6.39668e-21	17.6795	0	0	0	0
FBgn0267199	lncRNA:CR45639	long non-coding RNA:CR45639	GAGA type 2	indirect	AATATCGCCAGAGCCAGAGCCATAGCCA		1.98419e-07	17.292	1	0	0	0
FBgn0267199	lncRNA:CR45639	long non-coding RNA:CR45639	GAGA type 2	indirect	GACCGAAAACGAGAATGAGACCGGGACC		1.98419e-07	17.292	1	0	0	0
FBgn0267199	lncRNA:CR45639	long non-coding RNA:CR45639	GAGA type 2	indirect	GACCGGGACCGAGACCGAGAACCCAGAG		1.98419e-07	17.292	1	0	0	0
FBgn0265789	lncRNA:CR44578	long non-coding RNA:CR44578	GAGA type 1	indirect	CTTTAATCTGAGAGATGGCTATGGC		4.0616e-07	17.2777	1	0	0	0
FBgn0265789	lncRNA:CR44578	long non-coding RNA:CR44578	GAGA type 2	direct	GATAGTCAATGAGTTAGAATGTTCAATT		4.0616e-07	17.2777	1	0	0	0
FBgn0264514	lncRNA:CR43913	long non-coding RNA:CR43913	GAGA type 2	indirect	AATGCGTTTGGAGCTAGAGGAGCATTGA		3.46416e-12	17.1996	0	0	0	0
FBgn0264514	lncRNA:CR43913	long non-coding RNA:CR43913	GAGA type 2	indirect	TTTATCGGCCGAGTTGGAGACGACGCTG		3.46416e-12	17.1996	0	0	0	0
FBgn0264359	lncRNA:CR43811	long non-coding RNA:CR43811	GAGA type 1	direct	TCCGGCAAAGAGATCAAATCAAATC		1.99251e-18	17.1817	1	0	0	0
FBgn0266182	lncRNA:CR44888	long non-coding RNA:CR44888	GAGA type 2	indirect	CCTTTCAAATGAATCAGAGTTATGAATC		3.98281e-06	17.1289	1	0	1	1
FBgn0267666	lncRNA:CR46004	long non-coding RNA:CR46004	GAGA type 1	direct	GTCTCTGCGGAGAGAGAAATGATTG		0.0327643	16.8755	1	0	0	0
FBgn0266223	lncRNA:CR44918	long non-coding RNA:CR44918	GAGA type 1	direct	GATGAAGTTGAGATCGGATCAGATC		8.44743e-19	16.7651	1	0	0	0
FBgn0266223	lncRNA:CR44918	long non-coding RNA:CR44918	GAGA type 1	indirect	TGGATTTTTGAGTGATTAATTAAAA		8.44743e-19	16.7651	1	0	0	0
FBgn0266223	lncRNA:CR44918	long non-coding RNA:CR44918	GAGA type 2	indirect	AGCGGCAGCCGAGTGTGAGCGAGAGGGA		8.44743e-19	16.7651	1	0	0	0
FBgn0266223	lncRNA:CR44918	long non-coding RNA:CR44918	GAGA type 2	indirect	AGCCGAGTGTGAGCGAGAGGGAGAGGCG		8.44743e-19	16.7651	1	0	0	0
FBgn0266223	lncRNA:CR44918	long non-coding RNA:CR44918	GAGA type 2	indirect	GAGTGTGAGCGAGAGGGAGAGGCGCGAG		8.44743e-19	16.7651	1	0	0	0
FBgn0266223	lncRNA:CR44918	long non-coding RNA:CR44918	GAGA type 2	indirect	GTGTGAGCGAGAGGGAGAGGCGCGAGAC		8.44743e-19	16.7651	1	0	0	0
FBgn0266223	lncRNA:CR44918	long non-coding RNA:CR44918	GAGA type 2	indirect	TGCGCGAGTCTCTTTTGAGCGTTCGTTT		8.44743e-19	16.7651	1	0	0	0
FBgn0263090	lncRNA:CR43358	long non-coding RNA:CR43358	GAGA type 1	direct	TTTCAAGCAGAGAGGTATACTTTTT		8.02068e-05	16.6936	1	0	0	0
FBgn0267268	lncRNA:CR45704	long non-coding RNA:CR45704	GAGA type 2	indirect	TACGAACGTCGAGATCGAGAAAAGCAAA		0.00296478	16.5025	1	0	1	1
FBgn0264715	lncRNA:CR43983	long non-coding RNA:CR43983	GAGA type 2	indirect	AAGATGGAGGGAGATAGAGTGCCCAGAA		5.13625e-10	16.29	1	0	0	0
FBgn0266789	lncRNA:CR45254	long non-coding RNA:CR45254	GAGA type 2	direct	TGATGTAGATGAGGAGGAGATGACGACG		3.4696e-09	15.9833	0	0	0	0
FBgn0266826	lncRNA:CR45288	long non-coding RNA:CR45288	GAGA type 2	indirect	CAAACGTTATGAGTTTGAGTGTCAAATG		1.16107e-10	15.9019	1	0	0	0
FBgn0265673	lncRNA:CR44480	long non-coding RNA:CR44480	GAGA type 1	indirect	GGACCTCCAGAGAGACAGCTGAAGT		9.14803e-08	15.8723	1	0	0	0
FBgn0265673	lncRNA:CR44480	long non-coding RNA:CR44480	GAGA type 2	indirect	CAGCTGAAGTGAGCACTCGCAGAAAAAG		9.14803e-08	15.8723	1	0	0	0
FBgn0267154	lncRNA:CR45594	long non-coding RNA:CR45594	GAGA type 1	indirect	GTGATGACAGAGTGAGTTGTCCATT		8.80122e-10	15.3095	0	0	0	0
FBgn0264889	lncRNA:CR44080	long non-coding RNA:CR44080	GAGA type 1	indirect	ATGCCCAAGGAGCTTGGATGGAAAA		1.93149e-37	15.0761	1	0	0	0
FBgn0264889	lncRNA:CR44080	long non-coding RNA:CR44080	GAGA type 2	direct	TGGGGGATCTGAGTATGAGATATGAATA		1.93149e-37	15.0761	1	0	0	0
FBgn0264889	lncRNA:CR44080	long non-coding RNA:CR44080	GAGA type 2	indirect	GCTCCATTTCGAGCTGGAGTGCCAGAGC		1.93149e-37	15.0761	1	0	0	0
FBgn0264889	lncRNA:CR44080	long non-coding RNA:CR44080	GAGA type 2	indirect	AACGTTTGTTTCTTGAGAGCTGAAATCT		1.93149e-37	15.0761	1	0	0	0
FBgn0264889	lncRNA:CR44080	long non-coding RNA:CR44080	GAGA type 2	direct	TTAGCAGCCGGAGCAAGAGTCACAGTCG		1.93149e-37	15.0761	1	0	0	0
FBgn0264889	lncRNA:CR44080	long non-coding RNA:CR44080	GAGA type 2	direct	AGTGCAAAATGAACGAGAGCCTATGGTT		1.93149e-37	15.0761	1	0	0	0
FBgn0265787	lncRNA:CR44576	long non-coding RNA:CR44576	GAGA type 1	indirect	CGGCCAATCGAGAGACTTTAAAACT		5.46596e-08	15.051	1	0	0	0
FBgn0265787	lncRNA:CR44576	long non-coding RNA:CR44576	GAGA type 2	direct	TGAAACAAATGAGACAGAGAATTGCACT		5.46596e-08	15.051	1	0	0	0
FBgn0266378	lncRNA:CR45020	long non-coding RNA:CR45020	GAGA type 1	direct	ATTCATTCTGAGCTCCTTTTTTATG		4.66097e-26	14.9767	0	0	0	0
FBgn0266378	lncRNA:CR45020	long non-coding RNA:CR45020	GAGA type 1	indirect	ATAAAAAAGGAGCTCAGAATGAATG		4.66097e-26	14.9767	0	0	0	0
FBgn0264726	lncRNA:CR43994	long non-coding RNA:CR43994	GAGA type 2	direct	TGTGGCCCTTGAGAAAGAGTTTTTCCTG		4.35941e-07	14.5897	1	0	0	0
FBgn0264726	lncRNA:CR43994	long non-coding RNA:CR43994	GAGA type 2	indirect	CGACGATAGTGAGTCCTCTTGGATCCCC		4.35941e-07	14.5897	1	0	0	0
FBgn0263620	asRNA:CR43629	antisense RNA:CR43629	GAGA type 1	indirect	AAACGTGCAGAGAGAGAGAGAGAGC		7.4591e-12	14.2402	1	0	0	0
FBgn0263620	asRNA:CR43629	antisense RNA:CR43629	GAGA type 1	indirect	GCAGAGAGAGAGAGAGAGCAGCAGA		7.4591e-12	14.2402	1	0	0	0
FBgn0263620	asRNA:CR43629	antisense RNA:CR43629	GAGA type 2	indirect	TAAACGTGCAGAGAGAGAGAGAGAGCAG		7.4591e-12	14.2402	1	0	0	0
FBgn0263620	asRNA:CR43629	antisense RNA:CR43629	GAGA type 2	indirect	AACGTGCAGAGAGAGAGAGAGAGCAGCA		7.4591e-12	14.2402	1	0	0	0
FBgn0263620	asRNA:CR43629	antisense RNA:CR43629	GAGA type 2	indirect	CGTGCAGAGAGAGAGAGAGAGCAGCAGA		7.4591e-12	14.2402	1	0	0	0
FBgn0263620	asRNA:CR43629	antisense RNA:CR43629	GAGA type 2	indirect	TGCAGAGAGAGAGAGAGAGCAGCAGAGA		7.4591e-12	14.2402	1	0	0	0
FBgn0263620	asRNA:CR43629	antisense RNA:CR43629	GAGA type 2	direct	GAATAAGAAAGAGTGGGAGACAATGCTG		7.4591e-12	14.2402	1	0	0	0
FBgn0263620	asRNA:CR43629	antisense RNA:CR43629	GAGA type 2	direct	TGTTGGATGCGAGTGCGAGCGGAACGTC		7.4591e-12	14.2402	1	0	0	0
FBgn0263595	lncRNA:CR43617	long non-coding RNA:CR43617	GAGA type 1	indirect	TCGAAACCGGAGTGAATTTAACAAA		0.0067012	14.0237	0	0	0	0
FBgn0266652	lncRNA:CR45159	long non-coding RNA:CR45159	GAGA type 1	indirect	AACTTAAAGGAGAGATTAACTTCAT		0.00191354	14.0037	1	0	0	0
FBgn0266652	lncRNA:CR45159	long non-coding RNA:CR45159	GAGA type 2	direct	CACATCCACCGAGTCGGAGCGGATGCTC		0.00191354	14.0037	1	0	0	0
FBgn0266818	lncRNA:CR45280	long non-coding RNA:CR45280	GAGA type 1	indirect	AGTCTGAGCGAGAGAGAGAGGGAGA		6.37962e-14	13.8922	1	0	0	0
FBgn0266818	lncRNA:CR45280	long non-coding RNA:CR45280	GAGA type 1	indirect	CCTCTGATAGAGAGAGCGTTATCAA		6.37962e-14	13.8922	1	0	0	0
FBgn0266818	lncRNA:CR45280	long non-coding RNA:CR45280	GAGA type 2	indirect	CCCATTAAAAGAGTCTGAGCGAGAGAGA		6.37962e-14	13.8922	1	0	0	0
FBgn0266818	lncRNA:CR45280	long non-coding RNA:CR45280	GAGA type 2	indirect	AAAAGAGTCTGAGCGAGAGAGAGAGGGA		6.37962e-14	13.8922	1	0	0	0
FBgn0266818	lncRNA:CR45280	long non-coding RNA:CR45280	GAGA type 2	indirect	GAGTCTGAGCGAGAGAGAGAGGGAGAGC		6.37962e-14	13.8922	1	0	0	0
FBgn0266818	lncRNA:CR45280	long non-coding RNA:CR45280	GAGA type 2	indirect	GTCTGAGCGAGAGAGAGAGGGAGAGCCA		6.37962e-14	13.8922	1	0	0	0
FBgn0266818	lncRNA:CR45280	long non-coding RNA:CR45280	GAGA type 2	indirect	GAGCGAGAGAGAGAGGGAGAGCCAACCA		6.37962e-14	13.8922	1	0	0	0
FBgn0266818	lncRNA:CR45280	long non-coding RNA:CR45280	GAGA type 2	indirect	GCGAGAGAGAGAGGGAGAGCCAACCAGC		6.37962e-14	13.8922	1	0	0	0
FBgn0265982	lncRNA:CR44761	long non-coding RNA:CR44761	GAGA type 1	indirect	TGGTCGAAGGAGCGAGAAAAAAATA		8.00184e-14	13.6179	1	0	0	0
FBgn0265982	lncRNA:CR44761	long non-coding RNA:CR44761	GAGA type 2	indirect	TTTTCGCACAGAGCCGGAGCACATCGCA		8.00184e-14	13.6179	1	0	0	0
FBgn0265904	lncRNA:CR44693	long non-coding RNA:CR44693	GAGA type 1	direct	AAGCTACAGGAGAGATAAGATCGAT		0.00104416	13.6159	0	0	1	1
FBgn0265904	lncRNA:CR44693	long non-coding RNA:CR44693	GAGA type 1	indirect	AGGACAACGGAGAGAAAACCACAAA		0.00104416	13.6159	0	0	1	1
FBgn0263412	lncRNA:CR43458	long non-coding RNA:CR43458	GAGA type 1	indirect	AAACAGCACGAGTGATTTTTCTTAT		0.000215331	12.8599	1	0	1	1
FBgn0263412	lncRNA:CR43458	long non-coding RNA:CR43458	GAGA type 1	direct	GCAACAATTGAGAGATGTCATGATA		0.000215331	12.8599	1	0	1	1
FBgn0266096	lncRNA:CR44833	long non-coding RNA:CR44833	GAGA type 1	indirect	AGAATATCCGAGAGAGGGCGCTTTC		4.63706e-07	12.7544	1	0	0	0
FBgn0266096	lncRNA:CR44833	long non-coding RNA:CR44833	GAGA type 1	direct	ACCGAAAATGAGAGAAGCAAAGAAG		4.63706e-07	12.7544	1	0	0	0
FBgn0266096	lncRNA:CR44833	long non-coding RNA:CR44833	GAGA type 1	indirect	GCAGAGCGGGAGAGAGAGAAGTCCG		4.63706e-07	12.7544	1	0	0	0
FBgn0266096	lncRNA:CR44833	long non-coding RNA:CR44833	GAGA type 2	indirect	TTTAGTGTACTCTTTTGAGATAATTTCA		4.63706e-07	12.7544	1	0	0	0
FBgn0266096	lncRNA:CR44833	long non-coding RNA:CR44833	GAGA type 2	indirect	AGCAGAGGACGAGGAGGAGCAAGAAGAC		4.63706e-07	12.7544	1	0	0	0
FBgn0266096	lncRNA:CR44833	long non-coding RNA:CR44833	GAGA type 2	indirect	GAAGCCCGCAGAGCGGGAGAGAGAGAAG		4.63706e-07	12.7544	1	0	0	0
FBgn0266096	lncRNA:CR44833	long non-coding RNA:CR44833	GAGA type 2	indirect	CGCAGAGCGGGAGAGAGAGAAGTCCGAT		4.63706e-07	12.7544	1	0	0	0
FBgn0264336	lncRNA:CR43792	long non-coding RNA:CR43792	GAGA type 1	direct	GGCGACTCGGAGCGAAATAGGGAGG		8.15027e-16	12.2677	1	0	0	0
FBgn0264573	lncRNA:CR43945	long non-coding RNA:CR43945	GAGA type 1	direct	CGGTTTTGGGAGAGAGAATGGAGCG		3.43814e-05	12.2281	1	0	0	0
FBgn0264573	lncRNA:CR43945	long non-coding RNA:CR43945	GAGA type 1	indirect	CAAGTGCATGAGTGAGTATATATTT		3.43814e-05	12.2281	1	0	0	0
FBgn0264573	lncRNA:CR43945	long non-coding RNA:CR43945	GAGA type 1	indirect	AACAGCTTTGAGAGAGAGAGAAAGC		3.43814e-05	12.2281	1	0	0	0
FBgn0264573	lncRNA:CR43945	long non-coding RNA:CR43945	GAGA type 1	indirect	GCTTTGAGAGAGAGAGAAAGCTTCT		3.43814e-05	12.2281	1	0	0	0
FBgn0264573	lncRNA:CR43945	long non-coding RNA:CR43945	GAGA type 1	indirect	TTTGAGAGAGAGAGAAAGCTTCTTA		3.43814e-05	12.2281	1	0	0	0
FBgn0264573	lncRNA:CR43945	long non-coding RNA:CR43945	GAGA type 1	indirect	CCCCCTTAAGAGAGAGTGCCCAAGC		3.43814e-05	12.2281	1	0	0	0
FBgn0264573	lncRNA:CR43945	long non-coding RNA:CR43945	GAGA type 2	indirect	AAACAGCTTTGAGAGAGAGAGAAAGCTT		3.43814e-05	12.2281	1	0	0	0
FBgn0264573	lncRNA:CR43945	long non-coding RNA:CR43945	GAGA type 2	indirect	ACAGCTTTGAGAGAGAGAGAAAGCTTCT		3.43814e-05	12.2281	1	0	0	0
FBgn0264573	lncRNA:CR43945	long non-coding RNA:CR43945	GAGA type 2	indirect	CGGGCCAAAAGAGAGCGAGCTTTTTCTT		3.43814e-05	12.2281	1	0	0	0
FBgn0265672	lncRNA:CR44479	long non-coding RNA:CR44479	GAGA type 2	indirect	ACTGCAGACAGAGTCCTCTTTATGTGTT		4.37984e-10	11.9737	1	0	0	0
FBgn0267307	lncRNA:CR45743	long non-coding RNA:CR45743	GAGA type 1	direct	CGCCCCGCTGAGCTCTTTTGTTAAT		2.53185e-06	11.8077	1	0	0	0
FBgn0264857	lncRNA:iab8	long non-coding RNA:iab8	GAGA type 1	indirect	GAGAATGCCGAGCGAAGACCCAATG		1.88528e-22	11.6774	1	1	0	0
FBgn0264857	lncRNA:iab8	long non-coding RNA:iab8	GAGA type 2	indirect	CCAAGGAAATGAGAATGAGAATGCCGAG		1.88528e-22	11.6774	1	1	0	0
FBgn0264857	lncRNA:iab8	long non-coding RNA:iab8	GAGA type 2	indirect	ACCGAGTTTTGAGCCAGAGGCTGACGAC		1.88528e-22	11.6774	1	1	0	0
FBgn0265932	lncRNA:CR44721	long non-coding RNA:CR44721	GAGA type 2	indirect	GTTGGAGCATGAGGAAGAGGAAGCGGTC		0.0456571	11.6384	0	0	0	0
FBgn0265932	lncRNA:CR44721	long non-coding RNA:CR44721	GAGA type 2	indirect	GAAGCGGTCAGAGGCAGAGCAGGGTTGT		0.0456571	11.6384	0	0	0	0
FBgn0267452	asRNA:CR45802	antisense RNA:CR45802	GAGA type 2	indirect	GATTGACTTTGAGATTGAGGCTGGCTGC		0.000141922	11.6355	1	0	0	0
FBgn0264863	asRNA:CR44054	antisense RNA:CR44054	GAGA type 2	direct	GCGCCAATGAGAGGAGGAGTCGCTGGCG		0.00157421	11.3792	0	0	0	0
FBgn0266951	lncRNA:CR45402	long non-coding RNA:CR45402	GAGA type 1	indirect	TACAATAAAGAGTGGAAATTAAAAA		8.45866e-09	11.2278	1	0	0	0
FBgn0263095	lncRNA:CR43363	long non-coding RNA:CR43363	GAGA type 2	indirect	ATATATAGGGGAGCAAGAGTCAGTGGAG		2.07738e-31	11.1456	1	0	0	0
FBgn0267316	lncRNA:CR45752	long non-coding RNA:CR45752	GAGA type 1	indirect	TAATGATTGGAGCGATACGAGTGTG		0.012074	11.0911	0	0	1	1
FBgn0266207	lncRNA:CR44902	long non-coding RNA:CR44902	GAGA type 1	direct	GCTTGGCATGAGCGGTAATAAAAAC		3.57692e-06	10.7196	1	0	0	0
FBgn0266207	lncRNA:CR44902	long non-coding RNA:CR44902	GAGA type 1	indirect	TTTTTATATGAGCTCATTATCTGTG		3.57692e-06	10.7196	1	0	0	0
FBgn0266207	lncRNA:CR44902	long non-coding RNA:CR44902	GAGA type 1	direct	ACAGATAATGAGCTCATATAAAAAC		3.57692e-06	10.7196	1	0	0	0
FBgn0266207	lncRNA:CR44902	long non-coding RNA:CR44902	GAGA type 1	indirect	ATTTTTCTTGAGTGACCGTCGCACA		3.57692e-06	10.7196	1	0	0	0
FBgn0267267	lncRNA:CR45703	long non-coding RNA:CR45703	GAGA type 1	indirect	CATATATGTGAGTGATATATAAACA		0.0120951	10.2685	1	0	1	1
FBgn0267267	lncRNA:CR45703	long non-coding RNA:CR45703	GAGA type 2	direct	TACGAACGTCGAGATCGAGAAAAGCAAA		0.0120951	10.2685	1	0	1	1
FBgn0265069	lncRNA:CR44180	long non-coding RNA:CR44180	GAGA type 1	direct	AGGAAAATGGAGAGATAGAGAAATT		1.19666e-32	9.85885	1	0	0	0
FBgn0265069	lncRNA:CR44180	long non-coding RNA:CR44180	GAGA type 2	direct	GGAAAATGGAGAGATAGAGAAATTACTT		1.19666e-32	9.85885	1	0	0	0
FBgn0265910	lncRNA:CR44699	long non-coding RNA:CR44699	GAGA type 1	direct	GCTCCAGCGGAGTGAGAATTGCCGG		0.00722311	9.81567	0	0	0	0
FBgn0267752	lncRNA:CR46083	long non-coding RNA:CR46083	GAGA type 1	direct	CCTTTCTCTGAGTTCCTTACCTTTG		2.17939e-06	9.76449	0	0	0	0
FBgn0266408	lncRNA:CR45048	long non-coding RNA:CR45048	GAGA type 1	direct	ACTATGTAGGAGATCTCGCGGTTTG		5.39638e-20	9.41444	1	0	0	0
FBgn0266408	lncRNA:CR45048	long non-coding RNA:CR45048	GAGA type 2	indirect	AGCCTTTGTAGAGCAGGAGAATTGCATG		5.39638e-20	9.41444	1	0	0	0
FBgn0266408	lncRNA:CR45048	long non-coding RNA:CR45048	GAGA type 2	indirect	CCAGCAGGAGGAGTGCGAGCTGAAGCTG		5.39638e-20	9.41444	1	0	0	0
FBgn0266408	lncRNA:CR45048	long non-coding RNA:CR45048	GAGA type 2	indirect	GATTGCCAAAGAGGACGAGATCGTTAGC		5.39638e-20	9.41444	1	0	0	0
FBgn0266407	lncRNA:CR45047	long non-coding RNA:CR45047	GAGA type 1	direct	AAAAAATTCGAGAGACGCTTCAACT		2.13665e-05	9.04658	1	0	0	0
FBgn0267918	lncRNA:CR46199	long non-coding RNA:CR46199	GAGA type 1	indirect	CCAAAATGAGAGTGAGATGTGGAAG		0.0144321	8.88566	1	0	0	0
FBgn0267918	lncRNA:CR46199	long non-coding RNA:CR46199	GAGA type 2	indirect	AAGCCAAAATGAGAGTGAGATGTGGAAG		0.0144321	8.88566	1	0	0	0
FBgn0267987	lncRNA:CR46254	long non-coding RNA:CR46254	GAGA type 1	indirect	TAAGAACAAGAGAGAACGCGATAAT		5.96535e-15	8.76892	0	0	0	0
FBgn0267114	lncRNA:CR45554	long non-coding RNA:CR45554	GAGA type 1	indirect	ATGCTGCTCGAGTGAAAAGCGTTCG		0.0109192	8.61488	1	0	0	0
FBgn0267114	lncRNA:CR45554	long non-coding RNA:CR45554	GAGA type 1	direct	TGAGGCACTGAGAGATTGAACAAAT		0.0109192	8.61488	1	0	0	0
FBgn0266217	lncRNA:CR44912	long non-coding RNA:CR44912	GAGA type 1	indirect	TGGCGCTTTGAGCGACTTAAGCAAC		4.33499e-05	8.45457	1	0	0	0
FBgn0266217	lncRNA:CR44912	long non-coding RNA:CR44912	GAGA type 1	direct	CTGGCTGACGAGCGATCGCGGAAAC		4.33499e-05	8.45457	1	0	0	0
FBgn0266217	lncRNA:CR44912	long non-coding RNA:CR44912	GAGA type 1	indirect	CACTACTACGAGCTCAAAACTAACT		4.33499e-05	8.45457	1	0	0	0
FBgn0266217	lncRNA:CR44912	long non-coding RNA:CR44912	GAGA type 2	direct	TCGCGGAAACGAGAACGAGAAACGACGG		4.33499e-05	8.45457	1	0	0	0
FBgn0267656	lncRNA:CR45994	long non-coding RNA:CR45994	GAGA type 2	direct	GTATTTAATAGAGAATGAGGCATGCTAA		0.0199172	8.40108	0	0	0	0
FBgn0266687	lncRNA:CR45177	long non-coding RNA:CR45177	GAGA type 1	indirect	GTCGGCTGGGAGAGAGGTGTGCACA		9.16911e-06	8.06323	1	0	0	0
FBgn0266687	lncRNA:CR45177	long non-coding RNA:CR45177	GAGA type 2	direct	GCCGAAGAGTGAGCGTGAGGACGATGAA		9.16911e-06	8.06323	1	0	0	0
FBgn0267198	lncRNA:CR45638	long non-coding RNA:CR45638	GAGA type 2	indirect	GACCGAAAACGAGAATGAGACCGGGACC		0.0038481	7.52062	1	0	0	0
FBgn0267198	lncRNA:CR45638	long non-coding RNA:CR45638	GAGA type 2	indirect	GACCGGGACCGAGACCGAGAACCCAGAG		0.0038481	7.52062	1	0	0	0
FBgn0267668	lncRNA:CR46006	long non-coding RNA:CR46006	GAGA type 1	indirect	GGGTTGAACGAGAGAGTTTTGTTTT		4.926e-08	7.24464	1	0	0	0
FBgn0267668	lncRNA:CR46006	long non-coding RNA:CR46006	GAGA type 2	direct	TAACCATCATGAGTGCTCTTCAGGCCAT		4.926e-08	7.24464	1	0	0	0
FBgn0267668	lncRNA:CR46006	long non-coding RNA:CR46006	GAGA type 2	direct	AAGGACTCGCGAGTCCGAGTCCTGTTTC		4.926e-08	7.24464	1	0	0	0
FBgn0266884	lncRNA:CR45345	long non-coding RNA:CR45345	GAGA type 2	indirect	AGCAGCAGAGGAGTGGGAGCGGGAGCGG		1.18182e-10	7.0239	1	0	0	0
FBgn0266884	lncRNA:CR45345	long non-coding RNA:CR45345	GAGA type 2	indirect	AGAGGAGTGGGAGCGGGAGCGGGAGAGC		1.18182e-10	7.0239	1	0	0	0
FBgn0266884	lncRNA:CR45345	long non-coding RNA:CR45345	GAGA type 2	indirect	GTGGGAGCGGGAGCGGGAGAGCCGAAAA		1.18182e-10	7.0239	1	0	0	0
FBgn0266884	lncRNA:CR45345	long non-coding RNA:CR45345	GAGA type 2	indirect	GCGCACAGGTGAGGGCTCTCGCCCGCTC		1.18182e-10	7.0239	1	0	0	0
FBgn0266884	lncRNA:CR45345	long non-coding RNA:CR45345	GAGA type 2	indirect	ATGTTCGCACGAGACGGAGTGTCATTAA		1.18182e-10	7.0239	1	0	0	0
FBgn0266819	asRNA:CR45281	antisense RNA:CR45281	GAGA type 1	indirect	ATAGCGCTTGAGAGAGGAAAATATG		5.34006e-17	6.87863	1	0	0	0
FBgn0266819	asRNA:CR45281	antisense RNA:CR45281	GAGA type 1	direct	GCGCCGTGCGAGAGAGACGGATATG		5.34006e-17	6.87863	1	0	0	0
FBgn0266763	lncRNA:CR45228	long non-coding RNA:CR45228	GAGA type 1	direct	TATAGAGTTGAGTTCCAAATTTTTT		0.00254868	6.75494	0	0	0	0
FBgn0264727	lncRNA:CR43995	long non-coding RNA:CR43995	GAGA type 1	indirect	CGATTGAATGAGAGAGATTGAGACA		0.0436213	6.6577	0	0	0	0
FBgn0264727	lncRNA:CR43995	long non-coding RNA:CR43995	GAGA type 2	indirect	ACAACCGATTGAATGAGAGAGATTGAGA		0.0436213	6.6577	0	0	0	0
FBgn0264727	lncRNA:CR43995	long non-coding RNA:CR43995	GAGA type 2	indirect	TTGAATGAGAGAGATTGAGACATCAACG		0.0436213	6.6577	0	0	0	0
FBgn0264727	lncRNA:CR43995	long non-coding RNA:CR43995	GAGA type 2	indirect	AGATATTGGTGAGTCCGAGATTCAGATG		0.0436213	6.6577	0	0	0	0
FBgn0264674	asRNA:CR43959	antisense RNA:CR43959	GAGA type 1	direct	GAATAGAAAGAGAGAGAGAGAGAGA		0.00776166	6.65745	0	0	0	0
FBgn0264674	asRNA:CR43959	antisense RNA:CR43959	GAGA type 1	direct	ATAGAAAGAGAGAGAGAGAGAGAGA		0.00776166	6.65745	0	0	0	0
FBgn0264674	asRNA:CR43959	antisense RNA:CR43959	GAGA type 1	direct	AGAAAGAGAGAGAGAGAGAGAGAGA		0.00776166	6.65745	0	0	0	0
FBgn0264674	asRNA:CR43959	antisense RNA:CR43959	GAGA type 1	direct	AAAGAGAGAGAGAGAGAGAGAGAGA		0.00776166	6.65745	0	0	0	0
FBgn0264674	asRNA:CR43959	antisense RNA:CR43959	GAGA type 1	direct	AGAGAGAGAGAGAGAGAGAGAGACG		0.00776166	6.65745	0	0	0	0
FBgn0264674	asRNA:CR43959	antisense RNA:CR43959	GAGA type 1	direct	AGAGAGAGAGAGAGAGACGGGGGAG		0.00776166	6.65745	0	0	0	0
FBgn0264674	asRNA:CR43959	antisense RNA:CR43959	GAGA type 2	direct	AGAATAGAAAGAGAGAGAGAGAGAGAGA		0.00776166	6.65745	0	0	0	0
FBgn0264674	asRNA:CR43959	antisense RNA:CR43959	GAGA type 2	direct	AATAGAAAGAGAGAGAGAGAGAGAGAGA		0.00776166	6.65745	0	0	0	0
FBgn0264674	asRNA:CR43959	antisense RNA:CR43959	GAGA type 2	direct	TAGAAAGAGAGAGAGAGAGAGAGAGAGA		0.00776166	6.65745	0	0	0	0
FBgn0264674	asRNA:CR43959	antisense RNA:CR43959	GAGA type 2	direct	GAAAGAGAGAGAGAGAGAGAGAGAGACG		0.00776166	6.65745	0	0	0	0
FBgn0264674	asRNA:CR43959	antisense RNA:CR43959	GAGA type 2	direct	AAGAGAGAGAGAGAGAGAGAGAGACGGG		0.00776166	6.65745	0	0	0	0
FBgn0264674	asRNA:CR43959	antisense RNA:CR43959	GAGA type 2	direct	GAGAGAGAGAGAGAGAGAGAGACGGGGG		0.00776166	6.65745	0	0	0	0
FBgn0264674	asRNA:CR43959	antisense RNA:CR43959	GAGA type 2	direct	GAGAGAGAGAGAGAGAGAGACGGGGGAG		0.00776166	6.65745	0	0	0	0
FBgn0264674	asRNA:CR43959	antisense RNA:CR43959	GAGA type 2	indirect	GTGTGTATAAGAGTGCGAGCTGTAGATG		0.00776166	6.65745	0	0	0	0
FBgn0263333	lncRNA:CR43414	long non-coding RNA:CR43414	GAGA type 2	direct	GCCTTCTTCCGAGTTTGAGTCTGCGGGT		1.94898e-50	6.35072	1	1	0	0
FBgn0263333	lncRNA:CR43414	long non-coding RNA:CR43414	GAGA type 2	direct	GACCACCTGCGAGTTGGAGTCGGTCGGC		1.94898e-50	6.35072	1	1	0	0
FBgn0263333	lncRNA:CR43414	long non-coding RNA:CR43414	GAGA type 2	direct	AAAAAAGCTAGAGCTTGAGTGCTTAATA		1.94898e-50	6.35072	1	1	0	0
FBgn0267703	lncRNA:CR46036	long non-coding RNA:CR46036	GAGA type 1	indirect	TTTGCTGTAGAGAGATTTTAATATT		0.00416643	6.25633	1	0	0	0
FBgn0267703	lncRNA:CR46036	long non-coding RNA:CR46036	GAGA type 2	indirect	TGCTCCCACTGAGCTCTCTCCGCTGGGG		0.00416643	6.25633	1	0	0	0
FBgn0261813	lncRNA:CR42755	long non-coding RNA:CR42755	GAGA type 1	indirect	TGAAATCAAGAGTGATATAAAGAGC		0.00031972	6.02365	0	0	0	0
FBgn0052636	lncRNA:CR32636	long non-coding RNA:CR32636	GAGA type 1	direct	AGAAATGACGAGTGACTTGTGCACA		0.000924395	6.01739	1	0	0	0
FBgn0052636	lncRNA:CR32636	long non-coding RNA:CR32636	GAGA type 2	direct	CGCTCCTGGCGAGTGGGAGTGGATTCGA		0.000924395	6.01739	1	0	0	0
FBgn0262943	lncRNA:CR43262	long non-coding RNA:CR43262	GAGA type 1	direct	CGGAAAGGGGAGAGGAAATGAGATT		9.56026e-08	5.90916	1	0	0	0
FBgn0265937	asRNA:CR44724	antisense RNA:CR44724	GAGA type 1	indirect	TCCGGGTGGGAGTGAGGTGTGTTCC		2.8408e-10	5.88585	0	0	0	0
FBgn0265666	lncRNA:CR44473	long non-coding RNA:CR44473	GAGA type 1	indirect	AGCTATGGAGAGAGAGGGGTGGAAG		0.0272215	5.86902	0	0	1	1
FBgn0265666	lncRNA:CR44473	long non-coding RNA:CR44473	GAGA type 2	indirect	GAGAGCTATGGAGAGAGAGGGGTGGAAG		0.0272215	5.86902	0	0	1	1
FBgn0267702	lncRNA:CR46035	long non-coding RNA:CR46035	GAGA type 1	direct	AAATTTTATGAGCGAATCGAAAGTT		3.36768e-07	5.39151	1	0	0	0
FBgn0267702	lncRNA:CR46035	long non-coding RNA:CR46035	GAGA type 1	indirect	ATGTCTAATGAGCGACAGTCGGACT		3.36768e-07	5.39151	1	0	0	0
FBgn0267702	lncRNA:CR46035	long non-coding RNA:CR46035	GAGA type 2	indirect	TACTGGGACTGAGACTGAGACTATGCGG		3.36768e-07	5.39151	1	0	0	0
FBgn0266812	lncRNA:CR45274	long non-coding RNA:CR45274	GAGA type 1	direct	GATCTCCTTGAGCTCGTCATCGATA		0.000402872	5.18433	0	0	0	0
FBgn0259112	asRNA:CR42254	antisense RNA:CR42254	GAGA type 1	direct	GTCCTTGGTGAGCTCCTCGTGATTC		2.34754e-17	5.10161	0	0	0	0
FBgn0259112	asRNA:CR42254	antisense RNA:CR42254	GAGA type 2	indirect	AAAGTGGGAGGAGTACGAGCAGAACGAT		2.34754e-17	5.10161	0	0	0	0
FBgn0267661	asRNA:CR45999	antisense RNA:CR45999	GAGA type 1	indirect	AAGTGCGATGAGTGATCACGATTCC		0.0447634	5.09452	1	0	0	0
FBgn0287621	lncRNA:CR46490	long non-coding RNA:CR46490	GAGA type 1	indirect	CCTAGCAACGAGAGGTTTACTTTAA		0.0129043	4.92682	1	0	0	0
FBgn0266158	lncRNA:CR44864	long non-coding RNA:CR44864	GAGA type 1	indirect	AGGAGCGAAGAGTGGCTCGAAAACA		2.81141e-13	4.82524	0	0	0	0
FBgn0266158	lncRNA:CR44864	long non-coding RNA:CR44864	GAGA type 1	indirect	TTTGACCCAGAGAGAAAATGGAAAT		2.81141e-13	4.82524	0	0	0	0
FBgn0264840	lncRNA:CR44048	long non-coding RNA:CR44048	GAGA type 2	direct	GGATGCGTGTGAGTGTGAGTGTAAGAGT		9.15533e-25	4.79882	0	0	0	0
FBgn0264840	lncRNA:CR44048	long non-coding RNA:CR44048	GAGA type 2	direct	CAGACTCGAGGAGCCTGAGCTTGGGAGG		9.15533e-25	4.79882	0	0	0	0
FBgn0264618	lncRNA:CR43958	long non-coding RNA:CR43958	GAGA type 1	direct	AATTTCTCGGAGCTCCGTTGCGAGC		0.0451453	4.74037	1	0	0	0
FBgn0267644	lncRNA:CR45982	long non-coding RNA:CR45982	GAGA type 2	indirect	CTGAAAGTCTGAAAAAGAGAGCAACTTT		3.5485e-41	4.70454	0	0	0	0
FBgn0264887	lncRNA:CR44078	long non-coding RNA:CR44078	GAGA type 2	direct	CTATCGACTCGAGTACTCGATTTGAAAA		0.00209128	4.60606	0	0	0	0
FBgn0264887	lncRNA:CR44078	long non-coding RNA:CR44078	GAGA type 2	indirect	TTTTCAAATCGAGTACTCGAGTCGATAG		0.00209128	4.60606	0	0	0	0
FBgn0263870	lncRNA:CR43717	long non-coding RNA:CR43717	GAGA type 1	direct	ACAAGAAAGGAGAGAGGAATTTGAT		0.000138652	4.5949	1	0	0	0
FBgn0263870	lncRNA:CR43717	long non-coding RNA:CR43717	GAGA type 2	direct	GCCAAGAGTCGAGTTCGAGAGGTTTACA		0.000138652	4.5949	1	0	0	0
FBgn0263870	lncRNA:CR43717	long non-coding RNA:CR43717	GAGA type 2	direct	CAGAGCTCCGGAGTCTGAGCTGAAACCT		0.000138652	4.5949	1	0	0	0
FBgn0266033	lncRNA:CR44798	long non-coding RNA:CR44798	GAGA type 1	indirect	CGGCTTGTGTCTCTCCAATGCAATA		0.0346929	4.5918	1	0	1	1
FBgn0267127	lncRNA:CR45567	long non-coding RNA:CR45567	GAGA type 1	indirect	CGTTTGTGCGAGAGATATTCGAGTT		0.00321911	4.50988	0	0	0	0
FBgn0267127	lncRNA:CR45567	long non-coding RNA:CR45567	GAGA type 2	indirect	CACTGCACT		0.00321911	4.50988	0	0	0	0
FBgn0286033	lncRNA:CR46353	long non-coding RNA:CR46353	GAGA type 2	indirect	TTCGAAAAAAGAGGCCGAGACTCGGAAG		2.16807e-05	4.22284	1	0	0	0
FBgn0286033	lncRNA:CR46353	long non-coding RNA:CR46353	GAGA type 2	direct	ATTTCATTTCGAGAACGAGACCGAAAAA		2.16807e-05	4.22284	1	0	0	0
FBgn0267235	lncRNA:CR45675	long non-coding RNA:CR45675	GAGA type 1	direct	CAGATCGCAGAGAGATACCCGGATA		3.40392e-07	4.12072	1	0	0	0
FBgn0267235	lncRNA:CR45675	long non-coding RNA:CR45675	GAGA type 1	indirect	CTCTGGTGGGAGAGATGTGACTATG		3.40392e-07	4.12072	1	0	0	0
FBgn0267235	lncRNA:CR45675	long non-coding RNA:CR45675	GAGA type 1	indirect	AAAATTCCAGAGATCCAATTCAAGG		3.40392e-07	4.12072	1	0	0	0
FBgn0265548	lncRNA:CR44398	long non-coding RNA:CR44398	GAGA type 2	direct	GGTGGACGTAGAGTGCGAGTGGCGGGCT		2.39701e-16	3.83479	1	0	0	0
FBgn0264358	lncRNA:CR43810	long non-coding RNA:CR43810	GAGA type 1	indirect	GATTCCACCGAGCTCCTTGTTTCAG		3.31535e-15	3.73065	1	0	0	0
FBgn0264358	lncRNA:CR43810	long non-coding RNA:CR43810	GAGA type 2	indirect	ATTTAAAATTGAACAAGAGCCGGGAAGC		3.31535e-15	3.73065	1	0	0	0
FBgn0267181	asRNA:CR45621	antisense RNA:CR45621	GAGA type 1	indirect	CTGGGCGAAGAGAGAGACAGCAAGC		0.0405104	3.72068	1	0	0	0
FBgn0267181	asRNA:CR45621	antisense RNA:CR45621	GAGA type 1	indirect	GGGCGAAGAGAGAGACAGCAAGCTG		0.0405104	3.72068	1	0	0	0
FBgn0267181	asRNA:CR45621	antisense RNA:CR45621	GAGA type 1	indirect	CAAAATGCAGAGCTCAAAATCTTTT		0.0405104	3.72068	1	0	0	0
FBgn0265680	lncRNA:CR44487	long non-coding RNA:CR44487	GAGA type 1	direct	ACTCGACTGGAGTGAAAAACTGAAA		2.11439e-05	3.71713	1	0	0	0
FBgn0265657	lncRNA:CR44464	long non-coding RNA:CR44464	GAGA type 2	direct	ATAGTGGACAGAGGGTGAGTCGATGGTG		0.0170956	3.70976	0	0	1	1
FBgn0263381	asRNA:CR43433	antisense RNA:CR43433	GAGA type 1	indirect	ATGCACTGCGAGTGAAACGTGTAAT		2.92286e-12	3.67609	0	0	0	0
FBgn0267246	asRNA:CR45686	antisense RNA:CR45686	GAGA type 1	direct	GGCGGCATCGAGCGAATCGAACATG		3.18274e-10	3.67301	1	0	0	0
FBgn0264352	lncRNA:CR43808	long non-coding RNA:CR43808	GAGA type 1	indirect	ATATTGGGCGAGAGAGAAATTTGGA		0.048436	3.64695	1	0	0	0
FBgn0264352	lncRNA:CR43808	long non-coding RNA:CR43808	GAGA type 1	indirect	ATTGGGCGAGAGAGAAATTTGGAAA		0.048436	3.64695	1	0	0	0
FBgn0264352	lncRNA:CR43808	long non-coding RNA:CR43808	GAGA type 2	direct	ATATTCGCATGAGTGTGAGATTCTTTAT		0.048436	3.64695	1	0	0	0
FBgn0267561	lncRNA:CR45901	long non-coding RNA:CR45901	GAGA type 1	indirect	AATGAAAATGAGCGAGAACTCCAGA		0.000766431	3.62898	1	0	0	0
FBgn0267561	lncRNA:CR45901	long non-coding RNA:CR45901	GAGA type 1	indirect	TTCTGGCGGGAGAGAACTCTTTAAA		0.000766431	3.62898	1	0	0	0
FBgn0267561	lncRNA:CR45901	long non-coding RNA:CR45901	GAGA type 2	direct	CTGATTTAAAGAGTTCTCTCCCGCCAGA		0.000766431	3.62898	1	0	0	0
FBgn0267561	lncRNA:CR45901	long non-coding RNA:CR45901	GAGA type 2	direct	CTGTGTTTTCGAGTGCTCTCCCCCCGTG		0.000766431	3.62898	1	0	0	0
FBgn0267561	lncRNA:CR45901	long non-coding RNA:CR45901	GAGA type 2	indirect	AAATGAAAATGAGCGAGAACTCCAGAAG		0.000766431	3.62898	1	0	0	0
FBgn0267561	lncRNA:CR45901	long non-coding RNA:CR45901	GAGA type 2	direct	ATTTGCATTTGAGTTTGAGGTATTGCCC		0.000766431	3.62898	1	0	0	0
FBgn0267561	lncRNA:CR45901	long non-coding RNA:CR45901	GAGA type 2	indirect	TCTGGCGGGAGAGAACTCTTTAAATCAG		0.000766431	3.62898	1	0	0	0
FBgn0267438	lncRNA:CR45788	long non-coding RNA:CR45788	GAGA type 2	direct	ACAGATAAAGGAGTCGGAGTAAAAAATC		2.72711e-05	3.62735	0	0	0	0
FBgn0266958	lncRNA:CR45409	long non-coding RNA:CR45409	GAGA type 2	direct	CCGCGACCGCGAGCGGGAGCGTGATCGC		0.00477907	3.56657	0	0	0	0
FBgn0267139	lncRNA:CR45579	long non-coding RNA:CR45579	GAGA type 2	indirect	AAGAGGCAAGGAGCCTGAGACAACAGGC		2.3368e-08	3.54201	1	0	0	0
FBgn0265060	lncRNA:CR44171	long non-coding RNA:CR44171	GAGA type 1	direct	GCGGAGTTGGAGTGAGAACTATTAA		7.00933e-10	3.52997	1	0	0	0
FBgn0265060	lncRNA:CR44171	long non-coding RNA:CR44171	GAGA type 1	indirect	TCAGCATCCGAGTGAGTCTAGAACT		7.00933e-10	3.52997	1	0	0	0
FBgn0265060	lncRNA:CR44171	long non-coding RNA:CR44171	GAGA type 2	direct	CTAACCAGGTGAGTTCTAGACTCACTCG		7.00933e-10	3.52997	1	0	0	0
FBgn0265060	lncRNA:CR44171	long non-coding RNA:CR44171	GAGA type 2	direct	GGCAAGAGCGGAGTTGGAGTGAGAACTA		7.00933e-10	3.52997	1	0	0	0
FBgn0265060	lncRNA:CR44171	long non-coding RNA:CR44171	GAGA type 2	direct	ACTGTTGCTCGAGAACGAGTCTTTGAAT		7.00933e-10	3.52997	1	0	0	0
FBgn0260722	lncRNA:CR42549	long non-coding RNA:CR42549	GAGA type 2	indirect	TCTCGCCGGCGAGGGTGAGAAGGAAAAG		2.30227e-13	3.49995	1	0	0	0
FBgn0263587	lncRNA:CR43612	long non-coding RNA:CR43612	GAGA type 1	direct	AATACAATTGAGTGAGTTTAATTTC		2.20694e-06	3.49859	0	0	0	0
FBgn0263049	lncRNA:let7C	let-7 Complex	GAGA type 1	direct	AGATTGCCAGAGTGATAACCACAGT		0.000171737	3.35923	0	0	0	0
FBgn0263049	lncRNA:let7C	let-7 Complex	GAGA type 1	direct	CCGATGGCGGAGTTCTGATCATCGT		0.000171737	3.35923	0	0	0	0
FBgn0263049	lncRNA:let7C	let-7 Complex	GAGA type 2	direct	AAAAAGTTCAGAGTCTGAGCTTTCAGAA		0.000171737	3.35923	0	0	0	0
FBgn0001234	lncRNA:Hsrω	Heat shock RNA ω	GAGA type 1	indirect	TAAAAACAAGAGAGAGTTCTATAAT		1.58172e-13	3.3567	1	0	0	0
FBgn0267930	lncRNA:CR46211	long non-coding RNA:CR46211	GAGA type 2	indirect	AAATGTCGTCGAGAATGAGGTGGTTTTT		2.68472e-10	3.3086	0	0	0	0
FBgn0265949	lncRNA:CR44736	long non-coding RNA:CR44736	GAGA type 1	indirect	GTGAGAGAAGAGTGATTGCGGGATG		0.00202197	3.30132	1	0	0	0
FBgn0265949	lncRNA:CR44736	long non-coding RNA:CR44736	GAGA type 1	indirect	CGGGCCAACGAGTGAGACGAGTGTT		0.00202197	3.30132	1	0	0	0
FBgn0264914	lncRNA:CR44105	long non-coding RNA:CR44105	GAGA type 1	direct	AGAGAATCGGAGAGATAAACTCACT		4.60027e-09	3.29171	0	0	0	0
FBgn0264914	lncRNA:CR44105	long non-coding RNA:CR44105	GAGA type 1	indirect	AGAACCTATGAGTGAGTTTATCTCT		4.60027e-09	3.29171	0	0	0	0
FBgn0264914	lncRNA:CR44105	long non-coding RNA:CR44105	GAGA type 1	indirect	GTGAGTTTATCTCTCCGATTCTCTT		4.60027e-09	3.29171	0	0	0	0
FBgn0264436	lncRNA:CR43854	long non-coding RNA:CR43854	GAGA type 1	indirect	CATACCACCGAGCTCAGGCCCAAGG		0.000150836	3.28045	1	0	0	0
FBgn0267073	lncRNA:CR45517	long non-coding RNA:CR45517	GAGA type 1	indirect	CGAAACTCGGAGAGAAATAGAGAGC		0.0336981	3.22442	1	0	0	0
FBgn0267073	lncRNA:CR45517	long non-coding RNA:CR45517	GAGA type 2	indirect	GAGAGAAATAGAGAGCGAGTAGGGTTGC		0.0336981	3.22442	1	0	0	0
FBgn0267073	lncRNA:CR45517	long non-coding RNA:CR45517	GAGA type 2	indirect	TTTGGAAGCAGAGCTCTCTTAGGTATTG		0.0336981	3.22442	1	0	0	0
FBgn0266419	lncRNA:CR45059	long non-coding RNA:CR45059	GAGA type 1	direct	CACTTGAAAGAGTGACATAAAAATA		4.63118e-06	3.21997	0	0	0	0
FBgn0262886	lncRNA:CR43241	long non-coding RNA:CR43241	GAGA type 1	indirect	ATGTAATTTGAGTGATATATATCGA		0.000347866	3.16843	1	0	0	0
FBgn0262886	lncRNA:CR43241	long non-coding RNA:CR43241	GAGA type 1	direct	TATAAACGCGAGTGATGGCACTATA		0.000347866	3.16843	1	0	0	0
FBgn0266824	lncRNA:CR45286	long non-coding RNA:CR45286	GAGA type 1	direct	CTCTTCTGAGAGCTCATCCAAGACA		1.20194e-13	3.13626	0	0	0	0
FBgn0266824	lncRNA:CR45286	long non-coding RNA:CR45286	GAGA type 2	direct	AGGGCTGGGCTCTTCTGAGAGCTCATCC		1.20194e-13	3.13626	0	0	0	0
FBgn0267642	lncRNA:CR45980	long non-coding RNA:CR45980	GAGA type 1	direct	CTTCGGTGAGAGCTCGTTATTGAAA		7.41184e-05	3.1044	1	0	0	0
FBgn0267642	lncRNA:CR45980	long non-coding RNA:CR45980	GAGA type 1	indirect	GGAGAGCCAGAGATCCAAAACAAAA		7.41184e-05	3.1044	1	0	0	0
FBgn0267642	lncRNA:CR45980	long non-coding RNA:CR45980	GAGA type 2	direct	TTCCTTCGGTGAGAGCTCGTTATTGAAA		7.41184e-05	3.1044	1	0	0	0
FBgn0267642	lncRNA:CR45980	long non-coding RNA:CR45980	GAGA type 2	indirect	TGAGCGCGGAGAGCCAGAGATCCAAAAC		7.41184e-05	3.1044	1	0	0	0
FBgn0263659	lncRNA:CR43650	long non-coding RNA:CR43650	GAGA type 2	direct	AGTGGCAAGCGAGACTGAGATGGCGCTA		6.40097e-05	3.00967	1	0	0	0
FBgn0263659	lncRNA:CR43650	long non-coding RNA:CR43650	GAGA type 2	direct	CTCGCCGTGTGAGAGCGAGCAGGAGGGA		6.40097e-05	3.00967	1	0	0	0
FBgn0266396	lncRNA:CR45036	long non-coding RNA:CR45036	GAGA type 2	direct	TGAATGCGCCTCGAAAGAGCTGGCGAAA		0.0179294	2.94927	1	0	0	0
FBgn0266396	lncRNA:CR45036	long non-coding RNA:CR45036	GAGA type 2	direct	CAGTGGCGTAGAGTGTGAGGGGTGCTTA		0.0179294	2.94927	1	0	0	0
FBgn0265458	asRNA:CR44358	antisense RNA:CR44358	GAGA type 1	indirect	AGCTGGAGCGAGCTCCTCGGGCGGA		1.11608e-13	2.93758	1	0	0	0
FBgn0265458	asRNA:CR44358	antisense RNA:CR44358	GAGA type 1	indirect	CCTGCGTTTGAGTTCCTCGGAGGGA		1.11608e-13	2.93758	1	0	0	0
FBgn0265458	asRNA:CR44358	antisense RNA:CR44358	GAGA type 2	indirect	CGCCCTCAAGGAGCTGGAGTCCTGCCAG		1.11608e-13	2.93758	1	0	0	0
FBgn0266256	lncRNA:CR44951	long non-coding RNA:CR44951	GAGA type 1	direct	GTTATAAAAGAGCTCTTAAATAATC		4.34374e-07	2.8629	0	0	0	0
FBgn0266256	lncRNA:CR44951	long non-coding RNA:CR44951	GAGA type 1	indirect	ATTATTTAAGAGCTCTTTTATAACA		4.34374e-07	2.8629	0	0	0	0
FBgn0266897	lncRNA:CR45357	long non-coding RNA:CR45357	GAGA type 1	indirect	GCTACTTGGGAGAGAGCTTAGTAAA		0.0440684	2.82917	0	0	0	0
FBgn0264834	lncRNA:CR44042	long non-coding RNA:CR44042	GAGA type 1	direct	AAATCTATGGAGTGATTCTTATATA		0.018925	2.82342	1	0	0	0
FBgn0264834	lncRNA:CR44042	long non-coding RNA:CR44042	GAGA type 2	direct	GGGAAGGGAGGAGAGCGAGAGGAGAGAA		0.018925	2.82342	1	0	0	0
FBgn0264834	lncRNA:CR44042	long non-coding RNA:CR44042	GAGA type 2	direct	GAAGGGAGGAGAGCGAGAGGAGAGAAGG		0.018925	2.82342	1	0	0	0
FBgn0264834	lncRNA:CR44042	long non-coding RNA:CR44042	GAGA type 2	direct	AGCGAGAGGAGAGAAGGAGAGCGCGAGC		0.018925	2.82342	1	0	0	0
FBgn0264834	lncRNA:CR44042	long non-coding RNA:CR44042	GAGA type 2	direct	GAGAGAAGGAGAGCGCGAGCAGCGGTGC		0.018925	2.82342	1	0	0	0
FBgn0286937	lncRNA:CR46431	long non-coding RNA:CR46431	GAGA type 1	indirect	ATAAAACAAGAGAGAATGCTGCAGT		0.0459634	2.79934	1	0	0	0
FBgn0264877	lncRNA:CR44068	long non-coding RNA:CR44068	GAGA type 1	indirect	CACGAGAGTGAGTGAAAAGAGAACC		1.19191e-05	2.7526	0	0	0	0
FBgn0264877	lncRNA:CR44068	long non-coding RNA:CR44068	GAGA type 2	indirect	ATCAAAGCACGAGAGTGAGTGAAAAGAG		1.19191e-05	2.7526	0	0	0	0
FBgn0267922	lncRNA:CR46203	long non-coding RNA:CR46203	GAGA type 1	indirect	CGCCCATTAGAGAGATAATAGTTTT		0.00734516	2.62574	0	0	0	0
FBgn0267922	lncRNA:CR46203	long non-coding RNA:CR46203	GAGA type 2	indirect	CGATCGGGCAGAGTGTGAGAAAGTTGGA		0.00734516	2.62574	0	0	0	0
FBgn0265842	lncRNA:CR44631	long non-coding RNA:CR44631	GAGA type 1	indirect	GCCGGCGATGAGAGATTATGGCCAG		0.000289855	2.55528	1	0	0	0
FBgn0265842	lncRNA:CR44631	long non-coding RNA:CR44631	GAGA type 1	direct	AGAAATAGTGAGTGAATTAAAAATG		0.000289855	2.55528	1	0	0	0
FBgn0266784	lncRNA:CR45249	long non-coding RNA:CR45249	GAGA type 1	indirect	TGTTATTTCTCTCTCTGATTGAAAA		8.90239e-05	2.531	1	0	0	0
FBgn0266784	lncRNA:CR45249	long non-coding RNA:CR45249	GAGA type 1	direct	TCAATCAGAGAGAGAAATAACAAAG		8.90239e-05	2.531	1	0	0	0
FBgn0266784	lncRNA:CR45249	long non-coding RNA:CR45249	GAGA type 2	indirect	CTACGACTTTGAGTATGAGACCCTGACT		8.90239e-05	2.531	1	0	0	0
FBgn0264385	lncRNA:CR43837	long non-coding RNA:CR43837	GAGA type 1	direct	GCCGAAGCGGAGAGATTCAGAGAGC		0.0109286	2.47755	1	0	0	0
FBgn0264385	lncRNA:CR43837	long non-coding RNA:CR43837	GAGA type 1	direct	AGGGGGCGAGAGTGACTCAGTGATG		0.0109286	2.47755	1	0	0	0
FBgn0264385	lncRNA:CR43837	long non-coding RNA:CR43837	GAGA type 2	indirect	CAATATGGCAGAGTCCGAGTTGAAAGTT		0.0109286	2.47755	1	0	0	0
FBgn0264385	lncRNA:CR43837	long non-coding RNA:CR43837	GAGA type 2	direct	GAGATTCAGAGAGCGGGAGAGCGCAATC		0.0109286	2.47755	1	0	0	0
FBgn0267399	lncRNA:CR45761	long non-coding RNA:CR45761	GAGA type 1	indirect	ACACCTGCTGAGCGACACGCTTCTT		0.000907086	2.47354	0	0	0	0
FBgn0265414	lncRNA:CR44326	long non-coding RNA:CR44326	GAGA type 1	direct	TGCCACACAGAGTGAAAACTTCAGA		2.66987e-06	2.46132	0	0	0	0
FBgn0265414	lncRNA:CR44326	long non-coding RNA:CR44326	GAGA type 1	indirect	TTATCTGTGGAGTTCTTATCTGATG		2.66987e-06	2.46132	0	0	0	0
FBgn0263413	lncRNA:CR43459	long non-coding RNA:CR43459	GAGA type 1	indirect	TTTTTGTGGGAGAGATTCCACAATT		0.00339536	2.4611	1	0	0	0
FBgn0263413	lncRNA:CR43459	long non-coding RNA:CR43459	GAGA type 1	direct	GTGAGTGCGGAGAGAGAGCTTTAAC		0.00339536	2.4611	1	0	0	0
FBgn0263413	lncRNA:CR43459	long non-coding RNA:CR43459	GAGA type 2	direct	AATAGATAAAGAGAGCTAGATAGTTTTT		0.00339536	2.4611	1	0	0	0
FBgn0263413	lncRNA:CR43459	long non-coding RNA:CR43459	GAGA type 2	indirect	TTGTACGAATGAATCAGAGTAATGTTTA		0.00339536	2.4611	1	0	0	0
FBgn0263413	lncRNA:CR43459	long non-coding RNA:CR43459	GAGA type 2	direct	TGTGAGTGCGGAGAGAGAGCTTTAACCG		0.00339536	2.4611	1	0	0	0
FBgn0058172	lncRNA:CR40172	long non-coding RNA:CR40172	GAGA type 2	direct	TACTATAAATGAGAAAGAGTTCGTTGTT		2.09899e-14	2.46023	0	0	0	0
FBgn0058172	lncRNA:CR40172	long non-coding RNA:CR40172	GAGA type 2	indirect	AGTCCTGTAAGAGTGCGAGTGTGTGCGT		2.09899e-14	2.46023	0	0	0	0
FBgn0266968	lncRNA:CR45419	long non-coding RNA:CR45419	GAGA type 2	direct	AGGACTGGACGAGCGAGAGTCTGTTCTG		0.000351603	2.45935	0	0	0	0
FBgn0267797	lncRNA:CR46122	long non-coding RNA:CR46122	GAGA type 1	direct	AACGAGCAGGAGCGGTATATGTAAC		3.64022e-07	2.45463	1	0	0	0
FBgn0267797	lncRNA:CR46122	long non-coding RNA:CR46122	GAGA type 1	indirect	AGGTGCCACGAGCTCTTTGGACAAG		3.64022e-07	2.45463	1	0	0	0
FBgn0267797	lncRNA:CR46122	long non-coding RNA:CR46122	GAGA type 2	direct	TCTGGCGAACGAGCAGGAGCGGTATATG		3.64022e-07	2.45463	1	0	0	0
FBgn0266730	lncRNA:CR45203	long non-coding RNA:CR45203	GAGA type 1	direct	AAAAAAAATGAGAGAGAAGAAAGTG		2.52431e-17	2.45377	1	0	0	0
FBgn0266730	lncRNA:CR45203	long non-coding RNA:CR45203	GAGA type 1	direct	AAAAAATGAGAGAGAAGAAAGTGAA		2.52431e-17	2.45377	1	0	0	0
FBgn0266730	lncRNA:CR45203	long non-coding RNA:CR45203	GAGA type 1	direct	GTGAGAGGAGAGTGACAAATCCCTT		2.52431e-17	2.45377	1	0	0	0
FBgn0266730	lncRNA:CR45203	long non-coding RNA:CR45203	GAGA type 2	direct	ATTTGGATGCGAGTGCGAGTCCATAAAA		2.52431e-17	2.45377	1	0	0	0
FBgn0266676	lncRNA:CR45166	long non-coding RNA:CR45166	GAGA type 1	direct	AGTGAGTCAGAGCTCGAAACTCACA		1.3697e-07	2.4488	1	0	0	0
FBgn0266676	lncRNA:CR45166	long non-coding RNA:CR45166	GAGA type 2	indirect	GTGCTAATGTGAGCTGGAGCACTTTTCT		1.3697e-07	2.4488	1	0	0	0
FBgn0266676	lncRNA:CR45166	long non-coding RNA:CR45166	GAGA type 2	direct	ATTTCTGAGTGAGTCAGAGCTCGAAACT		1.3697e-07	2.4488	1	0	0	0
FBgn0266821	lncRNA:CR45283	long non-coding RNA:CR45283	GAGA type 1	indirect	GAGGCCGAGGAGAGAAAAACTTTTC		0.0041333	2.40929	1	1	0	0
FBgn0266821	lncRNA:CR45283	long non-coding RNA:CR45283	GAGA type 2	indirect	GCAAGAAAATGAGGAGGAGCAATAGGGC		0.0041333	2.40929	1	1	0	0
FBgn0267290	lncRNA:CR45726	long non-coding RNA:CR45726	GAGA type 2	indirect	TATAAAATGATCTTGAGAGCAGCGGTGC		4.28355e-06	2.38031	1	0	0	0
FBgn0265590	lncRNA:CR44417	long non-coding RNA:CR44417	GAGA type 2	indirect	CTAGATGGGTGAGTTTGAGTAACTTCTT		0.000284345	2.37097	0	0	0	0
FBgn0266183	lncRNA:CR44889	long non-coding RNA:CR44889	GAGA type 1	indirect	GATATTCGTGAGTGAGAACGCAGAA		0.0353176	2.34456	1	0	0	0
FBgn0266183	lncRNA:CR44889	long non-coding RNA:CR44889	GAGA type 2	indirect	GTGGCGGTGTGAGTGAGAGCGCGTAACA		0.0353176	2.34456	1	0	0	0
FBgn0266183	lncRNA:CR44889	long non-coding RNA:CR44889	GAGA type 2	indirect	GGATATTCGTGAGTGAGAACGCAGAAAG		0.0353176	2.34456	1	0	0	0
FBgn0266183	lncRNA:CR44889	long non-coding RNA:CR44889	GAGA type 2	indirect	ACAACGAGCAGAGCCGGAGAGTCCACAA		0.0353176	2.34456	1	0	0	0
FBgn0266208	lncRNA:CR44903	long non-coding RNA:CR44903	GAGA type 2	direct	TAAAACACGTGAGTAAGAACTGTAAAAA		4.82043e-06	2.32518	1	0	0	0
FBgn0263453	asRNA:CR43476	antisense RNA:CR43476	GAGA type 1	direct	TCCGCCTCCGAGTGAAGATGTAATA		0.0246731	2.31744	1	0	0	0
FBgn0051781	lncRNA:CR31781	long non-coding RNA:CR31781	GAGA type 1	indirect	CAACTGGCGGAGCTCCAAGCGAACG		8.47689e-07	2.31448	1	0	0	0
FBgn0051781	lncRNA:CR31781	long non-coding RNA:CR31781	GAGA type 1	indirect	GCACTTCGTGAGCTCCTCGGAAAAT		8.47689e-07	2.31448	1	0	0	0
FBgn0051781	lncRNA:CR31781	long non-coding RNA:CR31781	GAGA type 2	direct	CAAAAACGTTGAAAAAGAGCGGGCAGCG		8.47689e-07	2.31448	1	0	0	0
FBgn0264550	lncRNA:CR43929	long non-coding RNA:CR43929	GAGA type 1	direct	TGGGAGTGAGAGAGAGAGAGTGAGG		0.0366207	2.25879	0	0	0	0
FBgn0264550	lncRNA:CR43929	long non-coding RNA:CR43929	GAGA type 2	direct	GGGTTTATGGGAGTGAGAGAGAGAGAGT		0.0366207	2.25879	0	0	0	0
FBgn0264550	lncRNA:CR43929	long non-coding RNA:CR43929	GAGA type 2	direct	TTATGGGAGTGAGAGAGAGAGAGTGAGG		0.0366207	2.25879	0	0	0	0
FBgn0264550	lncRNA:CR43929	long non-coding RNA:CR43929	GAGA type 2	direct	ATGGGAGTGAGAGAGAGAGAGTGAGGTT		0.0366207	2.25879	0	0	0	0
FBgn0264550	lncRNA:CR43929	long non-coding RNA:CR43929	GAGA type 2	direct	GGGAGTGAGAGAGAGAGAGTGAGGTTTA		0.0366207	2.25879	0	0	0	0
FBgn0263590	asRNA:CR43615	antisense RNA:CR43615	GAGA type 1	direct	TTTGCATTTGAGCGACGAAATCAAG		0.000809464	2.24852	0	0	0	0
FBgn0263590	asRNA:CR43615	antisense RNA:CR43615	GAGA type 2	indirect	ACTTGAAATGGAGCAGGAGAGGCAACAA		0.000809464	2.24852	0	0	0	0
FBgn0265078	lncRNA:CR44189	long non-coding RNA:CR44189	GAGA type 1	direct	GGGAGAACTGAGATCCAATAAATCC		1.50256e-05	2.24561	0	0	0	0
FBgn0265078	lncRNA:CR44189	long non-coding RNA:CR44189	GAGA type 1	direct	GAATTACTCGAGCTCAAATTTCAGA		1.50256e-05	2.24561	0	0	0	0
FBgn0265078	lncRNA:CR44189	long non-coding RNA:CR44189	GAGA type 1	indirect	CTGAAATTTGAGCTCGAGTAATTCT		1.50256e-05	2.24561	0	0	0	0
FBgn0265078	lncRNA:CR44189	long non-coding RNA:CR44189	GAGA type 2	indirect	TCTGAAATTTGAGCTCGAGTAATTCTTC		1.50256e-05	2.24561	0	0	0	0
FBgn0050055	lncRNA:CR30055	long non-coding RNA:CR30055	GAGA type 1	indirect	TGCGGATTCGAGTTCAAACAATATT		0.000406398	2.24413	0	0	0	0
FBgn0267933	lncRNA:CR46213	long non-coding RNA:CR46213	GAGA type 1	indirect	AATCAGTTGGAGAGAATCTGCAAAT		0.0294447	2.22145	1	0	0	0
FBgn0267933	lncRNA:CR46213	long non-coding RNA:CR46213	GAGA type 1	direct	AACGTGAGGGAGCTCTTAAGGGAAA		0.0294447	2.22145	1	0	0	0
FBgn0019661	lncRNA:roX1	long non-coding RNA on the X 1	GAGA type 2	indirect	CGGCGACTGTGAGTAGGAGAACTCCAAG		3.36338e-06	2.2146	0	0	0	0
FBgn0263582	lncRNA:CR43607	long non-coding RNA:CR43607	GAGA type 2	indirect	TGCGCCAGTTGAGGTTGAGCGGTGTGGA		0.000296052	2.17532	1	0	0	0
FBgn0263582	lncRNA:CR43607	long non-coding RNA:CR43607	GAGA type 2	direct	GTGTGTGGGTGAGAATGAGAGTGGGTGG		0.000296052	2.17532	1	0	0	0
FBgn0267932	lncRNA:CR46212	long non-coding RNA:CR46212	GAGA type 1	direct	ATGAATGATGAGTGGTTCGACCAAG		0.00130039	2.13413	1	0	0	0
FBgn0265382	lncRNA:CR44323	long non-coding RNA:CR44323	GAGA type 1	indirect	GCCAGTTAGGAGTGACACGTTCACT		0.000972386	2.13287	1	0	0	0
FBgn0266549	lncRNA:CR45102	long non-coding RNA:CR45102	GAGA type 1	direct	CAAAAACGCGAGAGAAAACGCTAGC		0.0122184	2.10371	0	0	0	0
FBgn0264539	lncRNA:CR43918	long non-coding RNA:CR43918	GAGA type 1	direct	AATGGAATGGAGCGAGTTAAGCGCA		3.13294e-06	2.08222	0	0	0	0
FBgn0266074	lncRNA:CR44827	long non-coding RNA:CR44827	GAGA type 2	indirect	TTCGCTGGGCGAGTGTGAGTTGGCCTTT		8.75921e-05	2.06514	0	0	0	0
FBgn0265690	lncRNA:CR44497	long non-coding RNA:CR44497	GAGA type 1	direct	GGACCTCCAGAGAGACAGCTGAAGT		0.000117272	2.03095	0	0	0	0
FBgn0265690	lncRNA:CR44497	long non-coding RNA:CR44497	GAGA type 2	direct	CAGCTGAAGTGAGCACTCGCAGAAAAAG		0.000117272	2.03095	0	0	0	0
FBgn0265348	lncRNA:CR44302	long non-coding RNA:CR44302	GAGA type 2	direct	TCAGCTCCGTGAGTTAGAGATTCTCGCC		1.87264e-08	0.495921	1	0	0	0
FBgn0263339	lncRNA:CR43420	long non-coding RNA:CR43420	GAGA type 1	direct	ATGCGGCCCGAGTGACTTTTATTTA		0.00923928	0.490867	0	0	0	0
FBgn0265893	lncRNA:CR44682	long non-coding RNA:CR44682	GAGA type 1	direct	ATGTAATGGGAGAGAAATAAACGAA		0.0129799	0.490414	0	0	0	0
FBgn0266233	lncRNA:CR44928	long non-coding RNA:CR44928	GAGA type 1	direct	ACCCTAAGTGAGCTCCAACCATTTG		0.0398318	0.488631	1	0	0	0
FBgn0265801	lncRNA:CR44590	long non-coding RNA:CR44590	GAGA type 1	direct	TCCAGCTGTGAGCGGGTCGCATAGT		4.49865e-05	0.485999	0	0	0	0
FBgn0265709	lncRNA:CR44516	long non-coding RNA:CR44516	GAGA type 1	indirect	GGCAATTTTGAGAGACTGCGCCAAA		0.0330961	0.483903	1	0	0	0
FBgn0265709	lncRNA:CR44516	long non-coding RNA:CR44516	GAGA type 1	direct	CGAGCTCAGGAGCGACGTTAGGATG		0.0330961	0.483903	1	0	0	0
FBgn0265709	lncRNA:CR44516	long non-coding RNA:CR44516	GAGA type 1	direct	GACATCGGAGAGCTCGTTACGATTT		0.0330961	0.483903	1	0	0	0
FBgn0267758	asRNA:CR46089	antisense RNA:CR46089	GAGA type 2	indirect	CTCCGCCAGCGAGATGGAGAGGAAAACC		0.0022615	0.480647	1	0	0	0
FBgn0265508	asRNA:CR44370	antisense RNA:CR44370	GAGA type 1	indirect	TTGGTTCCTGAGCTTTTTATCTTCA		5.76436e-08	0.478537	1	0	0	0
FBgn0265508	asRNA:CR44370	antisense RNA:CR44370	GAGA type 1	indirect	CCATGTCCCGAGTGAAATAAAGTCC		5.76436e-08	0.478537	1	0	0	0
FBgn0265508	asRNA:CR44370	antisense RNA:CR44370	GAGA type 2	direct	GAATACTTTCGAGCCTGAGCCCGGATCG		5.76436e-08	0.478537	1	0	0	0
FBgn0265508	asRNA:CR44370	antisense RNA:CR44370	GAGA type 2	indirect	GAAGGGGGCCAAGAGAGAGTGAGAGACC		5.76436e-08	0.478537	1	0	0	0
FBgn0265508	asRNA:CR44370	antisense RNA:CR44370	GAGA type 2	indirect	GGGGCCAAGAGAGAGTGAGAGACCCCGT		5.76436e-08	0.478537	1	0	0	0
FBgn0265508	asRNA:CR44370	antisense RNA:CR44370	GAGA type 2	indirect	GGCCAAGAGAGAGTGAGAGACCCCGTGG		5.76436e-08	0.478537	1	0	0	0
FBgn0266535	lncRNA:CR45096	long non-coding RNA:CR45096	GAGA type 2	indirect	GTCGATCATCGAGCCCGAGATGCTGGTG		0.0267354	0.477449	1	0	0	0
FBgn0266071	lncRNA:CR44824	long non-coding RNA:CR44824	GAGA type 2	indirect	GTGACTTCGAGAGCTCGAGCAACTCCCA		0.000201229	0.473622	0	0	0	0
FBgn0266021	lncRNA:CR44786	long non-coding RNA:CR44786	GAGA type 2	direct	ACAACAACGTGAGTAAGCTTGTTGAGTC		8.15865e-05	0.471721	1	0	0	0
FBgn0266021	lncRNA:CR44786	long non-coding RNA:CR44786	GAGA type 2	direct	CACACATAGTGAGTCCTAGAACTGAAAA		8.15865e-05	0.471721	1	0	0	0
FBgn0266206	lncRNA:CR44901	long non-coding RNA:CR44901	GAGA type 1	indirect	ACATGAAAAGAGAGAGAAAGAGCTG		0.0049542	0.470611	1	0	0	0
FBgn0266206	lncRNA:CR44901	long non-coding RNA:CR44901	GAGA type 2	indirect	TGAAAAGAGAGAGAAAGAGCTGGGCGGC		0.0049542	0.470611	1	0	0	0
FBgn0266225	lncRNA:CR44920	long non-coding RNA:CR44920	GAGA type 1	direct	TGTGTGTGTGAGTGAATTATGGCCT		4.07201e-07	0.468002	1	0	0	0
FBgn0266225	lncRNA:CR44920	long non-coding RNA:CR44920	GAGA type 1	direct	GAAAAAAGAGAGTGAAAAAGCGACA		4.07201e-07	0.468002	1	0	0	0
FBgn0267800	lncRNA:CR46125	long non-coding RNA:CR46125	GAGA type 1	direct	GATAAATTAGAGAGAGAGCCTGGCA		0.000592778	0.466758	1	0	0	0
FBgn0267800	lncRNA:CR46125	long non-coding RNA:CR46125	GAGA type 2	direct	TGATAAATTAGAGAGAGAGCCTGGCACC		0.000592778	0.466758	1	0	0	0
FBgn0265878	lncRNA:CR44667	long non-coding RNA:CR44667	GAGA type 1	indirect	AGAGATAGCGAGAGATCGCACCTTT		9.98495e-09	0.466639	0	0	0	0
FBgn0265878	lncRNA:CR44667	long non-coding RNA:CR44667	GAGA type 2	indirect	TGGCGCAGAAGAGCGAGAGG		9.98495e-09	0.466639	0	0	0	0
FBgn0266883	lncRNA:CR45344	long non-coding RNA:CR45344	GAGA type 1	direct	GAAAGTCACGAGAGACTTAAAAGAA		0.0107707	0.463851	0	0	0	0
FBgn0266140	lncRNA:CR44846	long non-coding RNA:CR44846	GAGA type 2	direct	GGTCCCCGGGGAGAGGGAGTGGAACTGC		1.36819e-06	0.462779	1	0	0	0
FBgn0266389	lncRNA:CR45029	long non-coding RNA:CR45029	GAGA type 1	direct	GACGAACTTGAGCTCTTCACTTTTC		1.01669e-05	0.461463	1	0	0	0
FBgn0266389	lncRNA:CR45029	long non-coding RNA:CR45029	GAGA type 1	indirect	TTTCATTGCGAG		1.01669e-05	0.461463	1	0	0	0
FBgn0266389	lncRNA:CR45029	long non-coding RNA:CR45029	GAGA type 2	direct	AGTAAAAAGTGAGTTGGAGAAATGGGAG		1.01669e-05	0.461463	1	0	0	0
FBgn0264568	lncRNA:CR43940	long non-coding RNA:CR43940	GAGA type 1	indirect	TACTCAAACGAGAGATAAGTTTAAT		3.98416e-06	0.457591	0	0	0	0
FBgn0267080	lncRNA:CR45524	long non-coding RNA:CR45524	GAGA type 1	indirect	ATGAAGAAGGAGCTCCAAAGCTCAG		3.7195e-05	0.456594	1	0	0	0
FBgn0267080	lncRNA:CR45524	long non-coding RNA:CR45524	GAGA type 1	indirect	TGGCGAAAAGAGAGAAAAACAAAAT		3.7195e-05	0.456594	1	0	0	0
FBgn0267080	lncRNA:CR45524	long non-coding RNA:CR45524	GAGA type 1	direct	TGAGCTTTGGAGCTCCTTCTTCATG		3.7195e-05	0.456594	1	0	0	0
FBgn0267625	lncRNA:CR45963	long non-coding RNA:CR45963	GAGA type 1	direct	AATAATCCAGAGAGACAGCACTGAT		9.85302e-07	0.455047	0	0	0	0
FBgn0263613	lncRNA:CR43622	long non-coding RNA:CR43622	GAGA type 2	direct	CCGTAGCATTGAGAACTCTCTTTCGCAG		0.00473047	0.452698	0	1	0	0
FBgn0286890	lncRNA:CR46409	long non-coding RNA:CR46409	GAGA type 1	indirect	TGTAGAAACGAGCGAAGAAGTGACG		2.73825e-05	0.452102	1	0	0	0
FBgn0286890	lncRNA:CR46409	long non-coding RNA:CR46409	GAGA type 1	indirect	TTTTTTTTAGAGAGATTTTTTTCGA		2.73825e-05	0.452102	1	0	0	0
FBgn0286890	lncRNA:CR46409	long non-coding RNA:CR46409	GAGA type 1	indirect	TGTGCGTCAGAGAGATTTTCACCAC		2.73825e-05	0.452102	1	0	0	0
FBgn0265980	lncRNA:CR44759	long non-coding RNA:CR44759	GAGA type 1	direct	TGGACGAGGGAGCTCCAGCTTTGTT		9.40033e-06	0.451213	1	0	0	0
FBgn0265980	lncRNA:CR44759	long non-coding RNA:CR44759	GAGA type 2	direct	GTCAAATTCCGAGTCGGAGCTGGAGGAA		9.40033e-06	0.451213	1	0	0	0
FBgn0265980	lncRNA:CR44759	long non-coding RNA:CR44759	GAGA type 2	direct	GGAGCCGGATGAGGAGGAGTTGGACTTG		9.40033e-06	0.451213	1	0	0	0
FBgn0265980	lncRNA:CR44759	long non-coding RNA:CR44759	GAGA type 2	indirect	TAGCGACAGCGAGTCCGAGACCAATCTG		9.40033e-06	0.451213	1	0	0	0
FBgn0265980	lncRNA:CR44759	long non-coding RNA:CR44759	GAGA type 2	direct	GTCGGAATCAGAGTCGGAGCGGGAACTT		9.40033e-06	0.451213	1	0	0	0
FBgn0265980	lncRNA:CR44759	long non-coding RNA:CR44759	GAGA type 2	indirect	GGCAGCCAGCGAGGCAGAGTCCTGCACA		9.40033e-06	0.451213	1	0	0	0
FBgn0265980	lncRNA:CR44759	long non-coding RNA:CR44759	GAGA type 2	indirect	TGGTTTGTCCGAGAAGGAGCGTGAAACT		9.40033e-06	0.451213	1	0	0	0
FBgn0263661	lncRNA:CR43652	long non-coding RNA:CR43652	GAGA type 1	direct	GGGTAAGAGGAGTGACAACGATAGG		4.7208e-06	0.440744	0	0	0	0
FBgn0266621	lncRNA:CR45128	long non-coding RNA:CR45128	GAGA type 1	indirect	TTGCTATCAGAGATCAATATTGAAA		6.43125e-05	0.440084	0	0	0	0
FBgn0267956	lncRNA:CR46236	long non-coding RNA:CR46236	GAGA type 1	direct	CTGGGCTGGGAGAGGAATACCAATG		0.00121233	0.427893	1	0	0	0
FBgn0267956	lncRNA:CR46236	long non-coding RNA:CR46236	GAGA type 2	direct	GACACAAGATGAGATCTAGATGGCGATG		0.00121233	0.427893	1	0	0	0
FBgn0267764	lncRNA:CR46095	long non-coding RNA:CR46095	GAGA type 1	indirect	TCTTTACAAGAGCTCCTGCTCTTTT		1.74695e-08	0.427105	0	0	0	0
FBgn0267764	lncRNA:CR46095	long non-coding RNA:CR46095	GAGA type 2	direct	GCACATAAAAGAGCAGGAGCTCTTGTAA		1.74695e-08	0.427105	0	0	0	0
FBgn0265169	asRNA:CR44238	antisense RNA:CR44238	GAGA type 1	indirect	CAATGTCATGAGTGGGAATTCAAAG		0.0439401	0.42485	1	0	0	0
FBgn0266957	lncRNA:CR45408	long non-coding RNA:CR45408	GAGA type 1	direct	GAGGGTTGGGAGCTCGGTAAAGGAG		4.85559e-10	0.4244	1	0	0	0
FBgn0266957	lncRNA:CR45408	long non-coding RNA:CR45408	GAGA type 1	indirect	GGGAAAACAGAGAGATAGAGGAAAG		4.85559e-10	0.4244	1	0	0	0
FBgn0266957	lncRNA:CR45408	long non-coding RNA:CR45408	GAGA type 2	indirect	GATAAGAATCGAGTGCTCTAACCGGACA		4.85559e-10	0.4244	1	0	0	0
FBgn0266957	lncRNA:CR45408	long non-coding RNA:CR45408	GAGA type 2	indirect	TGCCAAAAGTGAGAGAGAGGAAAAGCGG		4.85559e-10	0.4244	1	0	0	0
FBgn0266957	lncRNA:CR45408	long non-coding RNA:CR45408	GAGA type 2	indirect	GGAAAACAGAGAGATAGAGGAAAGCAAC		4.85559e-10	0.4244	1	0	0	0
FBgn0264348	lncRNA:CR43804	long non-coding RNA:CR43804	GAGA type 2	direct	GGATTTCCAGGAGAGGGAGTTCCAAGTT		7.37814e-06	0.415811	0	0	0	0
FBgn0266693	lncRNA:CR45183	long non-coding RNA:CR45183	GAGA type 1	indirect	CTGAAAATCGAGAGACCCGGCCTTC		0.00040065	0.414925	0	0	0	0
FBgn0266693	lncRNA:CR45183	long non-coding RNA:CR45183	GAGA type 1	indirect	TTTCAAATTGAGCGAATCGGTAAAA		0.00040065	0.414925	0	0	0	0
FBgn0267757	lncRNA:CR46088	long non-coding RNA:CR46088	GAGA type 1	indirect	ACTCGACTTGAGTTCGAATCGAATG		3.77138e-05	0.413485	1	0	0	0
FBgn0267757	lncRNA:CR46088	long non-coding RNA:CR46088	GAGA type 1	direct	GATGCTGAAGAGAGACGAAGATCCT		3.77138e-05	0.413485	1	0	0	0
FBgn0267816	lncRNA:CR46141	long non-coding RNA:CR46141	GAGA type 2	direct	GAAGCAGGCAGAGAGGGAGAGCAAGAAC		4.78725e-07	0.408889	1	0	0	0
FBgn0267816	lncRNA:CR46141	long non-coding RNA:CR46141	GAGA type 2	direct	AGCAGGCAGAGAGGGAGAGCAAGAACGC		4.78725e-07	0.408889	1	0	0	0
FBgn0262951	lncRNA:CR43270	long non-coding RNA::CR43270	GAGA type 1	indirect	TTATCTGGCGAGCGATTTTTATTTG		0.0496455	0.40862	1	0	0	0
FBgn0262951	lncRNA:CR43270	long non-coding RNA::CR43270	GAGA type 1	indirect	GGAACCGGAGAGTGACAGCTTGGAG		0.0496455	0.40862	1	0	0	0
FBgn0262951	lncRNA:CR43270	long non-coding RNA::CR43270	GAGA type 1	direct	ATCAAGATGGAGAGAGCAACTGAGC		0.0496455	0.40862	1	0	0	0
FBgn0262951	lncRNA:CR43270	long non-coding RNA::CR43270	GAGA type 2	indirect	AGTGCTACCCGAGAACGAGATGGCTGCG		0.0496455	0.40862	1	0	0	0
FBgn0265882	lncRNA:CR44671	long non-coding RNA:CR44671	GAGA type 1	indirect	CGACGAGCTGAGCTCCGGCTGAAGG		6.33283e-05	0.403732	1	1	0	0
FBgn0265882	lncRNA:CR44671	long non-coding RNA:CR44671	GAGA type 1	indirect	CCG		6.33283e-05	0.403732	1	1	0	0
FBgn0265882	lncRNA:CR44671	long non-coding RNA:CR44671	GAGA type 2	indirect	TGGCCGAGCTGAGAACGAGTGGAGTACA		6.33283e-05	0.403732	1	1	0	0
FBgn0265450	lncRNA:CR44350	long non-coding RNA:CR44350	GAGA type 1	direct	TCAGTGATAGAGCTTGGTAGATAAT		8.09013e-07	0.40307	1	0	0	0
FBgn0265450	lncRNA:CR44350	long non-coding RNA:CR44350	GAGA type 1	indirect	AGAAGGGGGGAGAGGGGGCCGTATA		8.09013e-07	0.40307	1	0	0	0
FBgn0266565	asRNA:CR45104	antisense RNA:CR45104	GAGA type 1	direct	GTGAAATTGGAGAGAGAACATTTTC		5.62086e-05	0.401678	0	0	0	0
FBgn0266565	asRNA:CR45104	antisense RNA:CR45104	GAGA type 1	direct	GAAATTGGAGAGAGAACATTTTCCC		5.62086e-05	0.401678	0	0	0	0
FBgn0266565	asRNA:CR45104	antisense RNA:CR45104	GAGA type 1	indirect	TTTTGGGTGGAGCTCGTCCAGA		5.62086e-05	0.401678	0	0	0	0
FBgn0267957	lncRNA:CR46237	long non-coding RNA:CR46237	GAGA type 1	indirect	GCGAAACTTGAGTGACAACAGCAGC		0.0282705	0.391608	1	0	0	0
FBgn0267168	lncRNA:CR45608	long non-coding RNA:CR45608	GAGA type 1	indirect	AGGTTAACCGAGAGATACAAATACA		0.0140749	0.388957	1	1	0	0
FBgn0263764	lncRNA:CR43681	long non-coding RNA:CR43681	GAGA type 2	direct	CGAATTGGTTGAGTGGGAGCGGAATTAC		4.56107e-11	0.388447	0	0	0	0
FBgn0263764	lncRNA:CR43681	long non-coding RNA:CR43681	GAGA type 2	direct	CATTCGAAGCGAGATGGAGCTAGTTTGC		4.56107e-11	0.388447	0	0	0	0
FBgn0265820	lncRNA:CR44609	long non-coding RNA:CR44609	GAGA type 2	indirect	TTAGCACCCGGAGTGCGAGCGTAAAAAA		2.66717e-06	0.386778	0	0	0	0
FBgn0266771	lncRNA:CR45236	long non-coding RNA:CR45236	GAGA type 2	direct	AAATGAACACGAGCAAGAGTGCGAGGTC		8.36164e-10	0.380289	0	0	0	0
FBgn0265818	lncRNA:CR44607	long non-coding RNA:CR44607	GAGA type 1	direct	CCCCCCCGGGAGCGAGTTAAATATG		0.00510791	0.375978	1	0	0	0
FBgn0265818	lncRNA:CR44607	long non-coding RNA:CR44607	GAGA type 1	indirect	GCACATTAATCTCGACTTATGGAAT		0.00510791	0.375978	1	0	0	0
FBgn0265818	lncRNA:CR44607	long non-coding RNA:CR44607	GAGA type 2	direct	ATCGATATCGGAGCTGGAGTTCTACCAA		0.00510791	0.375978	1	0	0	0
FBgn0266844	lncRNA:CR45306	long non-coding RNA:CR45306	GAGA type 1	indirect	ACCGCCGCCGAGAGAGAGACCAAAG		0.0487016	0.375911	1	0	0	0
FBgn0266844	lncRNA:CR45306	long non-coding RNA:CR45306	GAGA type 2	indirect	AACCGCCGCCGAGAGAGAGACCAAAGAT		0.0487016	0.375911	1	0	0	0
FBgn0267118	lncRNA:CR45558	long non-coding RNA:CR45558	GAGA type 1	direct	TCAGTCACAGAGATCAAATTAAAAT		2.19318e-05	0.370441	1	0	0	0
FBgn0267118	lncRNA:CR45558	long non-coding RNA:CR45558	GAGA type 1	direct	AAAAAACTAGAGAGAATGCTATAGT		2.19318e-05	0.370441	1	0	0	0
FBgn0267118	lncRNA:CR45558	long non-coding RNA:CR45558	GAGA type 1	indirect	TAATTATTTGAGCGAGTCGGAAAAT		2.19318e-05	0.370441	1	0	0	0
FBgn0267118	lncRNA:CR45558	long non-coding RNA:CR45558	GAGA type 2	indirect	AACTATCTTTGAGAAAGCTTTAATAGCT		2.19318e-05	0.370441	1	0	0	0
FBgn0264084	lncRNA:CR43753	long non-coding RNA:CR43753	GAGA type 1	indirect	TTTTATTTAGAGCTCTTTAAAATAA		8.2904e-12	0.36996	1	1	0	0
FBgn0264084	lncRNA:CR43753	long non-coding RNA:CR43753	GAGA type 1	direct	TATTTTAAAGAGCTCTAAATAAAAA		8.2904e-12	0.36996	1	1	0	0
FBgn0267169	lncRNA:CR45609	long non-coding RNA:CR45609	GAGA type 1	direct	GGTCAAAACGAGCTCCAGCAAATCA		0.039953	0.364985	0	0	0	0
FBgn0267169	lncRNA:CR45609	long non-coding RNA:CR45609	GAGA type 2	indirect	CCGATGGGTTGAGGGGGAGCCGGTGGGG		0.039953	0.364985	0	0	0	0
FBgn0267169	lncRNA:CR45609	long non-coding RNA:CR45609	GAGA type 2	indirect	GCTCTCCACAGAGAACGAGTGAGAGAGG		0.039953	0.364985	0	0	0	0
FBgn0267169	lncRNA:CR45609	long non-coding RNA:CR45609	GAGA type 2	indirect	CACAGAGAACGAGTGAGAGAGGGAGAGG		0.039953	0.364985	0	0	0	0
FBgn0267169	lncRNA:CR45609	long non-coding RNA:CR45609	GAGA type 2	indirect	GAACGAGTGAGAGAGGGAGAGGGCGAGA		0.039953	0.364985	0	0	0	0
FBgn0267169	lncRNA:CR45609	long non-coding RNA:CR45609	GAGA type 2	indirect	ACGAGTGAGAGAGGGAGAGGGCGAGAGA		0.039953	0.364985	0	0	0	0
FBgn0267169	lncRNA:CR45609	long non-coding RNA:CR45609	GAGA type 2	indirect	GAGAGAGGGAGAGGGCGAGAGACAGAGA		0.039953	0.364985	0	0	0	0
FBgn0267169	lncRNA:CR45609	long non-coding RNA:CR45609	GAGA type 2	indirect	GAGAGGGCGAGAGACAGAGAGGTACAGT		0.039953	0.364985	0	0	0	0
FBgn0286042	sisRNA:CR46364	stable intronic sequence RNA CR46364	GAGA type 1	indirect	GTGTTGCTTGAGTTCAAAATTTATT		1.19052e-05	0.364793	1	0	0	0
FBgn0286042	sisRNA:CR46364	stable intronic sequence RNA CR46364	GAGA type 2	indirect	AGGAGCAGCGGAGCGTGAGCGCACTGGC		1.19052e-05	0.364793	1	0	0	0
FBgn0263872	lncRNA:CR43719	long non-coding RNA:CR43719	GAGA type 1	indirect	GGCAACGCAGAGAGAAAGCTTCTCA		7.92064e-10	0.364502	1	0	0	0
FBgn0263872	lncRNA:CR43719	long non-coding RNA:CR43719	GAGA type 1	indirect	TCTCAAACAGAGAGAGGTTCTCAGG		7.92064e-10	0.364502	1	0	0	0
FBgn0263872	lncRNA:CR43719	long non-coding RNA:CR43719	GAGA type 2	indirect	CGAAATGTGCGAGACTGAGAAGCTTCAG		7.92064e-10	0.364502	1	0	0	0
FBgn0263872	lncRNA:CR43719	long non-coding RNA:CR43719	GAGA type 2	direct	CTCGCTCAACGAGTGCTCTACATCGCAT		7.92064e-10	0.364502	1	0	0	0
FBgn0266258	lncRNA:CR44953	long non-coding RNA:CR44953	GAGA type 1	indirect	AAACTATTTGAGTGAAGCGAATTCC		0.00069499	0.354796	1	0	0	0
FBgn0266138	lncRNA:CR44844	long non-coding RNA:CR44844	GAGA type 2	indirect	TTTTTTTTCTGA		0.0134744	0.35128	0	0	0	0
FBgn0267945	lncRNA:CR46225	long non-coding RNA:CR46225	GAGA type 1	indirect	GGGACACTGGAGCGAGGGCTTGAAA		0.00238068	0.345793	1	0	0	0
FBgn0267786	lncRNA:CR46117	long non-coding RNA:CR46117	GAGA type 1	indirect	CAAATAATAGAGAGAGAACTTTTAA		1.4507e-08	0.345575	0	0	0	0
FBgn0267786	lncRNA:CR46117	long non-coding RNA:CR46117	GAGA type 1	indirect	AATAATAGAGAGAGAACTTTTAATT		1.4507e-08	0.345575	0	0	0	0
FBgn0267786	lncRNA:CR46117	long non-coding RNA:CR46117	GAGA type 1	indirect	TATTAAAACGAGAGACAACTATATC		1.4507e-08	0.345575	0	0	0	0
FBgn0266868	lncRNA:CR45329	long non-coding RNA:CR45329	GAGA type 1	direct	GGTTAAATAGAGTTCGGATGGAATA		0.000420798	0.343848	1	0	0	0
FBgn0266868	lncRNA:CR45329	long non-coding RNA:CR45329	GAGA type 2	indirect	ACTAAAAACTGAGAATGAGATATGAAGA		0.000420798	0.343848	1	0	0	0
FBgn0266024	lncRNA:CR44789	long non-coding RNA:CR44789	GAGA type 1	direct	GCTTGGATAGAGTTCAAATTCCACT		1.14297e-07	0.339843	0	0	0	0
FBgn0266024	lncRNA:CR44789	long non-coding RNA:CR44789	GAGA type 2	direct	AGGATAAACTGAGCTGGAGTACGAACAA		1.14297e-07	0.339843	0	0	0	0
FBgn0267058	lncRNA:CR45502	long non-coding RNA:CR45502	GAGA type 2	direct	TCTCACCCTGGAGCTAGAGCAGCTGCAG		0.00018933	0.334771	0	0	0	0
FBgn0267454	asRNA:CR45804	antisense RNA:CR45804	GAGA type 2	direct	GCGTGCGAGTGAGTGCGAGCATAACAAA		5.32608e-12	0.330135	1	0	0	0
FBgn0267454	asRNA:CR45804	antisense RNA:CR45804	GAGA type 2	direct	GAGTGCGTGCGAGAGAGAGGGAAGCAAA		5.32608e-12	0.330135	1	0	0	0
FBgn0267807	lncRNA:CR46132	long non-coding RNA:CR46132	GAGA type 1	indirect	GCAAACGGGGAGCGAAATATGTATA		3.80387e-05	0.327135	1	0	0	0
FBgn0267807	lncRNA:CR46132	long non-coding RNA:CR46132	GAGA type 1	direct	TGAAGGTGCGAGCGAAAATGGTGCT		3.80387e-05	0.327135	1	0	0	0
FBgn0267807	lncRNA:CR46132	long non-coding RNA:CR46132	GAGA type 1	direct	CCGCCAAGAGAGTGATAAAGTTTAA		3.80387e-05	0.327135	1	0	0	0
FBgn0267807	lncRNA:CR46132	long non-coding RNA:CR46132	GAGA type 1	direct	CAACATGATGAGAGACATCTTTCAA		3.80387e-05	0.327135	1	0	0	0
FBgn0267807	lncRNA:CR46132	long non-coding RNA:CR46132	GAGA type 2	direct	CTTTTTTTGTGAGCCCTCTAATGATCTT		3.80387e-05	0.327135	1	0	0	0
FBgn0267807	lncRNA:CR46132	long non-coding RNA:CR46132	GAGA type 2	direct	TATAATTCGGGAGAGAGAGATTAGCTAG		3.80387e-05	0.327135	1	0	0	0
FBgn0267144	lncRNA:CR45584	long non-coding RNA:CR45584	GAGA type 1	indirect	ATATGCGGTGAGAGAAAACAGTTTA		2.77236e-05	0.326115	1	0	0	0
FBgn0267144	lncRNA:CR45584	long non-coding RNA:CR45584	GAGA type 1	indirect	CGATAAGCAGAGTGAAGCGTATAGG		2.77236e-05	0.326115	1	0	0	0
FBgn0267144	lncRNA:CR45584	long non-coding RNA:CR45584	GAGA type 1	indirect	AGTTCACACTCTCGATTCGCTTAAA		2.77236e-05	0.326115	1	0	0	0
FBgn0265104	lncRNA:CR44206	long non-coding RNA:CR44206	GAGA type 1	indirect	ACAAAAGCTGAGAGAGCATAGTGCG		0.00416643	0.321386	1	0	0	0
FBgn0265104	lncRNA:CR44206	long non-coding RNA:CR44206	GAGA type 1	indirect	CGAACGAAGGAGTGACGAAGGAAAA		0.00416643	0.321386	1	0	0	0
FBgn0017424	asRNA:CR11538	antisense RNA:CR11538	GAGA type 1	direct	GGTGCAGATGAGCGAACTAGTTATC		0.000862021	0.320304	1	0	0	0
FBgn0017424	asRNA:CR11538	antisense RNA:CR11538	GAGA type 1	direct	TTGAAAAGAGAGTGACTTGTGTTGA		0.000862021	0.320304	1	0	0	0
FBgn0017424	asRNA:CR11538	antisense RNA:CR11538	GAGA type 2	direct	AGATCCAGTGGAGCCAGAGCCTCCAAGG		0.000862021	0.320304	1	0	0	0
FBgn0264723	lncRNA:CR43991	long non-coding RNA:CR43991	GAGA type 2	direct	GCTGGACCAGGAGCAGGAGTAATCCCAC		9.90174e-07	0.315063	0	0	0	0
FBgn0266167	asRNA:CR44873	antisense RNA:CR44873	GAGA type 1	direct	CAATCTAAGGAGAGAAATCAACATT		0.00347197	0.314631	1	0	0	0
FBgn0266874	lncRNA:CR45335	long non-coding RNA:CR45335	GAGA type 1	indirect	CATATTATGGAGAGGTAATATGTTA		1.07854e-07	0.311077	0	0	0	0
FBgn0266156	lncRNA:CR44862	long non-coding RNA:CR44862	GAGA type 2	direct	CAGTGAACCTGAGCTTGAGTCTCGGCCA		0.0169984	0.303517	0	0	0	0
FBgn0266156	lncRNA:CR44862	long non-coding RNA:CR44862	GAGA type 2	indirect	GTTCACTGGAGAGCCAGAGTCAGAGCCA		0.0169984	0.303517	0	0	0	0
FBgn0266156	lncRNA:CR44862	long non-coding RNA:CR44862	GAGA type 2	indirect	TGGAGAGCCAGAGTCAGAGCCAGAGCCT		0.0169984	0.303517	0	0	0	0
FBgn0266156	lncRNA:CR44862	long non-coding RNA:CR44862	GAGA type 2	indirect	GCCAGAGTCAGAGCCAGAGCCTGGCTGG		0.0169984	0.303517	0	0	0	0
FBgn0266116	lncRNA:CR44842	long non-coding RNA:CR44842	GAGA type 1	direct	CGCAGATCTGAGCTCTAATCTCTGC		2.24591e-05	0.303139	0	0	0	0
FBgn0266737	asRNA:CR45210	antisense RNA:CR45210	GAGA type 1	direct	AAAGGCCAGGAGCTCCAGCAGAGAG		0.0189387	0.300263	0	0	0	0
FBgn0266027	asRNA:TS15	antisense RNA:testis-specific 15	GAGA type 1	direct	AATCGCTTGGAGAGAAAACGTTTGC		3.25473e-07	0.299918	1	1	0	0
FBgn0264353	asRNA:CR43809	antisense RNA:CR43809	GAGA type 1	indirect	GCTTTCTGGGAGCTCAATGTAAATT		0.0484522	0.298919	1	0	0	0
FBgn0264353	asRNA:CR43809	antisense RNA:CR43809	GAGA type 1	indirect	AAACAATCGGAGCGACTGCCATCCC		0.0484522	0.298919	1	0	0	0
FBgn0267261	lncRNA:CR45697	long non-coding RNA:CR45697	GAGA type 1	indirect	AAGGCAGTCGAGTGGAAATTTTTTA		1.2156e-05	0.297552	0	0	0	0
FBgn0265802	lncRNA:CR44591	long non-coding RNA:CR44591	GAGA type 1	indirect	TTGTGCACTGAGAGAAAAGATGAGT		6.17542e-06	0.290894	0	0	0	0
FBgn0266593	lncRNA:CR45118	long non-coding RNA:CR45118	GAGA type 1	indirect	AAAGCAAACGAGAGGGAATGAAAGG		3.68764e-05	0.286459	1	0	0	0
FBgn0264883	lncRNA:CR44074	long non-coding RNA:CR44074	GAGA type 1	direct	GAAAACCAAGAGCTCTTAAATAAAT		1.92971e-10	0.286158	1	0	0	0
FBgn0264883	lncRNA:CR44074	long non-coding RNA:CR44074	GAGA type 1	direct	CCTATTTACGAGCTCCGATGGCTGG		1.92971e-10	0.286158	1	0	0	0
FBgn0264266	lncRNA:CR43766	long non-coding RNA:CR43766	GAGA type 1	direct	TTTGAATCCGAGAGACGGCAATGGC		2.54793e-18	0.277746	0	0	0	0
FBgn0264266	lncRNA:CR43766	long non-coding RNA:CR43766	GAGA type 1	indirect	CGGTAAACAGAGAGACTGTCATAGA		2.54793e-18	0.277746	0	0	0	0
FBgn0264266	lncRNA:CR43766	long non-coding RNA:CR43766	GAGA type 1	indirect	TGTGGAGGCGAGAGGTTCGGAGATG		2.54793e-18	0.277746	0	0	0	0
FBgn0267062	lncRNA:CR45506	long non-coding RNA:CR45506	GAGA type 1	indirect	TTTCCTGCAGAGCTCCTTAGGAACT		5.2943e-15	0.275202	1	0	0	0
FBgn0267062	lncRNA:CR45506	long non-coding RNA:CR45506	GAGA type 1	direct	GTTCCTAAGGAGCTCTGCAGGAAAC		5.2943e-15	0.275202	1	0	0	0
FBgn0287614	lncRNA:CR46483	long non-coding RNA:CR46483	GAGA type 2	indirect	CTTATGGATCGAGGACTAGTCTTAATGT		0.0104994	0.26623	1	0	0	0
FBgn0266043	lncRNA:CR44808	long non-coding RNA:CR44808	GAGA type 2	indirect	ACGTATACTTGAGTACGAGTATATTCTT		9.47289e-05	0.264333	1	0	0	0
FBgn0265550	lncRNA:CR44400	long non-coding RNA:CR44400	GAGA type 1	indirect	TGTTTGTGTGAGAGATAGATAGAGA		3.50426e-05	0.262037	1	0	0	0
FBgn0265550	lncRNA:CR44400	long non-coding RNA:CR44400	GAGA type 1	indirect	AGATAGATAGAGAGAGAGGGAGAAA		3.50426e-05	0.262037	1	0	0	0
FBgn0265550	lncRNA:CR44400	long non-coding RNA:CR44400	GAGA type 2	indirect	CTTTCACTTCGAGTCCTCTTCTCTCTTT		3.50426e-05	0.262037	1	0	0	0
FBgn0265550	lncRNA:CR44400	long non-coding RNA:CR44400	GAGA type 2	direct	GACTCGAAGTGAAAGAGAGCGCCATTCT		3.50426e-05	0.262037	1	0	0	0
FBgn0265550	lncRNA:CR44400	long non-coding RNA:CR44400	GAGA type 2	indirect	GAGATAGATAGAGAGAGAGGGAGAAAGG		3.50426e-05	0.262037	1	0	0	0
FBgn0265550	lncRNA:CR44400	long non-coding RNA:CR44400	GAGA type 2	indirect	TAGATAGAGAGAGAGGGAGAAAGGAAGA		3.50426e-05	0.262037	1	0	0	0
FBgn0266786	lncRNA:CR45251	long non-coding RNA:CR45251	GAGA type 1	indirect	TCAGCTGTTGAGTGATAAAGAAAAT		5.10728e-05	0.259544	1	0	0	0
FBgn0265704	lncRNA:CR44511	long non-coding RNA:CR44511	GAGA type 2	direct	CATTCAAATGGAGCGAGAGCATTGGAAT		0.000199782	0.259427	0	0	0	0
FBgn0267715	asRNA:CR46048	antisense RNA:CR46048	GAGA type 1	direct	AATAATAATGAGAGAAACGTAAGTT		7.36749e-05	0.255574	0	0	0	0
FBgn0265911	lncRNA:CR44700	long non-coding RNA:CR44700	GAGA type 1	direct	TGCCAATTCGAGTGATTATGAGAGG		1.39513e-09	0.255035	0	0	0	0
FBgn0265911	lncRNA:CR44700	long non-coding RNA:CR44700	GAGA type 2	direct	GAGTCTTATCGAGTACTCTTTGATTAGA		1.39513e-09	0.255035	0	0	0	0
FBgn0266022	lncRNA:CR44787	long non-coding RNA:CR44787	GAGA type 2	indirect	GGAAAGCCTGGAGAAAGAGTACACGAGC		0.00118694	0.25037	0	0	0	0
[truncated: 182 more rows]
